# Supplementary material for: Bacillus paralicheniformis RP01 Enhances the Expression of Growth-Related Genes in Cotton and Promotes Plant Growth by Altering Microbiota inside and outside the Root
Source: Int J Mol Sci. 2023 Apr 13;24(8):7227. doi: 10.3390/ijms24087227 (PMC10138817; doi:10.3390/ijms24087227)
Supplement: Supplementary file 1 [file ijms-24-07227-s001.zip]

Archive with 8 entries (8 files):
- Supplementary file Table S3.xlsx
- Supplementary file Table S4.xlsx
- Supplementary file Table S5.xlsx
- Supplementary file Table S6.xlsx
- Supplementary file Table S7.xlsx
- Supplementary file Table S8.xlsx
- Supplementary file Table S9.xlsx
- RP01-Supplementary Materials.pdf
