# Supplementary material for: Bacillus paralicheniformis RP01 Enhances the Expression of Growth-Related Genes in Cotton and Promotes Plant Growth by Altering Microbiota inside and outside the Root
Source: Int J Mol Sci. 2023 Apr 13;24(8):7227. doi: 10.3390/ijms24087227 (PMC10138817; doi:10.3390/ijms24087227)
Supplement: Supplementary file 1 [file ijms-24-07227-s001.zip › Supplementary file Table S3.xlsx]

## Sheet: Supplementary file Table S3
Table S3: Alpha diversity indexes
Symbol	Category	Index type	Mock	Inoculated
(A.) Rhizosphere bacteria	community richness	chao	667.95±67.19 a	770.85±60.42 a
		ace	673.52±55.64 a	758.68±31.56 a
		sobs	561.33±39.11 a	616.33±12.74 a
		jack	720.38±85.79 a	925.66±222.16 a
		bootstrap	625.15±44.93 a	690.59±18.13 a
	community evenness	simpsoneven	0.102±0.027 a	0.096±0.013 a
		shannoneven	0.771±0.026 a	0.780±0.010 a
		heip	0.236±0.038 a	0.242±0.016 a
		smithwilson	0.434±0.005 a	0.429±0.002 a
	community diversity	shannon	4.88±0.19 a	5.01±0.05 a
		simpson	0.018±0.005 a	0.017±0.002 a
		npshannon	4.93±0.19 a	5.06±0.04 a
		bergerparker	0.068±0.015 a	0.073±0.008 a
		invsimpson	57.63±17.96 a	59.62±6.85 a
		qstat	138.61±15.87 a	151.42±9.20 a
	community coverage	coverage	0.988±0.001 a	0.986±0.002 a
Symbol	Category	Index type	Mock	Inoculated
(B.) Root bacteria	community richness	chao	472.12±3.86 a	537.18±70.49 a
		ace	550.18±68.95 a	553.51±74.27 a
		sobs	293.00±51.80 a	428.67±95.48 a
		jack	560.75±54.80 a	581.42±55.35 a
		bootstrap	346.15±55.41 a	487.39±98.23 a
	community evenness	simpsoneven	0.010±0.001 a	0.032±0.020 a
		shannoneven	0.358±0.075 a	0.579±0.146 a
		heip	0.024±0.009 a	0.094±0.063 a
		smithwilson	0.411±0.010 a	0.418±0.016 a
	community diversity	shannon	2.04±0.49 a	3.52±1.01 a
		simpson	0.344±0.098 a	0.108±0.090 b
		npshannon	2.10±0.49 a	3.58±1.00 a
		bergerparker	0.523±0.113 a	0.220±0.130 b
		invsimpson	3.05±0.75 a	14.94±11.47 a
		qstat	93.55±10.01 b	121.70±12.23 a
	community coverage	coverage	0.989±0.001 a	0.989±0.001 a
Symbol	Category	Index type	Mock	Inoculated
(C.) Root fungi	community richness	chao	109.63±2.41 a	120.87±10.60 a
		ace	105.3±2.24 a	110.78±6.52 a
		sobs	100.00±5.00 a	104.67±7.37 a
		jack	119.17±11.56 a	123.73±12.11 a
		bootstrap	105.94±3.81 a	110.87±6.95 a
	community evenness	simpsoneven	0.012±0.001 a	0.010±0.001 a
		shannoneven	0.104±0.030 a	0.070±0.008 a
		heip	0.006±0.002 a	0.004±0.000 a
		smithwilson	0.414±0.038 a	0.380±0.024 a
	community diversity	shannon	0.48±0.14 a	0.32±0.04 a
		simpson	0.847±0.068 a	0.923±0.012 a
		npshannon	0.48±0.14 a	0.33±0.04 a
		bergerparker	0.918±0.038 a	0.961±0.006 a
		invsimpson	1.19±0.09 a	1.08±0.01 a
		qstat	43.16±7.90 a	43.88±2.64 a
	community coverage	coverage	1.000±0.000 a	1.000±0.000± a
