# Supplementary material for: Bacillus paralicheniformis RP01 Enhances the Expression of Growth-Related Genes in Cotton and Promotes Plant Growth by Altering Microbiota inside and outside the Root
Source: Int J Mol Sci. 2023 Apr 13;24(8):7227. doi: 10.3390/ijms24087227 (PMC10138817; doi:10.3390/ijms24087227)
Supplement: Supplementary file 1 [file ijms-24-07227-s001.zip › Supplementary file Table S4.xlsx]

## Sheet: Supplementary file Table S4
Table S4: Significant differences on genus level after inoculted with B. paralicheniformis RP01
A. Rhizosphere										B. Root
Species name	Mock-Mean(%)	Mock-Sd(%)	Inoculted-Mean(%)	Inoculted-Sd(%)	P-value	Lower ci	Upper ci	Effectsize		Species name	Mock-Mean(%)	Mock-Sd(%)	Inoculted-Mean(%)	Inoculted-Sd(%)	P-value	Lower ci	Upper ci	Effectsize
g__WCHB1-32	8.512	2.829	5.112	4.263	0.3138	-4.801	11.6	3.4		g__unclassified_f__Rhodocyclaceae	75.76	8.925	33.92	22.01	0.03799	3.768	79.91	41.84
g__Streptomyces	4.281	0.6748	5.975	1.257	0.1088	-3.981	0.5929	-1.694		g__Hydrogenophaga	3.325	1.36	10.79	5.26	0.07601	-16.17	1.244	-7.465
g__Bradyrhizobium	4.482	1.165	5.619	1.275	0.3179	-3.905	1.631	-1.137		g__unclassified_f__Comamonadaceae	3.919	1.266	6.335	3.071	0.2762	-7.741	2.909	-2.416
g__Paludibaculum	4.149	0.8322	4.275	3.78	0.9578	-6.33	6.078	-0.126		g__Acinetobacter	0.5666	0.7569	5.927	8.363	0.3309	-18.82	8.1	-5.36
g__Lentimicrobium	5.837	3.171	1.607	1.937	0.1199	-1.726	10.19	4.23		g__Actinoplanes	0.1499	0.1973	5.01	4.537	0.1374	-12.14	2.419	-4.86
g__Pseudolabrys	3.277	0.877	3.148	0.3432	0.8242	-1.381	1.639	0.129		g__unclassified_o__Burkholderiales	1.736	0.6714	0.8125	0.7191	0.1793	-0.6535	2.501	0.9235
g__Rhodanobacter	3.085	0.5121	2.632	1.477	0.6424	-2.053	2.959	0.453		g__Allorhizobium-Neorhizobium-Pararhizobium-Rhizobium	0.8335	0.5226	1.694	0.8291	0.203	-2.432	0.7105	-0.8605
g__norank_f__Micropepsaceae	2.198	0.5069	3.193	1.423	0.3174	-3.416	1.426	-0.995		g__unclassified_f__Rhizobiaceae	0.6326	0.3019	1.766	0.9257	0.114	-2.694	0.4274	-1.133
g__Caulobacter	2.375	0.1946	2.929	0.6543	0.2321	-1.648	0.5402	-0.554		g__Steroidobacter	0.7136	0.2932	1.328	1.166	0.426	-2.542	1.313	-0.6144
g__Actinomadura	1.469	0.2083	3.559	4.048	0.4224	-8.587	4.407	-2.09		g__Niastella	0.4557	0.2024	1.481	1.445	0.2906	-3.364	1.314	-1.025
g__Candidatus_Solibacter	1.625	0.4677	3.064	0.6973	0.0412	-2.785	-0.0931	-1.439		g__norank_f__BIrii41	0.4137	0.2885	1.418	1.474	0.3112	-3.412	1.403	-1.004
g__Opitutus	2.656	0.7297	0.8964	0.7666	0.04501	0.06306	3.456	1.76		g__Ochrobactrum	0.5187	0.2552	1.166	1.023	0.3472	-2.337	1.043	-0.6473
g__Treponema	1.946	1.284	0.8964	0.9122	0.3127	-1.475	3.574	1.05		g__Bradyrhizobium	0.5187	0.2513	0.8065	0.3261	0.2925	-0.9477	0.3721	-0.2878
g__Azospira	1.301	1.593	1.517	1.834	0.8851	-4.11	3.678	-0.216		g__Dongia	0.4257	0.1996	0.8695	0.5237	0.2422	-1.342	0.4546	-0.4438
g__Gemmatimonas	0.7315	0.3061	2.057	0.4684	0.01483	-2.222	-0.4286	-1.325		g__Pseudomonas	0.3178	0.239	0.8934	0.9486	0.3657	-2.144	0.9925	-0.5756
g__unclassified_f__Rhodanobacteraceae	1.34	1.158	1.439	1.129	0.9207	-2.691	2.493	-0.099		g__Haliangium	0.5157	0.09187	0.6656	0.2834	0.4327	-0.6275	0.3277	-0.1499
g__Devosia	1.193	0.3111	1.58	0.6881	0.4251	-1.598	0.8235	-0.387		g__Mitsuaria	0.3208	0.2176	0.7256	0.5173	0.2797	-1.304	0.4948	-0.4048
g__Pleomorphomonas	2.165	1.527	0.4137	0.2843	0.1227	-0.7385	4.241	1.751		g__Acidovorax	0.3088	0.153	0.7196	0.645	0.3436	-1.473	0.6518	-0.4108
g__Burkholderia-Caballeronia-Paraburkholderia	0.9414	0.6165	1.334	1.282	0.6575	-2.673	1.888	-0.3926		g__Ohtaekwangia	0.2009	0.06122	0.8245	0.8669	0.2818	-2.017	0.7695	-0.6236
g__Mesorhizobium	1.319	0.06381	0.9534	0.5596	0.3236	-0.5372	1.268	0.3656		g__Zoogloea	0.4377	0.07489	0.5397	0.2982	0.5965	-0.5949	0.3909	-0.102
g__Allorhizobium-Neorhizobium-Pararhizobium-Rhizobium	1.52	1.299	0.7465	0.3781	0.378	-1.395	2.942	0.7735		g__Azohydromonas	0.008994	0.008994	0.8785	0.7496	0.115	-2.071	0.3322	-0.8695
g__Flavobacterium	1.52	1.29	0.7405	0.3056	0.366	-1.346	2.905	0.7795		g__Opitutus	0.09894	0.06232	0.7285	1.129	0.3896	-2.442	1.183	-0.6296
g__Ignavibacterium	1.301	1.137	0.9174	1.054	0.6902	-2.102	2.869	0.3836		g__Acidibacter	0.2818	0.2108	0.5007	0.5479	0.5536	-1.16	0.7221	-0.2189
g__Phenylobacterium	0.8665	0.3173	1.307	0.1548	0.09665	-1.006	0.1254	-0.4405		g__Azospirillum	0.1319	0.09099	0.5696	0.5323	0.233	-1.303	0.4279	-0.4377
g__Sphingomonas	1.337	0.1311	0.7885	0.1423	0.007975	0.2383	0.8587	0.5485		g__Streptomyces	0.2758	0.1042	0.4137	0.3009	0.4949	-0.6483	0.3725	-0.1379
g__norank_f__norank_o__norank_c__norank_p__Armatimonadota	1.127	1.486	0.9894	0.4677	0.8856	-2.36	2.635	0.1376		g__Mesorhizobium	0.1289	0.06507	0.4797	0.2551	0.08222	-0.7728	0.07121	-0.3508
g__Dokdonella	0.5756	0.1448	1.313	0.821	0.2002	-2.074	0.599	-0.7374		g__Caulobacter	0.1619	0.1169	0.4347	0.3231	0.241	-0.8236	0.278	-0.2728
g__Ramlibacter	0.6296	0.3247	1.13	0.5265	0.2335	-1.492	0.4912	-0.5004		g__Kamptonema_PCC-6407	0	0	0.5876	0.5168	0.1202	-1.416	0.2408	-0.5876
g__unclassified_f__Acidobacteriaceae_Subgroup_1	0.8815	0.4675	0.7945	0.4626	0.8301	-0.9673	1.141	0.087		g__Polyangium_brachysporum_group	0.2279	0.1139	0.3568	0.3279	0.5551	-0.6853	0.4275	-0.1289
g__unclassified_f__Comamonadaceae	0.9354	0.55	0.6836	0.4164	0.5615	-0.854	1.358	0.2518		g__norank_f__Roseiflexaceae	0.1139	0.04437	0.4347	0.2617	0.1044	-0.7463	0.1047	-0.3208
g__Dongia	0.4047	0.1979	1.106	0.5489	0.1057	-1.637	0.234	-0.7013		g__Cupriavidus	0.2458	0.2559	0.2998	0.194	0.7855	-0.5688	0.4608	-0.054
g__Actinotalea	0.7555	0.5921	0.6836	0.4799	0.878	-1.15	1.294	0.0719		g__Sphingomonas	0.1199	0.0681	0.4197	0.1671	0.04514	-0.589	-0.01055	-0.2998
g__Ancalomicrobium	0.3688	0.2727	0.9684	0.9442	0.3502	-2.175	0.9758	-0.5996		g__Pseudoxanthomonas	0.04497	0.0238	0.4707	0.3825	0.1267	-1.04	0.1886	-0.4257
g__norank_f__Ktedonobacteraceae	0.9924	0.8997	0.3148	0.2339	0.2754	-0.8125	2.168	0.6776		g__Ramlibacter	0.09294	0.111	0.4107	0.444	0.2954	-1.051	0.4159	-0.3178
g__norank_f__env.OPS_17	0.3988	0.5276	0.8994	0.6493	0.3585	-1.842	0.8405	-0.5006		g__Azospira	0.2758	0.1722	0.1859	0.1208	0.4999	-0.2473	0.4271	0.0899
g__Rhodopseudomonas	0.5906	0.3787	0.6716	0.5898	0.8512	-1.205	1.043	-0.081		g__Roseisolibacter	0.008994	0	0.4377	0.4941	0.2073	-1.221	0.3633	-0.4287
g__Novosphingobium	0.5007	0.2669	0.7315	0.3188	0.3906	-0.8973	0.4357	-0.2308		g__unclassified_o__Cyanobacteriales	0	0	0.4197	0.4662	0.1939	-1.167	0.3276	-0.4197
g__Bryobacter	0.5487	0.03243	0.6686	0.348	0.5843	-0.6802	0.4404	-0.1199		g__Methyloversatilis	0.2069	0.1148	0.2039	0.1198	0.9765	-0.263	0.269	0.003
g__norank_f__Acetobacteraceae	0.4977	0.2322	0.5517	0.2249	0.7868	-0.5722	0.4642	-0.054		g__Anoxybacillus	0.3388	0.4427	0.06296	0.0238	0.3418	-0.4348	0.9865	0.2758
g__Rhizomicrobium	0.7735	0.7261	0.2698	0.1568	0.3054	-0.6871	1.694	0.5037		g__norank_f__Microscillaceae	0.09894	0.08858	0.2968	0.3302	0.3729	-0.7459	0.3502	-0.1979
g__Actinocatenispora	0.7106	0.6748	0.3178	0.1622	0.3825	-0.7197	1.505	0.3928		g__Novosphingobium	0.05996	0.03635	0.3208	0.03745	0.0009796	-0.3445	-0.1772	-0.2608
g__Bdellovibrio	0.5067	0.4114	0.4887	0.01374	0.9433	-0.6418	0.6778	0.018		g__Pseudolabrys	0.1019	0.06507	0.2698	0.2297	0.2901	-0.5506	0.2148	-0.1679
g__norank_f__norank_o__norank_c__Sericytochromatia	0.6266	0.4895	0.3658	0.3082	0.4785	-0.6664	1.188	0.2608		g__Altererythrobacter	0.08994	0.0238	0.2638	0.1365	0.09542	-0.396	0.04825	-0.1739
g__norank_f__norank_o__Kapabacteriales	0.3778	0.2305	0.5996	0.3966	0.4493	-0.9571	0.5135	-0.2218		g__Piscinibacter	0.1199	0.01872	0.2309	0.153	0.2806	-0.3581	0.1361	-0.111
g__norank_f__Caulobacteraceae	0.4197	0.135	0.5247	0.2167	0.5158	-0.5143	0.3043	-0.105		g__norank_f__Vicinamibacteraceae	0.04797	0.02748	0.2938	0.25	0.1656	-0.649	0.1573	-0.2458
g__Thiobacillus	0.7256	0.315	0.2069	0.1666	0.06526	-0.05251	1.09	0.5187		g__Sphingobium	0.1229	0.1042	0.2099	0.04527	0.2558	-0.2691	0.09511	-0.087
g__norank_f__Xanthobacteraceae	0.3988	0.0663	0.5337	0.2819	0.465	-0.5991	0.3293	-0.1349		g__IMCC26134	0.07495	0.005193	0.2548	0.3325	0.4018	-0.7129	0.3532	-0.1799
g__Nitrosospira	0.002998	0.005193	0.9144	1.584	0.3753	-3.451	1.628	-0.9114		g__Geothrix	0.2998	0.3011	0.02399	0.04154	0.191	-0.2114	0.763	0.2758
g__Ochrobactrum	0.5067	0.3638	0.3958	0.2037	0.6689	-0.5575	0.7793	0.1109		g__Aquabacterium	0.1199	0.1066	0.1949	0.2986	0.7032	-0.5832	0.4332	-0.075
g__Pseudomonas	0.2009	0.09054	0.6986	0.6569	0.2635	-1.561	0.5653	-0.4977		g__Tahibacter	0.1709	0.2263	0.1379	0.05852	0.819	-0.3417	0.4077	0.033
g__Edaphobaculum	0.6236	0.4969	0.2668	0.07755	0.2865	-0.4494	1.163	0.3568		g__Pseudoduganella	0.09594	0.04251	0.2039	0.06507	0.07393	-0.2326	0.01663	-0.108
g__Reyranella	0.2339	0.2259	0.6506	0.8155	0.4417	-1.773	0.9398	-0.4167		g__norank_f__norank_o__Micavibrionales	0.01799	0.008994	0.2788	0.3993	0.3212	-0.901	0.3794	-0.2608
g__Cellulomonas	0.5487	0.4909	0.3148	0.2061	0.4892	-0.6195	1.087	0.2339		g__Paracoccus	0.002998	0.005193	0.2908	0.2424	0.1089	-0.6765	0.1008	-0.2878
g__norank_f__norank_o__Vicinamibacterales	0.2309	0.06507	0.6056	0.2925	0.09619	-0.855	0.1056	-0.3747		g__Bosea	0.06596	0.05114	0.2249	0.1428	0.1438	-0.4021	0.0842	-0.1589
g__Luteimonas	0.3928	0.3395	0.4407	0.1472	0.8333	-0.6411	0.5453	-0.0479		g__unclassified_c__Alphaproteobacteria	0.1019	0.09187	0.1889	0.07841	0.2805	-0.2806	0.1066	-0.087
g__Chitinophaga	0.4467	0.1551	0.3688	0.1948	0.6164	-0.3212	0.477	0.0779		g__Methylophilus	0.07196	0.0238	0.2039	0.1198	0.1347	-0.3277	0.06385	-0.1319
g__unclassified_f__Pseudonocardiaceae	0.4857	0.2465	0.2668	0.1276	0.2438	-0.226	0.6638	0.2189		g__Devosia	0.05696	0.03159	0.2069	0.1325	0.1293	-0.3683	0.06841	-0.1499
g__Methylocystis	0.5906	0.3999	0.1529	0.1797	0.1588	-0.2651	1.14	0.4377		g__norank_f__A4b	0.1229	0.07326	0.1199	0.07326	0.9624	-0.1631	0.1691	0.003
g__Mucilaginibacter	0.2069	0.1534	0.5247	0.793	0.5329	-1.613	0.9769	-0.3178		g__Rhizobacter	0.06596	0.06122	0.1739	0.01872	0.04324	-0.2106	-0.00532	-0.1079
g__Nocardioides	0.3688	0.1148	0.3508	0.3522	0.937	-0.5758	0.6118	0.018		g__unclassified_o__Chlamydiales	0.06596	0.04056	0.1679	0.2447	0.5159	-0.4995	0.2957	-0.1019
g__Methyloversatilis	0.3028	0.2749	0.3928	0.4229	0.7728	-0.8985	0.7185	-0.09		g__Nitrospira	0.05996	0.01374	0.1709	0.1091	0.1554	-0.2872	0.06533	-0.1109
g__Azospirillum	0.3928	0.0527	0.2458	0.1866	0.2596	-0.1638	0.4578	0.147		g__MND1	0.07495	0.03745	0.1379	0.1317	0.4703	-0.2824	0.1565	-0.06295
g__unclassified_f__Oxalobacteraceae	0.4497	0.2965	0.1589	0.04527	0.1684	-0.19	0.7716	0.2908		g__Delftia	0	0	0.2099	0.3635	0.3739	-0.7926	0.3728	-0.2099
g__Citrifermentans	0.4497	0.1414	0.1559	0.1703	0.08297	-0.06102	0.6486	0.2938		g__norank_f__Rhizobiales_Incertae_Sedis	0.03298	0.01374	0.1769	0.05783	0.01376	-0.2392	-0.04864	-0.1439
g__Chthoniobacter	0.5187	0.3451	0.08395	0.05193	0.09717	-0.1247	0.9942	0.4348		g__Thermomonas	0.1049	0.09009	0.1049	0.159	1	-0.2929	0.2929	0
g__Kaistia	0.1499	0.09617	0.4527	0.2477	0.1196	-0.7287	0.1231	-0.3028		g__Enterobacter	0.1529	0.227	0.05397	0.06296	0.5073	-0.2787	0.4765	0.09893
g__unclassified_f__Gallionellaceae	0.1019	0.0727	0.4797	0.4555	0.229	-1.117	0.3616	-0.3778		g__Cellvibrio	0.05996	0.0663	0.1469	0.1462	0.4014	-0.3443	0.1704	-0.08694
g__Bauldia	0.1829	0.1042	0.3958	0.1859	0.1587	-0.5545	0.1287	-0.2129		g__Lacunisphaera	0.05097	0.03745	0.1529	0.1714	0.3711	-0.3832	0.1793	-0.1019
g__Actinoallomurus	0.1469	0.1462	0.4257	0.4353	0.3523	-1.015	0.4573	-0.2788		g__Chthonobacter	0.04797	0.02264	0.1529	0.1343	0.253	-0.3232	0.1134	-0.1049
g__Hyphomicrobium	0.3658	0.388	0.2009	0.09099	0.5132	-0.4739	0.8037	0.1649		g__Hyphomicrobium	0.05097	0.04954	0.1409	0.08062	0.175	-0.2416	0.06175	-0.08993
g__norank_f__Diplorickettsiaceae	0	0	0.5247	0.9088	0.3739	-1.981	0.9321	-0.5247		g__SM1A02	0.02698	0.02698	0.1619	0.0238	0.002898	-0.1926	-0.07725	-0.1349
g__norank_f__Fibrobacteraceae	0.2039	0.2986	0.3208	0.03405	0.5374	-0.5987	0.3649	-0.1169		g__norank_f__norank_o__norank_c__Alphaproteobacteria	0.04797	0.0527	0.1349	0.1094	0.2828	-0.2816	0.1077	-0.08693
g__Haliangium	0.1379	0.02596	0.3808	0.2819	0.2115	-0.6967	0.2109	-0.2429		g__SWB02	0.04197	0.02077	0.1289	0.05712	0.06838	-0.1844	0.0105	-0.08693
g__norank_f__norank_o__norank_c__norank_p__WPS-2	0.2219	0.1635	0.2968	0.07841	0.5135	-0.3656	0.2158	-0.0749		g__norank_f__Sandaracinaceae	0.06596	0.01872	0.1049	0.1198	0.6073	-0.2333	0.1554	-0.03894
g__norank_f__Ilumatobacteraceae	0.2069	0.09347	0.2878	0.156	0.4838	-0.3724	0.2106	-0.0809		g__Asticcacaulis	0.04497	0.0238	0.1229	0.04616	0.06005	-0.1612	0.00532	-0.07793
g__Iamia	0.2758	0.2519	0.2099	0.1768	0.7293	-0.4274	0.5592	0.0659		g__Luteimonas	0.03298	0.03405	0.1319	0.1362	0.2893	-0.324	0.1261	-0.09892
g__unclassified_o__Bacteroidales	0.3118	0.02891	0.1559	0.1786	0.2099	-0.1341	0.4459	0.1559		g__unclassified_f__Chitinophagaceae	0.05696	0.03635	0.1079	0.008994	0.07788	-0.111	0.009085	-0.05094
g__Desulfovibrio	0.3178	0.1896	0.1469	0.1462	0.284	-0.2129	0.5547	0.1709		g__Chryseolinea	0.03298	0.01039	0.1259	0.1105	0.2206	-0.2708	0.08499	-0.09292
g__Geobacter	0.2668	0.1754	0.1769	0.1777	0.5665	-0.3103	0.4901	0.0899		g__norank_f__LWQ8	0.005996	0.01039	0.1499	0.2218	0.3245	-0.4998	0.212	-0.1439
g__Bosea	0.1979	0.119	0.2249	0.0858	0.766	-0.2622	0.2082	-0.027		g__Paludibaculum	0.01499	0.005193	0.1409	0.1397	0.1938	-0.35	0.09818	-0.1259
g__Halomonas	0.1379	0.2389	0.2788	0.1414	0.4289	-0.5859	0.3041	-0.1409		g__norank_f__Pedosphaeraceae	0.005996	0.005193	0.1439	0.1621	0.2149	-0.3979	0.1221	-0.1379
g__Gracilibacter	0.3658	0.3396	0.03898	0.02748	0.172	-0.2193	0.873	0.3268		g__norank_f__type_III	0.04797	0.01872	0.09594	0.09907	0.4562	-0.2096	0.1136	-0.04797
g__norank_f__Gemmatimonadaceae	0.2249	0.0238	0.1679	0.1317	0.5018	-0.1575	0.2715	0.057		g__Methylobacillus	0.01499	0.02596	0.1229	0.09009	0.1169	-0.2582	0.04238	-0.1079
g__norank_f__norank_o__0319-6G20	0.1979	0.119	0.1949	0.1335	0.9782	-0.2837	0.2897	0.003		g__Dokdonella	0.04497	0.04497	0.08994	0.07025	0.4032	-0.1787	0.08874	-0.04497
g__Parvibaculum	0.1409	0.05783	0.2518	0.08674	0.1391	-0.278	0.05621	-0.1109		g__Prosthecomicrobium	0.01499	0.01039	0.1199	0.08549	0.1024	-0.243	0.03314	-0.1049
g__unclassified_f__Rhizobiaceae	0.1649	0.09617	0.1949	0.09867	0.7254	-0.2509	0.1909	-0.03		g__Geobacillus	0.08695	0.1125	0.04497	0.0238	0.5614	-0.1423	0.2263	0.04198
g__norank_f__Rhodospirillaceae	0.08395	0.06751	0.2758	0.2285	0.2355	-0.5738	0.1901	-0.1918		g__norank_f__norank_o__0319-6G20	0.06296	0.05008	0.06896	0.05422	0.8949	-0.1243	0.1123	-0.006
g__Edaphobacter	0.2518	0.156	0.09894	0.07196	0.1981	-0.1225	0.4282	0.1529		g__Bryobacter	0.02698	0.03243	0.1019	0.08357	0.2211	-0.2186	0.06877	-0.07492
g__unclassified_f__Ktedonobacteraceae	0.2488	0.08501	0.1019	0.1457	0.2059	-0.1235	0.4173	0.1469		g__norank_f__Gemmatimonadaceae	0.02099	0.01374	0.09894	0.07841	0.1651	-0.2056	0.04965	-0.07795
g__norank_f__norank_o__norank_c__Alphaproteobacteria	0.1169	0.07685	0.2279	0.1003	0.203	-0.3135	0.09155	-0.111		g__Ferrovibrio	0.03898	0.02891	0.08095	0.05617	0.3139	-0.1432	0.0593	-0.04197
g__CL500-29_marine_group	0.09894	0.0939	0.2249	0.273	0.492	-0.5887	0.3368	-0.126		g__Actinomadura	0.08395	0.1377	0.03298	0.01374	0.5582	-0.1709	0.2728	0.05097
g__Nocardia	0.09594	0.02748	0.2279	0.03405	0.006419	-0.2021	-0.06182	-0.132		g__Phenylobacterium	0.03298	0.01872	0.08395	0.03745	0.1027	-0.1181	0.01614	-0.05097
g__Niastella	0.2159	0.2198	0.1079	0.07685	0.467	-0.2653	0.4813	0.108		g__Bdellovibrio	0.03898	0.02748	0.07795	0.06507	0.3933	-0.1522	0.07426	-0.03897
g__unclassified_f__Sphingobacteriaceae	0.2758	0.4623	0.04797	0.04437	0.4433	-0.5166	0.9723	0.2278		g__Pseudoflavitalea	0.02698	0.03921	0.08695	0.1054	0.408	-0.2402	0.1203	-0.05997
g__norank_f__LWQ8	0.2399	0.1835	0.08095	0.07025	0.2339	-0.156	0.4739	0.159		g__unclassified_f__Blastocatellaceae	0.01799	0.008994	0.09294	0.05989	0.09867	-0.172	0.02213	-0.07495
g__norank_f__A4b	0.2369	0.07755	0.08095	0.02698	0.03025	0.02433	0.2876	0.156		g__Azovibrio	0	0	0.1109	0.1081	0.15	-0.2842	0.06238	-0.1109
g__norank_f__norank_o__norank_c__norank_p__WS4	0.1919	0.1208	0.1229	0.153	0.5732	-0.2435	0.3815	0.069		g__Flavobacterium	0.03598	0.0238	0.07196	0.03116	0.1872	-0.09883	0.02687	-0.03598
g__Ruminiclostridium	0.2638	0.1942	0.03598	0.04759	0.1197	-0.09269	0.5483	0.2278		g__Curvibacter	0.03298	0.04954	0.07495	0.03745	0.3067	-0.1415	0.05758	-0.04197
g__norank_f__67-14	0.05397	0.0238	0.2428	0.1837	0.1521	-0.4858	0.1081	-0.1888		g__Rhodoplanes	0.02998	0.02748	0.07196	0.04759	0.2564	-0.1301	0.04611	-0.04198
g__norank_f__Pedosphaeraceae	0.09894	0.01558	0.1919	0.2623	0.5732	-0.5142	0.3282	-0.09296		g__Luteibacter	0.04197	0.01872	0.05696	0.03159	0.5185	-0.07385	0.04387	-0.01499
g__Rhodovastum	0.1379	0.1479	0.1529	0.04674	0.8752	-0.2636	0.2336	-0.015		g__unclassified_k__norank_d__Bacteria	0.06596	0.02264	0.02998	0.02264	0.1234	-0.01534	0.0873	0.03598
g__norank_f__TRA3-20	0.07795	0.0727	0.2099	0.1538	0.2503	-0.4046	0.1407	-0.132		g__Parasegetibacter	0	0	0.09594	0.1073	0.1964	-0.2679	0.07606	-0.09594
g__Sphingobium	0.1319	0.09907	0.1529	0.05617	0.7656	-0.2036	0.1616	-0.021		g__norank_f__Myxococcaceae	0.002998	0.005193	0.09294	0.08549	0.143	-0.2272	0.04735	-0.08994
g__Thermomonas	0.07795	0.08062	0.2039	0.09009	0.1456	-0.3197	0.06784	-0.126		g__1959-1	0.005996	0.005193	0.08695	0.1353	0.359	-0.298	0.1361	-0.08095
g__norank_f__Thioalkalispiraceae	0.1259	0.08858	0.1529	0.1405	0.7924	-0.2932	0.2392	-0.027		g__FFCH7168	0.008994	0.008994	0.08395	0.07755	0.1717	-0.2001	0.05019	-0.07496
g__norank_f__norank_o__Bacteroidetes_VC2.1_Bac22	0.1019	0.08828	0.1739	0.193	0.5886	-0.4122	0.2682	-0.072		g__Rhodobacter	0.01499	0.02596	0.07795	0.06122	0.1764	-0.1696	0.04363	-0.06296
g__unclassified_f__Caulobacteraceae	0.1409	0.05193	0.1349	0.05471	0.8971	-0.1149	0.1269	0.006		g__Luteitalea	0.01199	0.01039	0.08095	0.08244	0.2239	-0.2022	0.06424	-0.06896
g__norank_f__NS11-12_marine_group	0.05696	0.04056	0.2129	0.08501	0.04561	-0.3069	-0.004955	-0.1559		g__Rubellimicrobium	0.002998	0.005193	0.08994	0.08858	0.1649	-0.2292	0.05529	-0.08694
g__Christensenellaceae_R-7_group	0.1679	0.09907	0.1019	0.1003	0.4632	-0.16	0.292	0.066		g__unclassified_f__Microscillaceae	0.04797	0.02596	0.04197	0.05712	0.8766	-0.09457	0.1066	0.006
g__Hydrogenispora	0.1529	0.1325	0.1139	0.06751	0.6734	-0.1994	0.2774	0.039		g__norank_f__norank_o__11-24	0.03298	0.02891	0.05097	0.01374	0.3855	-0.0693	0.03332	-0.01799
g__Sediminibacterium	0.1649	0.2322	0.09894	0.08858	0.6696	-0.3324	0.4643	0.06596		g__Nordella	0.01799	0.01558	0.06596	0.04056	0.1284	-0.1176	0.02168	-0.04797
g__Rhodoplanes	0.1139	0.04527	0.1469	0.07755	0.5593	-0.1769	0.1109	-0.033		g__norank_f__norank_o__Microtrichales	0.008994	0.008994	0.07196	0.01799	0.005609	-0.09521	-0.03073	-0.06297
g__unclassified_k__norank_d__Bacteria	0.02399	0.01039	0.2339	0.3895	0.4036	-0.8345	0.4147	-0.2099		g__norank_f__norank_o__Candidatus_Kaiserbacteria	0.02399	0.01374	0.05397	0.07139	0.5145	-0.1465	0.08656	-0.02998
g__Dyadobacter	0.1109	0.09099	0.1469	0.0765	0.6278	-0.2266	0.1546	-0.036		g__Sphingopyxis	0.008994	0	0.06896	0.04437	0.07931	-0.1311	0.01116	-0.05997
g__Parafilimonas	0.1289	0.0687	0.1229	0.08643	0.9296	-0.171	0.183	0.006		g__YC-ZSS-LKJ147	0.01499	0.005193	0.06296	0.05471	0.2051	-0.1361	0.04012	-0.04797
g__Mycobacterium	0.1229	0.08161	0.1289	0.1003	0.9398	-0.2133	0.2013	-0.006		g__unclassified_p__Firmicutes	0.01199	0.02077	0.06596	0.08357	0.3388	-0.192	0.08407	-0.05397
g__Hydrocarboniphaga	0.02998	0.03745	0.2189	0.0527	0.007179	-0.2926	-0.08529	-0.1889		g__Methylobacterium-Methylorubrum	0.01199	0.01374	0.06596	0.04527	0.1194	-0.1298	0.02187	-0.05397
g__norank_f__Holophagaceae	0.05996	0.05989	0.1889	0.2965	0.5014	-0.6138	0.3559	-0.1289		g__unclassified_f__Hyphomonadaceae	0.01199	0.01039	0.06596	0.01039	0.003126	-0.07752	-0.03042	-0.05397
g__norank_f__JG30-KF-CM45	0.08994	0.03243	0.1589	0.03635	0.07031	-0.147	0.009127	-0.06896		g__Aeromonas	0.01799	0.008994	0.05996	0.03405	0.1079	-0.09842	0.01448	-0.04197
g__Candidatus_Koribacter	0.1199	0.04527	0.1199	0.06986	1	-0.1334	0.1334	0		g__Microvirga	0.002998	0.005193	0.07495	0.0727	0.1625	-0.1888	0.04488	-0.07195
g__Anaerovorax	0.2039	0.06986	0.03298	0.02264	0.01573	0.0532	0.2886	0.1709		g__Inhella	0.01499	0.005193	0.05996	0.05783	0.2508	-0.138	0.0481	-0.04497
g__Lacunisphaera	0.04797	0.0527	0.1889	0.1497	0.1989	-0.3953	0.1135	-0.1409		g__Aridibacter	0.02698	0.03243	0.04497	0.01799	0.4481	-0.07744	0.04146	-0.01799
g__norank_f__Chitinophagaceae	0.1229	0.05422	0.1139	0.0727	0.872	-0.1364	0.1544	0.009		g__Hirschia	0.02099	0.02077	0.04797	0.05989	0.5018	-0.1286	0.07463	-0.02698
g__norank_f__Moraxellaceae	0.02099	0.01872	0.2099	0.3179	0.3623	-0.6994	0.3216	-0.1889		g__Novispirillum	0.02099	0.02077	0.04797	0.02596	0.2326	-0.08027	0.02631	-0.02698
g__Holophaga	0.02099	0.02264	0.2099	0.3635	0.4198	-0.7727	0.3949	-0.1889		g__norank_f__norank_o__norank_c__KD4-96	0.01799	0.0238	0.05097	0.04056	0.2913	-0.1084	0.0424	-0.03298
g__norank_f__norank_o__Rhodospirillales	0.1049	0.05193	0.1259	0.09476	0.7535	-0.1942	0.1522	-0.021		g__Herpetosiphon	0.02998	0.03159	0.03898	0.03635	0.7625	-0.0862	0.0682	-0.009
g__unclassified_o__Saccharimonadales	0.09594	0.03405	0.1319	0.05989	0.4169	-0.1464	0.07447	-0.03596		g__norank_f__norank_o__CCD24	0.01499	0.01039	0.05397	0.04122	0.1874	-0.1071	0.02916	-0.03898
g__unclassified_f__Acetobacteraceae	0.08994	0.03598	0.1349	0.07994	0.4245	-0.1855	0.09556	-0.04496		g__unclassified_f__Opitutaceae	0.005996	0.01039	0.06296	0.1014	0.3877	-0.2204	0.1064	-0.05696
g__Pedobacter	0.1079	0.09476	0.1139	0.09009	0.9405	-0.2156	0.2036	-0.006		g__Vibrionimonas	0.05996	0.08161	0.008994	0.008994	0.3428	-0.08065	0.1826	0.05097
g__Phaselicystis	0.1049	0.1042	0.1139	0.06986	0.9072	-0.2101	0.1921	-0.009		g__EcFYyy-200	0	0	0.06596	0.06986	0.1773	-0.1779	0.04602	-0.06596
g__unclassified_f__Sphingomonadaceae	0.05996	0.02077	0.1529	0.2115	0.491	-0.4336	0.2477	-0.09294		g__norank_f__norank_o__Vicinamibacterales	0.01199	0.005193	0.05397	0.02698	0.05724	-0.08602	0.002062	-0.04198
g__Asticcacaulis	0.06896	0.04154	0.1439	0.1385	0.4199	-0.3067	0.1568	-0.07494		g__Mycobacterium	0.01199	0.005193	0.05397	0.04759	0.2035	-0.1187	0.03476	-0.04198
g__Caenimonas	0.09594	0.07489	0.1169	0.05898	0.7224	-0.1738	0.1318	-0.02096		g__Reyranella	0.005996	0.005193	0.05996	0.05114	0.1432	-0.1364	0.02843	-0.05396
g__unclassified_f__Beijerinckiaceae	0.1019	0.02264	0.1079	0.02698	0.7828	-0.06246	0.05046	-0.006		g__Leptolyngbya_ANT.L52.2	0	0	0.06296	0.06486	0.168	-0.1669	0.04101	-0.06296
g__Prosthecobacter	0.1409	0.1722	0.06596	0.02264	0.4962	-0.2035	0.3533	0.07494		g__Vogesella	0.005996	0.005193	0.05397	0.03116	0.05816	-0.09861	0.002664	-0.04797
g__norank_f__norank_o__norank_c__SJA-28	0.1409	0.111	0.06296	0.05397	0.3355	-0.1199	0.2758	0.07794		g__FCPS473	0	0	0.05996	0.09617	0.341	-0.2141	0.0942	-0.05996
g__Emticicia	0.1199	0.1564	0.08395	0.03159	0.716	-0.2198	0.2917	0.03595		g__Ahniella	0.01799	0.03116	0.04197	0.01872	0.3169	-0.08225	0.03429	-0.02398
g__norank_f__norank_o__norank_c__TK10	0.09594	0.07326	0.1079	0.106	0.8798	-0.2185	0.1946	-0.01196		g__Ilumatobacter	0.01799	0.008994	0.03898	0.01374	0.09126	-0.04731	0.005334	-0.02099
g__Paludisphaera	0.1109	0.04154	0.09294	0.04616	0.6422	-0.08158	0.1175	0.01796		g__P3OB-42	0.008994	0.008994	0.04797	0.02264	0.05025	-0.07803	7.434e-05	-0.03898
g__Hydrogenophaga	0.1019	0.07326	0.1019	0.1066	1	-0.2073	0.2073	0		g__norank_f__norank_o__norank_c__TK10	0.01199	0.005193	0.04497	0.03116	0.1448	-0.08362	0.01766	-0.03298
g__Inquilinus	0.03598	0.008994	0.1529	0.156	0.2648	-0.3674	0.1336	-0.1169		g__Vicinamibacter	0.01499	0.01374	0.03898	0.03745	0.3564	-0.08793	0.03995	-0.02399
g__unclassified_o__Sphingobacteriales	0.1439	0.07362	0.04497	0.0238	0.09114	-0.0251	0.223	0.09893		g__Lysobacter	0.002998	0.005193	0.05097	0.04527	0.1423	-0.121	0.02507	-0.04797
g__norank_f__norank_o__S085	0.06296	0.07789	0.1229	0.135	0.5417	-0.3098	0.1899	-0.05994		g__Citrifermentans	0.01199	0.01374	0.04197	0.03635	0.2524	-0.09227	0.03231	-0.02998
g__Bacteriovorax	0.09894	0.03116	0.08395	0.07214	0.7577	-0.111	0.141	0.01499		g__Thermus	0.04197	0.0727	0.01199	0.005193	0.5155	-0.08685	0.1468	0.02998
g__Altererythrobacter	0.06596	0.04954	0.1169	0.04122	0.2426	-0.1542	0.05237	-0.05094		g__unclassified_f__Desulfocapsaceae	0.01799	0.01558	0.03298	0.04154	0.5898	-0.08611	0.05613	-0.01499
g__Nitrosomonas	0.09594	0.1117	0.08395	0.1088	0.9005	-0.238	0.2619	0.01199		g__norank_f__Xanthobacteraceae	0.008994	0.008994	0.04197	0.04251	0.2589	-0.1026	0.03668	-0.03298
g__Kribbella	0.1529	0.2027	0.02698	0	0.3426	-0.199	0.4508	0.1259		g__Gemmatimonas	0.008994	0.008994	0.04197	0.01039	0.01417	-0.055	-0.01095	-0.03298
g__norank_f__BIrii41	0.04197	0.0727	0.1379	0.1775	0.4351	-0.4034	0.2115	-0.09593		g__Microbacterium	0.008994	0.01558	0.03898	0.02596	0.1615	-0.07852	0.01855	-0.02999
g__norank_f__Fimbriimonadaceae	0.05696	0.04437	0.1199	0.1703	0.569	-0.345	0.2192	-0.06294		g__Brevundimonas	0.008994	0.008994	0.03898	0.03635	0.2378	-0.09001	0.03004	-0.02999
g__norank_f__norank_o__Acidobacteriales	0.06896	0.03745	0.1049	0.02264	0.2275	-0.1061	0.03421	-0.03594		g__norank_f__norank_o__Rhodospirillales	0.008994	0.008994	0.03898	0.03635	0.2378	-0.09001	0.03004	-0.02999
g__norank_f__Microbacteriaceae	0.09894	0.02698	0.07196	0.05008	0.4575	-0.06421	0.1182	0.02698		g__norank_f__Steroidobacteraceae	0.01199	0.01374	0.03598	0.03598	0.3414	-0.08573	0.03775	-0.02399
g__Anaeromyxobacter	0.1049	0.06381	0.06596	0.03405	0.4035	-0.077	0.1549	0.03894		g__norank_f__norank_o__Lineage_IV	0.008994	0.008994	0.03598	0.03116	0.223	-0.07897	0.025	-0.02699
g__unclassified_f__Rhodocyclaceae	0.1649	0.2322	0.002998	0.005193	0.2938	-0.2104	0.5342	0.1619		g__unclassified_f__Pleomorphomonadaceae	0	0	0.04497	0.02698	0.04471	-0.08822	-0.001722	-0.04497
g__Ktedonobacter	0.08095	0.06791	0.08095	0.1176	1	-0.2177	0.2177	0		g__Skermanella	0	0	0.04497	0.03921	0.1179	-0.1078	0.01788	-0.04497
g__Jatrophihabitans	0.06296	0.02698	0.09894	0.06296	0.4144	-0.1458	0.07382	-0.03598		g__norank_f__Rhodanobacteraceae	0.02099	0.01039	0.02099	0.02264	1	-0.03993	0.03993	0
g__BSV13	0.06596	0.0527	0.09594	0.1117	0.6958	-0.228	0.168	-0.02998		g__Blastocatella	0.008994	0	0.03298	0.01872	0.09073	-0.05399	0.006022	-0.02399
g__unclassified_f__Micromonosporaceae	0.02998	0.03745	0.1319	0.1011	0.1768	-0.2747	0.0709	-0.1019		g__Rheinheimera	0.008994	0	0.03298	0.03635	0.3169	-0.08225	0.03428	-0.02399
g__SWB02	0.05996	0.04154	0.09594	0.0765	0.5136	-0.1755	0.1036	-0.03598		g__Rhodanobacter	0.002998	0.005193	0.03598	0.03921	0.2221	-0.09638	0.03042	-0.03298
g__unclassified_f__Propionibacteriaceae	0.1109	0.09448	0.04497	0.04122	0.3299	-0.09931	0.2312	0.06593		g__norank_f__norank_o__norank_c__norank_p__Armatimonadota	0.008994	0	0.02998	0.01872	0.1242	-0.05099	0.009022	-0.02099
g__norank_f__Beijerinckiaceae	0.07795	0.005193	0.07495	0.04056	0.9051	-0.06255	0.06855	0.003		g__norank_f__Reyranellaceae	0.008994	0	0.02998	0.01374	0.05724	-0.04301	0.001039	-0.02099
g__norank_f__Magnetospiraceae	0.04197	0.02891	0.1079	0.0238	0.038	-0.126	-0.005904	-0.06593		g__unclassified_f__Sphingomonadaceae	0.008994	0	0.02998	0.01374	0.05724	-0.04301	0.001039	-0.02099
g__I-8	0.07196	0.03243	0.07495	0.04616	0.9311	-0.09342	0.08744	-0.00299		g__Bauldia	0.01199	0.005193	0.02399	0.01872	0.3453	-0.04314	0.01914	-0.012
g__unclassified_f__Devosiaceae	0.04197	0.01872	0.1049	0.09533	0.3245	-0.2187	0.0928	-0.06293		g__norank_f__norank_o__SBR1031	0.01799	0.008994	0.01799	0.01799	1	-0.03224	0.03224	0
g__P3OB-42	0.1049	0.06122	0.04197	0.03159	0.1886	-0.0475	0.1734	0.06293		g__unclassified_f__Micromonosporaceae	0.005996	0.01039	0.02998	0.03745	0.3453	-0.08628	0.03832	-0.02398
g__Acidovorax	0.09594	0.1362	0.04797	0.03159	0.5843	-0.1762	0.2721	0.04797		g__Pedomicrobium	0.005996	0.005193	0.02998	0.02596	0.1917	-0.06642	0.01845	-0.02398
g__norank_f__Longimicrobiaceae	0.07495	0.02264	0.06596	0.01374	0.5879	-0.03346	0.05144	0.00899		g__norank_f__Saprospiraceae	0.008994	0.008994	0.02698	0.0238	0.2879	-0.05877	0.0228	-0.01799
g__Dyella	0.06896	0.02596	0.06896	0.03159	1	-0.06554	0.06554	0		g__norank_f__norank_o__norank_c__norank_p__RCP2-54	0.008994	0	0.02698	0.01558	0.1161	-0.04296	0.006988	-0.01799
g__Microbispora	0	0	0.1379	0.2389	0.3739	-0.5209	0.2451	-0.1379		g__norank_f__JG30-KF-CM45	0.008994	0.01558	0.02399	0.01872	0.3465	-0.05404	0.02404	-0.015
g__norank_f__norank_o__norank_c__Acidimicrobiia	0.08395	0.09187	0.05097	0.05783	0.6266	-0.141	0.207	0.03298		g__unclassified_f__Nostocaceae	0	0	0.03298	0.05712	0.3739	-0.1245	0.05858	-0.03298
g__ADurb.Bin063-1	0.1109	0.07858	0.02399	0.03405	0.1535	-0.05037	0.2242	0.08691		g__unclassified_f__Pseudonocardiaceae	0.01499	0.01374	0.01799	0.0238	0.8593	-0.04705	0.04105	-0.003
g__Taonella	0.03598	0.03921	0.09594	0.07214	0.2746	-0.1916	0.07166	-0.05996		g__Nocardioides	0.002998	0.005193	0.02998	0.02748	0.17	-0.07181	0.01785	-0.02698
g__unclassified_c__Bacteroidia	0.04797	0.02264	0.08395	0.09054	0.5409	-0.1856	0.1136	-0.03598		g__CL500-29_marine_group	0.002998	0.005193	0.02998	0.01374	0.03347	-0.05053	-0.003436	-0.02698
g__Pajaroellobacter	0.05996	0.08874	0.07196	0.03921	0.8409	-0.1675	0.1435	-0.012		g__MM2	0.008994	0	0.02099	0.03635	0.5983	-0.07026	0.04627	-0.012
g__norank_f__SM2D12	0.07495	0.09907	0.05397	0.01799	0.7364	-0.1404	0.1824	0.02098		g__Rhodomicrobium	0.01499	0.01872	0.01499	0.01872	1	-0.04244	0.04244	0
g__Hirschia	0.03598	0.03116	0.09294	0.02748	0.0764	-0.1236	0.009638	-0.05696		g__alphaI_cluster	0	0	0.02998	0.03159	0.1755	-0.08062	0.02066	-0.02998
g__norank_f__norank_o__Saccharimonadales	0.1019	0.06751	0.02698	0.0238	0.1439	-0.03983	0.1897	0.07492		g__Magnetospirillum	0.01799	0.01558	0.01199	0.005193	0.5614	-0.02033	0.03233	0.006
g__norank_f__norank_o__Babeliales	0.05397	0.07789	0.07196	0.06296	0.7713	-0.1785	0.1426	-0.01799		g__unclassified_f__Pseudomonadaceae	0.002998	0.005193	0.02698	0.03243	0.2746	-0.07663	0.02866	-0.02398
g__Massilia	0.09294	0.0687	0.02998	0.02891	0.2173	-0.05652	0.1824	0.06296		g__unclassified_f__Devosiaceae	0.002998	0.005193	0.02698	0.03243	0.2746	-0.07663	0.02866	-0.02398
g__norank_f__Sporomusaceae	0.06296	0.03243	0.05996	0.07326	0.9514	-0.1254	0.1314	0.003		g__norank_f__A0839	0.002998	0.005193	0.02399	0.02077	0.1648	-0.05531	0.01333	-0.02099
g__Paludibacter	0.07495	0.04437	0.04797	0.04251	0.4892	-0.07152	0.1255	0.02698		g__Nocardia	0.002998	0.005193	0.02399	0.02077	0.1648	-0.05531	0.01333	-0.02099
g__norank_f__Steroidobacteraceae	0.02099	0.01872	0.1019	0.03635	0.02656	-0.1465	-0.01537	-0.08091		g__norank_f__Longimicrobiaceae	0.002998	0.005193	0.02399	0.01039	0.03517	-0.03961	-0.002373	-0.02099
g__Roseiarcus	0.06596	0.03635	0.05397	0.0238	0.6575	-0.05766	0.08164	0.01199		g__Sulfuritalea	0.02099	0.01374	0.005996	0.01039	0.2062	-0.01262	0.04261	0.01499
g__norank_f__norank_o__AKIW659	0.06596	0.04616	0.05397	0.05008	0.7756	-0.09719	0.1212	0.01199		g__Massilia	0.005996	0.005193	0.02099	0.02077	0.292	-0.04931	0.01932	-0.01499
g__Rhizobacter	0.04497	0.03116	0.07196	0.0939	0.6613	-0.1856	0.1316	-0.02699		g__norank_f__Micropepsaceae	0.008994	0	0.01799	0.008994	0.1583	-0.02341	0.005421	-0.008996
g__norank_f__norank_o__Microtrichales	0.05696	0.03635	0.05996	0.03405	0.922	-0.08284	0.07684	-0.003		g__unclassified_o__Rhizobiales	0.008994	0.008994	0.01799	0.0238	0.5734	-0.04978	0.03179	-0.008996
g__unclassified_f__Microbacteriaceae	0.03298	0.01872	0.08095	0.05617	0.2332	-0.1429	0.04694	-0.04797		g__OLB13	0	0	0.02698	0.03243	0.223	-0.07896	0.025	-0.02698
g__norank_f__Vicinamibacteraceae	0.06296	0.07362	0.05097	0.02264	0.8007	-0.1115	0.1355	0.01199		g__Labrys	0	0	0.02399	0.01872	0.09073	-0.054	0.006018	-0.02399
g__norank_f__37-13	0.03898	0.05989	0.07495	0.0687	0.5317	-0.1821	0.1101	-0.03597		g__Rhodopseudomonas	0	0	0.02399	0.005193	0.001324	-0.03231	-0.01567	-0.02399
g__Magnetospirillum	0.05696	0.03745	0.05696	0.06122	1	-0.115	0.115	0		g__norank_f__67-14	0.002998	0.005193	0.02099	0.03635	0.4439	-0.07685	0.04087	-0.01799
g__norank_f__SC-I-84	0.02399	0.01872	0.08695	0.09867	0.3386	-0.2239	0.09803	-0.06296		g__IS-44	0.002998	0.005193	0.02099	0.02891	0.3486	-0.06508	0.02909	-0.01799
g__norank_f__Azospirillaceae	0.01199	0.005193	0.09894	0.04122	0.02226	-0.1535	-0.02035	-0.08695		g__unclassified_c__Gracilibacteria	0.02099	0.02264	0.002998	0.005193	0.2508	-0.01924	0.05523	0.01799
g__norank_f__norank_o__Elsterales	0.03898	0.02264	0.06596	0.06986	0.5591	-0.1447	0.09074	-0.02698		g__unclassified_f__Microbacteriaceae	0.005996	0.005193	0.01799	0.01558	0.2746	-0.03832	0.01433	-0.01199
g__TM7a	0.07795	0.08357	0.02698	0.03921	0.3931	-0.097	0.1989	0.05097		g__unclassified_c__Gammaproteobacteria	0.005996	0.005193	0.01799	0.01558	0.2746	-0.03832	0.01433	-0.01199
g__norank_f__Amb-16S-1323	0.02998	0.02891	0.07196	0.008994	0.07428	-0.09051	0.006553	-0.04198		g__unclassified_f__Burkholderiaceae	0.01499	0.02596	0.008994	0.008994	0.7247	-0.03804	0.05004	0.005996
g__norank_f__Microtrichaceae	0.06596	0.06986	0.03598	0.008994	0.5019	-0.08293	0.1429	0.02998		g__norank_f__norank_o__Saccharimonadales	0.008994	0.008994	0.01499	0.01872	0.6433	-0.03929	0.0273	-0.005996
g__norank_f__norank_o__Oligoflexales	0.05397	0.04759	0.04797	0.03405	0.8678	-0.0878	0.0998	0.006		g__Arenimonas	0.01199	0.01039	0.01199	0.01374	1	-0.02761	0.02761	0
g__norank_f__Paludibacteraceae	0.07495	0.07543	0.02698	0.03921	0.3837	-0.0883	0.1842	0.04797		g__Oscillochloris	0.01199	0.005193	0.01199	0.01039	1	-0.01862	0.01862	0
g__Clostridium_sensu_stricto_10	0.07495	0.09867	0.02399	0.03405	0.4453	-0.1164	0.2183	0.05096		g__Candidatus_Chloroploca	0	0	0.02099	0.02264	0.1836	-0.05728	0.0153	-0.02099
g__Luteolibacter	0.06896	0.01872	0.02998	0.02891	0.1216	-0.01623	0.09419	0.03898		g__Candidatus_Solibacter	0	0	0.02099	0.01872	0.1242	-0.051	0.009018	-0.02099
g__Defluviicoccus	0.05097	0.02891	0.04797	0.03159	0.9093	-0.06564	0.07164	0.003		g__norank_f__norank_o__norank_c__norank_p__FCPU426	0	0	0.02099	0.02077	0.155	-0.05428	0.0123	-0.02099
g__norank_f__norank_o__IMCC26256	0.02099	0.005193	0.07795	0.1273	0.4819	-0.2612	0.1473	-0.05696		g__norank_f__norank_o__Gaiellales	0	0	0.02099	0.01039	0.0249	-0.03764	-0.004335	-0.02099
g__Marmoricola	0.05696	0.04954	0.04197	0.02596	0.6666	-0.07466	0.1046	0.01499		g__Aquicella	0	0	0.02099	0.02077	0.155	-0.05428	0.0123	-0.02099
g__LD29	0.08095	0.06296	0.01499	0.005193	0.1448	-0.03531	0.1672	0.06596		g__Actinotalea	0.005996	0.01039	0.01499	0.01872	0.5072	-0.04331	0.02533	-0.008994
g__norank_f__norank_o__PeM15	0.02998	0.03159	0.06596	0.02264	0.1841	-0.09828	0.02632	-0.03598		g__norank_f__Ilumatobacteraceae	0.005996	0.01039	0.01499	0.01872	0.5072	-0.04331	0.02533	-0.008994
g__unclassified_c__Gammaproteobacteria	0.03898	0.02891	0.05397	0.05471	0.6963	-0.1142	0.0842	-0.01499		g__norank_f__Obscuribacteraceae	0.01499	0.01872	0.005996	0.005193	0.4676	-0.02215	0.04014	0.008994
g__norank_f__Nitrosomonadaceae	0.03598	0.01558	0.05696	0.0527	0.5445	-0.1091	0.06711	-0.02098		g__norank_f__norank_o__Armatimonadales	0.01199	0.01374	0.008994	0.008994	0.7676	-0.02333	0.02932	0.002996
g__Singulisphaera	0.05996	0.0663	0.03298	0.02077	0.538	-0.08439	0.1384	0.02698		g__Phaselicystis	0.01199	0.01039	0.008994	0.008994	0.7247	-0.01903	0.02502	0.002996
g__Aquabacterium	0	0	0.08695	0.06122	0.06971	-0.1851	0.01118	-0.08695		g__norank_f__Cyclobacteriaceae	0	0	0.01799	0.0238	0.2606	-0.05614	0.02016	-0.01799
g__Taibaiella	0.05996	0.04954	0.02698	0.01799	0.3394	-0.05151	0.1175	0.03298		g__Terrimicrobium	0	0	0.01799	0.01558	0.1161	-0.04296	0.006984	-0.01799
g__Labrys	0.04497	0.04122	0.03898	0.03635	0.8593	-0.08211	0.09409	0.00599		g__norank_f__norank_o__S085	0	0	0.01799	0.008994	0.02572	-0.03241	-0.003573	-0.01799
g__Geothrix	0.04197	0.01039	0.04197	0.03745	1	-0.0623	0.0623	0		g__norank_f__env.OPS_17	0	0	0.01799	0.008994	0.02572	-0.03241	-0.003573	-0.01799
g__Dechlorosoma	0.06596	0.05712	0.01499	0.01039	0.203	-0.04209	0.144	0.05097		g__Fluviicola	0	0	0.01799	0.0238	0.2606	-0.05614	0.02016	-0.01799
g__Methylovirgula	0.05097	0.02748	0.02998	0.02077	0.3508	-0.03423	0.07621	0.02099		g__norank_f__TRA3-20	0.002998	0.005193	0.01499	0.01374	0.2302	-0.03554	0.01155	-0.01199
g__Puia	0.03598	0.03116	0.04497	0.0238	0.7114	-0.07184	0.05386	-0.00899		g__Silvanigrella	0.002998	0.005193	0.01499	0.01872	0.3453	-0.04313	0.01915	-0.01199
g__Telmatospirillum	0.05097	0.03635	0.02698	0.0238	0.3931	-0.04566	0.09364	0.02399		g__Chitinimonas	0.002998	0.005193	0.01499	0.01039	0.1481	-0.03061	0.006627	-0.01199
g__Abditibacterium	0.05996	0.02264	0.01799	0.0238	0.09126	-0.01069	0.09463	0.04197		g__Aeromicrobium	0.002998	0.005193	0.01499	0.02596	0.4766	-0.05443	0.03045	-0.01199
g__Verrucomicrobium	0.05097	0.04954	0.02399	0.01374	0.4147	-0.05543	0.1094	0.02698		g__Amaricoccus	0.002998	0.005193	0.01499	0.01374	0.2302	-0.03554	0.01155	-0.01199
g__Actinoplanes	0.05397	0.06486	0.02099	0.02891	0.4663	-0.08085	0.1468	0.03298		g__norank_f__norank_o__R7C24	0.002998	0.005193	0.01499	0.005193	0.04742	-0.02376	-0.0002197	-0.01199
g__Pseudoxanthomonas	0.005996	0.005193	0.06896	0.04954	0.09375	-0.1428	0.01688	-0.06296		g__norank_f__cvE6	0.005996	0.01039	0.01199	0.01374	0.579	-0.03361	0.02162	-0.005994
g__Sumerlaea	0.008994	0.01558	0.06596	0.03635	0.06714	-0.1204	0.006429	-0.05697		g__Ancalomicrobium	0.005996	0.005193	0.01199	0.01039	0.4216	-0.02461	0.01263	-0.005994
g__Candidatus_Ovatusbacter	0	0	0.07495	0.1066	0.29	-0.2458	0.09593	-0.07495		g__norank_f__Caulobacteraceae	0.005996	0.005193	0.01199	0.005193	0.2302	-0.01777	0.005778	-0.005994
g__Niveispirillum	0.02399	0.03405	0.04797	0.07543	0.6421	-0.1566	0.1087	-0.02398		g__unclassified_o__Armatimonadales	0.005996	0.01039	0.01199	0.01374	0.579	-0.03361	0.02162	-0.005994
g__Terrimicrobium	0.02998	0.01039	0.04197	0.04251	0.6597	-0.08214	0.05816	-0.01199		g__unclassified_p__Proteobacteria	0.005996	0.01039	0.008994	0	0.6433	-0.01965	0.01366	-0.002998
g__Solirubrobacter	0.02998	0.01374	0.04197	0.02596	0.5185	-0.05907	0.03509	-0.01199		g__Luteolibacter	0	0	0.01499	0.01039	0.06677	-0.03164	0.001665	-0.01499
g__Nordella	0.02399	0.02077	0.04497	0.05471	0.5681	-0.1148	0.07283	-0.02098		g__unclassified_f__Pedosphaeraceae	0	0	0.01499	0.01872	0.2378	-0.045	0.01502	-0.01499
g__Anoxybacillus	0.03298	0.01872	0.03598	0.01799	0.8512	-0.04462	0.03862	-0.003		g__Pleomorphomonas	0.005996	0.005193	0.008994	0.01558	0.7676	-0.02932	0.02333	-0.002998
g__norank_f__norank_o__Zavarziniales	0.02099	0.01374	0.04497	0.03598	0.3414	-0.08572	0.03776	-0.02398		g__norank_f__norank_o__Acidobacteriales	0	0	0.01499	0.005193	0.00749	-0.02331	-0.006666	-0.01499
g__Nonomuraea	0.02099	0.005193	0.04497	0.04674	0.4269	-0.09936	0.0514	-0.02398		g__norank_f__norank_o__PLTA13	0	0	0.01499	0.01374	0.1318	-0.03701	0.007035	-0.01499
g__Fluviicola	0.01799	0.01799	0.04797	0.05193	0.3982	-0.1181	0.05812	-0.02998		g__Tychonema_CCAP_1459-11B	0	0	0.01499	0.01374	0.1318	-0.03701	0.007035	-0.01499
g__Enterobacter	0.01499	0.005193	0.04797	0.02748	0.1106	-0.07781	0.01185	-0.03298		g__norank_f__norank_o__norank_c__norank_p__Desulfobacterota	0.002998	0.005193	0.01199	0.01374	0.3486	-0.03254	0.01455	-0.008992
g__norank_f__Reyranellaceae	0.005996	0.01039	0.05696	0.06122	0.2282	-0.1505	0.04857	-0.05096		g__norank_f__Fimbriimonadaceae	0.002998	0.005193	0.01199	0.005193	0.1012	-0.02076	0.00278	-0.008992
g__Mitsuaria	0.02399	0.02596	0.03598	0.01799	0.5467	-0.06262	0.03864	-0.01199		g__unclassified_f__Gemmatimonadaceae	0.002998	0.005193	0.01199	0.01039	0.2508	-0.02761	0.009627	-0.008992
g__BIyi10	0.01799	0.03116	0.04197	0.03635	0.4345	-0.1007	0.05277	-0.02398		g__norank_f__norank_o__norank_c__vadinHA49	0.002998	0.005193	0.01199	0.02077	0.5072	-0.04331	0.02533	-0.008992
g__Roseimicrobium	0.04197	0.04527	0.01799	0.008994	0.419	-0.05001	0.09797	0.02398		g__CL500-3	0.002998	0.005193	0.01199	0.01374	0.3486	-0.03254	0.01455	-0.008992
g__Chitinimonas	0.05696	0.03635	0.002998	0.005193	0.0636	-0.004898	0.1128	0.05396		g__Sandaracinus	0.002998	0.005193	0.01199	0.02077	0.5072	-0.04331	0.02533	-0.008992
g__Acidipila	0.03298	0.03635	0.02399	0.005193	0.6932	-0.04987	0.06785	0.00899		g__Akkermansia	0.01199	0.01039	0.002998	0.005193	0.2508	-0.009627	0.02761	0.008992
g__Pseudoflavitalea	0.02399	0.01374	0.02998	0.04437	0.834	-0.08045	0.06847	-0.00599		g__Inquilinus	0.002998	0.005193	0.01199	0.01039	0.2508	-0.02761	0.009627	-0.008992
g__norank_f__Rhizobiales_Incertae_Sedis	0.03898	0.04056	0.01499	0.01374	0.3869	-0.04466	0.09264	0.02399		g__norank_f__Opitutaceae	0.002998	0.005193	0.01199	0.02077	0.5072	-0.04331	0.02533	-0.008992
g__unclassified_c__Lentisphaeria	0	0	0.05397	0.09347	0.3739	-0.2038	0.09586	-0.05397		g__norank_f__norank_o__norank_c__norank_p__NB1-j	0.01199	0.01374	0.002998	0.005193	0.3486	-0.01455	0.03254	0.008992
g__norank_f__Bacteroidetes_vadinHA17	0.03598	0.04759	0.01799	0.0238	0.5896	-0.0673	0.1033	0.01799		g__Candidatus_Paracaedibacter	0.002998	0.005193	0.008994	0.008994	0.3739	-0.02264	0.01065	-0.005996
g__Bordetella	0.03598	0.03921	0.01799	0.008994	0.4818	-0.0465	0.08248	0.01799		g__Subgroup_10	0.002998	0.005193	0.008994	0	0.1161	-0.01432	0.002328	-0.005996
g__unclassified_c__Actinobacteria	0.002998	0.005193	0.05097	0.08828	0.4006	-0.1897	0.09378	-0.04797		g__Iamia	0.002998	0.005193	0.008994	0.008994	0.3739	-0.02264	0.01065	-0.005996
g__unclassified_f__Micavibrionaceae	0.05097	0.04954	0.002998	0.005193	0.1706	-0.03187	0.1278	0.04797		g__Actinoallomurus	0.002998	0.005193	0.008994	0.008994	0.3739	-0.02264	0.01065	-0.005996
g__norank_f__norank_o__norank_c__OLB14	0.01199	0.01374	0.04197	0.06507	0.4785	-0.1366	0.07663	-0.02998		g__Bacteriovorax	0.002998	0.005193	0.008994	0.008994	0.3739	-0.02264	0.01065	-0.005996
g__unclassified_f__Lachnospiraceae	0.03898	0.02264	0.01199	0.005193	0.1145	-0.01024	0.06422	0.02699		g__unclassified_f__Caulobacteraceae	0.005996	0.005193	0.005996	0.005193	1	-0.01177	0.01177	0
g__Chryseobacterium	0.02998	0.02748	0.02099	0.01039	0.624	-0.0381	0.05608	0.00899		g__unclassified_o__Frankiales	0.002998	0.005193	0.008994	0.008994	0.3739	-0.02264	0.01065	-0.005996
g__norank_f__Vermiphilaceae	0	0	0.05097	0.08828	0.3739	-0.1925	0.09054	-0.05097		g__norank_f__Amb-16S-1323	0	0	0.01199	0.005193	0.01613	-0.02031	-0.003666	-0.01199
g__unclassified_c__Alphaproteobacteria	0.01199	0.005193	0.03898	0.05193	0.4211	-0.1106	0.05667	-0.02699		g__Niveispirillum	0	0	0.01199	0.01374	0.2051	-0.03401	0.01003	-0.01199
g__Xanthobacter	0.02399	0.02264	0.02698	0.03243	0.9019	-0.06639	0.06041	-0.00299		g__Prosthecobacter	0	0	0.01199	0.02077	0.3739	-0.04528	0.0213	-0.01199
g__Ferrovibrio	0.002998	0.005193	0.04797	0.04056	0.1295	-0.1105	0.02058	-0.04497		g__Ferruginibacter	0	0	0.01199	0.01374	0.2051	-0.03401	0.01003	-0.01199
g__norank_f__NS9_marine_group	0.005996	0.01039	0.04497	0.05617	0.3027	-0.1305	0.05259	-0.03897		g__norank_f__norank_o__Subgroup_7	0	0	0.01199	0.01039	0.1161	-0.02864	0.004665	-0.01199
g__Roseococcus	0.01799	0.01558	0.02998	0.04437	0.6815	-0.08737	0.06339	-0.01199		g__unclassified_f__Rhodanobacteraceae	0.01199	0.01374	0	0	0.2051	-0.01003	0.03401	0.01199
g__Paenibacillus	0.002998	0.005193	0.04497	0.0238	0.04055	-0.08102	-0.002923	-0.04197		g__Flavitalea	0	0	0.01199	0.01374	0.2051	-0.03401	0.01003	-0.01199
g__Ferruginibacter	0.005996	0.01039	0.04197	0.04056	0.2109	-0.1031	0.03114	-0.03597		g__BIyi10	0	0	0.01199	0.02077	0.3739	-0.04528	0.0213	-0.01199
g__Pandoraea	0.02399	0.01374	0.02099	0.01872	0.834	-0.03422	0.04022	0.003		g__norank_f__norank_o__Azospirillales	0	0	0.01199	0.005193	0.01613	-0.02031	-0.003666	-0.01199
g__norank_f__norank_o__Puniceispirillales	0.01199	0.01374	0.03298	0.01039	0.1024	-0.0486	0.006623	-0.02099		g__Kaistia	0	0	0.008994	0.008994	0.1583	-0.02341	0.005423	-0.008994
g__Methylophilus	0.01199	0.005193	0.03298	0.03635	0.3782	-0.07985	0.03787	-0.02099		g__Panacagrimonas	0	0	0.008994	0.008994	0.1583	-0.02341	0.005423	-0.008994
g__Microbacterium	0.01799	0.008994	0.02698	0.0238	0.5734	-0.04977	0.03179	-0.00899		g__Xanthobacter	0	0	0.008994	0.01558	0.3739	-0.03397	0.01598	-0.008994
g__norank_f__Caldilineaceae	0.01799	0.01799	0.02399	0.02264	0.7376	-0.05235	0.04035	-0.006		g__Tolypothrix	0	0	0.008994	0.008994	0.1583	-0.02341	0.005423	-0.008994
g__Flavitalea	0.01799	0.0238	0.02399	0.02596	0.7828	-0.06246	0.05046	-0.006		g__Dyadobacter	0	0	0.008994	0.008994	0.1583	-0.02341	0.005423	-0.008994
g__Geobacillus	0.01799	0.01558	0.02399	0.005193	0.5614	-0.03233	0.02033	-0.006		g__norank_f__Microbacteriaceae	0	0	0.008994	0.008994	0.1583	-0.02341	0.005423	-0.008994
g__norank_f__UBA12409	0.005996	0.005193	0.03598	0.03116	0.1755	-0.08062	0.02065	-0.02998		g__Kribbella	0.002998	0.005193	0.005996	0.01039	0.6779	-0.02162	0.01562	-0.002998
g__Clostridium_sensu_stricto_12	0.03598	0.05471	0.005996	0.01039	0.4039	-0.05928	0.1193	0.02998		g__norank_f__Moraxellaceae	0.005996	0.01039	0.002998	0.005193	0.6779	-0.01562	0.02162	0.002998
g__unclassified_f__Opitutaceae	0.02998	0.005193	0.01199	0.005193	0.01324	0.006218	0.02976	0.01799		g__norank_f__norank_o__Rokubacteriales	0.002998	0.005193	0.005996	0.01039	0.6779	-0.02162	0.01562	-0.002998
g__norank_f__Christensenellaceae	0.01499	0.005193	0.02399	0.03405	0.6745	-0.06421	0.04621	-0.009		g__Desulfobacterium_catecholicum_group	0.002998	0.005193	0.005996	0.01039	0.6779	-0.02162	0.01562	-0.002998
g__norank_f__norank_o__norank_c__vadinHA49	0.02099	0.01872	0.01799	0.0238	0.8722	-0.04554	0.05154	0.003		g__Stenotrophobacter	0.002998	0.005193	0.005996	0.005193	0.5185	-0.01477	0.008774	-0.002998
g__Flavisolibacter	0.02099	0.01374	0.01799	0.008994	0.7676	-0.02332	0.02932	0.003		g__Treponema	0.005996	0.005193	0.002998	0.005193	0.5185	-0.008774	0.01477	0.002998
g__Stenotrophomonas	0.02399	0.02596	0.01499	0.01872	0.652	-0.0423	0.0603	0.009		g__Burkholderia-Caballeronia-Paraburkholderia	0.005996	0.005193	0.002998	0.005193	0.5185	-0.008774	0.01477	0.002998
g__Sphingopyxis	0.03598	0.03116	0.002998	0.005193	0.1448	-0.01766	0.08362	0.03298		g__Rhodovastum	0.002998	0.005193	0.005996	0.01039	0.6779	-0.02162	0.01562	-0.002998
g__Candidatus_Accumulibacter	0.03298	0.04954	0.005996	0.005193	0.4012	-0.05286	0.1068	0.02698		g__norank_f__Kineosporiaceae	0.002998	0.005193	0.005996	0.005193	0.5185	-0.01477	0.008774	-0.002998
g__unclassified_f__Chthoniobacteraceae	0.03298	0.01039	0.005996	0.01039	0.03347	0.00343	0.05054	0.02698		g__Candidatus_Alysiosphaera	0	0	0.005996	0.01039	0.3739	-0.02265	0.01066	-0.005996
g__norank_f__Gemmataceae	0.02998	0.05193	0.008994	0.008994	0.5283	-0.0635	0.1055	0.02099		g__norank_f__norank_o__Elsterales	0	0	0.005996	0.005193	0.1161	-0.01432	0.002328	-0.005996
g__norank_f__norank_o__Micavibrionales	0.01199	0.01039	0.02698	0.02698	0.4199	-0.06133	0.03135	-0.01499		g__norank_f__Hydrogenedensaceae	0	0	0.005996	0.005193	0.1161	-0.01432	0.002328	-0.005996
g__Ilumatobacter	0.01199	0.01039	0.02698	0.03921	0.5569	-0.08001	0.05003	-0.01499		g__norank_f__norank_o__norank_c__norank_p__WS4	0	0	0.005996	0.01039	0.3739	-0.02265	0.01066	-0.005996
g__Desulfobulbus	0.03598	0.03243	0	0	0.127	-0.016	0.08796	0.03598		g__WCHB1-32	0	0	0.005996	0.005193	0.1161	-0.01432	0.002328	-0.005996
g__Acidibacter	0.01799	0.0238	0.01799	0.01558	1	-0.0456	0.0456	0		g__Taonella	0.002998	0.005193	0.002998	0.005193	1	-0.01177	0.01177	0
g__unclassified_c__Clostridia	0.02099	0.01039	0.01499	0.01872	0.653	-0.02832	0.04032	0.006		g__Roseiarcus	0	0	0.005996	0.005193	0.1161	-0.01432	0.002328	-0.005996
g__norank_f__norank_o__Gaiellales	0.02099	0.01872	0.01499	0.01872	0.7149	-0.03644	0.04844	0.006		g__norank_f__norank_o__norank_c__Negativicutes	0.002998	0.005193	0.002998	0.005193	1	-0.01177	0.01177	0
g__Aquisphaera	0.02099	0.03635	0.01499	0.01039	0.7971	-0.0546	0.0666	0.006		g__norank_f__KF-JG30-B3	0	0	0.005996	0.005193	0.1161	-0.01432	0.002328	-0.005996
g__Pedosphaera	0.002998	0.005193	0.03298	0.04954	0.356	-0.1098	0.04986	-0.02998		g__Bacillus	0	0	0.005996	0.01039	0.3739	-0.02265	0.01066	-0.005996
g__SM1A02	0.002998	0.005193	0.03298	0.05712	0.4165	-0.1219	0.06196	-0.02998		g__Dechlorosoma	0	0	0.005996	0.005193	0.1161	-0.01432	0.002328	-0.005996
g__norank_f__Hydrogenedensaceae	0.02698	0.02698	0.008994	0.008994	0.3349	-0.0276	0.06357	0.01799		g__norank_f__Paracaedibacteraceae	0	0	0.005996	0.01039	0.3739	-0.02265	0.01066	-0.005996
g__unclassified_f__Sporomusaceae	0.008994	0.008994	0.02698	0.02698	0.3349	-0.06357	0.0276	-0.01799		g__norank_f__D05-2	0.005996	0.01039	0	0	0.3739	-0.01066	0.02265	0.005996
g__norank_f__norank_o__RBG-13-54-9	0.02399	0.04154	0.008994	0.01558	0.5898	-0.05612	0.08611	0.015		g__norank_f__norank_o__norank_c__Acidimicrobiia	0.002998	0.005193	0.002998	0.005193	1	-0.01177	0.01177	0
g__norank_f__Spirochaetaceae	0	0	0.03298	0.05712	0.3739	-0.1245	0.05858	-0.03298		g__norank_f__norank_o__norank_c__OM190	0.002998	0.005193	0.002998	0.005193	1	-0.01177	0.01177	0
g__norank_f__KF-JG30-B3	0	0	0.03298	0.04954	0.3131	-0.1124	0.04643	-0.03298		g__Sediminibacterium	0	0	0.005996	0.01039	0.3739	-0.02265	0.01066	-0.005996
g__Legionella	0.02099	0.02077	0.01199	0.01374	0.5655	-0.03092	0.04892	0.009		g__Labilithrix	0	0	0.005996	0.01039	0.3739	-0.02265	0.01066	-0.005996
g__Granulicella	0.01499	0.01374	0.01799	0.0238	0.8593	-0.04705	0.04105	-0.003		g__norank_f__norank_o__Rhizobiales	0.002998	0.005193	0.002998	0.005193	1	-0.01177	0.01177	0
g__norank_f__Spirosomaceae	0.02998	0.05193	0.002998	0.005193	0.4211	-0.05668	0.1106	0.02698		g__norank_f__Chitinophagaceae	0.002998	0.005193	0.002998	0.005193	1	-0.01177	0.01177	0
g__Aquicella	0.005996	0.01039	0.02698	0.03243	0.3459	-0.07557	0.0336	-0.02098		g__norank_f__norank_o__norank_c__norank_p__SAR324_cladeMarine_group_B	0	0	0.005996	0.005193	0.1161	-0.01432	0.002328	-0.005996
g__Thermoactinomyces	0.005996	0.005193	0.02399	0.01039	0.05504	-0.03661	0.0006254	-0.01799		g__norank_f__Geobacteraceae	0.002998	0.005193	0.002998	0.005193	1	-0.01177	0.01177	0
g__Solimonas	0.02099	0.01374	0.008994	0.008994	0.2746	-0.01433	0.03832	0.012		g__Agromyces	0	0	0.005996	0.005193	0.1161	-0.01432	0.002328	-0.005996
g__Roseisolibacter	0.01199	0.01374	0.01799	0.008994	0.5614	-0.03232	0.02032	-0.006		g__Solirubrobacter	0	0	0.005996	0.01039	0.3739	-0.02265	0.01066	-0.005996
g__Clostridium_sensu_stricto_13	0.02998	0.02596	0	0	0.1161	-0.01163	0.07159	0.02998		g__norank_f__norank_o__mle1-27	0	0	0.005996	0.01039	0.3739	-0.02265	0.01066	-0.005996
g__Candidatus_Finniella	0	0	0.02998	0.05193	0.3739	-0.1132	0.05326	-0.02998		g__norank_f__norank_o__SM1A07	0	0	0.005996	0.01039	0.3739	-0.02265	0.01066	-0.005996
g__norank_f__Sphingobacteriaceae	0.01199	0.02077	0.01799	0.01799	0.7247	-0.05005	0.03805	-0.006		g__norank_f__Anaerolineaceae	0.002998	0.005193	0.002998	0.005193	1	-0.01177	0.01177	0
g__alphaI_cluster	0.01499	0.01374	0.01499	0.01872	1	-0.03722	0.03722	0		g__norank_f__NS9_marine_group	0.005996	0.01039	0	0	0.3739	-0.01066	0.02265	0.005996
g__norank_f__Thermomonosporaceae	0.002998	0.005193	0.02399	0.03405	0.3508	-0.0762	0.03422	-0.02099		g__norank_f__norank_o__RBG-13-54-9	0	0	0.005996	0.01039	0.3739	-0.02265	0.01066	-0.005996
g__norank_f__Eubacterium_coprostanoligenes_group	0.02099	0.005193	0.005996	0.005193	0.02411	0.003222	0.02677	0.01499		g__unclassified_f__Oxalobacteraceae	0.002998	0.005193	0.002998	0.005193	1	-0.01177	0.01177	0
g__Labilithrix	0.008994	0.01558	0.01799	0.03116	0.6779	-0.06484	0.04685	-0.008996		g__Lacibacter	0.002998	0.005193	0.002998	0.005193	1	-0.01177	0.01177	0
g__norank_f__norank_o__norank_c__JG30-KF-CM66	0	0	0.02698	0.0238	0.121	-0.06513	0.01117	-0.02698		g__norank_f__Rhodospirillaceae	0.002998	0.005193	0.002998	0.005193	1	-0.01177	0.01177	0
g__unclassified_p__Armatimonadota	0.01499	0.01374	0.01199	0.01374	0.8025	-0.02815	0.03415	0.003		g__norank_f__norank_o__IMCC26256	0.002998	0.005193	0.002998	0.005193	1	-0.01177	0.01177	0
g__Acidisoma	0.01499	0.01374	0.01199	0.005193	0.7415	-0.02055	0.02655	0.003		g__Chthoniobacter	0.002998	0.005193	0.002998	0.005193	1	-0.01177	0.01177	0
g__norank_f__unclassified	0	0	0.02399	0.03405	0.2895	-0.07857	0.03059	-0.02399		g__Microbispora	0.005996	0.005193	0	0	0.1161	-0.002328	0.01432	0.005996
g__norank_f__norank_o__Gastranaerophilales	0.02099	0.02891	0.002998	0.005193	0.3486	-0.02909	0.06508	0.01799		g__Roseimicrobium	0	0	0.005996	0.005193	0.1161	-0.01432	0.002328	-0.005996
g__Curvibacter	0.02099	0.01374	0.002998	0.005193	0.1012	-0.005554	0.04154	0.01799		g__Cystobacter	0	0	0.005996	0.01039	0.3739	-0.02265	0.01066	-0.005996
g__Minicystis	0.002998	0.005193	0.02099	0.02264	0.2508	-0.05523	0.01924	-0.01799		g__norank_f__norank_o__norank_c__OLB14	0	0	0.002998	0.005193	0.3739	-0.01132	0.005326	-0.002998
g__norank_f__norank_o__Chthonomonadales	0.005996	0.005193	0.01799	0.03116	0.5467	-0.06263	0.03864	-0.01199		g__Dyella	0.002998	0.005193	0	0	0.3739	-0.005326	0.01132	0.002998
g__norank_f__Obscuribacteraceae	0.005996	0.01039	0.01799	0.0238	0.4685	-0.05362	0.02963	-0.01199		g__norank_f__Holophagaceae	0.002998	0.005193	0	0	0.3739	-0.005326	0.01132	0.002998
g__Deinococcus	0.005996	0.005193	0.01799	0	0.01613	-0.02032	-0.00367	-0.01199		g__norank_f__norank_o__Kapabacteriales	0	0	0.002998	0.005193	0.3739	-0.01132	0.005326	-0.002998
g__norank_f__Magnetospirillaceae	0.008994	0.01558	0.01499	0.01872	0.6918	-0.04504	0.03304	-0.005996		g__unclassified_f__Acidobacteriaceae_Subgroup_1	0.002998	0.005193	0	0	0.3739	-0.005326	0.01132	0.002998
g__Lachnoclostridium	0.01499	0.01039	0.008994	0.008994	0.4918	-0.01603	0.02802	0.005996		g__Edaphobacter	0	0	0.002998	0.005193	0.3739	-0.01132	0.005326	-0.002998
g__Microlunatus	0.01499	0.01872	0.008994	0.008994	0.6433	-0.0273	0.03929	0.005996		g__norank_f__NS11-12_marine_group	0	0	0.002998	0.005193	0.3739	-0.01132	0.005326	-0.002998
g__Zoogloea	0.01199	0.005193	0.01199	0.01039	1	-0.01862	0.01862	0		g__unclassified_o__Entomoplasmatales	0.002998	0.005193	0	0	0.3739	-0.005326	0.01132	0.002998
g__Delftia	0.01199	0.005193	0.01199	0.01374	1	-0.02355	0.02355	0		g__Ellin6067	0	0	0.002998	0.005193	0.3739	-0.01132	0.005326	-0.002998
g__Cohnella	0.01199	0.02077	0.01199	0.01039	1	-0.03723	0.03723	0		g__Chryseobacterium	0	0	0.002998	0.005193	0.3739	-0.01132	0.005326	-0.002998
g__unclassified_f__Streptosporangiaceae	0.02099	0.02891	0	0	0.2771	-0.02535	0.06733	0.02099		g__Pseudonocardia	0	0	0.002998	0.005193	0.3739	-0.01132	0.005326	-0.002998
g__norank_f__Pleomorphomonadaceae	0	0	0.02099	0.02891	0.2771	-0.06733	0.02535	-0.02099		g__Rhodococcus	0.002998	0.005193	0	0	0.3739	-0.005326	0.01132	0.002998
g__norank_f__norank_o__Vampirovibrionales	0	0	0.02099	0.02264	0.1836	-0.05728	0.0153	-0.02099		g__Clostridium_sensu_stricto_10	0	0	0.002998	0.005193	0.3739	-0.01132	0.005326	-0.002998
g__norank_f__Microscillaceae	0	0	0.02099	0.03635	0.3739	-0.07926	0.03728	-0.02099		g__norank_f__Azospirillaceae	0	0	0.002998	0.005193	0.3739	-0.01132	0.005326	-0.002998
g__Cupriavidus	0.002998	0.005193	0.01799	0.008994	0.06677	-0.03164	0.001656	-0.01499		g__unclassified_f__Rickettsiaceae	0	0	0.002998	0.005193	0.3739	-0.01132	0.005326	-0.002998
g__Cytophaga	0.002998	0.005193	0.01799	0.01799	0.2378	-0.04501	0.01502	-0.01499		g__unclassified_f__Silvanigrellaceae	0	0	0.002998	0.005193	0.3739	-0.01132	0.005326	-0.002998
g__Desulfosporosinus	0.005996	0.01039	0.01499	0.01374	0.4169	-0.03661	0.01862	-0.008994		g__Methylocystis	0.002998	0.005193	0	0	0.3739	-0.005326	0.01132	0.002998
g__norank_f__norank_o__Rhizobiales	0.008994	0.008994	0.01199	0.01039	0.7247	-0.02502	0.01903	-0.002996		g__norank_f__Microtrichaceae	0	0	0.002998	0.005193	0.3739	-0.01132	0.005326	-0.002998
g__norank_f__norank_o__Veillonellales-Selenomonadales	0.01199	0.01039	0.008994	0.01558	0.7953	-0.02702	0.03301	0.002996		g__Desulfobulbus	0	0	0.002998	0.005193	0.3739	-0.01132	0.005326	-0.002998
g__norank_f__norank_o__PLTA13	0.01199	0.01374	0.008994	0.008994	0.7676	-0.02333	0.02932	0.002996		g__Marmoricola	0	0	0.002998	0.005193	0.3739	-0.01132	0.005326	-0.002998
g__unclassified_f__Oscillospiraceae	0.01499	0.01872	0.002998	0.005193	0.3453	-0.01915	0.04313	0.01199		g__norank_f__norank_o__norank_c__Parcubacteria	0.002998	0.005193	0	0	0.3739	-0.005326	0.01132	0.002998
g__norank_f__Paracaedibacteraceae	0.008994	0.01558	0.008994	0.008994	1	-0.02884	0.02884	0		g__norank_f__norank_o__Defluviicoccales	0.002998	0.005193	0	0	0.3739	-0.005326	0.01132	0.002998
g__Conexibacter	0.008994	0.008994	0.008994	0.008994	1	-0.02039	0.02039	0		g__Clostridium_sensu_stricto_8	0	0	0.002998	0.005193	0.3739	-0.01132	0.005326	-0.002998
g__Heliimonas	0.005996	0.01039	0.01199	0.02077	0.6779	-0.04322	0.03123	-0.005994		g__Anaerovorax	0.002998	0.005193	0	0	0.3739	-0.005326	0.01132	0.002998
g__unclassified_f__Fimbriimonadaceae	0	0	0.01499	0.02596	0.3739	-0.0566	0.02662	-0.01499		g__Ellin516	0	0	0.002998	0.005193	0.3739	-0.01132	0.005326	-0.002998
g__norank_f__D05-2	0.005996	0.01039	0.008994	0.01558	0.7953	-0.03302	0.02702	-0.002998		g__Conexibacter	0.002998	0.005193	0	0	0.3739	-0.005326	0.01132	0.002998
g__norank_f__norank_o__PAUC26f	0	0	0.01499	0.01872	0.2378	-0.045	0.01502	-0.01499		g__unclassified_o__Rickettsiales	0.002998	0.005193	0	0	0.3739	-0.005326	0.01132	0.002998
g__Vulgatibacter	0.01199	0.005193	0.002998	0.005193	0.1012	-0.00278	0.02076	0.008992		g__norank_f__norank_o__Thalassobaculales	0	0	0.002998	0.005193	0.3739	-0.01132	0.005326	-0.002998
g__Nevskia	0.01199	0.02077	0.002998	0.005193	0.5072	-0.02533	0.04331	0.008992		g__Pajaroellobacter	0	0	0.002998	0.005193	0.3739	-0.01132	0.005326	-0.002998
g__Haoranjiania	0.002998	0.005193	0.01199	0.02077	0.5072	-0.04331	0.02533	-0.008992		g__Roseomonas	0	0	0.002998	0.005193	0.3739	-0.01132	0.005326	-0.002998
g__norank_f__Acidobacteriaceae_Subgroup_1	0.002998	0.005193	0.01199	0.01374	0.3486	-0.03254	0.01455	-0.008992		g__Arcticibacter	0.002998	0.005193	0	0	0.3739	-0.005326	0.01132	0.002998
g__Pseudarcobacter	0.002998	0.005193	0.01199	0.02077	0.5072	-0.04331	0.02533	-0.008992		g__norank_f__Beijerinckiaceae	0	0	0.002998	0.005193	0.3739	-0.01132	0.005326	-0.002998
g__IMCC26207	0.002998	0.005193	0.01199	0.01374	0.3486	-0.03254	0.01455	-0.008992		g__norank_f__norank_o__norank_c__norank_p__WPS-2	0	0	0.002998	0.005193	0.3739	-0.01132	0.005326	-0.002998
g__Roseomonas	0.002998	0.005193	0.01199	0.005193	0.1012	-0.02076	0.00278	-0.008992		g__TM7a	0.002998	0.005193	0	0	0.3739	-0.005326	0.01132	0.002998
g__unclassified_o__Rhizobiales	0.002998	0.005193	0.01199	0.01374	0.3486	-0.03254	0.01455	-0.008992		g__norank_f__Holosporaceae	0.002998	0.005193	0	0	0.3739	-0.005326	0.01132	0.002998
g__Panacagrimonas	0.008994	0.008994	0.002998	0.005193	0.3739	-0.01065	0.02264	0.005996		g__norank_f__DEV007	0	0	0.002998	0.005193	0.3739	-0.01132	0.005326	-0.002998
g__Steroidobacter	0.005996	0.01039	0.005996	0.005193	1	-0.01862	0.01862	0		g__norank_f__SC-I-84	0.002998	0.005193	0	0	0.3739	-0.005326	0.01132	0.002998
g__norank_f__norank_o__JTB23	0.005996	0.01039	0.005996	0.005193	1	-0.01862	0.01862	0
g__norank_f__norank_o__Defluviicoccales	0.005996	0.005193	0.005996	0.005193	1	-0.01177	0.01177	0
g__norank_f__norank_o__norank_c__norank_p__SAR324_cladeMarine_group_B	0.002998	0.005193	0.008994	0.01558	0.5614	-0.03232	0.02033	-0.005996
g__Blastocatella	0.005996	0.01039	0.005996	0.01039	1	-0.02355	0.02355	0
g__unclassified_f__Blastocatellaceae	0.008994	0.008994	0.002998	0.005193	0.3739	-0.01065	0.02264	0.005996
g__unclassified_o__Frankiales	0.002998	0.005193	0.008994	0.008994	0.3739	-0.02264	0.01065	-0.005996
g__unclassified_f__Pedosphaeraceae	0.01199	0.02077	0	0	0.3739	-0.0213	0.04528	0.01199
g__MND1	0	0	0.01199	0.02077	0.3739	-0.04528	0.0213	-0.01199
g__Anaerocolumna	0	0	0.01199	0.01039	0.1161	-0.02864	0.004665	-0.01199
g__norank_f__Isosphaeraceae	0	0	0.008994	0.01558	0.3739	-0.03397	0.01598	-0.008994
g__Peredibacter	0	0	0.008994	0.01558	0.3739	-0.03397	0.01598	-0.008994
g__Acidothermus	0.008994	0.01558	0	0	0.3739	-0.01598	0.03397	0.008994
g__unclassified_o__Chlamydiales	0	0	0.008994	0.008994	0.1583	-0.02341	0.005423	-0.008994
g__Pseudonocardia	0.008994	0.008994	0	0	0.1583	-0.005423	0.02341	0.008994
g__Perlucidibaca	0	0	0.008994	0.01558	0.3739	-0.03397	0.01598	-0.008994
g__norank_f__DEV007	0.008994	0.01558	0	0	0.3739	-0.01598	0.03397	0.008994
g__Rhodococcus	0.005996	0.01039	0.002998	0.005193	0.6779	-0.01562	0.02162	0.002998
g__Salinispira	0.005996	0.01039	0.002998	0.005193	0.6779	-0.01562	0.02162	0.002998
g__JCM_18997	0.002998	0.005193	0.005996	0.005193	0.5185	-0.01477	0.008774	-0.002998
g__norank_f__norank_o__mle1-27	0.005996	0.01039	0.002998	0.005193	0.6779	-0.01562	0.02162	0.002998
g__Luteibacter	0.005996	0.005193	0.002998	0.005193	0.5185	-0.008774	0.01477	0.002998
g__Aeromicrobium	0.002998	0.005193	0.005996	0.005193	0.5185	-0.01477	0.008774	-0.002998
g__Aetherobacter	0	0	0.005996	0.01039	0.3739	-0.02265	0.01066	-0.005996
g__Candidatus_Paracaedibacter	0.002998	0.005193	0.002998	0.005193	1	-0.01177	0.01177	0
g__Fonticella	0	0	0.005996	0.01039	0.3739	-0.02265	0.01066	-0.005996
g__norank_f__norank_o__Subgroup_2	0.002998	0.005193	0.002998	0.005193	1	-0.01177	0.01177	0
g__norank_f__Phycisphaeraceae	0.005996	0.005193	0	0	0.1161	-0.002328	0.01432	0.005996
g__Psychroglaciecola	0.005996	0.005193	0	0	0.1161	-0.002328	0.01432	0.005996
g__Ellin6067	0.002998	0.005193	0.002998	0.005193	1	-0.01177	0.01177	0
g__RS25G	0	0	0.005996	0.01039	0.3739	-0.02265	0.01066	-0.005996
g__unclassified_f__Thermacetogeniaceae	0.002998	0.005193	0.002998	0.005193	1	-0.01177	0.01177	0
g__Spirochaeta_2	0.002998	0.005193	0.002998	0.005193	1	-0.01177	0.01177	0
g__norank_f__A0839	0.002998	0.005193	0.002998	0.005193	1	-0.01177	0.01177	0
g__Methylobacillus	0	0	0.005996	0.01039	0.3739	-0.02265	0.01066	-0.005996
g__norank_f__bac2nit3	0.002998	0.005193	0.002998	0.005193	1	-0.01177	0.01177	0
g__Caproiciproducens	0	0	0.005996	0.01039	0.3739	-0.02265	0.01066	-0.005996
g__Acinetobacter	0.002998	0.005193	0.002998	0.005193	1	-0.01177	0.01177	0
g__Inhella	0	0	0.005996	0.005193	0.1161	-0.01432	0.002328	-0.005996
g__Candidatus_Xiphinematobacter	0	0	0.005996	0.01039	0.3739	-0.02265	0.01066	-0.005996
g__Cystobacter	0	0	0.005996	0.005193	0.1161	-0.01432	0.002328	-0.005996
g__Escherichia-Shigella	0.002998	0.005193	0.002998	0.005193	1	-0.01177	0.01177	0
g__Microvirga	0.005996	0.005193	0	0	0.1161	-0.002328	0.01432	0.005996
g__norank_f__norank_o__SM1A07	0.005996	0.005193	0	0	0.1161	-0.002328	0.01432	0.005996
g__Clostridium_sensu_stricto_8	0.002998	0.005193	0.002998	0.005193	1	-0.01177	0.01177	0
g__Oligoflexus	0	0	0.005996	0.01039	0.3739	-0.02265	0.01066	-0.005996
g__Candidatus_Nitrotoga	0	0	0.005996	0.01039	0.3739	-0.02265	0.01066	-0.005996
g__norank_f__norank_o__CCD24	0	0	0.005996	0.01039	0.3739	-0.02265	0.01066	-0.005996
g__norank_f__norank_o__C0119	0.002998	0.005193	0.002998	0.005193	1	-0.01177	0.01177	0
g__norank_f__Holosporaceae	0.002998	0.005193	0.002998	0.005193	1	-0.01177	0.01177	0
g__norank_f__norank_o__R7C24	0	0	0.005996	0.01039	0.3739	-0.02265	0.01066	-0.005996
g__norank_f__norank_o__Chitinophagales	0.005996	0.01039	0	0	0.3739	-0.01066	0.02265	0.005996
g__Paracoccus	0.002998	0.005193	0.002998	0.005193	1	-0.01177	0.01177	0
g__Tundrisphaera	0.002998	0.005193	0	0	0.3739	-0.005326	0.01132	0.002998
g__unclassified_o__Ignavibacteriales	0.002998	0.005193	0	0	0.3739	-0.005326	0.01132	0.002998
g__Nitrospira	0.002998	0.005193	0	0	0.3739	-0.005326	0.01132	0.002998
g__unclassified_o__Acidobacteriales	0.002998	0.005193	0	0	0.3739	-0.005326	0.01132	0.002998
g__norank_f__BSV40	0	0	0.002998	0.005193	0.3739	-0.01132	0.005326	-0.002998
g__Chryseolinea	0.002998	0.005193	0	0	0.3739	-0.005326	0.01132	0.002998
g__Caldanaerobius	0	0	0.002998	0.005193	0.3739	-0.01132	0.005326	-0.002998
g__norank_f__norank_o__norank_c__Gammaproteobacteria	0	0	0.002998	0.005193	0.3739	-0.01132	0.005326	-0.002998
g__IMCC26134	0	0	0.002998	0.005193	0.3739	-0.01132	0.005326	-0.002998
g__Azohydromonas	0.002998	0.005193	0	0	0.3739	-0.005326	0.01132	0.002998
g__norank_f__norank_o__Armatimonadales	0	0	0.002998	0.005193	0.3739	-0.01132	0.005326	-0.002998
g__norank_f__Hungateiclostridiaceae	0.002998	0.005193	0	0	0.3739	-0.005326	0.01132	0.002998
g__norank_f__Solimonadaceae	0	0	0.002998	0.005193	0.3739	-0.01132	0.005326	-0.002998
g__DEV008	0.002998	0.005193	0	0	0.3739	-0.005326	0.01132	0.002998
g__norank_f__norank_o__Ignavibacteriales	0	0	0.002998	0.005193	0.3739	-0.01132	0.005326	-0.002998
g__norank_f__norank_o__F9P41300-M23	0	0	0.002998	0.005193	0.3739	-0.01132	0.005326	-0.002998
g__Chthonomonas	0	0	0.002998	0.005193	0.3739	-0.01132	0.005326	-0.002998
g__norank_f__BSV26	0.002998	0.005193	0	0	0.3739	-0.005326	0.01132	0.002998
g__Thermus	0.002998	0.005193	0	0	0.3739	-0.005326	0.01132	0.002998
g__norank_f__Opitutaceae	0.002998	0.005193	0	0	0.3739	-0.005326	0.01132	0.002998
