# Supplementary material for: Bacillus paralicheniformis RP01 Enhances the Expression of Growth-Related Genes in Cotton and Promotes Plant Growth by Altering Microbiota inside and outside the Root
Source: Int J Mol Sci. 2023 Apr 13;24(8):7227. doi: 10.3390/ijms24087227 (PMC10138817; doi:10.3390/ijms24087227)
Supplement: Supplementary file 1 [file ijms-24-07227-s001.zip › Supplementary file Table S5.xlsx]

## Sheet: Supplementary file Table S5
Table S5: Gene annotations blasted in 6 major databases (NR, Swiss-Prot, Pfam, EggNOG, GO and KEGG)
(A.) Gene count statistics for six databases.
Sample Name	NR	Swiss-Prot	Pfam	COG	GO	KEGG
RP01	4216	3773	3741	3462	2302	2579
(B.) Gene detail tables summarized from six databases.
Gene ID	Gene Name	Gene Description	Sample Name	Location	Sequence Type	Strand	Start	End	Length (bp)	NR Description	Swiss-Prot Description	Pfam ID	Domain	Domain Description	COG ID	COG Description	GO ID	GO Description	KO ID	KO Description	Enzyme	Enzyme description
gene0001	dnaA	MULTISPECIES: chromosomal replication initiator protein DnaA	RP01	Chromosome	Chromosome	+	1	1341	1341	MULTISPECIES: chromosomal replication initiator protein DnaA	RecName: Full=Chromosomal replication initiator protein DnaA [Bacillus licheniformis DSM 13 = ATCC 14580]	PF00308;PF08299;PF11638;PF01695;PF00004	Bac_DnaA;Bac_DnaA_C;DnaA_N;IstB_IS21;AAA	Bacterial dnaA protein;Bacterial dnaA protein helix-turn-helix;DnaA N-terminal domain;IstB-like ATP binding protein;ATPase family associated with various cellular activities (AAA)	COG0593	Chromosomal replication initiation ATPase DnaA	GO:0006270;GO:0006275;GO:0005737;GO:0005524;GO:0003688	DNA replication initiation;;regulation of DNA replication;;cytoplasm;;ATP binding;;DNA replication origin binding	K02313	chromosomal replication initiator protein	-	-
gene0002	dnaN	MULTISPECIES: DNA polymerase III subunit beta	RP01	Chromosome	Chromosome	+	1519	2655	1137	MULTISPECIES: DNA polymerase III subunit beta	RecName: Full=Beta sliding clamp; Short=Beta clamp; Short=Sliding clamp; AltName: Full=Beta-clamp processivity factor; AltName: Full=DNA polymerase III beta sliding clamp subunit; AltName: Full=DNA polymerase III subunit beta [Bacillus subtilis subsp. subtilis str. 168]	PF00712;PF00712;PF02767;PF02768	DNA_pol3_beta;DNA_pol3_beta;DNA_pol3_beta_2;DNA_pol3_beta_3	DNA polymerase III beta subunit, N-terminal domain;DNA polymerase III beta subunit, N-terminal domain;DNA polymerase III beta subunit, central domain;DNA polymerase III beta subunit, C-terminal domain	COG0592	DNA polymerase III sliding clamp (beta) subunit, PCNA homolog	GO:0006260;GO:0005737;GO:0009360;GO:0003677;GO:0003887;GO:0008408	DNA replication;;cytoplasm;;DNA polymerase III complex;;DNA binding;;DNA-directed DNA polymerase activity;;3'-5' exonuclease activity	K02338	DNA polymerase III subunit beta [EC:2.7.7.7]	2.7.7.7	Transferases; Transferring phosphorus-containing groups; Nucleotidyltransferases; 2'-deoxyribonucleoside-5'-triphosphate:DNA deoxynucleotidyltransferase (DNA-directed)
gene0003	ybcJ	MULTISPECIES: S4 domain-containing protein YaaA	RP01	Chromosome	Chromosome	+	2822	3037	216	MULTISPECIES: S4 domain-containing protein YaaA	RecName: Full=Probable ribosome maturation protein RlbA [Bacillus subtilis subsp. subtilis str. 168]	PF13275	S4_2	S4 domain	COG2501	Ribosome-associated protein YbcJ, S4-like RNA-binding protein	GO:0003723	RNA binding	K14761	ribosome-associated protein	-	-
gene0004	recF	MULTISPECIES: DNA replication/repair protein RecF	RP01	Chromosome	Chromosome	+	3054	4166	1113	MULTISPECIES: DNA replication/repair protein RecF	RecName: Full=DNA replication and repair protein RecF [Bacillus licheniformis DSM 13 = ATCC 14580]	PF02463;PF13175;PF13476;PF11398;PF13514	SMC_N;AAA_15;AAA_23;DUF2813;AAA_27	RecF/RecN/SMC N terminal domain;AAA ATPase domain;AAA domain;Protein of unknown function (DUF2813);AAA domain	COG1195	Recombinational DNA repair ATPase RecF	GO:0006281;GO:0006260;GO:0009432;GO:0005737;GO:0005524;GO:0003697	DNA repair;;DNA replication;;SOS response;;cytoplasm;;ATP binding;;single-stranded DNA binding	K03629	DNA replication and repair protein RecF	-	-
gene0005	gyrB	DNA gyrase subunit B	RP01	Chromosome	Chromosome	+	4481	6400	1920	DNA gyrase subunit B	RecName: Full=DNA gyrase subunit B [Bacillus subtilis subsp. subtilis str. 168]	PF00204;PF00986;PF02518;PF01751	DNA_gyraseB;DNA_gyraseB_C;HATPase_c;Toprim	DNA gyrase B;DNA gyrase B subunit, carboxyl terminus;Histidine kinase-, DNA gyrase B-, and HSP90-like ATPase;Toprim domain	COG0187	DNA gyrase/topoisomerase IV, subunit B	GO:0006265;GO:0006261;GO:0005737;GO:0005694;GO:0005524;GO:0003677;GO:0046872;GO:0003918	DNA topological change;;DNA-dependent DNA replication;;cytoplasm;;chromosome;;ATP binding;;DNA binding;;metal ion binding;;DNA topoisomerase type II (double strand cut, ATP-hydrolyzing) activity	K02470	DNA gyrase subunit B [EC:5.6.2.2]	5.6.2.2	Isomerases; Isomerases altering macromolecular conformation; Enzymes altering nucleic acid conformation; DNA topoisomerase (ATP-hydrolysing)
gene0006	gyrA	MULTISPECIES: DNA gyrase subunit A	RP01	Chromosome	Chromosome	+	6592	9060	2469	MULTISPECIES: DNA gyrase subunit A	RecName: Full=DNA gyrase subunit A [Bacillus subtilis subsp. subtilis str. 168]	PF00521;PF03989;PF03989;PF03989;PF03989;PF03989;PF03989	DNA_topoisoIV;DNA_gyraseA_C;DNA_gyraseA_C;DNA_gyraseA_C;DNA_gyraseA_C;DNA_gyraseA_C;DNA_gyraseA_C	DNA gyrase/topoisomerase IV, subunit A;DNA gyrase C-terminal domain, beta-propeller;DNA gyrase C-terminal domain, beta-propeller;DNA gyrase C-terminal domain, beta-propeller;DNA gyrase C-terminal domain, beta-propeller;DNA gyrase C-terminal domain, beta-propeller;DNA gyrase C-terminal domain, beta-propeller	COG0188	DNA gyrase/topoisomerase IV, subunit A	GO:0006265;GO:0006261;GO:0005737;GO:0005694;GO:0005524;GO:0003677;GO:0003918	DNA topological change;;DNA-dependent DNA replication;;cytoplasm;;chromosome;;ATP binding;;DNA binding;;DNA topoisomerase type II (double strand cut, ATP-hydrolyzing) activity	K02469	DNA gyrase subunit A [EC:5.6.2.2]	5.6.2.2	Isomerases; Isomerases altering macromolecular conformation; Enzymes altering nucleic acid conformation; DNA topoisomerase (ATP-hydrolysing)
gene0012	-	MULTISPECIES: YaaC family protein	RP01	Chromosome	Chromosome	-	15407	14430	978	MULTISPECIES: YaaC family protein	RecName: Full=Uncharacterized protein YaaC [Bacillus subtilis subsp. subtilis str. 168]	PF14175	YaaC	YaaC-like Protein	-	-	-	-	-	-	-	-
gene0013	guaB	MULTISPECIES: IMP dehydrogenase	RP01	Chromosome	Chromosome	+	15529	16995	1467	MULTISPECIES: IMP dehydrogenase	RecName: Full=Inosine-5'-monophosphate dehydrogenase; Short=IMP dehydrogenase; Short=IMPD; Short=IMPDH; AltName: Full=Superoxide-inducible protein 12; Short=SOI12 [Bacillus subtilis subsp. subtilis str. 168]	PF00478;PF00571;PF00571	IMPDH;CBS;CBS	IMP dehydrogenase / GMP reductase domain;CBS domain;CBS domain	COG0516	IMP dehydrogenase/GMP reductase	GO:0006177;GO:0046872;GO:0000166;GO:0003938	GMP biosynthetic process;;metal ion binding;;nucleotide binding;;IMP dehydrogenase activity	K00088	IMP dehydrogenase [EC:1.1.1.205]	1.1.1.205	Oxidoreductases; Acting on the CH-OH group of donors; With NAD+ or NADP+ as acceptor; IMP:NAD+ oxidoreductase
gene0014	dacC	MULTISPECIES: D-alanyl-D-alanine carboxypeptidase	RP01	Chromosome	Chromosome	+	17150	18475	1326	MULTISPECIES: D-alanyl-D-alanine carboxypeptidase	RecName: Full=D-alanyl-D-alanine carboxypeptidase DacA; Short=CPase; Short=DD-carboxypeptidase; Short=DD-peptidase; AltName: Full=Penicillin-binding protein 5; Short=PBP-5; Flags: Precursor [Bacillus subtilis subsp. subtilis str. 168]	PF00768;PF07943;PF13354	Peptidase_S11;PBP5_C;Beta-lactamase2	D-alanyl-D-alanine carboxypeptidase;Penicillin-binding protein 5, C-terminal domain;Beta-lactamase enzyme family	COG1686	D-alanyl-D-alanine carboxypeptidase	GO:0008360;GO:0071555;GO:0009252;GO:0009002	regulation of cell shape;;cell wall organization;;peptidoglycan biosynthetic process;;serine-type D-Ala-D-Ala carboxypeptidase activity	K07258	serine-type D-Ala-D-Ala carboxypeptidase (penicillin-binding protein 5/6) [EC:3.4.16.4]	3.4.16.4	Hydrolases; Acting on peptide bonds (peptidases); Serine-type carboxypeptidases; serine-type D-Ala-D-Ala carboxypeptidase
gene0015	pdxS	MULTISPECIES: pyridoxal 5'-phosphate synthase lyase subunit PdxS	RP01	Chromosome	Chromosome	+	18662	19546	885	MULTISPECIES: pyridoxal 5'-phosphate synthase lyase subunit PdxS	RecName: Full=Pyridoxal 5'-phosphate synthase subunit PdxS; Short=PLP synthase subunit PdxS; AltName: Full=Pdx1 [Bacillus licheniformis DSM 13 = ATCC 14580]	PF01680;PF05690	SOR_SNZ;ThiG	SOR/SNZ family;Thiazole biosynthesis protein ThiG	COG0214	Pyridoxal 5'-phosphate synthase subunit PdxS	GO:0042823;GO:0036381	pyridoxal phosphate biosynthetic process;;pyridoxal 5'-phosphate synthase (glutamine hydrolysing) activity	K06215	pyridoxal 5'-phosphate synthase pdxS subunit [EC:4.3.3.6]	4.3.3.6	Lyases; Carbon-nitrogen lyases; Amine-lyases; D-ribose 5-phosphate,D-glyceraldehyde 3-phosphate pyridoxal 5'-phosphate-lyase
gene0016	pdxT	MULTISPECIES: pyridoxal 5'-phosphate synthase glutaminase subunit PdxT	RP01	Chromosome	Chromosome	+	19568	20158	591	MULTISPECIES: pyridoxal 5'-phosphate synthase glutaminase subunit PdxT	RecName: Full=Pyridoxal 5'-phosphate synthase subunit PdxT; AltName: Full=Pdx2; AltName: Full=Pyridoxal 5'-phosphate synthase glutaminase subunit [Bacillus licheniformis DSM 13 = ATCC 14580]	PF01174;PF07685;PF00117;PF03575	SNO;GATase_3;GATase;Peptidase_S51	SNO glutamine amidotransferase family;CobB/CobQ-like glutamine amidotransferase domain;Glutamine amidotransferase class-I;Peptidase family S51	COG0311	Pyridoxal 5'-phosphate synthase subunit PdxT (glutamine amidotransferase)	GO:0042823;GO:0006543;GO:0016740;GO:0004359;GO:0036381	pyridoxal phosphate biosynthetic process;;glutamine catabolic process;;transferase activity;;glutaminase activity;;pyridoxal 5'-phosphate synthase (glutamine hydrolysing) activity	K08681	pyridoxal 5'-phosphate synthase pdxT subunit [EC:4.3.3.6]	4.3.3.6	Lyases; Carbon-nitrogen lyases; Amine-lyases; D-ribose 5-phosphate,D-glyceraldehyde 3-phosphate pyridoxal 5'-phosphate-lyase
gene0017	serS	MULTISPECIES: serine--tRNA ligase	RP01	Chromosome	Chromosome	+	20487	21764	1278	MULTISPECIES: serine--tRNA ligase	RecName: Full=Serine--tRNA ligase; AltName: Full=Seryl-tRNA synthetase; Short=SerRS; AltName: Full=Seryl-tRNA(Ser/Sec) synthetase [Bacillus licheniformis DSM 13 = ATCC 14580]	PF00587;PF02403	tRNA-synt_2b;Seryl_tRNA_N	tRNA synthetase class II core domain (G, H, P, S and T);Seryl-tRNA synthetase N-terminal domain	COG0172	Seryl-tRNA synthetase	GO:0016260;GO:0097056;GO:0006434;GO:0005737;GO:0005524;GO:0004828	selenocysteine biosynthetic process;;selenocysteinyl-tRNA(Sec) biosynthetic process;;seryl-tRNA aminoacylation;;cytoplasm;;ATP binding;;serine-tRNA ligase activity	K01875	seryl-tRNA synthetase [EC:6.1.1.11]	6.1.1.11	Ligases; Forming carbon-oxygen bonds; Ligases forming aminoacyl-tRNA and related compounds; L-serine:tRNASer ligase (AMP-forming)
gene0018	glxK	MULTISPECIES: glycerate kinase	RP01	Chromosome	Chromosome	-	22924	21794	1131	MULTISPECIES: glycerate kinase	RecName: Full=Glycerate kinase [Bacillus subtilis subsp. subtilis str. 168]	PF02595	Gly_kinase	Glycerate kinase family	COG1929	Glycerate kinase	-	-	K00865	glycerate 2-kinase [EC:2.7.1.165]	2.7.1.165	Transferases; Transferring phosphorus-containing groups; Phosphotransferases with an alcohol group as acceptor; ATP:D-glycerate 2-phosphotransferase
gene0019	-	MULTISPECIES: GntP family permease	RP01	Chromosome	Chromosome	-	24208	22940	1269	MULTISPECIES: GntP family permease	RecName: Full=Uncharacterized transporter HI_0092 [Haemophilus influenzae Rd KW20]	PF02447;PF13726	GntP_permease;Na_H_antiport_2	GntP family permease;Na+-H+ antiporter family	COG2610	H+/gluconate symporter GntT or related permease, GntP/DsdX family	-	-	K03299	gluconate:H+ symporter, GntP family	-	-
gene0020	cdaR	MULTISPECIES: helix-turn-helix domain-containing protein	RP01	Chromosome	Chromosome	-	25416	24298	1119	MULTISPECIES: helix-turn-helix domain-containing protein	RecName: Full=Carbohydrate diacid regulator; AltName: Full=Sugar diacid regulator [Escherichia coli K-12]	PF05651;PF13556;PF17853	Diacid_rec;HTH_30;GGDEF_2	Putative sugar diacid recognition;PucR C-terminal helix-turn-helix domain;GGDEF-like domain	COG3835	Sugar diacid utilization regulator CdaR	-	-	K02647	carbohydrate diacid regulator	-	-
gene0021	-	MULTISPECIES: SMI1/KNR4 family protein	RP01	Chromosome	Chromosome	-	25868	25446	423	MULTISPECIES: SMI1/KNR4 family protein	-	PF14568;PF09346	SUKH_6;SMI1_KNR4	SMI1-KNR4 cell-wall;SMI1 / KNR4 family (SUKH-1)	-	-	-	-	-	-	-	-
gene0023	dck	MULTISPECIES: deoxynucleoside kinase	RP01	Chromosome	Chromosome	-	26870	26229	642	MULTISPECIES: deoxynucleoside kinase	RecName: Full=Deoxyadenosine/deoxycytidine kinase; Short=dAK/dCK [Bacillus subtilis subsp. subtilis str. 168]	PF01712;PF13238	dNK;AAA_18	Deoxynucleoside kinase;AAA domain	COG1428	Deoxyadenosine/deoxycytidine kinase	GO:0005524;GO:0019136	ATP binding;;deoxynucleoside kinase activity	K15519	deoxyadenosine/deoxycytidine kinase [EC:2.7.1.76 2.7.1.74]	2.7.1.74;2.7.1.76	Transferases; Transferring phosphorus-containing groups; Phosphotransferases with an alcohol group as acceptor; NTP:deoxycytidine 5'-phosphotransferase|Transferases; Transferring phosphorus-containing groups; Phosphotransferases with an alcohol group as acceptor; ATP:2'-deoxyadenosine 5'-phosphotransferase
gene0024	dgk	MULTISPECIES: deoxynucleoside kinase	RP01	Chromosome	Chromosome	-	27490	26867	624	MULTISPECIES: deoxynucleoside kinase	RecName: Full=Deoxyguanosine kinase; Short=DGUO kinase; Short=dGK [Bacillus subtilis subsp. subtilis str. 168]	PF01712;PF13238;PF02223;PF13671	dNK;AAA_18;Thymidylate_kin;AAA_33	Deoxynucleoside kinase;AAA domain;Thymidylate kinase;AAA domain	COG1428	Deoxyadenosine/deoxycytidine kinase	GO:0005524;GO:0019136	ATP binding;;deoxynucleoside kinase activity	K15518	deoxyguanosine kinase [EC:2.7.1.113]	2.7.1.113	Transferases; Transferring phosphorus-containing groups; Phosphotransferases with an alcohol group as acceptor; ATP:deoxyguanosine 5'-phosphotransferase
gene0025	yaaH	glycoside hydrolase family 18 protein	RP01	Chromosome	Chromosome	-	28895	27576	1320	glycoside hydrolase family 18 protein	RecName: Full=Cortical fragment-lytic enzyme; Short=CFLE; AltName: Full=Spore germination protein; AltName: Full=Spore peptidoglycan N-acetylglucosaminidase [Bacillus subtilis subsp. subtilis str. 168]	PF00704;PF01476;PF01476	Glyco_hydro_18;LysM;LysM	Glycosyl hydrolases family 18;LysM domain;LysM domain	COG3858	Spore cortex hydrolase SleL/YaaH, N-acetylglucosaminidase of GH18 family	GO:0005975;GO:0008061	carbohydrate metabolic process;;chitin binding	K06306	spore germination protein	-	-
gene0026	-	MULTISPECIES: cysteine hydrolase	RP01	Chromosome	Chromosome	-	29474	28932	543	MULTISPECIES: cysteine hydrolase	RecName: Full=Uncharacterized isochorismatase family protein YaaI [Bacillus subtilis subsp. subtilis str. 168]	PF00857	Isochorismatase	Isochorismatase family	COG1335	Nicotinamidase-related amidase	GO:0016787	hydrolase activity	-	-	-	-
gene0027	tadA	MULTISPECIES: tRNA adenosine(34) deaminase TadA	RP01	Chromosome	Chromosome	+	29563	30045	483	MULTISPECIES: tRNA adenosine(34) deaminase TadA	RecName: Full=tRNA-specific adenosine deaminase [Bacillus subtilis subsp. subtilis str. 168]	PF14437;PF00383	MafB19-deam;dCMP_cyt_deam_1	MafB19-like deaminase;Cytidine and deoxycytidylate deaminase zinc-binding region	COG0590	tRNA(Arg) A34 adenosine deaminase TadA	GO:0002100;GO:0008270;GO:0052717	tRNA wobble adenosine to inosine editing;;zinc ion binding;;tRNA-specific adenosine-34 deaminase activity	K11991	tRNA(adenine34) deaminase [EC:3.5.4.33]	3.5.4.33	Hydrolases; Acting on carbon-nitrogen bonds, other than peptide bonds; In cyclic amidines; tRNA(adenine34) aminohydrolase
gene0028	dnaX	MULTISPECIES: DNA polymerase III subunit gamma/tau	RP01	Chromosome	Chromosome	+	30531	32231	1701	MULTISPECIES: DNA polymerase III subunit gamma/tau	RecName: Full=DNA polymerase III subunit gamma/tau [Bacillus subtilis subsp. subtilis str. 168]	PF13177;PF12169;PF00004;PF05496	DNA_pol3_delta2;DNA_pol3_gamma3;AAA;RuvB_N	DNA polymerase III, delta subunit;DNA polymerase III subunits gamma and tau domain III;ATPase family associated with various cellular activities (AAA);Holliday junction DNA helicase RuvB P-loop domain	COG2812	DNA polymerase III, gamma/tau subunits	GO:0006260;GO:0009360;GO:0005524;GO:0003677;GO:0003887	DNA replication;;DNA polymerase III complex;;ATP binding;;DNA binding;;DNA-directed DNA polymerase activity	K02343	DNA polymerase III subunit gamma/tau [EC:2.7.7.7]	2.7.7.7	Transferases; Transferring phosphorus-containing groups; Nucleotidyltransferases; 2'-deoxyribonucleoside-5'-triphosphate:DNA deoxynucleotidyltransferase (DNA-directed)
gene0029	ebfC	MULTISPECIES: YbaB/EbfC family nucleoid-associated protein	RP01	Chromosome	Chromosome	+	32258	32581	324	MULTISPECIES: YbaB/EbfC family nucleoid-associated protein	RecName: Full=Nucleoid-associated protein BLi00029/BL02358 [Bacillus licheniformis DSM 13 = ATCC 14580]	PF02575	YbaB_DNA_bd	YbaB/EbfC DNA-binding family	COG0718	DNA-binding nucleoid-associated protein YbaB/EfbC	GO:0005737;GO:0043590;GO:0003677	cytoplasm;;bacterial nucleoid;;DNA binding	K09747	nucleoid-associated protein EbfC	-	-
gene0030	recR	MULTISPECIES: recombination protein RecR	RP01	Chromosome	Chromosome	+	32595	33191	597	MULTISPECIES: recombination protein RecR	RecName: Full=Recombination protein RecR [Bacillus licheniformis DSM 13 = ATCC 14580]	PF13662;PF02132;PF01751	Toprim_4;RecR;Toprim	Toprim domain;RecR protein;Toprim domain	COG0353	Recombinational DNA repair protein RecR	GO:0006281;GO:0006310;GO:0003677;GO:0046872	DNA repair;;DNA recombination;;DNA binding;;metal ion binding	K06187	recombination protein RecR	-	-
gene0031	-	MULTISPECIES: YaaL family protein	RP01	Chromosome	Chromosome	+	33212	33436	225	MULTISPECIES: YaaL family protein	RecName: Full=Uncharacterized protein YaaL [Bacillus subtilis subsp. subtilis str. 168]	PF10704	DUF2508	Protein of unknown function (DUF2508)	-	-	-	-	-	-	-	-
gene0032	bofA	BofA	RP01	Chromosome	Chromosome	+	33450	33767	318	BofA	RecName: Full=Sigma-K factor-processing regulatory protein BofA; AltName: Full=Bypass-of-forespore protein A [Bacillus subtilis subsp. subtilis str. 168]	PF07441	BofA	SigmaK-factor processing regulatory protein BofA	COG5848	SigmaK-processing regulatory protein BofA (Bypass-of-forespore protein A)	GO:0016021	integral component of membrane	K06317	inhibitor of the pro-sigma K processing machinery	-	-
gene0038	-	MULTISPECIES: sigma factor G inhibitor Gin	RP01	Chromosome	Chromosome	+	39221	39412	192	MULTISPECIES: sigma factor G inhibitor Gin	RecName: Full=Anti-sigma-G factor Gin; AltName: Full=Protein CsfB [Bacillus subtilis subsp. subtilis str. 168]	PF10764	Gin	Inhibitor of sigma-G Gin	COG5865	Forespore-specific anti-sigma-G factor CsfB/Gin	-	-	-	-	-	-
gene0039	-	MULTISPECIES: 5-bromo-4-chloroindolyl phosphate hydrolysis family protein	RP01	Chromosome	Chromosome	+	39625	40242	618	MULTISPECIES: 5-bromo-4-chloroindolyl phosphate hydrolysis family protein	RecName: Full=Protein XpaC [Bacillus subtilis subsp. subtilis str. 168]	PF10112	Halogen_Hydrol	5-bromo-4-chloroindolyl phosphate hydrolysis protein	COG4915	5-bromo-4-chloroindolyl phosphatase XpaC	GO:0016021	integral component of membrane	-	-	-	-
gene0040	-	MULTISPECIES: toxic anion resistance protein	RP01	Chromosome	Chromosome	+	40259	41452	1194	MULTISPECIES: toxic anion resistance protein	RecName: Full=Uncharacterized protein YaaN [Bacillus subtilis subsp. subtilis str. 168]	PF05816	TelA	Toxic anion resistance protein (TelA)	COG3853	Uncharacterized conserved protein YaaN involved in tellurite resistance	-	-	-	-	-	-
gene0041	-	MULTISPECIES: aminotransferase class I/II-fold pyridoxal phosphate-dependent enzyme	RP01	Chromosome	Chromosome	+	41592	43034	1443	MULTISPECIES: aminotransferase class I/II-fold pyridoxal phosphate-dependent enzyme	RecName: Full=Uncharacterized protein YaaO [Bacillus subtilis subsp. subtilis str. 168]	PF01276;PF03711;PF01212;PF00155;PF01041;PF01053;PF00266;PF05889;PF02347	OKR_DC_1;OKR_DC_1_C;Beta_elim_lyase;Aminotran_1_2;DegT_DnrJ_EryC1;Cys_Met_Meta_PP;Aminotran_5;SepSecS;GDC-P	Orn/Lys/Arg decarboxylase, major domain;Orn/Lys/Arg decarboxylase, C-terminal domain;Beta-eliminating lyase;Aminotransferase class I and II;DegT/DnrJ/EryC1/StrS aminotransferase family;Cys/Met metabolism PLP-dependent enzyme;Aminotransferase class-V;O-phosphoseryl-tRNA(Sec) selenium transferase, SepSecS;Glycine cleavage system P-protein	COG1982	Arginine/lysine/ornithine decarboxylase	-	-	-	-	-	-
gene0042	tmk	MULTISPECIES: dTMP kinase	RP01	Chromosome	Chromosome	+	43031	43669	639	MULTISPECIES: dTMP kinase	RecName: Full=Thymidylate kinase; AltName: Full=dTMP kinase [Bacillus licheniformis DSM 13 = ATCC 14580]	PF02223;PF13521	Thymidylate_kin;AAA_28	Thymidylate kinase;AAA domain	COG0125	Thymidylate kinase	-	-	K00943	dTMP kinase [EC:2.7.4.9]	2.7.4.9	Transferases; Transferring phosphorus-containing groups; Phosphotransferases with a phosphate group as acceptor; ATP:dTMP phosphotransferase
gene0043	-	MULTISPECIES: cyclic-di-AMP receptor	RP01	Chromosome	Chromosome	+	43744	44073	330	MULTISPECIES: cyclic-di-AMP receptor	RecName: Full=Cyclic di-AMP receptor A; Short=c-di-AMP receptor A; AltName: Full=PII-like signal transduction protein DarA [Bacillus subtilis subsp. subtilis str. 168]	PF06153	CdAMP_rec	Cyclic-di-AMP receptor	COG3870	Cyclic di-AMP receptor DarA/PstA	-	-	-	-	-	-
gene0044	-	MULTISPECIES: YaaR family protein	RP01	Chromosome	Chromosome	+	44085	44525	441	MULTISPECIES: YaaR family protein	RecName: Full=Uncharacterized protein YaaR [Bacillus subtilis subsp. subtilis str. 168]	PF03885	DUF327	Protein of unknown function (DUF327)	COG1728	Uncharacterized conserved protein YaaR, TM1646/DUF327 family	-	-	K09770	uncharacterized protein	-	-
gene0045	holB	MULTISPECIES: DNA polymerase III subunit delta'	RP01	Chromosome	Chromosome	+	44537	45526	990	MULTISPECIES: DNA polymerase III subunit delta'	RecName: Full=DNA polymerase III subunit delta' [Bacillus subtilis subsp. subtilis str. 168]	PF13177;PF09115	DNA_pol3_delta2;DNApol3-delta_C	DNA polymerase III, delta subunit;DNA polymerase III, delta subunit, C terminal	COG0470	DNA polymerase III, delta prime subunit	GO:0006260;GO:0009360;GO:0003677;GO:0003887;GO:0008408	DNA replication;;DNA polymerase III complex;;DNA binding;;DNA-directed DNA polymerase activity;;3'-5' exonuclease activity	K02341	DNA polymerase III subunit delta' [EC:2.7.7.7]	2.7.7.7	Transferases; Transferring phosphorus-containing groups; Nucleotidyltransferases; 2'-deoxyribonucleoside-5'-triphosphate:DNA deoxynucleotidyltransferase (DNA-directed)
gene0046	-	MULTISPECIES: stage 0 sporulation family protein	RP01	Chromosome	Chromosome	+	45529	46356	828	MULTISPECIES: stage 0 sporulation family protein	RecName: Full=Stage 0 sporulation protein YaaT [Bacillus subtilis subsp. subtilis str. 168]	PF04468	PSP1	PSP1 C-terminal conserved region	COG1774	Cell fate regulator YaaT, PSP1 superfamily (controls sporulation, competence, biofilm development)	-	-	-	-	-	-
gene0047	-	MULTISPECIES: DNA replication initiation control protein YabA	RP01	Chromosome	Chromosome	+	46371	46733	363	MULTISPECIES: DNA replication initiation control protein YabA	RecName: Full=Initiation-control protein YabA [Bacillus licheniformis DSM 13 = ATCC 14580]	PF06156	YabA	Initiation control protein YabA	COG4467	Regulator of replication initiation timing YabA	GO:0006260	DNA replication	-	-	-	-
gene0048	-	MULTISPECIES: tRNA1(Val) (adenine(37)-N6)-methyltransferase	RP01	Chromosome	Chromosome	+	46798	47541	744	MULTISPECIES: tRNA1(Val) (adenine(37)-N6)-methyltransferase	RecName: Full=Uncharacterized protein YabB [Bacillus subtilis subsp. subtilis str. 168]	PF05175;PF13649;PF03602;PF05971	MTS;Methyltransf_25;Cons_hypoth95;Methyltransf_10	Methyltransferase small domain;Methyltransferase domain;Conserved hypothetical protein 95;RNA methyltransferase	COG4123	tRNA1(Val) A37 N6-methylase TrmN6	GO:0032259;GO:0008168	methylation;;methyltransferase activity	-	-	-	-
gene0049	-	MULTISPECIES: GIY-YIG nuclease family protein	RP01	Chromosome	Chromosome	+	47528	47821	294	MULTISPECIES: GIY-YIG nuclease family protein	RecName: Full=UPF0213 protein BLi00048/BL00536 [Bacillus licheniformis DSM 13 = ATCC 14580]	PF01541	GIY-YIG	GIY-YIG catalytic domain	COG2827	Predicted endonuclease, GIY-YIG superfamily	-	-	K07461	putative endonuclease	-	-
gene0050	rsmI	methyltransferase	RP01	Chromosome	Chromosome	+	47793	48671	879	methyltransferase	RecName: Full=Ribosomal RNA small subunit methyltransferase I; AltName: Full=16S rRNA 2'-O-ribose C1402 methyltransferase; AltName: Full=rRNA (cytidine-2'-O-)-methyltransferase RsmI [Bacillus subtilis subsp. subtilis str. 168]	PF00590	TP_methylase	Tetrapyrrole (Corrin/Porphyrin) Methylases	COG0313	16S rRNA C1402 (ribose-2'-O) methylase RsmI	-	-	K07056	16S rRNA (cytidine1402-2'-O)-methyltransferase [EC:2.1.1.198]	2.1.1.198	Transferases; Transferring one-carbon groups; Methyltransferases; S-adenosyl-L-methionine:16S rRNA (cytidine1402-2'-O)-methyltransferase
gene0051	abrB	transcriptional regulator AbrB	RP01	Chromosome	Chromosome	-	49005	48721	285	transcriptional regulator AbrB	RecName: Full=Transition state regulatory protein AbrB [Bacillus subtilis subsp. subtilis str. 168]	PF18277;PF04014	AbrB_C;MazE_antitoxin	AbrB C-terminal domain;Antidote-toxin recognition MazE, bacterial antitoxin	COG2002	Bifunctional DNA-binding transcriptional regulator of stationary/sporulation/toxin gene expression and antitoxin component of the YhaV-PrlF toxin-antitoxin module	GO:0003677	DNA binding	K06284	AbrB family transcriptional regulator, transcriptional pleiotropic regulator of transition state genes	-	-
gene0052	metG	MULTISPECIES: methionine--tRNA ligase	RP01	Chromosome	Chromosome	+	49519	51507	1989	MULTISPECIES: methionine--tRNA ligase	RecName: Full=Methionine--tRNA ligase; AltName: Full=Methionyl-tRNA synthetase; Short=MetRS [Bacillus subtilis subsp. subtilis str. 168]	PF09334;PF00133;PF00133;PF01588;PF01406;PF19303;PF08264	tRNA-synt_1g;tRNA-synt_1;tRNA-synt_1;tRNA_bind;tRNA-synt_1e;Anticodon_3;Anticodon_1	tRNA synthetases class I (M);tRNA synthetases class I (I, L, M and V);tRNA synthetases class I (I, L, M and V);Putative tRNA binding domain;tRNA synthetases class I (C) catalytic domain;Anticodon binding domain of methionyl tRNA ligase;Anticodon-binding domain of tRNA ligase	COG0073	tRNA-binding EMAP/Myf domain	GO:0006431;GO:0005737;GO:0005524;GO:0000049;GO:0004825	methionyl-tRNA aminoacylation;;cytoplasm;;ATP binding;;tRNA binding;;methionine-tRNA ligase activity	K01874	methionyl-tRNA synthetase [EC:6.1.1.10]	6.1.1.10	Ligases; Forming carbon-oxygen bonds; Ligases forming aminoacyl-tRNA and related compounds; L-methionine:tRNAMet ligase (AMP-forming)
gene0053	tatD	MULTISPECIES: TatD family hydrolase	RP01	Chromosome	Chromosome	+	51591	52358	768	MULTISPECIES: TatD family hydrolase	RecName: Full=Uncharacterized metal-dependent hydrolase YabD [Bacillus subtilis subsp. subtilis str. 168]	PF01026	TatD_DNase	TatD related DNase	COG0084	3'->5' ssDNA/RNA exonuclease TatD	GO:0016888	endodeoxyribonuclease activity, producing 5'-phosphomonoesters	K03424	TatD DNase family protein [EC:3.1.21.-]	-	-
gene0054	-	MULTISPECIES: G5 and 3D domain-containing protein	RP01	Chromosome	Chromosome	+	52603	53799	1197	MULTISPECIES: G5 and 3D domain-containing protein	RecName: Full=Putative cell wall shaping protein YabE; Flags: Precursor [Bacillus subtilis subsp. subtilis str. 168]	PF03990;PF03990;PF03990;PF06725;PF07501	DUF348;DUF348;DUF348;3D;G5	G5-linked-Ubiquitin-like domain;G5-linked-Ubiquitin-like domain;G5-linked-Ubiquitin-like domain;3D domain;G5 domain	COG3583	Uncharacterized conserved protein YabE, contains G5 and tandem DUF348 domains	GO:0009254;GO:0019867;GO:0004553	peptidoglycan turnover;;outer membrane;;hydrolase activity, hydrolyzing O-glycosyl compounds	-	-	-	-
gene0055	rnmV	MULTISPECIES: ribonuclease M5	RP01	Chromosome	Chromosome	+	53967	54527	561	MULTISPECIES: ribonuclease M5	RecName: Full=Ribonuclease M5; AltName: Full=RNase M5; AltName: Full=Ribosomal RNA terminal maturase M5 [Bacillus subtilis subsp. subtilis str. 168]	PF13331;PF13662;PF01751	DUF4093;Toprim_4;Toprim	Domain of unknown function (DUF4093);Toprim domain;Toprim domain	COG1658	5S rRNA maturation ribonuclease M5, contains TOPRIM domain	GO:0006364;GO:0005737;GO:0019843;GO:0043822	rRNA processing;;cytoplasm;;rRNA binding;;ribonuclease M5 activity	K05985	ribonuclease M5 [EC:3.1.26.8]	3.1.26.8	Hydrolases; Acting on ester bonds; Endoribonucleases producing 5'-phosphomonoesters; ribonuclease M5
gene0056	ksgA	MULTISPECIES: 16S rRNA (adenine(1518)-N(6)/adenine(1519)-N(6))-dimethyltransferase RsmA	RP01	Chromosome	Chromosome	+	54520	55398	879	MULTISPECIES: 16S rRNA (adenine(1518)-N(6)/adenine(1519)-N(6))-dimethyltransferase RsmA	RecName: Full=Ribosomal RNA small subunit methyltransferase A; AltName: Full=16S rRNA (adenine(1518)-N(6)/adenine(1519)-N(6))-dimethyltransferase; AltName: Full=16S rRNA dimethyladenosine transferase; AltName: Full=16S rRNA dimethylase; AltName: Full=S-adenosylmethionine-6-N', N'-adenosyl(rRNA) dimethyltransferase [Bacillus licheniformis DSM 13 = ATCC 14580]	PF00398	RrnaAD	Ribosomal RNA adenine dimethylase	COG0030	16S rRNA A1518 and A1519 N6-dimethyltransferase RsmA/KsgA/DIM1 (may also have DNA glycosylase/AP lyase activity)	GO:0005737;GO:0003723;GO:0052908	cytoplasm;;RNA binding;;16S rRNA (adenine(1518)-N(6)/adenine(1519)-N(6))-dimethyltransferase activity	K02528	16S rRNA (adenine1518-N6/adenine1519-N6)-dimethyltransferase [EC:2.1.1.182]	2.1.1.182	Transferases; Transferring one-carbon groups; Methyltransferases; S-adenosyl-L-methionine:16S rRNA (adenine1518-N6/adenine1519-N6)-dimethyltransferase
gene0057	yabG	MULTISPECIES: sporulation peptidase YabG	RP01	Chromosome	Chromosome	+	55558	56439	882	MULTISPECIES: sporulation peptidase YabG	RecName: Full=Sporulation-specific protease YabG [Bacillus subtilis subsp. subtilis str. 168]	PF05582	Peptidase_U57	YabG peptidase U57	COG5866	Sporulation-specific protease YabG	-	-	K06436	spore coat assemly protein	-	-
gene0058	-	MULTISPECIES: Veg family protein	RP01	Chromosome	Chromosome	+	56664	56924	261	MULTISPECIES: Veg family protein	RecName: Full=Protein Veg [Bacillus subtilis subsp. subtilis str. 168]	PF06257	VEG	Biofilm formation stimulator VEG	COG4466	Uncharacterized conserved protein Veg, DUF1021 family	GO:0006355	regulation of transcription, DNA-templated	-	-	-	-
gene0059	sspF	MULTISPECIES: small, acid-soluble spore protein, alpha/beta type	RP01	Chromosome	Chromosome	+	57081	57266	186	MULTISPECIES: small, acid-soluble spore protein, alpha/beta type	RecName: Full=Protein SspF [Bacillus subtilis subsp. subtilis str. 168]	PF00269	SASP	Small, acid-soluble spore proteins, alpha/beta type	COG5854	Small acid-soluble spore protein SspF (alpha/beta-type)	GO:0030435;GO:0006265;GO:0003690	sporulation resulting in formation of a cellular spore;;DNA topological change;;double-stranded DNA binding	K06423	small acid-soluble spore protein F (minor alpha/beta-type SASP)	-	-
gene0060	ispE	MULTISPECIES: 4-(cytidine 5'-diphospho)-2-C-methyl-D-erythritol kinase	RP01	Chromosome	Chromosome	+	57621	58490	870	MULTISPECIES: 4-(cytidine 5'-diphospho)-2-C-methyl-D-erythritol kinase	RecName: Full=4-diphosphocytidyl-2-C-methyl-D-erythritol kinase; Short=CMK; AltName: Full=4-(cytidine-5'-diphospho)-2-C-methyl-D-erythritol kinase [Bacillus licheniformis DSM 13 = ATCC 14580]	PF00288;PF08544	GHMP_kinases_N;GHMP_kinases_C	GHMP kinases N terminal domain;GHMP kinases C terminal	COG1947	4-diphosphocytidyl-2C-methyl-D-erythritol kinase	GO:0016114;GO:0019288;GO:0005524;GO:0050515	terpenoid biosynthetic process;;isopentenyl diphosphate biosynthetic process, methylerythritol 4-phosphate pathway;;ATP binding;;4-(cytidine 5'-diphospho)-2-C-methyl-D-erythritol kinase activity	K00919	4-diphosphocytidyl-2-C-methyl-D-erythritol kinase [EC:2.7.1.148]	2.7.1.148	Transferases; Transferring phosphorus-containing groups; Phosphotransferases with an alcohol group as acceptor; ATP:4-(cytidine 5'-diphospho)-2-C-methyl-D-erythritol 2-phosphotransferase
gene0061	purR	MULTISPECIES: pur operon repressor	RP01	Chromosome	Chromosome	+	58547	59380	834	MULTISPECIES: pur operon repressor	RecName: Full=Pur operon repressor [Bacillus subtilis subsp. subtilis str. 168]	PF09182;PF00156	PuR_N;Pribosyltran	Bacterial purine repressor, N-terminal;Phosphoribosyl transferase domain	COG0503	Adenine/guanine phosphoribosyltransferase or related PRPP-binding protein	GO:0045892;GO:0009116;GO:0045982;GO:0003677	negative regulation of transcription, DNA-templated;;nucleoside metabolic process;;negative regulation of purine nucleobase metabolic process;;DNA binding	K09685	purine operon repressor	-	-
gene0062	ridA	MULTISPECIES: RidA family protein	RP01	Chromosome	Chromosome	+	59398	59775	378	MULTISPECIES: RidA family protein	RecName: Full=2-iminobutanoate/2-iminopropanoate deaminase; AltName: Full=Enamine/imine deaminase [Bacillus subtilis subsp. subtilis str. 168]	PF01042	Ribonuc_L-PSP	Endoribonuclease L-PSP	COG0251	Enamine deaminase RidA, house cleaning of reactive enamine intermediates, YjgF/YER057c/UK114 family	-	-	K09022	2-iminobutanoate/2-iminopropanoate deaminase [EC:3.5.99.10]	3.5.99.10	Hydrolases; Acting on carbon-nitrogen bonds, other than peptide bonds; In other compounds; 2-iminobutanoate aminohydrolase
gene0063	spoVG	MULTISPECIES: septation regulator SpoVG	RP01	Chromosome	Chromosome	+	59956	60249	294	MULTISPECIES: septation regulator SpoVG	RecName: Full=Putative septation protein SpoVG; AltName: Full=Stage V sporulation protein G [Bacillus licheniformis DSM 13 = ATCC 14580]	PF04026	SpoVG	SpoVG	COG2088	DNA-binding protein SpoVG, cell septation regulator	GO:0030435;GO:0000917;GO:0030436	sporulation resulting in formation of a cellular spore;;division septum assembly;;asexual sporulation	K06412	stage V sporulation protein G	-	-
gene0064	glmU	MULTISPECIES: bifunctional UDP-N-acetylglucosamine diphosphorylase/glucosamine-1-phosphate N-acetyltransferase GlmU	RP01	Chromosome	Chromosome	+	60551	61921	1371	MULTISPECIES: bifunctional UDP-N-acetylglucosamine diphosphorylase/glucosamine-1-phosphate N-acetyltransferase GlmU	RecName: Full=Bifunctional protein GlmU; Includes: RecName: Full=UDP-N-acetylglucosamine pyrophosphorylase; AltName: Full=N-acetylglucosamine-1-phosphate uridyltransferase; Includes: RecName: Full=Glucosamine-1-phosphate N-acetyltransferase [Bacillus licheniformis DSM 13 = ATCC 14580]	PF00132;PF00132;PF00132;PF00132;PF00132;PF00132;PF00483;PF12804;PF01128;PF14602;PF02348	Hexapep;Hexapep;Hexapep;Hexapep;Hexapep;Hexapep;NTP_transferase;NTP_transf_3;IspD;Hexapep_2;CTP_transf_3	Bacterial transferase hexapeptide (six repeats);Bacterial transferase hexapeptide (six repeats);Bacterial transferase hexapeptide (six repeats);Bacterial transferase hexapeptide (six repeats);Bacterial transferase hexapeptide (six repeats);Bacterial transferase hexapeptide (six repeats);Nucleotidyl transferase;MobA-like NTP transferase domain;2-C-methyl-D-erythritol 4-phosphate cytidylyltransfera…	COG1207	Bifunctional protein GlmU, N-acetylglucosamine-1-phosphate-uridyltransferase/glucosamine-1-phosphate-acetyltransferase	-	-	K04042	bifunctional UDP-N-acetylglucosamine pyrophosphorylase / glucosamine-1-phosphate N-acetyltransferase [EC:2.7.7.23 2.3.1.157]	2.7.7.23;2.3.1.157	Transferases; Transferring phosphorus-containing groups; Nucleotidyltransferases; UTP:N-acetyl-alpha-D-glucosamine-1-phosphate uridylyltransferase|Transferases; Acyltransferases; Transferring groups other than aminoacyl groups; acetyl-CoA:alpha-D-glucosamine-1-phosphate N-acetyltransferase
gene0065	prsA	MULTISPECIES: ribose-phosphate diphosphokinase	RP01	Chromosome	Chromosome	+	61942	62892	951	MULTISPECIES: ribose-phosphate diphosphokinase	RecName: Full=Ribose-phosphate pyrophosphokinase; Short=RPPK; AltName: Full=5-phospho-D-ribosyl alpha-1-diphosphate; AltName: Full=Phosphoribosyl diphosphate synthase; AltName: Full=Phosphoribosyl pyrophosphate synthase; Short=P-Rib-PP synthase; Short=PPRibP synthase; Short=PRPP synthase; Short=PRPPase [Bacillus subtilis subsp. subtilis str. 168]	PF13793;PF14572;PF00156	Pribosyltran_N;Pribosyl_synth;Pribosyltran	N-terminal domain of ribose phosphate pyrophosphokinase;Phosphoribosyl synthetase-associated domain;Phosphoribosyl transferase domain	COG0462	Phosphoribosylpyrophosphate synthetase	GO:0009116;GO:0006015;GO:0009165;GO:0009156;GO:0005737;GO:0005524;GO:0000287;GO:0016301;GO:0004749	nucleoside metabolic process;;5-phosphoribose 1-diphosphate biosynthetic process;;nucleotide biosynthetic process;;ribonucleoside monophosphate biosynthetic process;;cytoplasm;;ATP binding;;magnesium ion binding;;kinase activity;;ribose phosphate diphosphokinase activity	K00948	ribose-phosphate pyrophosphokinase [EC:2.7.6.1]	2.7.6.1	Transferases; Transferring phosphorus-containing groups; Diphosphotransferases; ATP:D-ribose-5-phosphate diphosphotransferase
gene0066	rplY	MULTISPECIES: 50S ribosomal protein L25/general stress protein Ctc	RP01	Chromosome	Chromosome	+	62973	63599	627	MULTISPECIES: 50S ribosomal protein L25/general stress protein Ctc	RecName: Full=50S ribosomal protein L25; AltName: Full=General stress protein CTC [Bacillus licheniformis DSM 13 = ATCC 14580]	PF14693;PF01386	Ribosomal_TL5_C;Ribosomal_L25p	Ribosomal protein TL5, C-terminal domain;Ribosomal L25p family	COG1825	Ribosomal protein L25 (general stress protein Ctc)	GO:0006412;GO:0005840;GO:0003735;GO:0008097	translation;;ribosome;;structural constituent of ribosome;;5S rRNA binding	K02897	large subunit ribosomal protein L25	-	-
gene0067	pth	MULTISPECIES: aminoacyl-tRNA hydrolase	RP01	Chromosome	Chromosome	+	63716	64282	567	MULTISPECIES: aminoacyl-tRNA hydrolase	RecName: Full=Peptidyl-tRNA hydrolase; Short=PTH [Bacillus licheniformis DSM 13 = ATCC 14580]	PF01195	Pept_tRNA_hydro	Peptidyl-tRNA hydrolase	COG0193	Peptidyl-tRNA hydrolase	GO:0006412;GO:0005737;GO:0004045	translation;;cytoplasm;;aminoacyl-tRNA hydrolase activity	K01056	peptidyl-tRNA hydrolase, PTH1 family [EC:3.1.1.29]	3.1.1.29	Hydrolases; Acting on ester bonds; Carboxylic-ester hydrolases; aminoacyl-tRNA aminoacylhydrolase
gene0068	-	MULTISPECIES: anti-sigma-F factor Fin family protein	RP01	Chromosome	Chromosome	+	64339	64569	231	MULTISPECIES: anti-sigma-F factor Fin family protein	RecName: Full=Anti-sigma-F factor Fin; AltName: Full=Suppressor of recU and recB SubA [Bacillus subtilis subsp. subtilis str. 168]	PF10955	DUF2757	Protein of unknown function (DUF2757)	COG5867	Anti-sigma-F factor Fin	GO:0010468	regulation of gene expression	-	-	-	-
gene0069	mfd	MULTISPECIES: transcription-repair coupling factor	RP01	Chromosome	Chromosome	+	64634	68167	3534	MULTISPECIES: transcription-repair coupling factor	RecName: Full=Transcription-repair-coupling factor; Short=TRCF [Bacillus subtilis subsp. subtilis str. 168]	PF02559;PF17757;PF03461;PF00271;PF00270;PF04851	CarD_CdnL_TRCF;UvrB_inter;TRCF;Helicase_C;DEAD;ResIII	CarD-like/TRCF domain;UvrB interaction domain;TRCF domain;Helicase conserved C-terminal domain;DEAD/DEAH box helicase;Type III restriction enzyme, res subunit	COG1197	Transcription-repair coupling factor (superfamily II helicase)	GO:0006355;GO:0000716;GO:0005737;GO:0005524;GO:0016787;GO:0003684	regulation of transcription, DNA-templated;;transcription-coupled nucleotide-excision repair, DNA damage recognition;;cytoplasm;;ATP binding;;hydrolase activity;;damaged DNA binding	K03723	transcription-repair coupling factor (superfamily II helicase) [EC:3.6.4.-]	-	-
gene0070	spoVT	MULTISPECIES: stage V sporulation protein T	RP01	Chromosome	Chromosome	+	68305	68841	537	MULTISPECIES: stage V sporulation protein T	RecName: Full=Stage V sporulation protein T [Bacillus subtilis subsp. subtilis str. 168]	PF15714;PF04014	SpoVT_C;MazE_antitoxin	Stage V sporulation protein T C-terminal, transcription factor;Antidote-toxin recognition MazE, bacterial antitoxin	COG5845	Stage V sporulation protein SpoVT, regulator of stationary/sporulation gene expression	GO:0003677	DNA binding	K04769	AbrB family transcriptional regulator, stage V sporulation protein T	-	-
gene0071	-	MULTISPECIES: polysaccharide biosynthesis protein	RP01	Chromosome	Chromosome	+	69066	70658	1593	MULTISPECIES: polysaccharide biosynthesis protein	RecName: Full=Uncharacterized membrane protein YabM [Bacillus subtilis subsp. subtilis str. 168]	PF01943;PF14667;PF03023	Polysacc_synt;Polysacc_synt_C;MurJ	Polysaccharide biosynthesis protein;Polysaccharide biosynthesis C-terminal domain;Lipid II flippase MurJ	COG5841	Stage V sporulation protein SpoVB/SpoIIIF, required for spore cortex synthesis	-	-	K03328	polysaccharide transporter, PST family	-	-
gene0072	yabN	MULTISPECIES: nucleoside triphosphate pyrophosphohydrolase	RP01	Chromosome	Chromosome	+	70648	72117	1470	MULTISPECIES: nucleoside triphosphate pyrophosphohydrolase	RecName: Full=Uncharacterized protein YabN [Bacillus subtilis subsp. subtilis str. 168]	PF03819;PF03819;PF00590	MazG;MazG;TP_methylase	MazG nucleotide pyrophosphohydrolase domain;MazG nucleotide pyrophosphohydrolase domain;Tetrapyrrole (Corrin/Porphyrin) Methylases	COG3956	Uncharacterized conserved protein YabN, contains tetrapyrrole methylase and MazG-like pyrophosphatase domain	-	-	K02499	tetrapyrrole methylase family protein / MazG family protein	-	-
gene0073	-	MULTISPECIES: RNA-binding S4 domain-containing protein	RP01	Chromosome	Chromosome	+	72124	72387	264	MULTISPECIES: RNA-binding S4 domain-containing protein	RecName: Full=Uncharacterized protein YabO [Bacillus subtilis subsp. subtilis str. 168]	PF01479	S4	S4 domain	COG1188	Ribosomal 50S subunit-recycling heat shock protein, contains S4 domain	GO:0003723	RNA binding	-	-	-	-
gene0074	-	MULTISPECIES: sporulation protein YabP	RP01	Chromosome	Chromosome	+	72464	72772	309	MULTISPECIES: sporulation protein YabP	RecName: Full=Spore protein YabP [Bacillus subtilis subsp. subtilis str. 168]	PF07873	YabP	YabP family	COG5868	Sporulation protein YabP	-	-	-	-	-	-
gene0075	-	MULTISPECIES: spore cortex biosynthesis protein YabQ	RP01	Chromosome	Chromosome	+	72769	73395	627	MULTISPECIES: spore cortex biosynthesis protein YabQ	RecName: Full=Spore protein YabQ [Bacillus subtilis subsp. subtilis str. 168]	PF09578	Spore_YabQ	Spore cortex protein YabQ (Spore_YabQ)	COG5869	Spore cortex formation membrane protein YabQ	GO:0016021	integral component of membrane	-	-	-	-
gene0076	divA	MULTISPECIES: septum formation initiator family protein	RP01	Chromosome	Chromosome	+	73412	73789	378	MULTISPECIES: septum formation initiator family protein	RecName: Full=Cell division protein DivIC [Bacillus subtilis subsp. subtilis str. 168]	PF04977	DivIC	Septum formation initiator	COG2919	Cell division protein FtsB	GO:0051301;GO:0016021	cell division;;integral component of membrane	K13052	cell division protein DivIC	-	-
gene0077	-	MULTISPECIES: RNA-binding protein S1	RP01	Chromosome	Chromosome	+	73869	74267	399	MULTISPECIES: RNA-binding protein S1	RecName: Full=Uncharacterized protein YabR [Bacillus subtilis subsp. subtilis str. 168]	PF00575	S1	S1 RNA binding domain	COG1098	Predicted RNA-binding protein, contains ribosomal protein S1 (RPS1) domain	GO:0003676	nucleic acid binding	K07571	S1 RNA binding domain protein	-	-
gene0080	spoIIE	MULTISPECIES: stage II sporulation protein E	RP01	Chromosome	Chromosome	+	74784	77273	2490	MULTISPECIES: stage II sporulation protein E	RecName: Full=Stage II sporulation protein E; AltName: Full=Stage II sporulation protein H [Bacillus subtilis subsp. subtilis str. 168]	PF19732;PF07228	SpoIIE_N;SpoIIE	Stage II sporulation protein E N-terminal;Stage II sporulation protein E (SpoIIE)	COG5817	Stage II sporulation protein SpoIIE/SpoIIH (serine phosphatase - sigma-F activation)	GO:0016021;GO:0016791	integral component of membrane;;phosphatase activity	K06382	stage II sporulation protein E [EC:3.1.3.16]	3.1.3.16	Hydrolases; Acting on ester bonds; Phosphoric-monoester hydrolases; protein-serine/threonine-phosphate phosphohydrolase
gene0081	yfbK	MULTISPECIES: VWA domain-containing protein	RP01	Chromosome	Chromosome	+	77350	78087	738	MULTISPECIES: VWA domain-containing protein	RecName: Full=Uncharacterized protein YabS [Bacillus subtilis subsp. subtilis str. 168]	PF00092	VWA	von Willebrand factor type A domain	COG1240	vWFA (von Willebrand factor type A) domain of Mg and Co chelatases	-	-	K07114	Ca-activated chloride channel homolog	-	-
gene0082	-	MULTISPECIES: serine/threonine-protein kinase	RP01	Chromosome	Chromosome	+	78056	79090	1035	MULTISPECIES: serine/threonine-protein kinase	RecName: Full=Probable serine/threonine-protein kinase YabT [Bacillus subtilis subsp. subtilis str. 168]	PF00069	Pkinase	Protein kinase domain	COG0515	Serine/threonine protein kinase	GO:0016021;GO:0005524;GO:0004674	integral component of membrane;;ATP binding;;protein serine/threonine kinase activity	K08884	serine/threonine protein kinase, bacterial [EC:2.7.11.1]	2.7.11.1	Transferases; Transferring phosphorus-containing groups; Protein-serine/threonine kinases; ATP:protein phosphotransferase (non-specific)
gene0083	tilS	MULTISPECIES: tRNA lysidine(34) synthetase TilS	RP01	Chromosome	Chromosome	+	79193	80623	1431	MULTISPECIES: tRNA lysidine(34) synthetase TilS	RecName: Full=tRNA(Ile)-lysidine synthase; AltName: Full=tRNA(Ile)-2-lysyl-cytidine synthase; AltName: Full=tRNA(Ile)-lysidine synthetase [Bacillus licheniformis DSM 13 = ATCC 14580]	PF01171;PF11734;PF09179	ATP_bind_3;TilS_C;TilS	PP-loop family;TilS substrate C-terminal domain;TilS substrate binding domain	COG0037	tRNA(Ile)-lysidine synthase TilS/MesJ	-	-	K04075	tRNA(Ile)-lysidine synthase [EC:6.3.4.19]	6.3.4.19	Ligases; Forming carbon-nitrogen bonds; Other carbon-nitrogen ligases; L-lysine:[tRNAIle2]-cytidine34 ligase (AMP-forming)
gene0084	hprT	MULTISPECIES: hypoxanthine phosphoribosyltransferase	RP01	Chromosome	Chromosome	+	80607	81146	540	MULTISPECIES: hypoxanthine phosphoribosyltransferase	RecName: Full=Hypoxanthine-guanine phosphoribosyltransferase; Short=HGPRT; Short=HGPRTase [Bacillus subtilis subsp. subtilis str. 168]	PF00156	Pribosyltran	Phosphoribosyl transferase domain	COG0634	Hypoxanthine-guanine phosphoribosyltransferase	GO:0006166;GO:0032264;GO:0005737;GO:0046872;GO:0000166;GO:0052657;GO:0004422	purine ribonucleoside salvage;;IMP salvage;;cytoplasm;;metal ion binding;;nucleotide binding;;guanine phosphoribosyltransferase activity;;hypoxanthine phosphoribosyltransferase activity	K00760	hypoxanthine phosphoribosyltransferase [EC:2.4.2.8]	2.4.2.8	Transferases; Glycosyltransferases; Pentosyltransferases; IMP:diphosphate phospho-D-ribosyltransferase
gene0085	ftsH	MULTISPECIES: ATP-dependent zinc metalloprotease FtsH	RP01	Chromosome	Chromosome	+	81243	83162	1920	MULTISPECIES: ATP-dependent zinc metalloprotease FtsH	RecName: Full=ATP-dependent zinc metalloprotease FtsH; AltName: Full=Cell division protease FtsH [Bacillus subtilis subsp. subtilis str. 168]	PF01434;PF00004;PF17862;PF06480	Peptidase_M41;AAA;AAA_lid_3;FtsH_ext	Peptidase family M41;ATPase family associated with various cellular activities (AAA);AAA+ lid domain;FtsH Extracellular	COG0465	ATP-dependent Zn proteases	GO:0051301;GO:0030163;GO:0016021;GO:0005886;GO:0005524;GO:0008270;GO:0004222;GO:0004176	cell division;;protein catabolic process;;integral component of membrane;;plasma membrane;;ATP binding;;zinc ion binding;;metalloendopeptidase activity;;ATP-dependent peptidase activity	K03798	cell division protease FtsH [EC:3.4.24.-]	-	-
gene0086	coaX	MULTISPECIES: type III pantothenate kinase	RP01	Chromosome	Chromosome	+	83363	84139	777	MULTISPECIES: type III pantothenate kinase	RecName: Full=Type III pantothenate kinase; AltName: Full=PanK-III; AltName: Full=Pantothenic acid kinase [Bacillus licheniformis DSM 13 = ATCC 14580]	PF03309	Pan_kinase	Type III pantothenate kinase	COG1521	Pantothenate kinase type III	GO:0015937;GO:0005737;GO:0005524;GO:0046872;GO:0004594	coenzyme A biosynthetic process;;cytoplasm;;ATP binding;;metal ion binding;;pantothenate kinase activity	K03525	type III pantothenate kinase [EC:2.7.1.33]	2.7.1.33	Transferases; Transferring phosphorus-containing groups; Phosphotransferases with an alcohol group as acceptor; ATP:(R)-pantothenate 4'-phosphotransferase
gene0087	hslO	MULTISPECIES: Hsp33 family molecular chaperone HslO	RP01	Chromosome	Chromosome	+	84151	85020	870	MULTISPECIES: Hsp33 family molecular chaperone HslO	RecName: Full=33 kDa chaperonin; AltName: Full=Heat shock protein 33 homolog; Short=HSP33 [Bacillus licheniformis DSM 13 = ATCC 14580]	PF01430	HSP33	Hsp33 protein	COG1281	Redox-regulated molecular chaperone, HSP33 family	GO:0006457;GO:0005737;GO:0051082	protein folding;;cytoplasm;;unfolded protein binding	K04083	molecular chaperone Hsp33	-	-
gene0088	-	MULTISPECIES: peptidyl-prolyl cis-trans isomerase	RP01	Chromosome	Chromosome	+	85073	85963	891	MULTISPECIES: peptidyl-prolyl cis-trans isomerase	RecName: Full=Putative peptidyl-prolyl cis-trans isomerase YacD; Short=PPIase YacD; AltName: Full=Rotamase YacD; Flags: Precursor [Bacillus subtilis subsp. subtilis str. 168]	PF13145;PF00639;PF13616	Rotamase_2;Rotamase;Rotamase_3	PPIC-type PPIASE domain;PPIC-type PPIASE domain;PPIC-type PPIASE domain	COG0760	Peptidyl-prolyl isomerase, parvulin family	GO:0016021;GO:0003755	integral component of membrane;;peptidyl-prolyl cis-trans isomerase activity	-	-	-	-
gene0089	cysK	MULTISPECIES: cysteine synthase A	RP01	Chromosome	Chromosome	+	86039	86962	924	MULTISPECIES: cysteine synthase A	RecName: Full=Cysteine synthase; Short=CSase; AltName: Full=O-acetylserine (thiol)-lyase; Short=OAS-TL; AltName: Full=Superoxide-inducible protein 11; Short=SOI11 [Bacillus subtilis subsp. subtilis str. 168]	PF00291	PALP	Pyridoxal-phosphate dependent enzyme	COG0031	Cysteine synthase	GO:0006535;GO:0004124	cysteine biosynthetic process from serine;;cysteine synthase activity	K01738	cysteine synthase [EC:2.5.1.47]	2.5.1.47	Transferases; Transferring alkyl or aryl groups, other than methyl groups; Transferring alkyl or aryl groups, other than methyl groups (only sub-subclass identified to date); O-acetyl-L-serine:hydrogen-sulfide 2-amino-2-carboxyethyltransferase
gene0090	pabB	anthranilate synthase component I family protein	RP01	Chromosome	Chromosome	+	87158	88591	1434	anthranilate synthase component I family protein	RecName: Full=Aminodeoxychorismate synthase component 1; Short=ADC synthase; Short=ADCS; AltName: Full=4-amino-4-deoxychorismate synthase component 1 [Bacillus subtilis subsp. subtilis str. 168]	PF00425;PF04715	Chorismate_bind;Anth_synt_I_N	chorismate binding enzyme;Anthranilate synthase component I, N terminal region	COG0147	Anthranilate/para-aminobenzoate synthases component I	GO:0009058	biosynthetic process	K01665	para-aminobenzoate synthetase component I [EC:2.6.1.85]	2.6.1.85	Transferases; Transferring nitrogenous groups; Transaminases; chorismate:L-glutamine aminotransferase
gene0091	pabA	MULTISPECIES: aminodeoxychorismate/anthranilate synthase component II	RP01	Chromosome	Chromosome	+	88588	89172	585	MULTISPECIES: aminodeoxychorismate/anthranilate synthase component II	RecName: Full=Aminodeoxychorismate/anthranilate synthase component 2; Short=ADC synthase; Short=ADCS; AltName: Full=4-amino-4-deoxychorismate synthase component 2; AltName: Full=Aminodeoxychorismate synthase, glutamine amidotransferase component [Bacillus subtilis subsp. subtilis str. 168]	PF00117;PF07722	GATase;Peptidase_C26	Glutamine amidotransferase class-I;Peptidase C26	COG0512	Anthranilate/para-aminobenzoate synthase component II (glutamine amidotransferase)	GO:0006541	glutamine metabolic process	K01664	para-aminobenzoate synthetase component II [EC:2.6.1.85]	2.6.1.85	Transferases; Transferring nitrogenous groups; Transaminases; chorismate:L-glutamine aminotransferase
gene0092	pabC	MULTISPECIES: aminodeoxychorismate lyase	RP01	Chromosome	Chromosome	+	89169	90038	870	MULTISPECIES: aminodeoxychorismate lyase	RecName: Full=Aminodeoxychorismate lyase; AltName: Full=4-amino-4-deoxychorismate lyase; Short=ADC lyase; Short=ADCL [Bacillus subtilis subsp. subtilis str. 168]	PF01063	Aminotran_4	Amino-transferase class IV	COG0115	Branched-chain amino acid aminotransferase/4-amino-4-deoxychorismate lyase	GO:0046656;GO:0030170;GO:0008696	folic acid biosynthetic process;;pyridoxal phosphate binding;;4-amino-4-deoxychorismate lyase activity	K02619	4-amino-4-deoxychorismate lyase [EC:4.1.3.38]	4.1.3.38	Lyases; Carbon-carbon lyases; Oxo-acid-lyases; 4-amino-4-deoxychorismate pyruvate-lyase (4-aminobenzoate-forming)
gene0093	folP	MULTISPECIES: dihydropteroate synthase	RP01	Chromosome	Chromosome	+	90044	90901	858	MULTISPECIES: dihydropteroate synthase	RecName: Full=Dihydropteroate synthase; Short=DHPS; AltName: Full=Dihydropteroate pyrophosphorylase [Bacillus subtilis subsp. subtilis str. 168]	PF00809	Pterin_bind	Pterin binding enzyme	COG0294	Dihydropteroate synthase	GO:0046654;GO:0046656;GO:0046872;GO:0004156	tetrahydrofolate biosynthetic process;;folic acid biosynthetic process;;metal ion binding;;dihydropteroate synthase activity	K00796	dihydropteroate synthase [EC:2.5.1.15]	2.5.1.15	Transferases; Transferring alkyl or aryl groups, other than methyl groups; Transferring alkyl or aryl groups, other than methyl groups (only sub-subclass identified to date); (7,8-dihydropterin-6-yl)methyl-diphosphate:4-aminobenzoate 2-amino-4-hydroxy-7,8-dihydropteridine-6-methenyltransferase
gene0094	folB	dihydroneopterin aldolase	RP01	Chromosome	Chromosome	+	90873	91256	384	dihydroneopterin aldolase	RecName: Full=Dihydroneopterin aldolase; Short=DHNA; AltName: Full=7,8-dihydroneopterin aldolase [Bacillus subtilis subsp. subtilis str. 168]	PF02152	FolB	Dihydroneopterin aldolase	COG1539	Dihydroneopterin aldolase	GO:0046654;GO:0046656;GO:0004150	tetrahydrofolate biosynthetic process;;folic acid biosynthetic process;;dihydroneopterin aldolase activity	K01633	7,8-dihydroneopterin aldolase/epimerase/oxygenase [EC:4.1.2.25 5.1.99.8 1.13.11.81]	4.1.2.25;1.13.11.81;5.1.99.8	Lyases; Carbon-carbon lyases; Aldehyde-lyases; 7,8-dihydroneopterin glycolaldehyde-lyase [6-(hydroxymethyl)-7,8-dihydropterin-forming]|Oxidoreductases; Acting on single donors with incorporation of molecular oxygen (oxygenases); With incorporation of two atoms of oxygen; 7,8-dihydroneopterin:oxygen oxidoreductase|Isomerases; Racemases and epimerases; Acting on other compounds; 7,8-dihydroneopteri…
gene0095	folK	MULTISPECIES: 2-amino-4-hydroxy-6-hydroxymethyldihydropteridine diphosphokinase	RP01	Chromosome	Chromosome	+	91253	91753	501	MULTISPECIES: 2-amino-4-hydroxy-6-hydroxymethyldihydropteridine diphosphokinase	RecName: Full=2-amino-4-hydroxy-6-hydroxymethyldihydropteridine pyrophosphokinase; AltName: Full=6-hydroxymethyl-7,8-dihydropterin pyrophosphokinase; Short=PPPK; AltName: Full=7,8-dihydro-6-hydroxymethylpterin-pyrophosphokinase; Short=HPPK [Bacillus subtilis subsp. subtilis str. 168]	PF01288	HPPK	7,8-dihydro-6-hydroxymethylpterin-pyrophosphokinase (HPPK)	COG0801	7,8-dihydro-6-hydroxymethylpterin pyrophosphokinase (folate biosynthesis)	GO:0046654;GO:0046656;GO:0005524;GO:0016301;GO:0003848	tetrahydrofolate biosynthetic process;;folic acid biosynthetic process;;ATP binding;;kinase activity;;2-amino-4-hydroxy-6-hydroxymethyldihydropteridine diphosphokinase activity	K00950	2-amino-4-hydroxy-6-hydroxymethyldihydropteridine diphosphokinase [EC:2.7.6.3]	2.7.6.3	Transferases; Transferring phosphorus-containing groups; Diphosphotransferases; ATP:6-hydroxymethyl-7,8-dihydropterin 6'-diphosphotransferase
gene0096	-	MULTISPECIES: helix-turn-helix transcriptional regulator	RP01	Chromosome	Chromosome	+	91705	91914	210	MULTISPECIES: helix-turn-helix transcriptional regulator	RecName: Full=Uncharacterized HTH-type transcriptional regulator YazB [Bacillus subtilis subsp. subtilis str. 168]	PF01381;PF13560;PF12844	HTH_3;HTH_31;HTH_19	Helix-turn-helix;Helix-turn-helix domain;Helix-turn-helix domain	COG1396	Transcriptional regulator, contains XRE-family HTH domain	GO:0003677	DNA binding	-	-	-	-
gene0097	-	MULTISPECIES: tRNA dihydrouridine synthase DusB	RP01	Chromosome	Chromosome	+	91931	92932	1002	MULTISPECIES: tRNA dihydrouridine synthase DusB	RecName: Full=Probable tRNA-dihydrouridine synthase 1 [Bacillus subtilis subsp. subtilis str. 168]	PF01207;PF00977	Dus;His_biosynth	Dihydrouridine synthase (Dus);Histidine biosynthesis protein	COG0042	tRNA-dihydrouridine synthase	GO:0003723;GO:0050660;GO:0017150	RNA binding;;flavin adenine dinucleotide binding;;tRNA dihydrouridine synthase activity	-	-	-	-
gene0098	lysS	Lysyl-tRNA synthetase (class II)	RP01	Chromosome	Chromosome	+	93014	94516	1503	Lysyl-tRNA synthetase (class II)	RecName: Full=Lysine--tRNA ligase; AltName: Full=Lysyl-tRNA synthetase; Short=LysRS [Bacillus subtilis subsp. subtilis str. 168]	PF00152;PF01336	tRNA-synt_2;tRNA_anti-codon	tRNA synthetases class II (D, K and N);OB-fold nucleic acid binding domain	COG1190	Lysyl-tRNA synthetase (class II)	GO:0006430;GO:0005737;GO:0005524;GO:0000287;GO:0003676;GO:0004824	lysyl-tRNA aminoacylation;;cytoplasm;;ATP binding;;magnesium ion binding;;nucleic acid binding;;lysine-tRNA ligase activity	K04567	lysyl-tRNA synthetase, class II [EC:6.1.1.6]	6.1.1.6	Ligases; Forming carbon-oxygen bonds; Ligases forming aminoacyl-tRNA and related compounds; L-lysine:tRNALys ligase (AMP-forming)
gene0114	ctsR	MULTISPECIES: CtsR family transcriptional regulator	RP01	Chromosome	Chromosome	+	105624	106088	465	MULTISPECIES: CtsR family transcriptional regulator	RecName: Full=Transcriptional regulator CtsR; AltName: Full=Class three stress gene repressor [Bacillus subtilis subsp. subtilis str. 168]	PF05848;PF17727	CtsR;CtsR_C	CtsR N-terminal HTH domain;CtsR C-terminal dimerization domain	COG4463	Transcriptional regulator CtsR	GO:0006355;GO:0003677	regulation of transcription, DNA-templated;;DNA binding	K03708	transcriptional regulator of stress and heat shock response	-	-
gene0115	mcsA	McsA	RP01	Chromosome	Chromosome	+	106226	106657	432	McsA	RecName: Full=Protein-arginine kinase activator protein [Bacillus subtilis subsp. subtilis str. 168]	PF02151	UVR	UvrB/uvrC motif	COG3880	Protein-arginine kinase activator protein McsA	GO:0016301	kinase activity	K19411	protein arginine kinase activator	-	-
gene0116	mcsB	MULTISPECIES: protein arginine kinase	RP01	Chromosome	Chromosome	+	106657	107748	1092	MULTISPECIES: protein arginine kinase	RecName: Full=Protein-arginine kinase [Bacillus licheniformis DSM 13 = ATCC 14580]	PF00217	ATP-gua_Ptrans	ATP:guanido phosphotransferase, C-terminal catalytic domain	COG3869	Protein-arginine kinase McsB	GO:0046314;GO:0005524;GO:0004672;GO:0004111	phosphocreatine biosynthetic process;;ATP binding;;protein kinase activity;;creatine kinase activity	K19405	protein arginine kinase [EC:2.7.14.1]	2.7.14.1	Transferases; Transferring phosphorus-containing groups; Protein-arginine kinases; ATP:[protein]-L-arginine Nomega-phosphotransferase
gene0117	clpC	MULTISPECIES: ATP-dependent protease ATP-binding subunit ClpC	RP01	Chromosome	Chromosome	+	107745	110177	2433	MULTISPECIES: ATP-dependent protease ATP-binding subunit ClpC	RecName: Full=Negative regulator of genetic competence ClpC/MecB [Bacillus subtilis subsp. subtilis str. 168]	PF07724;PF02861;PF02861;PF17871;PF10431;PF00004;PF00004;PF07728;PF00158;PF02151	AAA_2;Clp_N;Clp_N;AAA_lid_9;ClpB_D2-small;AAA;AAA;AAA_5;Sigma54_activat;UVR	AAA domain (Cdc48 subfamily);Clp amino terminal domain, pathogenicity island component;Clp amino terminal domain, pathogenicity island component;AAA lid domain;C-terminal, D2-small domain, of ClpB protein;ATPase family associated with various cellular activities (AAA);ATPase family associated with various cellular activities (AAA);AAA domain (dynein-related subfamily);Sigma-54 interaction domain;…	COG0542	ATP-dependent Clp protease, ATP-binding subunit ClpA	GO:0005524;GO:0016887;GO:0008233	ATP binding;;ATP hydrolysis activity;;peptidase activity	K03696	ATP-dependent Clp protease ATP-binding subunit ClpC	-	-
gene0118	radA	DNA repair protein RadA	RP01	Chromosome	Chromosome	+	110353	111636	1284	DNA repair protein RadA	RecName: Full=DNA repair protein RadA; AltName: Full=Branch migration protein RadA; AltName: Full=DNA repair protein Sms [Bacillus subtilis subsp. subtilis str. 168]	PF13481;PF06745;PF13541;PF03796;PF05362	AAA_25;ATPase;ChlI;DnaB_C;Lon_C	AAA domain;KaiC;Subunit ChlI of Mg-chelatase;DnaB-like helicase C terminal domain;Lon protease (S16) C-terminal proteolytic domain	COG1066	DNA repair protein RadA/Sms, contains AAA+ ATPase domain	GO:0000725;GO:0005524;GO:0046872;GO:0016787;GO:0003684;GO:0008094	recombinational repair;;ATP binding;;metal ion binding;;hydrolase activity;;damaged DNA binding;;ATP-dependent activity, acting on DNA	K04485	DNA repair protein RadA/Sms	-	-
gene0119	disA	MULTISPECIES: DNA integrity scanning diadenylate cyclase DisA	RP01	Chromosome	Chromosome	+	111640	112716	1077	MULTISPECIES: DNA integrity scanning diadenylate cyclase DisA	RecName: Full=DNA integrity scanning protein DisA; AltName: Full=Cyclic di-AMP synthase; Short=c-di-AMP synthase; AltName: Full=Diadenylate cyclase [Bacillus licheniformis DSM 13 = ATCC 14580]	PF10635;PF02457	DisA-linker;DAC	DisA bacterial checkpoint controller linker region;DisA bacterial checkpoint controller nucleotide-binding	COG1623	c-di-AMP synthetase DisA, contains DisA_N, linker and DNA-binding domains	GO:0006281;GO:0019932;GO:0005524;GO:0003677;GO:0016779	DNA repair;;second-messenger-mediated signaling;;ATP binding;;DNA binding;;nucleotidyltransferase activity	K07067	diadenylate cyclase [EC:2.7.7.85]	2.7.7.85	Transferases; Transferring phosphorus-containing groups; Nucleotidyltransferases; ATP:ATP adenylyltransferase (cyclizing)
gene0120	-	MULTISPECIES: PIN/TRAM domain-containing protein	RP01	Chromosome	Chromosome	+	112848	113936	1089	MULTISPECIES: PIN/TRAM domain-containing protein	RecName: Full=Uncharacterized PIN and TRAM-domain containing protein YacL; AltName: Full=Putative RNase YacL [Bacillus subtilis subsp. subtilis str. 168]	-	-	-	COG4956	Uncharacterized conserved protein YacL, contains PIN and TRAM domains	GO:0016021	integral component of membrane	-	-	-	-
gene0121	ispD	MULTISPECIES: 2-C-methyl-D-erythritol 4-phosphate cytidylyltransferase	RP01	Chromosome	Chromosome	+	113953	114648	696	MULTISPECIES: 2-C-methyl-D-erythritol 4-phosphate cytidylyltransferase	RecName: Full=2-C-methyl-D-erythritol 4-phosphate cytidylyltransferase; AltName: Full=4-diphosphocytidyl-2C-methyl-D-erythritol synthase; AltName: Full=MEP cytidylyltransferase; Short=MCT [Bacillus licheniformis DSM 13 = ATCC 14580]	PF01128;PF12804	IspD;NTP_transf_3	2-C-methyl-D-erythritol 4-phosphate cytidylyltransferase;MobA-like NTP transferase domain	COG1211	2-C-methyl-D-erythritol 4-phosphate cytidylyltransferase	GO:0016114;GO:0019288;GO:0050518	terpenoid biosynthetic process;;isopentenyl diphosphate biosynthetic process, methylerythritol 4-phosphate pathway;;2-C-methyl-D-erythritol 4-phosphate cytidylyltransferase activity	K00991	2-C-methyl-D-erythritol 4-phosphate cytidylyltransferase [EC:2.7.7.60]	2.7.7.60	Transferases; Transferring phosphorus-containing groups; Nucleotidyltransferases; CTP:2-C-methyl-D-erythritol 4-phosphate cytidylyltransferase
gene0122	ispF	MULTISPECIES: 2-C-methyl-D-erythritol 2,4-cyclodiphosphate synthase	RP01	Chromosome	Chromosome	+	114641	115117	477	MULTISPECIES: 2-C-methyl-D-erythritol 2,4-cyclodiphosphate synthase	RecName: Full=2-C-methyl-D-erythritol 2,4-cyclodiphosphate synthase; Short=MECDP-synthase; Short=MECPP-synthase; Short=MECPS [Bacillus licheniformis DSM 13 = ATCC 14580]	PF02542	YgbB	YgbB family	COG0245	2C-methyl-D-erythritol 2,4-cyclodiphosphate synthase	GO:0016114;GO:0019288;GO:0046872;GO:0008685	terpenoid biosynthetic process;;isopentenyl diphosphate biosynthetic process, methylerythritol 4-phosphate pathway;;metal ion binding;;2-C-methyl-D-erythritol 2,4-cyclodiphosphate synthase activity	K01770	2-C-methyl-D-erythritol 2,4-cyclodiphosphate synthase [EC:4.6.1.12]	4.6.1.12	Lyases; Phosphorus-oxygen lyases; Phosphorus-oxygen lyases (only sub-subclass identified to date); 2-phospho-4-(cytidine 5'-diphospho)-2-C-methyl-D-erythritol CMP-lyase (cyclizing; 2-C-methyl-D-erythritol 2,4-cyclodiphosphate-forming)
gene0123	gltX	MULTISPECIES: glutamate--tRNA ligase	RP01	Chromosome	Chromosome	+	115199	116656	1458	MULTISPECIES: glutamate--tRNA ligase	RecName: Full=Glutamate--tRNA ligase; AltName: Full=Glutamyl-tRNA synthetase; Short=GluRS [Bacillus licheniformis DSM 13 = ATCC 14580]	PF00749;PF19269	tRNA-synt_1c;Anticodon_2	tRNA synthetases class I (E and Q), catalytic domain;Anticodon binding domain	COG0008	Glutamyl- or glutaminyl-tRNA synthetase	-	-	K09698	nondiscriminating glutamyl-tRNA synthetase [EC:6.1.1.24]	6.1.1.24	Ligases; Forming carbon-oxygen bonds; Ligases forming aminoacyl-tRNA and related compounds; L-glutamate:tRNAGlx ligase (AMP-forming)
gene0124	cysE	MULTISPECIES: serine O-acetyltransferase	RP01	Chromosome	Chromosome	+	116962	117612	651	MULTISPECIES: serine O-acetyltransferase	RecName: Full=Serine acetyltransferase; Short=SAT [Bacillus licheniformis DSM 13 = ATCC 14580]	PF00132;PF00132;PF00132	Hexapep;Hexapep;Hexapep	Bacterial transferase hexapeptide (six repeats);Bacterial transferase hexapeptide (six repeats);Bacterial transferase hexapeptide (six repeats)	COG1045	Serine acetyltransferase	GO:0006535;GO:0005737;GO:0009001	cysteine biosynthetic process from serine;;cytoplasm;;serine O-acetyltransferase activity	K00640	serine O-acetyltransferase [EC:2.3.1.30]	2.3.1.30	Transferases; Acyltransferases; Transferring groups other than aminoacyl groups; acetyl-CoA:L-serine O-acetyltransferase
gene0125	cysS	MULTISPECIES: cysteine--tRNA ligase	RP01	Chromosome	Chromosome	+	117609	119012	1404	MULTISPECIES: cysteine--tRNA ligase	RecName: Full=Cysteine--tRNA ligase; AltName: Full=Cysteinyl-tRNA synthetase; Short=CysRS [Bacillus licheniformis DSM 13 = ATCC 14580]	PF01406;PF09190;PF09334;PF00133	tRNA-synt_1e;DALR_2;tRNA-synt_1g;tRNA-synt_1	tRNA synthetases class I (C) catalytic domain;DALR domain;tRNA synthetases class I (M);tRNA synthetases class I (I, L, M and V)	COG0215	Cysteinyl-tRNA synthetase	-	-	K01883	cysteinyl-tRNA synthetase [EC:6.1.1.16]	6.1.1.16	Ligases; Forming carbon-oxygen bonds; Ligases forming aminoacyl-tRNA and related compounds; L-cysteine:tRNACys ligase (AMP-forming)
gene0126	-	MULTISPECIES: Mini-ribonuclease 3	RP01	Chromosome	Chromosome	+	119015	119431	417	MULTISPECIES: Mini-ribonuclease 3	RecName: Full=Mini-ribonuclease 3; Short=Mini-3; Short=Mini-RNase 3; AltName: Full=Mini-RNase III; Short=Mini-III [Bacillus subtilis subsp. subtilis str. 168]	PF00636	Ribonuclease_3	Ribonuclease III domain	COG1939	23S rRNA maturation mini-RNase III	GO:0006364;GO:0005737;GO:0019843;GO:0004525	rRNA processing;;cytoplasm;;rRNA binding;;ribonuclease III activity	K11145	ribonuclease III family protein [EC:3.1.26.-]	-	-
gene0127	rlmB	MULTISPECIES: 23S rRNA (guanosine(2251)-2'-O)-methyltransferase RlmB	RP01	Chromosome	Chromosome	+	119428	120177	750	MULTISPECIES: 23S rRNA (guanosine(2251)-2'-O)-methyltransferase RlmB	RecName: Full=Putative TrmH family tRNA/rRNA methyltransferase YacO [Bacillus subtilis subsp. subtilis str. 168]	PF00588;PF08032	SpoU_methylase;SpoU_sub_bind	SpoU rRNA Methylase family;RNA 2'-O ribose methyltransferase substrate binding	COG0566	tRNA G18 (ribose-2'-O)-methylase SpoU	GO:0006396;GO:0003723;GO:0008173	RNA processing;;RNA binding;;RNA methyltransferase activity	K03218	23S rRNA (guanosine2251-2'-O)-methyltransferase [EC:2.1.1.185]	2.1.1.185	Transferases; Transferring one-carbon groups; Methyltransferases; S-adenosyl-L-methionine:23S rRNA (guanosine2251-2'-O-)-methyltransferase
gene0128	-	MULTISPECIES: ribosome-dependent mRNA decay endonuclease Rae1/YacP	RP01	Chromosome	Chromosome	+	120183	120695	513	MULTISPECIES: ribosome-dependent mRNA decay endonuclease Rae1/YacP	RecName: Full=Uncharacterized protein YacP [Bacillus subtilis subsp. subtilis str. 168]	PF05991	NYN_YacP	YacP-like NYN domain	COG3688	EndoRNase involved in mRNA decay, NYN (Nedd4-BP1/Rae1/YacP nuclease) family, contains PIN domain	GO:0004519	endonuclease activity	K06962	uncharacterized protein	-	-
gene0129	sigH	MULTISPECIES: RNA polymerase sporulation sigma factor SigH	RP01	Chromosome	Chromosome	+	120759	121430	672	MULTISPECIES: RNA polymerase sporulation sigma factor SigH	RecName: Full=RNA polymerase sigma-H factor; AltName: Full=Sigma-30 [Bacillus licheniformis]	PF04542;PF08281	Sigma70_r2;Sigma70_r4_2	Sigma-70 region 2;Sigma-70, region 4	COG1595	DNA-directed RNA polymerase specialized sigma subunit, sigma24 family	GO:0030435;GO:0006352;GO:0003677;GO:0016987;GO:0003899	sporulation resulting in formation of a cellular spore;;DNA-templated transcription, initiation;;DNA binding;;sigma factor activity;;DNA-directed 5'-3' RNA polymerase activity	K03091	RNA polymerase sporulation-specific sigma factor	-	-
gene0130	secE	MULTISPECIES: preprotein translocase subunit SecE	RP01	Chromosome	Chromosome	+	121699	121878	180	MULTISPECIES: preprotein translocase subunit SecE	RecName: Full=Protein translocase subunit SecE [Bacillus licheniformis]	PF00584	SecE	SecE/Sec61-gamma subunits of protein translocation complex	COG0690	Preprotein translocase subunit SecE	GO:0009306;GO:0006605;GO:0065002;GO:0043952;GO:0016021;GO:0005886;GO:0015450	protein secretion;;protein targeting;;intracellular protein transmembrane transport;;protein transport by the Sec complex;;integral component of membrane;;plasma membrane;;protein-transporting ATPase activity	K03073	preprotein translocase subunit SecE	-	-
gene0131	nusG	transcription antitermination factor NusG	RP01	Chromosome	Chromosome	+	122049	122588	540	transcription antitermination factor NusG	RecName: Full=Transcription termination/antitermination protein NusG [Bacillus subtilis subsp. subtilis str. 168]	PF02357;PF00467	NusG;KOW	Transcription termination factor nusG;KOW motif	COG0250	Transcription termination/antitermination protein NusG	GO:0006353;GO:0031564;GO:0032784;GO:0006354	DNA-templated transcription, termination;;transcription antitermination;;regulation of DNA-templated transcription, elongation;;DNA-templated transcription, elongation	K02601	transcription termination/antitermination protein NusG	-	-
gene0132	rplK	MULTISPECIES: 50S ribosomal protein L11	RP01	Chromosome	Chromosome	+	122758	123183	426	MULTISPECIES: 50S ribosomal protein L11	RecName: Full=50S ribosomal protein L11 [Bacillus licheniformis DSM 13 = ATCC 14580]	PF03946;PF00298	Ribosomal_L11_N;Ribosomal_L11	Ribosomal protein L11, N-terminal domain;Ribosomal protein L11, RNA binding domain	COG0080	Ribosomal protein L11	GO:0006412;GO:0046677;GO:0005840;GO:0015934;GO:0022625;GO:0003735;GO:0070180	translation;;response to antibiotic;;ribosome;;large ribosomal subunit;;cytosolic large ribosomal subunit;;structural constituent of ribosome;;large ribosomal subunit rRNA binding	K02867	large subunit ribosomal protein L11	-	-
gene0133	rplA	MULTISPECIES: 50S ribosomal protein L1	RP01	Chromosome	Chromosome	+	123285	123983	699	MULTISPECIES: 50S ribosomal protein L1	RecName: Full=50S ribosomal protein L1 [Bacillus licheniformis DSM 13 = ATCC 14580]	PF00687	Ribosomal_L1	Ribosomal protein L1p/L10e family	COG0081	Ribosomal protein L1	GO:0006412;GO:0006417;GO:0015934;GO:0003735;GO:0019843;GO:0000049	translation;;regulation of translation;;large ribosomal subunit;;structural constituent of ribosome;;rRNA binding;;tRNA binding	K02863	large subunit ribosomal protein L1	-	-
gene0134	rplJ	MULTISPECIES: 50S ribosomal protein L10	RP01	Chromosome	Chromosome	+	124245	124745	501	MULTISPECIES: 50S ribosomal protein L10	RecName: Full=50S ribosomal protein L10 [Bacillus licheniformis DSM 13 = ATCC 14580]	PF00466	Ribosomal_L10	Ribosomal protein L10	COG0244	Ribosomal protein L10	GO:0006412;GO:0042254;GO:0015934;GO:0003735;GO:0070180	translation;;ribosome biogenesis;;large ribosomal subunit;;structural constituent of ribosome;;large ribosomal subunit rRNA binding	K02864	large subunit ribosomal protein L10	-	-
gene0135	rplL	MULTISPECIES: 50S ribosomal protein L7/L12	RP01	Chromosome	Chromosome	+	124790	125161	372	MULTISPECIES: 50S ribosomal protein L7/L12	RecName: Full=50S ribosomal protein L7/L12 [Bacillus licheniformis DSM 13 = ATCC 14580]	PF00542;PF16320	Ribosomal_L12;Ribosomal_L12_N	Ribosomal protein L7/L12 C-terminal domain;Ribosomal protein L7/L12 dimerisation domain	COG0222	Ribosomal protein L7/L12	GO:0006412;GO:0005840;GO:0003735	translation;;ribosome;;structural constituent of ribosome	K02935	large subunit ribosomal protein L7/L12	-	-
gene0136	rsmC	MULTISPECIES: class I SAM-dependent methyltransferase	RP01	Chromosome	Chromosome	+	125301	125906	606	MULTISPECIES: class I SAM-dependent methyltransferase	RecName: Full=Uncharacterized protein YbxB; AltName: Full=ORF23; AltName: Full=P23 [Bacillus subtilis subsp. subtilis str. 168]	PF05175;PF13847;PF13649;PF06325;PF05958	MTS;Methyltransf_31;Methyltransf_25;PrmA;tRNA_U5-meth_tr	Methyltransferase small domain;Methyltransferase domain;Methyltransferase domain;Ribosomal protein L11 methyltransferase (PrmA);tRNA (Uracil-5-)-methyltransferase	COG2813	16S rRNA G1207 methylase RsmC	-	-	K00564	16S rRNA (guanine1207-N2)-methyltransferase [EC:2.1.1.172]	2.1.1.172	Transferases; Transferring one-carbon groups; Methyltransferases; S-adenosyl-L-methionine:16S rRNA (guanine1207-N2)-methyltransferase
gene0137	rpoB	MULTISPECIES: DNA-directed RNA polymerase subunit beta	RP01	Chromosome	Chromosome	+	126157	129738	3582	MULTISPECIES: DNA-directed RNA polymerase subunit beta	RecName: Full=DNA-directed RNA polymerase subunit beta; Short=RNAP subunit beta; AltName: Full=RNA polymerase subunit beta; AltName: Full=Transcriptase subunit beta [Bacillus licheniformis DSM 13 = ATCC 14580]	PF00562;PF04561;PF04561;PF04563;PF04565;PF04560;PF10385	RNA_pol_Rpb2_6;RNA_pol_Rpb2_2;RNA_pol_Rpb2_2;RNA_pol_Rpb2_1;RNA_pol_Rpb2_3;RNA_pol_Rpb2_7;RNA_pol_Rpb2_45	RNA polymerase Rpb2, domain 6;RNA polymerase Rpb2, domain 2;RNA polymerase Rpb2, domain 2;RNA polymerase beta subunit;RNA polymerase Rpb2, domain 3;RNA polymerase Rpb2, domain 7;RNA polymerase beta subunit external 1 domain	COG0085	DNA-directed RNA polymerase, beta subunit/140 kD subunit	GO:0006351;GO:0003677;GO:0003899;GO:0032549	transcription, DNA-templated;;DNA binding;;DNA-directed 5'-3' RNA polymerase activity;;ribonucleoside binding	K03043	DNA-directed RNA polymerase subunit beta [EC:2.7.7.6]	2.7.7.6	Transferases; Transferring phosphorus-containing groups; Nucleotidyltransferases; nucleoside-triphosphate:RNA nucleotidyltransferase (DNA-directed)
gene0138	rpoC	MULTISPECIES: DNA-directed RNA polymerase subunit beta'	RP01	Chromosome	Chromosome	+	129798	133397	3600	MULTISPECIES: DNA-directed RNA polymerase subunit beta'	RecName: Full=DNA-directed RNA polymerase subunit beta'; Short=RNAP subunit beta'; AltName: Full=RNA polymerase subunit beta'; AltName: Full=Transcriptase subunit beta' [Bacillus licheniformis DSM 13 = ATCC 14580]	PF04997;PF04998;PF00623;PF00623;PF04983;PF05000	RNA_pol_Rpb1_1;RNA_pol_Rpb1_5;RNA_pol_Rpb1_2;RNA_pol_Rpb1_2;RNA_pol_Rpb1_3;RNA_pol_Rpb1_4	RNA polymerase Rpb1, domain 1;RNA polymerase Rpb1, domain 5;RNA polymerase Rpb1, domain 2;RNA polymerase Rpb1, domain 2;RNA polymerase Rpb1, domain 3;RNA polymerase Rpb1, domain 4	COG0086	DNA-directed RNA polymerase, beta' subunit/160 kD subunit	GO:0006351;GO:0003677;GO:0008270;GO:0000287;GO:0003899	transcription, DNA-templated;;DNA binding;;zinc ion binding;;magnesium ion binding;;DNA-directed 5'-3' RNA polymerase activity	K03046	DNA-directed RNA polymerase subunit beta' [EC:2.7.7.6]	2.7.7.6	Transferases; Transferring phosphorus-containing groups; Nucleotidyltransferases; nucleoside-triphosphate:RNA nucleotidyltransferase (DNA-directed)
gene0139	rplGB	MULTISPECIES: 50S ribosomal protein L7ae-like protein	RP01	Chromosome	Chromosome	+	133518	133766	249	MULTISPECIES: 50S ribosomal protein L7ae-like protein	RecName: Full=Ribosome-associated protein L7Ae-like [Bacillus subtilis subsp. subtilis str. 168]	PF01248	Ribosomal_L7Ae	Ribosomal protein L7Ae/L30e/S12e/Gadd45 family	COG1358	Ribosomal protein L7Ae or related RNA K-turn-binding protein	GO:0006412;GO:0005840;GO:0003735	translation;;ribosome;;structural constituent of ribosome	K07590	large subunit ribosomal protein L7A	-	-
gene0140	rpsL	MULTISPECIES: 30S ribosomal protein S12	RP01	Chromosome	Chromosome	+	133871	134287	417	MULTISPECIES: 30S ribosomal protein S12	RecName: Full=30S ribosomal protein S12 [Bacillus licheniformis DSM 13 = ATCC 14580]	PF00164	Ribosom_S12_S23	Ribosomal protein S12/S23	COG0048	Ribosomal protein S12	GO:0006412;GO:0015935;GO:0003735;GO:0019843;GO:0000049	translation;;small ribosomal subunit;;structural constituent of ribosome;;rRNA binding;;tRNA binding	K02950	small subunit ribosomal protein S12	-	-
gene0141	rpsG	MULTISPECIES: 30S ribosomal protein S7	RP01	Chromosome	Chromosome	+	134453	134923	471	MULTISPECIES: 30S ribosomal protein S7	RecName: Full=30S ribosomal protein S7 [Bacillus licheniformis DSM 13 = ATCC 14580]	PF00177	Ribosomal_S7	Ribosomal protein S7p/S5e	COG0049	Ribosomal protein S7	GO:0006412;GO:0015935;GO:0003735;GO:0019843;GO:0000049	translation;;small ribosomal subunit;;structural constituent of ribosome;;rRNA binding;;tRNA binding	K02992	small subunit ribosomal protein S7	-	-
gene0142	fusA	MULTISPECIES: elongation factor G	RP01	Chromosome	Chromosome	+	134973	137051	2079	MULTISPECIES: elongation factor G	RecName: Full=Elongation factor G; Short=EF-G [Bacillus licheniformis DSM 13 = ATCC 14580]	PF00009;PF03764;PF14492;PF00679;PF03144	GTP_EFTU;EFG_IV;EFG_III;EFG_C;GTP_EFTU_D2	Elongation factor Tu GTP binding domain;Elongation factor G, domain IV;Elongation Factor G, domain III;Elongation factor G C-terminus;Elongation factor Tu domain 2	COG0480	Translation elongation factor EF-G, a GTPase	GO:0005737;GO:0005525;GO:0003924;GO:0003746	cytoplasm;;GTP binding;;GTPase activity;;translation elongation factor activity	K02355	elongation factor G	-	-
gene0143	tuf	MULTISPECIES: elongation factor Tu	RP01	Chromosome	Chromosome	+	137171	138361	1191	MULTISPECIES: elongation factor Tu	RecName: Full=Elongation factor Tu; Short=EF-Tu; AltName: Full=P-40 [Bacillus subtilis subsp. subtilis str. 168]	PF00009;PF03143;PF03144	GTP_EFTU;GTP_EFTU_D3;GTP_EFTU_D2	Elongation factor Tu GTP binding domain;Elongation factor Tu C-terminal domain;Elongation factor Tu domain 2	COG0050	Translation elongation factor EF-Tu, a GTPase	GO:0005737;GO:0005525;GO:0003924;GO:0003746	cytoplasm;;GTP binding;;GTPase activity;;translation elongation factor activity	K02358	elongation factor Tu	-	-
gene0144	rpsJ	MULTISPECIES: 30S ribosomal protein S10	RP01	Chromosome	Chromosome	+	138652	138960	309	MULTISPECIES: 30S ribosomal protein S10	RecName: Full=30S ribosomal protein S10 [Bacillus velezensis FZB42] >lcl|A8F984.1 RecName: Full=30S ribosomal protein S10 [Bacillus pumilus SAFR-032] >lcl|P21471.4 RecName: Full=30S ribosomal protein S10; AltName: Full=BS13 [Bacillus subtilis subsp. subtilis str. 168] >lcl|Q65PA8.1 RecName: Full=30S ribosomal protein S10 [Bacillus licheniformis DSM 13 = ATCC 14580]	PF00338	Ribosomal_S10	Ribosomal protein S10p/S20e	COG0051	Ribosomal protein S10	GO:0006412;GO:0005840;GO:0015935;GO:0003735;GO:0000049	translation;;ribosome;;small ribosomal subunit;;structural constituent of ribosome;;tRNA binding	K02946	small subunit ribosomal protein S10	-	-
gene0145	rplC	MULTISPECIES: 50S ribosomal protein L3	RP01	Chromosome	Chromosome	+	138999	139628	630	MULTISPECIES: 50S ribosomal protein L3	RecName: Full=50S ribosomal protein L3 [Bacillus licheniformis DSM 13 = ATCC 14580]	PF00297	Ribosomal_L3	Ribosomal protein L3	COG0087	Ribosomal protein L3	GO:0006412;GO:0005840;GO:0003735;GO:0019843	translation;;ribosome;;structural constituent of ribosome;;rRNA binding	K02906	large subunit ribosomal protein L3	-	-
gene0146	rplD	MULTISPECIES: 50S ribosomal protein L4	RP01	Chromosome	Chromosome	+	139656	140279	624	MULTISPECIES: 50S ribosomal protein L4	RecName: Full=50S ribosomal protein L4 [Bacillus licheniformis DSM 13 = ATCC 14580]	PF00573	Ribosomal_L4	Ribosomal protein L4/L1 family	COG0088	Ribosomal protein L4	GO:0006412;GO:0005840;GO:0003735;GO:0019843	translation;;ribosome;;structural constituent of ribosome;;rRNA binding	K02926	large subunit ribosomal protein L4	-	-
gene0147	rplW	MULTISPECIES: 50S ribosomal protein L23	RP01	Chromosome	Chromosome	+	140279	140566	288	MULTISPECIES: 50S ribosomal protein L23	RecName: Full=50S ribosomal protein L23 [Bacillus licheniformis DSM 13 = ATCC 14580]	PF00276	Ribosomal_L23	Ribosomal protein L23	COG0089	Ribosomal protein L23	GO:0006412;GO:0005840;GO:0003735;GO:0019843	translation;;ribosome;;structural constituent of ribosome;;rRNA binding	K02892	large subunit ribosomal protein L23	-	-
gene0148	rplB	MULTISPECIES: 50S ribosomal protein L2	RP01	Chromosome	Chromosome	+	140598	141431	834	MULTISPECIES: 50S ribosomal protein L2	RecName: Full=50S ribosomal protein L2 [Bacillus velezensis FZB42]	PF03947;PF00181	Ribosomal_L2_C;Ribosomal_L2	Ribosomal Proteins L2, C-terminal domain;Ribosomal Proteins L2, RNA binding domain	COG0090	Ribosomal protein L2	GO:0006412;GO:0015934;GO:0003735;GO:0016740;GO:0019843	translation;;large ribosomal subunit;;structural constituent of ribosome;;transferase activity;;rRNA binding	K02886	large subunit ribosomal protein L2	-	-
gene0149	rpsS	MULTISPECIES: 30S ribosomal protein S19	RP01	Chromosome	Chromosome	+	141489	141767	279	MULTISPECIES: 30S ribosomal protein S19	RecName: Full=30S ribosomal protein S19 [Bacillus licheniformis DSM 13 = ATCC 14580]	PF00203	Ribosomal_S19	Ribosomal protein S19	COG0185	Ribosomal protein S19	GO:0006412;GO:0015935;GO:0003735;GO:0019843	translation;;small ribosomal subunit;;structural constituent of ribosome;;rRNA binding	K02965	small subunit ribosomal protein S19	-	-
gene0150	rplV	MULTISPECIES: 50S ribosomal protein L22	RP01	Chromosome	Chromosome	+	141785	142129	345	MULTISPECIES: 50S ribosomal protein L22	RecName: Full=50S ribosomal protein L22 [Bacillus licheniformis DSM 13 = ATCC 14580]	PF00237	Ribosomal_L22	Ribosomal protein L22p/L17e	COG0091	Ribosomal protein L22	GO:0006412;GO:0015934;GO:0003735;GO:0019843	translation;;large ribosomal subunit;;structural constituent of ribosome;;rRNA binding	K02890	large subunit ribosomal protein L22	-	-
gene0151	rpsC	MULTISPECIES: 30S ribosomal protein S3	RP01	Chromosome	Chromosome	+	142133	142789	657	MULTISPECIES: 30S ribosomal protein S3	RecName: Full=30S ribosomal protein S3 [Bacillus licheniformis DSM 13 = ATCC 14580]	PF00189;PF07650	Ribosomal_S3_C;KH_2	Ribosomal protein S3, C-terminal domain;KH domain	COG0092	Ribosomal protein S3	GO:0006412;GO:0005840;GO:0003735;GO:0019843;GO:0003729	translation;;ribosome;;structural constituent of ribosome;;rRNA binding;;mRNA binding	K02982	small subunit ribosomal protein S3	-	-
gene0152	rplP	MULTISPECIES: 50S ribosomal protein L16	RP01	Chromosome	Chromosome	+	142791	143225	435	MULTISPECIES: 50S ribosomal protein L16	RecName: Full=50S ribosomal protein L16 [Bacillus licheniformis DSM 13 = ATCC 14580]	PF00252	Ribosomal_L16	Ribosomal protein L16p/L10e	COG0197	Ribosomal protein L16/L10AE	GO:0006412;GO:0005840;GO:0003735;GO:0019843;GO:0000049	translation;;ribosome;;structural constituent of ribosome;;rRNA binding;;tRNA binding	K02878	large subunit ribosomal protein L16	-	-
gene0153	rpmC	MULTISPECIES: 50S ribosomal protein L29	RP01	Chromosome	Chromosome	+	143215	143415	201	MULTISPECIES: 50S ribosomal protein L29	RecName: Full=50S ribosomal protein L29 [Bacillus licheniformis DSM 13 = ATCC 14580]	PF00831	Ribosomal_L29	Ribosomal L29 protein	COG0255	Ribosomal protein L29	GO:0006412;GO:0005840;GO:0022625;GO:0003735	translation;;ribosome;;cytosolic large ribosomal subunit;;structural constituent of ribosome	K02904	large subunit ribosomal protein L29	-	-
gene0154	rpsQ	MULTISPECIES: 30S ribosomal protein S17	RP01	Chromosome	Chromosome	+	143440	143703	264	MULTISPECIES: 30S ribosomal protein S17	RecName: Full=30S ribosomal protein S17 [Bacillus licheniformis DSM 13 = ATCC 14580]	PF00366	Ribosomal_S17	Ribosomal protein S17	COG0186	Ribosomal protein S17	GO:0006412;GO:0005840;GO:0022627;GO:0003735;GO:0019843	translation;;ribosome;;cytosolic small ribosomal subunit;;structural constituent of ribosome;;rRNA binding	K02961	small subunit ribosomal protein S17	-	-
gene0155	rplN	MULTISPECIES: 50S ribosomal protein L14	RP01	Chromosome	Chromosome	+	143744	144112	369	MULTISPECIES: 50S ribosomal protein L14	RecName: Full=50S ribosomal protein L14 [Bacillus licheniformis DSM 13 = ATCC 14580]	PF00238	Ribosomal_L14	Ribosomal protein L14p/L23e	COG0093	Ribosomal protein L14	GO:0006412;GO:0015934;GO:0003735;GO:0019843	translation;;large ribosomal subunit;;structural constituent of ribosome;;rRNA binding	K02874	large subunit ribosomal protein L14	-	-
gene0156	rplX	MULTISPECIES: 50S ribosomal protein L24	RP01	Chromosome	Chromosome	+	144148	144459	312	MULTISPECIES: 50S ribosomal protein L24	RecName: Full=50S ribosomal protein L24 [Bacillus licheniformis DSM 13 = ATCC 14580]	PF17136;PF00467	ribosomal_L24;KOW	Ribosomal proteins 50S L24/mitochondrial 39S L24;KOW motif	COG0198	Ribosomal protein L24	GO:0006412;GO:0005840;GO:0003735;GO:0019843	translation;;ribosome;;structural constituent of ribosome;;rRNA binding	K02895	large subunit ribosomal protein L24	-	-
gene0157	rplE	MULTISPECIES: 50S ribosomal protein L5	RP01	Chromosome	Chromosome	+	144485	145024	540	MULTISPECIES: 50S ribosomal protein L5	RecName: Full=50S ribosomal protein L5 [Bacillus licheniformis DSM 13 = ATCC 14580]	PF00673;PF00281	Ribosomal_L5_C;Ribosomal_L5	ribosomal L5P family C-terminus;Ribosomal protein L5	COG0094	Ribosomal protein L5	GO:0006412;GO:0005840;GO:0003735;GO:0019843;GO:0000049	translation;;ribosome;;structural constituent of ribosome;;rRNA binding;;tRNA binding	K02931	large subunit ribosomal protein L5	-	-
gene0158	rpsN	MULTISPECIES: 30S ribosomal protein S14	RP01	Chromosome	Chromosome	+	145047	145232	186	MULTISPECIES: 30S ribosomal protein S14	RecName: Full=30S ribosomal protein S14 type Z 1 [Bacillus licheniformis DSM 13 = ATCC 14580]	PF00253	Ribosomal_S14	Ribosomal protein S14p/S29e	COG0199	Ribosomal protein S14	GO:0006412;GO:0005840;GO:0015935;GO:0003735;GO:0008270;GO:0019843	translation;;ribosome;;small ribosomal subunit;;structural constituent of ribosome;;zinc ion binding;;rRNA binding	K02954	small subunit ribosomal protein S14	-	-
gene0159	rpsH	MULTISPECIES: 30S ribosomal protein S8	RP01	Chromosome	Chromosome	+	145264	145662	399	MULTISPECIES: 30S ribosomal protein S8	RecName: Full=30S ribosomal protein S8 [Bacillus licheniformis DSM 13 = ATCC 14580]	PF00410	Ribosomal_S8	Ribosomal protein S8	COG0096	Ribosomal protein S8	GO:0006412;GO:0005840;GO:0003735;GO:0019843	translation;;ribosome;;structural constituent of ribosome;;rRNA binding	K02994	small subunit ribosomal protein S8	-	-
gene0160	rplF	MULTISPECIES: 50S ribosomal protein L6	RP01	Chromosome	Chromosome	+	145692	146228	537	MULTISPECIES: 50S ribosomal protein L6	RecName: Full=50S ribosomal protein L6 [Bacillus licheniformis DSM 13 = ATCC 14580]	PF00347;PF00347	Ribosomal_L6;Ribosomal_L6	Ribosomal protein L6;Ribosomal protein L6	COG0097	Ribosomal protein L6P/L9E	GO:0006412;GO:0005840;GO:0003735;GO:0019843	translation;;ribosome;;structural constituent of ribosome;;rRNA binding	K02933	large subunit ribosomal protein L6	-	-
gene0161	rplR	MULTISPECIES: 50S ribosomal protein L18	RP01	Chromosome	Chromosome	+	146260	146622	363	MULTISPECIES: 50S ribosomal protein L18	RecName: Full=50S ribosomal protein L18 [Bacillus licheniformis DSM 13 = ATCC 14580]	PF00861	Ribosomal_L18p	Ribosomal L18 of archaea, bacteria, mitoch. and chloroplast	COG0256	Ribosomal protein L18	GO:0006412;GO:0005840;GO:0003735;GO:0019843	translation;;ribosome;;structural constituent of ribosome;;rRNA binding	K02881	large subunit ribosomal protein L18	-	-
gene0162	rpsE	ribosomal protein S5	RP01	Chromosome	Chromosome	+	146641	147147	507	ribosomal protein S5	RecName: Full=30S ribosomal protein S5 [Bacillus licheniformis DSM 13 = ATCC 14580]	PF00333;PF03719	Ribosomal_S5;Ribosomal_S5_C	Ribosomal protein S5, N-terminal domain;Ribosomal protein S5, C-terminal domain	COG0098	Ribosomal protein S5	GO:0006412;GO:0015935;GO:0003735;GO:0019843	translation;;small ribosomal subunit;;structural constituent of ribosome;;rRNA binding	K02988	small subunit ribosomal protein S5	-	-
gene0163	rpmD	MULTISPECIES: 50S ribosomal protein L30	RP01	Chromosome	Chromosome	+	147161	147340	180	MULTISPECIES: 50S ribosomal protein L30	RecName: Full=50S ribosomal protein L30 [Bacillus licheniformis DSM 13 = ATCC 14580]	PF00327	Ribosomal_L30	Ribosomal protein L30p/L7e	COG1841	Ribosomal protein L30/L7E	GO:0006412;GO:0015934;GO:0003735	translation;;large ribosomal subunit;;structural constituent of ribosome	K02907	large subunit ribosomal protein L30	-	-
gene0164	rplO	MULTISPECIES: 50S ribosomal protein L15	RP01	Chromosome	Chromosome	+	147371	147811	441	MULTISPECIES: 50S ribosomal protein L15	RecName: Full=50S ribosomal protein L15 [Bacillus licheniformis DSM 13 = ATCC 14580]	PF00828	Ribosomal_L27A	Ribosomal proteins 50S-L15, 50S-L18e, 60S-L27A	COG0200	Ribosomal protein L15	GO:0006412;GO:0015934;GO:0003735;GO:0019843	translation;;large ribosomal subunit;;structural constituent of ribosome;;rRNA binding	K02876	large subunit ribosomal protein L15	-	-
gene0165	secY	MULTISPECIES: preprotein translocase subunit SecY	RP01	Chromosome	Chromosome	+	147813	149108	1296	MULTISPECIES: preprotein translocase subunit SecY	RecName: Full=Protein translocase subunit SecY [Bacillus licheniformis DSM 13 = ATCC 14580]	PF00344	SecY	SecY	COG0201	Preprotein translocase subunit SecY	GO:0006605;GO:0065002;GO:0043952;GO:0016021;GO:0005886	protein targeting;;intracellular protein transmembrane transport;;protein transport by the Sec complex;;integral component of membrane;;plasma membrane	K03076	preprotein translocase subunit SecY	-	-
gene0166	adk	MULTISPECIES: adenylate kinase	RP01	Chromosome	Chromosome	+	149162	149815	654	MULTISPECIES: adenylate kinase	RecName: Full=Adenylate kinase; Short=AK; AltName: Full=ATP-AMP transphosphorylase; AltName: Full=ATP:AMP phosphotransferase; AltName: Full=Adenylate monophosphate kinase [Bacillus licheniformis DSM 13 = ATCC 14580]	PF00406;PF13207;PF05191	ADK;AAA_17;ADK_lid	Adenylate kinase;AAA domain;Adenylate kinase, active site lid	COG0563	Adenylate kinase or related kinase	GO:0044209;GO:0005737;GO:0005524;GO:0008270;GO:0004017	AMP salvage;;cytoplasm;;ATP binding;;zinc ion binding;;adenylate kinase activity	K00939	adenylate kinase [EC:2.7.4.3]	2.7.4.3	Transferases; Transferring phosphorus-containing groups; Phosphotransferases with a phosphate group as acceptor; ATP:AMP phosphotransferase
gene0167	map	MULTISPECIES: type I methionyl aminopeptidase	RP01	Chromosome	Chromosome	+	149812	150558	747	MULTISPECIES: type I methionyl aminopeptidase	RecName: Full=Methionine aminopeptidase 1; Short=MAP 1; Short=MetAP 1; AltName: Full=Peptidase M [Bacillus subtilis subsp. subtilis str. 168]	PF00557	Peptidase_M24	Metallopeptidase family M24	COG0024	Methionine aminopeptidase	GO:0070084;GO:0046872;GO:0070006	protein initiator methionine removal;;metal ion binding;;metalloaminopeptidase activity	K01265	methionyl aminopeptidase [EC:3.4.11.18]	3.4.11.18	Hydrolases; Acting on peptide bonds (peptidases); Aminopeptidases; methionyl aminopeptidase
gene0168	-	hypothetical protein	RP01	Chromosome	Chromosome	+	150626	150898	273	hypothetical protein	RecName: Full=Putative ribosome-binding protein YbzG [Bacillus subtilis subsp. subtilis str. 168]	-	-	-	COG2163	Ribosomal protein L14E/L6E/L27E	-	-	-	-	-	-
gene0169	infA	MULTISPECIES: translation initiation factor IF-1	RP01	Chromosome	Chromosome	+	150876	151094	219	MULTISPECIES: translation initiation factor IF-1	RecName: Full=Translation initiation factor IF-1 [Bacillus licheniformis DSM 13 = ATCC 14580]	PF01176	eIF-1a	Translation initiation factor 1A / IF-1	COG0361	Translation initiation factor IF-1	GO:0005737;GO:0005829;GO:0019843;GO:0043022;GO:0003743	cytoplasm;;cytosol;;rRNA binding;;ribosome binding;;translation initiation factor activity	K02518	translation initiation factor IF-1	-	-
gene0170	rpmJ	MULTISPECIES: 50S ribosomal protein L36	RP01	Chromosome	Chromosome	+	151128	151241	114	MULTISPECIES: 50S ribosomal protein L36	RecName: Full=50S ribosomal protein L36 [Clostridium novyi NT] >lcl|A5I7I1.1 RecName: Full=50S ribosomal protein L36 [Clostridium botulinum A str. Hall] >lcl|A6LPT6.1 RecName: Full=50S ribosomal protein L36 [Clostridium beijerinckii NCIMB 8052] >lcl|A7FZ48.1 RecName: Full=50S ribosomal protein L36 [Clostridium botulinum A str. ATCC 19397] >lcl|A7GJ49.1 RecName: Full=50S ribosomal protein L36 [Clo…	PF00444	Ribosomal_L36	Ribosomal protein L36	COG0257	Ribosomal protein L36	GO:0006412;GO:0005840;GO:0003735	translation;;ribosome;;structural constituent of ribosome	K02919	large subunit ribosomal protein L36	-	-
gene0171	rpsM	MULTISPECIES: 30S ribosomal protein S13	RP01	Chromosome	Chromosome	+	151264	151629	366	MULTISPECIES: 30S ribosomal protein S13	RecName: Full=30S ribosomal protein S13 [Bacillus licheniformis DSM 13 = ATCC 14580]	PF00416	Ribosomal_S13	Ribosomal protein S13/S18	COG0099	Ribosomal protein S13	GO:0006412;GO:0005840;GO:0003735;GO:0019843;GO:0000049	translation;;ribosome;;structural constituent of ribosome;;rRNA binding;;tRNA binding	K02952	small subunit ribosomal protein S13	-	-
gene0172	rpsK	MULTISPECIES: 30S ribosomal protein S11	RP01	Chromosome	Chromosome	+	151650	152045	396	MULTISPECIES: 30S ribosomal protein S11	RecName: Full=30S ribosomal protein S11 [Bacillus licheniformis DSM 13 = ATCC 14580]	PF00411	Ribosomal_S11	Ribosomal protein S11	COG0100	Ribosomal protein S11	GO:0006412;GO:0005840;GO:0003735;GO:0019843	translation;;ribosome;;structural constituent of ribosome;;rRNA binding	K02948	small subunit ribosomal protein S11	-	-
gene0173	rpoA	MULTISPECIES: DNA-directed RNA polymerase subunit alpha	RP01	Chromosome	Chromosome	+	152220	153164	945	MULTISPECIES: DNA-directed RNA polymerase subunit alpha	RecName: Full=DNA-directed RNA polymerase subunit alpha; Short=RNAP subunit alpha; AltName: Full=RNA polymerase subunit alpha; AltName: Full=Transcriptase subunit alpha [Bacillus licheniformis DSM 13 = ATCC 14580]	PF03118;PF01000;PF01193	RNA_pol_A_CTD;RNA_pol_A_bac;RNA_pol_L	Bacterial RNA polymerase, alpha chain C terminal domain;RNA polymerase Rpb3/RpoA insert domain;RNA polymerase Rpb3/Rpb11 dimerisation domain	COG0202	DNA-directed RNA polymerase, alpha subunit/40 kD subunit	GO:0006351;GO:0003677;GO:0046983;GO:0003899	transcription, DNA-templated;;DNA binding;;protein dimerization activity;;DNA-directed 5'-3' RNA polymerase activity	K03040	DNA-directed RNA polymerase subunit alpha [EC:2.7.7.6]	2.7.7.6	Transferases; Transferring phosphorus-containing groups; Nucleotidyltransferases; nucleoside-triphosphate:RNA nucleotidyltransferase (DNA-directed)
gene0174	rplQ	MULTISPECIES: 50S ribosomal protein L17	RP01	Chromosome	Chromosome	+	153242	153604	363	MULTISPECIES: 50S ribosomal protein L17	RecName: Full=50S ribosomal protein L17 [Bacillus licheniformis DSM 13 = ATCC 14580]	PF01196	Ribosomal_L17	Ribosomal protein L17	COG0203	Ribosomal protein L17	GO:0006412;GO:0005840;GO:0003735	translation;;ribosome;;structural constituent of ribosome	K02879	large subunit ribosomal protein L17	-	-
gene0175	ecfA1	MULTISPECIES: energy-coupling factor ABC transporter ATP-binding protein	RP01	Chromosome	Chromosome	+	153746	154591	846	MULTISPECIES: energy-coupling factor ABC transporter ATP-binding protein	RecName: Full=Energy-coupling factor transporter ATP-binding protein EcfA1; Short=ECF transporter A component EcfA1 [Bacillus licheniformis DSM 13 = ATCC 14580]	PF00005	ABC_tran	ABC transporter	COG1122	Energy-coupling factor transporter ATP-binding protein EcfA2	GO:0005886;GO:0005524;GO:0042626	plasma membrane;;ATP binding;;ATPase-coupled transmembrane transporter activity	K16786	energy-coupling factor transport system ATP-binding protein [EC:7.-.-.-]	-	-
gene0176	ecfA2	MULTISPECIES: energy-coupling factor ABC transporter ATP-binding protein	RP01	Chromosome	Chromosome	+	154567	155436	870	MULTISPECIES: energy-coupling factor ABC transporter ATP-binding protein	RecName: Full=Energy-coupling factor transporter ATP-binding protein EcfA2; Short=ECF transporter A component EcfA2 [Bacillus licheniformis DSM 13 = ATCC 14580]	PF00005;PF13304	ABC_tran;AAA_21	ABC transporter;AAA domain, putative AbiEii toxin, Type IV TA system	COG1122	Energy-coupling factor transporter ATP-binding protein EcfA2	GO:0005886;GO:0005524;GO:0042626	plasma membrane;;ATP binding;;ATPase-coupled transmembrane transporter activity	K16787	energy-coupling factor transport system ATP-binding protein [EC:7.-.-.-]	-	-
gene0177	ecfT	MULTISPECIES: energy-coupling factor transporter transmembrane protein EcfT	RP01	Chromosome	Chromosome	+	155433	156230	798	MULTISPECIES: energy-coupling factor transporter transmembrane protein EcfT	RecName: Full=Energy-coupling factor transporter transmembrane protein EcfT; Short=ECF transporter T component EcfT [Bacillus subtilis subsp. subtilis str. 168]	PF02361	CbiQ	Cobalt transport protein	COG0619	ECF-type transporter transmembrane protein EcfT	GO:0016021;GO:0005886;GO:0022857	integral component of membrane;;plasma membrane;;transmembrane transporter activity	K16785	energy-coupling factor transport system permease protein	-	-
gene0178	truA	MULTISPECIES: tRNA pseudouridine(38-40) synthase TruA	RP01	Chromosome	Chromosome	+	156241	156984	744	MULTISPECIES: tRNA pseudouridine(38-40) synthase TruA	RecName: Full=tRNA pseudouridine synthase A; AltName: Full=tRNA pseudouridine(38-40) synthase; AltName: Full=tRNA pseudouridylate synthase I; AltName: Full=tRNA-uridine isomerase I [Bacillus licheniformis DSM 13 = ATCC 14580]	PF01416;PF01416	PseudoU_synth_1;PseudoU_synth_1	tRNA pseudouridine synthase;tRNA pseudouridine synthase	COG0101	tRNA U38,U39,U40 pseudouridine synthase TruA	GO:0031119;GO:0003723;GO:0106029	tRNA pseudouridine synthesis;;RNA binding;;tRNA pseudouridine synthase activity	K06173	tRNA pseudouridine38-40 synthase [EC:5.4.99.12]	5.4.99.12	Isomerases; Intramolecular transferases; Transferring other groups; tRNA-uridine38-40 uracil mutase
gene0179	rplM	MULTISPECIES: 50S ribosomal protein L13	RP01	Chromosome	Chromosome	+	157146	157583	438	MULTISPECIES: 50S ribosomal protein L13	RecName: Full=50S ribosomal protein L13 [Bacillus licheniformis DSM 13 = ATCC 14580]	PF00572	Ribosomal_L13	Ribosomal protein L13	COG0102	Ribosomal protein L13	GO:0006412;GO:0005840;GO:0003735	translation;;ribosome;;structural constituent of ribosome	K02871	large subunit ribosomal protein L13	-	-
gene0180	rpsI	MULTISPECIES: 30S ribosomal protein S9	RP01	Chromosome	Chromosome	+	157604	157996	393	MULTISPECIES: 30S ribosomal protein S9	RecName: Full=30S ribosomal protein S9 [Bacillus licheniformis DSM 13 = ATCC 14580]	PF00380	Ribosomal_S9	Ribosomal protein S9/S16	COG0103	Ribosomal protein S9	GO:0006412;GO:0005840;GO:0003735	translation;;ribosome;;structural constituent of ribosome	K02996	small subunit ribosomal protein S9	-	-
gene0181	-	phage integrase family protein	RP01	Chromosome	Chromosome	-	158830	158411	420	phage integrase family protein	RecName: Full=ICEBs1 integrase [Bacillus subtilis subsp. subtilis str. 168]	PF00589	Phage_integrase	Phage integrase family	COG4974	Site-specific recombinase XerD	GO:0006310;GO:0015074;GO:0003677	DNA recombination;;DNA integration;;DNA binding	-	-	-	-
gene0182	-	MULTISPECIES: glycosyl hydrolase lipoprotein	RP01	Chromosome	Chromosome	-	159457	158834	624	MULTISPECIES: glycosyl hydrolase lipoprotein	RecName: Full=SPbeta prophage-derived uncharacterized lipoprotein YonS; Flags: Precursor [Bacillus subtilis subsp. subtilis str. 168]	-	-	-	-	-	-	-	-	-	-	-
gene0183	-	hypothetical protein	RP01	Chromosome	Chromosome	+	160209	160307	99	hypothetical protein	-	-	-	-	-	-	-	-	-	-	-	-
gene0184	-	hypothetical protein	RP01	Chromosome	Chromosome	+	160683	160835	153	hypothetical protein	-	PF05105	Phage_holin_4_1	Bacteriophage holin family	COG4824	Phage-related holin (Lysis protein)	-	-	-	-	-	-
gene0185	-	MULTISPECIES: DinB family protein	RP01	Chromosome	Chromosome	-	161491	161033	459	MULTISPECIES: DinB family protein	RecName: Full=Uncharacterized protein YizA [Bacillus subtilis subsp. subtilis str. 168]	PF05163;PF12867;PF04978	DinB;DinB_2;DUF664	DinB family;DinB superfamily;Protein of unknown function (DUF664)	COG2318	Bacillithiol/mycothiol S-transferase BstA/DinB, DinB/YfiT family (unrelated to E. coli DinB)	-	-	-	-	-	-
gene0186	nisP	intracellular serine protease LanP	RP01	Chromosome	Chromosome	-	163435	162032	1404	intracellular serine protease LanP	RecName: Full=Epidermin leader peptide-processing serine protease EpiP; Flags: Precursor [Staphylococcus epidermidis]	PF00082	Peptidase_S8	Subtilase family	COG1404	Serine protease, subtilisin family	-	-	K20486	lantibiotic leader peptide-processing serine protease [EC:3.4.21.-]	-	-
gene0187	nukG	MULTISPECIES: ABC transporter permease	RP01	Chromosome	Chromosome	-	164273	163515	759	MULTISPECIES: ABC transporter permease	-	PF12730	ABC2_membrane_4	ABC-2 family transporter protein	COG4200	Predicted lantabiotic-exporting membrane pepmease, EfiE/EfiG/ABC2 family	GO:0016021	integral component of membrane	K20461	lantibiotic transport system permease protein	-	-
gene0188	nukE	MULTISPECIES: hypothetical protein	RP01	Chromosome	Chromosome	-	164973	164275	699	MULTISPECIES: hypothetical protein	-	-	-	-	COG4200	Predicted lantabiotic-exporting membrane pepmease, EfiE/EfiG/ABC2 family	GO:0016021	integral component of membrane	K20460	lantibiotic transport system permease protein	-	-
gene0189	nukF	MULTISPECIES: ABC transporter ATP-binding protein	RP01	Chromosome	Chromosome	-	165875	164970	906	MULTISPECIES: ABC transporter ATP-binding protein	RecName: Full=Uncharacterized ABC transporter ATP-binding protein YcbN [Bacillus subtilis subsp. subtilis str. 168]	PF00005;PF13304	ABC_tran;AAA_21	ABC transporter;AAA domain, putative AbiEii toxin, Type IV TA system	COG1131	ABC-type multidrug transport system, ATPase component	GO:0005524;GO:0042626	ATP binding;;ATPase-coupled transmembrane transporter activity	K20459	lantibiotic transport system ATP-binding protein	-	-
gene0190	-	MULTISPECIES: helix-turn-helix transcriptional regulator	RP01	Chromosome	Chromosome	-	166133	165900	234	MULTISPECIES: helix-turn-helix transcriptional regulator	RecName: Full=Uncharacterized HTH-type transcriptional regulator MJ0272 [Methanocaldococcus jannaschii DSM 2661]	PF01381;PF13443;PF12844;PF13560	HTH_3;HTH_26;HTH_19;HTH_31	Helix-turn-helix;Cro/C1-type HTH DNA-binding domain;Helix-turn-helix domain;Helix-turn-helix domain	COG1476	DNA-binding transcriptional regulator, XRE-family HTH domain	-	-	K07729	putative transcriptional regulator	-	-
gene0191	nukG	MULTISPECIES: ABC transporter permease	RP01	Chromosome	Chromosome	-	166897	166157	741	MULTISPECIES: ABC transporter permease	-	PF12730;PF12679	ABC2_membrane_4;ABC2_membrane_2	ABC-2 family transporter protein;ABC-2 family transporter protein	COG4200	Predicted lantabiotic-exporting membrane pepmease, EfiE/EfiG/ABC2 family	GO:0016021	integral component of membrane	K20461	lantibiotic transport system permease protein	-	-
gene0192	nukE	MULTISPECIES: ABC transporter permease	RP01	Chromosome	Chromosome	-	167606	166899	708	MULTISPECIES: ABC transporter permease	-	PF12730;PF13346	ABC2_membrane_4;ABC2_membrane_5	ABC-2 family transporter protein;ABC-2 family transporter protein	COG4200	Predicted lantabiotic-exporting membrane pepmease, EfiE/EfiG/ABC2 family	GO:0016021	integral component of membrane	K20460	lantibiotic transport system permease protein	-	-
gene0193	nukF	MULTISPECIES: ABC transporter ATP-binding protein	RP01	Chromosome	Chromosome	-	168523	167603	921	MULTISPECIES: ABC transporter ATP-binding protein	RecName: Full=Bacitracin transport ATP-binding protein BcrA [Bacillus licheniformis]	PF00005;PF13304	ABC_tran;AAA_21	ABC transporter;AAA domain, putative AbiEii toxin, Type IV TA system	COG1131	ABC-type multidrug transport system, ATPase component	GO:0005524;GO:0042626	ATP binding;;ATPase-coupled transmembrane transporter activity	K20459	lantibiotic transport system ATP-binding protein	-	-
gene0194	-	MULTISPECIES: hypothetical protein	RP01	Chromosome	Chromosome	-	168878	168576	303	MULTISPECIES: hypothetical protein	-	-	-	-	-	-	GO:0016021	integral component of membrane	-	-	-	-
gene0195	-	MULTISPECIES: peptidase domain-containing ABC transporter	RP01	Chromosome	Chromosome	-	171147	168997	2151	MULTISPECIES: peptidase domain-containing ABC transporter	RecName: Full=Cyclolysin secretion/processing ATP-binding protein CyaB [Bordetella pertussis 18323]	PF03412;PF00005;PF00664	Peptidase_C39;ABC_tran;ABC_membrane	Peptidase C39 family;ABC transporter;ABC transporter transmembrane region	COG2274	ABC-type bacteriocin/lantibiotic exporters, contain an N-terminal double-glycine peptidase domain	GO:0016021;GO:0005524;GO:0042626;GO:0008234	integral component of membrane;;ATP binding;;ATPase-coupled transmembrane transporter activity;;cysteine-type peptidase activity	-	-	-	-
gene0196	-	MULTISPECIES: type 2 lantipeptide synthetase LanM family protein	RP01	Chromosome	Chromosome	-	174233	171141	3093	MULTISPECIES: type 2 lantipeptide synthetase LanM family protein	RecName: Full=Lacticin 481/lactococcin biosynthesis protein LcnDR2 [Lactococcus lactis subsp. lactis]	PF13575;PF05147	DUF4135;LANC_like	Domain of unknown function (DUF4135);Lanthionine synthetase C-like protein	COG4403	Lantibiotic modifying enzyme	-	-	-	-	-	-
gene0197	-	lichenicidin prepeptide LanA-like protein	RP01	Chromosome	Chromosome	-	174632	174417	216	lichenicidin prepeptide LanA-like protein	RecName: Full=Lantibiotic lichenicidin VK21 A2; Short=LchA2; Flags: Precursor [Bacillus licheniformis]	-	-	-	-	-	-	-	-	-	-	-
gene0198	-	type 2 lantipeptide synthetase LanM family protein	RP01	Chromosome	Chromosome	-	177748	174638	3111	type 2 lantipeptide synthetase LanM family protein	RecName: Full=Lacticin 481/lactococcin biosynthesis protein LcnDR2 [Lactococcus lactis subsp. lactis]	PF13575;PF05147	DUF4135;LANC_like	Domain of unknown function (DUF4135);Lanthionine synthetase C-like protein	COG4403	Lantibiotic modifying enzyme	-	-	-	-	-	-
gene0199	-	MULTISPECIES: plantaricin C family lantibiotic	RP01	Chromosome	Chromosome	-	178267	178061	207	MULTISPECIES: plantaricin C family lantibiotic	RecName: Full=Lantibiotic lichenicidin VK21 A1; Short=LchA1; Flags: Precursor [Bacillus licheniformis] >lcl|Q65DC4.1 RecName: Full=Lantibiotic lichenicidin A1; Short=LchA1; AltName: Full=BliA1; Flags: Precursor [Bacillus licheniformis DSM 13 = ATCC 14580]	PF14867	Lantibiotic_a	Lantibiotic alpha	-	-	GO:0050830	defense response to Gram-positive bacterium	-	-	-	-
gene0200	-	GHKL domain-containing protein	RP01	Chromosome	Chromosome	+	178494	179783	1290	GHKL domain-containing protein	RecName: Full=Probable C4-dicarboxylate sensor kinase [Alkalihalobacillus halodurans C-125]	PF14501;PF02518	HATPase_c_5;HATPase_c	GHKL domain;Histidine kinase-, DNA gyrase B-, and HSP90-like ATPase	COG3290	Sensor histidine kinase DipB regulating citrate/malate metabolism	-	-	-	-	-	-
gene0201	agrB	MULTISPECIES: accessory gene regulator B family protein	RP01	Chromosome	Chromosome	+	179776	180390	615	MULTISPECIES: accessory gene regulator B family protein	-	PF04647	AgrB	Accessory gene regulator B	-	-	GO:0009405;GO:0009372;GO:0016021;GO:0005886;GO:0008233	obsolete pathogenesis;;quorum sensing;;integral component of membrane;;plasma membrane;;peptidase activity	K07813	accessory gene regulator B	-	-
gene0202	agrD	MULTISPECIES: cyclic lactone autoinducer peptide	RP01	Chromosome	Chromosome	+	180406	180537	132	MULTISPECIES: cyclic lactone autoinducer peptide	-	-	-	-	-	-	-	-	K07800	AgrD protein	-	-
gene0203	-	MULTISPECIES: LytTR family DNA-binding domain-containing protein	RP01	Chromosome	Chromosome	+	180534	181259	726	MULTISPECIES: LytTR family DNA-binding domain-containing protein	RecName: Full=Sensory transduction protein LytT [Bacillus subtilis subsp. subtilis str. 168]	PF04397;PF00072	LytTR;Response_reg	LytTr DNA-binding domain;Response regulator receiver domain	COG3279	DNA-binding response regulator, LytR/AlgR family	GO:0000160;GO:0005737;GO:0003677	phosphorelay signal transduction system;;cytoplasm;;DNA binding	-	-	-	-
gene0204	-	MULTISPECIES: YbaK family protein	RP01	Chromosome	Chromosome	+	181541	181984	444	MULTISPECIES: YbaK family protein	RecName: Full=Uncharacterized protein YbaK [Bacillus subtilis subsp. subtilis str. 168]	PF10730	DUF2521	Protein of unknown function (DUF2521)	COG5870	Uncharacterized sporulation protein YbaK, contains DUF2521 domain (not related to E. coli deacylase YbaK, COG2606)	-	-	-	-	-	-
gene0205	amiABC	MULTISPECIES: N-acetylmuramoyl-L-alanine amidase CwlD	RP01	Chromosome	Chromosome	+	182069	182782	714	MULTISPECIES: N-acetylmuramoyl-L-alanine amidase CwlD	RecName: Full=Germination-specific N-acetylmuramoyl-L-alanine amidase; AltName: Full=Autolysin; AltName: Full=Cell wall hydrolase; Flags: Precursor [Bacillus subtilis subsp. subtilis str. 168]	PF01520	Amidase_3	N-acetylmuramoyl-L-alanine amidase	COG0860	N-acetylmuramoyl-L-alanine amidase	GO:0009253;GO:0008745	peptidoglycan catabolic process;;N-acetylmuramoyl-L-alanine amidase activity	K01448	N-acetylmuramoyl-L-alanine amidase [EC:3.5.1.28]	3.5.1.28	Hydrolases; Acting on carbon-nitrogen bonds, other than peptide bonds; In linear amides; peptidoglycan amidohydrolase
gene0206	mrp	ATP-binding protein Mrp	RP01	Chromosome	Chromosome	+	182823	183929	1107	ATP-binding protein Mrp	RecName: Full=Iron-sulfur cluster carrier protein [Bacillus subtilis subsp. subtilis str. 168]	PF10609;PF01656;PF13614;PF09140;PF02374	ParA;CbiA;AAA_31;MipZ;ArsA_ATPase	NUBPL iron-transfer P-loop NTPase;CobQ/CobB/MinD/ParA nucleotide binding domain;AAA domain;ATPase MipZ;Anion-transporting ATPase	COG0489	Fe-S cluster carrier ATPase, Mrp/ApbC/NBP35 family	-	-	K03593	ATP-binding protein involved in chromosome partitioning	-	-
gene0207	gerD	spore gernimation protein GerD	RP01	Chromosome	Chromosome	-	184564	183983	582	spore gernimation protein GerD	RecName: Full=Spore germination protein GerD; Flags: Precursor [Bacillus subtilis subsp. subtilis str. 168]	PF17898	GerD	Spore germination GerD central core domain	COG5904	Spore germination receptor GerD	-	-	K06294	spore germination protein D	-	-
gene0208	kbaA	MULTISPECIES: KinB-signaling pathway activation protein	RP01	Chromosome	Chromosome	+	184678	185277	600	MULTISPECIES: KinB-signaling pathway activation protein	RecName: Full=KinB-signaling pathway activation protein [Bacillus subtilis subsp. subtilis str. 168]	PF14089	KbaA	KinB-signalling pathway activation in sporulation	COG5810	Sporulation protein KbaA, activator of histidine kinase KinB	GO:0030435;GO:0045881;GO:0016021;GO:0005886	sporulation resulting in formation of a cellular spore;;positive regulation of sporulation resulting in formation of a cellular spore;;integral component of membrane;;plasma membrane	K06349	KinB signaling pathway activation protein	-	-
gene0209	-	MULTISPECIES: polysaccharide deacetylase family sporulation protein PdaB	RP01	Chromosome	Chromosome	-	186050	185286	765	MULTISPECIES: polysaccharide deacetylase family sporulation protein PdaB	RecName: Full=Probable polysaccharide deacetylase PdaB; Flags: Precursor [Bacillus subtilis subsp. subtilis str. 168]	PF01522	Polysacc_deac_1	Polysaccharide deacetylase	COG0726	Peptidoglycan/xylan/chitin deacetylase, PgdA/NodB/CDA1 family	-	-	-	-	-	-
gene0215	-	putative membrane protein	RP01	Chromosome	Chromosome	-	191838	191665	174	putative membrane protein	-	-	-	-	-	-	-	-	-	-	-	-
gene0216	fmtA	MULTISPECIES: serine hydrolase	RP01	Chromosome	Chromosome	-	193147	191978	1170	MULTISPECIES: serine hydrolase	RecName: Full=Putative penicillin-binding protein PbpX [Bacillus subtilis subsp. subtilis str. 168]	PF00144	Beta-lactamase	Beta-lactamase	COG1680	CubicO group peptidase, beta-lactamase class C family	GO:0016021	integral component of membrane	K22580	teichoic acid D-alanine hydrolase [EC:3.1.1.103]	3.1.1.103	Hydrolases; Acting on ester bonds; Carboxylic-ester hydrolases; teichoic acid D-alanylhydrolase
gene0217	-	MULTISPECIES: hypothetical protein	RP01	Chromosome	Chromosome	+	193323	193544	222	MULTISPECIES: hypothetical protein	-	-	-	-	-	-	-	-	-	-	-	-
gene0218	-	hypothetical protein	RP01	Chromosome	Chromosome	+	193660	194637	978	hypothetical protein	RecName: Full=Uncharacterized protein YbaS [Bacillus subtilis subsp. subtilis str. 168]	PF01758	SBF	Sodium Bile acid symporter family	COG0385	Predicted Na+-dependent transporter YfeH	-	-	K03453	bile acid:Na+ symporter, BASS family	-	-
gene0219	-	MULTISPECIES: DUF5391 family protein	RP01	Chromosome	Chromosome	+	194672	195085	414	MULTISPECIES: DUF5391 family protein	RecName: Full=Uncharacterized protein YxaJ [Bacillus subtilis subsp. subtilis str. 168]	PF17369	DUF5391	Family of unknown function (DUF5391)	-	-	GO:0016021	integral component of membrane	-	-	-	-
gene0220	phzF	MULTISPECIES: PhzF family phenazine biosynthesis protein	RP01	Chromosome	Chromosome	-	195984	195115	870	MULTISPECIES: PhzF family phenazine biosynthesis protein	RecName: Full=Uncharacterized isomerase PM1503 [Pasteurella multocida subsp. multocida str. Pm70]	PF02567	PhzC-PhzF	Phenazine biosynthesis-like protein	COG0384	Predicted epimerase YddE/YHI9, PhzF superfamily	GO:0009058;GO:0003824	biosynthetic process;;catalytic activity	K06998	trans-2,3-dihydro-3-hydroxyanthranilate isomerase [EC:5.3.3.17]	5.3.3.17	Isomerases; Intramolecular oxidoreductases; Transposing C=C bonds; (5S,6S)-6-amino-5-hydroxycyclohexa-1,3-diene-1-carboxyate isomerase
gene0221	-	MULTISPECIES: DUF1343 domain-containing protein	RP01	Chromosome	Chromosome	-	197332	196103	1230	MULTISPECIES: DUF1343 domain-containing protein	RecName: Full=Uncharacterized protein YbbC; AltName: Full=ORF2; Flags: Precursor [Bacillus subtilis subsp. subtilis str. 168]	PF07075	DUF1343	Protein of unknown function (DUF1343)	COG3876	Uncharacterized conserved protein YbbC, DUF1343 family	-	-	-	-	-	-
gene0222	nagZ	MULTISPECIES: glycoside hydrolase family 3 protein	RP01	Chromosome	Chromosome	-	199263	197332	1932	MULTISPECIES: glycoside hydrolase family 3 protein	RecName: Full=Beta-hexosaminidase; AltName: Full=Beta-N-acetylhexosaminidase; AltName: Full=N-acetyl-beta-glucosaminidase; AltName: Full=N-acetylglucosaminidase; AltName: Full=ORF1; Flags: Precursor [Bacillus subtilis subsp. subtilis str. 168]	PF00933;PF01915	Glyco_hydro_3;Glyco_hydro_3_C	Glycosyl hydrolase family 3 N terminal domain;Glycosyl hydrolase family 3 C-terminal domain	COG1472	Periplasmic beta-glucosidase and related glycosidases	-	-	K01207	beta-N-acetylhexosaminidase [EC:3.2.1.52]	3.2.1.52	Hydrolases; Glycosylases; Glycosidases, i.e. enzymes that hydrolyse O- and S-glycosyl compounds; beta-N-acetyl-D-hexosaminide N-acetylhexosaminohydrolase
gene0223	pbp4b	MULTISPECIES: penicillin binding protein PBP4B	RP01	Chromosome	Chromosome	-	200627	199278	1350	MULTISPECIES: penicillin binding protein PBP4B	RecName: Full=N-acetylmuramyl-L-alanine amidase; Flags: Precursor [Bacillus subtilis subsp. subtilis str. 168]	PF00144	Beta-lactamase	Beta-lactamase	COG1680	CubicO group peptidase, beta-lactamase class C family	-	-	K21469	serine-type D-Ala-D-Ala carboxypeptidase [EC:3.4.16.4]	3.4.16.4	Hydrolases; Acting on peptide bonds (peptidases); Serine-type carboxypeptidases; serine-type D-Ala-D-Ala carboxypeptidase
gene0224	scrA	MULTISPECIES: PTS transporter subunit EIIC	RP01	Chromosome	Chromosome	-	202061	200694	1368	MULTISPECIES: PTS transporter subunit EIIC	RecName: Full=Putative PTS system EIIBC component YbbF; Includes: RecName: Full=Phosphotransferase enzyme IIB component; AltName: Full=PTS system EIIB component; Includes: RecName: Full=Permease IIC component; AltName: Full=PTS system EIIC component [Bacillus subtilis subsp. subtilis str. 168]	PF02378;PF00367	PTS_EIIC;PTS_EIIB	Phosphotransferase system, EIIC;phosphotransferase system, EIIB	COG1263	Phosphotransferase system IIC components, glucose/maltose/N-acetylglucosamine-specific	-	-	K02810	sucrose PTS system EIIBCA or EIIBC component [EC:2.7.1.211]	2.7.1.211	Transferases; Transferring phosphorus-containing groups; Phosphotransferases with an alcohol group as acceptor; protein-Npi-phospho-L-histidine:sucrose Npi-phosphotransferase
gene0225	-	MULTISPECIES: MurR/RpiR family transcriptional regulator	RP01	Chromosome	Chromosome	-	202935	202078	858	MULTISPECIES: MurR/RpiR family transcriptional regulator	RecName: Full=Uncharacterized HTH-type transcriptional regulator YbbH [Bacillus subtilis subsp. subtilis str. 168]	PF01418;PF01380	HTH_6;SIS	Helix-turn-helix domain, rpiR family;SIS domain	COG1737	DNA-binding transcriptional regulator, MurR/RpiR family, contains HTH and SIS domains	GO:1901135;GO:0003700;GO:0097367	carbohydrate derivative metabolic process;;DNA-binding transcription factor activity;;carbohydrate derivative binding	-	-	-	-
gene0226	murQ	MULTISPECIES: N-acetylmuramic acid 6-phosphate etherase	RP01	Chromosome	Chromosome	-	203871	202954	918	MULTISPECIES: N-acetylmuramic acid 6-phosphate etherase	RecName: Full=N-acetylmuramic acid 6-phosphate etherase 1; Short=MurNAc-6-P etherase 1; AltName: Full=N-acetylmuramic acid 6-phosphate hydrolase 1; AltName: Full=N-acetylmuramic acid 6-phosphate lyase 1 [Bacillus licheniformis DSM 13 = ATCC 14580]	PF01380;PF13580	SIS;SIS_2	SIS domain;SIS domain	COG2103	N-acetylmuramic acid 6-phosphate (MurNAc-6-P) etherase	GO:0005975;GO:0097173;GO:0046348;GO:0097367;GO:0016835	carbohydrate metabolic process;;N-acetylmuramic acid catabolic process;;amino sugar catabolic process;;carbohydrate derivative binding;;carbon-oxygen lyase activity	K07106	N-acetylmuramic acid 6-phosphate etherase [EC:4.2.1.126]	4.2.1.126	Lyases; Carbon-oxygen lyases; Hydro-lyases; (R)-lactate hydro-lyase (adding N-acetyl-D-glucosamine 6-phosphate; N-acetylmuramate 6-phosphate-forming)
gene0227	-	MULTISPECIES: DUF523 domain-containing protein	RP01	Chromosome	Chromosome	-	204498	204046	453	MULTISPECIES: DUF523 domain-containing protein	RecName: Full=Uncharacterized protein YbbK [Bacillus subtilis subsp. subtilis str. 168]	PF04463	2-thiour_desulf	2-thiouracil desulfurase	COG1683	Uncharacterized conserved protein YbbK, DUF523 family	-	-	-	-	-	-
gene0233	rocF	MULTISPECIES: arginase	RP01	Chromosome	Chromosome	+	205365	206279	915	MULTISPECIES: arginase	RecName: Full=Arginase [[Bacillus] caldovelox]	PF00491	Arginase	Arginase family	COG0010	Arginase/agmatinase family enzyme	GO:0006525;GO:0000050;GO:0046872;GO:0004053	arginine metabolic process;;urea cycle;;metal ion binding;;arginase activity	K01476	arginase [EC:3.5.3.1]	3.5.3.1	Hydrolases; Acting on carbon-nitrogen bonds, other than peptide bonds; In linear amidines; L-arginine amidinohydrolase
gene0234	rpoE	MULTISPECIES: RNA polymerase sigma factor SigW	RP01	Chromosome	Chromosome	+	206503	207066	564	MULTISPECIES: RNA polymerase sigma factor SigW	RecName: Full=ECF RNA polymerase sigma factor SigW; Short=ECF sigma factor SigW; AltName: Full=Alternative RNA polymerase sigma factor SigW; AltName: Full=RNA polymerase sigma-W factor; Short=Sigma-W factor [Bacillus subtilis subsp. subtilis str. 168]	PF04542;PF08281;PF04545;PF07638;PF12645	Sigma70_r2;Sigma70_r4_2;Sigma70_r4;Sigma70_ECF;HTH_16	Sigma-70 region 2;Sigma-70, region 4;Sigma-70, region 4;ECF sigma factor;Helix-turn-helix domain	COG1595	DNA-directed RNA polymerase specialized sigma subunit, sigma24 family	GO:0006352;GO:0003677;GO:0016987	DNA-templated transcription, initiation;;DNA binding;;sigma factor activity	K03088	RNA polymerase sigma-70 factor, ECF subfamily	-	-
gene0235	-	anti-sigma-W factor rsiW	RP01	Chromosome	Chromosome	+	207110	207700	591	anti-sigma-W factor rsiW	RecName: Full=Anti-sigma-W factor RsiW [Bacillus licheniformis DSM 13 = ATCC 14580]	PF13490	zf-HC2	Putative zinc-finger	COG5662	Transmembrane transcriptional regulator RsiW (anti-sigma-W factor)	GO:0016021	integral component of membrane	-	-	-	-
gene0236	dacA	MULTISPECIES: diadenylate cyclase CdaA	RP01	Chromosome	Chromosome	+	207866	208687	822	MULTISPECIES: diadenylate cyclase CdaA	RecName: Full=Cyclic di-AMP synthase CdaA; Short=c-di-AMP synthase; AltName: Full=Diadenylate cyclase; Short=DAC [Bacillus subtilis subsp. subtilis str. 168]	PF02457;PF19293	DAC;CdaA_N	DisA bacterial checkpoint controller nucleotide-binding;CdaA N-terminal transmembrane domain	COG1624	c-di-AMP synthetase, contains DisA_N domain	GO:0019932;GO:0006171;GO:0016021;GO:0005886;GO:0005524;GO:0016779;GO:0004016	second-messenger-mediated signaling;;cAMP biosynthetic process;;integral component of membrane;;plasma membrane;;ATP binding;;nucleotidyltransferase activity;;adenylate cyclase activity	K18672	diadenylate cyclase [EC:2.7.7.85]	2.7.7.85	Transferases; Transferring phosphorus-containing groups; Nucleotidyltransferases; ATP:ATP adenylyltransferase (cyclizing)
gene0237	-	MULTISPECIES: YbbR-like domain-containing protein	RP01	Chromosome	Chromosome	+	208680	209996	1317	MULTISPECIES: YbbR-like domain-containing protein	RecName: Full=CdaA regulatory protein CdaR; AltName: Full=YbbR-like domain-containing protein YbbR; AltName: Full=c-di-AMP synthase A regulator [Bacillus subtilis subsp. subtilis str. 168]	PF07949;PF07949;PF07949	YbbR;YbbR;YbbR	YbbR-like protein;YbbR-like protein;YbbR-like protein	COG4856	Cyclic di-AMP synthase regulator CdaR, YbbR domain	-	-	-	-	-	-
gene0238	glmM	Phosphoglucosamine mutase	RP01	Chromosome	Chromosome	+	210017	211363	1347	Phosphoglucosamine mutase	RecName: Full=Phosphoglucosamine mutase [Bacillus licheniformis DSM 13 = ATCC 14580]	PF02878;PF02880;PF00408;PF02879	PGM_PMM_I;PGM_PMM_III;PGM_PMM_IV;PGM_PMM_II	Phosphoglucomutase/phosphomannomutase, alpha/beta/alpha domain I;Phosphoglucomutase/phosphomannomutase, alpha/beta/alpha domain III;Phosphoglucomutase/phosphomannomutase, C-terminal domain;Phosphoglucomutase/phosphomannomutase, alpha/beta/alpha domain II	COG1109	Phosphomannomutase	GO:0005975;GO:0000287;GO:0008966	carbohydrate metabolic process;;magnesium ion binding;;phosphoglucosamine mutase activity	K03431	phosphoglucosamine mutase [EC:5.4.2.10]	5.4.2.10	Isomerases; Intramolecular transferases; Phosphotransferases (phosphomutases); alpha-D-glucosamine 1,6-phosphomutase
gene0239	glmS	MULTISPECIES: glutamine--fructose-6-phosphate transaminase (isomerizing)	RP01	Chromosome	Chromosome	+	211805	213607	1803	MULTISPECIES: glutamine--fructose-6-phosphate transaminase (isomerizing)	RecName: Full=Glutamine--fructose-6-phosphate aminotransferase [isomerizing]; AltName: Full=D-fructose-6-phosphate amidotransferase; AltName: Full=GFAT; AltName: Full=Glucosamine-6-phosphate synthase; AltName: Full=Hexosephosphate aminotransferase; AltName: Full=L-glutamine--D-fructose-6-phosphate amidotransferase [Bacillus licheniformis DSM 13 = ATCC 14580]	PF01380;PF01380;PF13522;PF13537;PF13230	SIS;SIS;GATase_6;GATase_7;GATase_4	SIS domain;SIS domain;Glutamine amidotransferase domain;Glutamine amidotransferase domain;Glutamine amidotransferases class-II	COG0449	Glucosamine 6-phosphate synthetase, contains amidotransferase and phosphosugar isomerase domains	GO:0005975;GO:0006541;GO:1901137;GO:0005737;GO:0097367;GO:0004360	carbohydrate metabolic process;;glutamine metabolic process;;carbohydrate derivative biosynthetic process;;cytoplasm;;carbohydrate derivative binding;;glutamine-fructose-6-phosphate transaminase (isomerizing) activity	K00820	glutamine---fructose-6-phosphate transaminase (isomerizing) [EC:2.6.1.16]	2.6.1.16	Transferases; Transferring nitrogenous groups; Transaminases; L-glutamine:D-fructose-6-phosphate isomerase (deaminating)
gene0240	-	MULTISPECIES: hypothetical protein	RP01	Chromosome	Chromosome	+	213757	214077	321	MULTISPECIES: hypothetical protein	-	-	-	-	-	-	-	-	-	-	-	-
gene0241	-	MULTISPECIES: ABC-2 transporter permease	RP01	Chromosome	Chromosome	-	214825	214217	609	MULTISPECIES: ABC-2 transporter permease	-	PF13346	ABC2_membrane_5	ABC-2 family transporter protein	-	-	-	-	K01992	ABC-2 type transport system permease protein	-	-
gene0242	-	MULTISPECIES: ABC transporter ATP-binding protein	RP01	Chromosome	Chromosome	-	215687	214806	882	MULTISPECIES: ABC transporter ATP-binding protein	RecName: Full=ABC transporter ATP-binding protein YtrB [Bacillus subtilis subsp. subtilis str. 168]	PF00005;PF13304	ABC_tran;AAA_21	ABC transporter;AAA domain, putative AbiEii toxin, Type IV TA system	COG1131	ABC-type multidrug transport system, ATPase component	-	-	K01990	ABC-2 type transport system ATP-binding protein	-	-
gene0243	-	MULTISPECIES: GntR family transcriptional regulator	RP01	Chromosome	Chromosome	-	216064	215687	378	MULTISPECIES: GntR family transcriptional regulator	RecName: Full=HTH-type transcriptional repressor YtrA [Bacillus subtilis subsp. subtilis str. 168]	PF00392	GntR	Bacterial regulatory proteins, gntR family	COG1725	DNA-binding transcriptional regulator YhcF, GntR family	GO:0003700	DNA-binding transcription factor activity	-	-	-	-
gene0244	-	MULTISPECIES: DUF4870 domain-containing protein	RP01	Chromosome	Chromosome	+	216224	216580	357	MULTISPECIES: DUF4870 domain-containing protein	-	PF09685	DUF4870	Domain of unknown function (DUF4870)	-	-	-	-	-	-	-	-
gene0245	-	MULTISPECIES: MerR family transcriptional regulator	RP01	Chromosome	Chromosome	+	216570	217304	735	MULTISPECIES: MerR family transcriptional regulator	RecName: Full=HTH-type transcriptional activator TipA [Streptomyces coelicolor A3(2)] >lcl|P0A4T9.1 RecName: Full=HTH-type transcriptional activator TipA [Streptomyces lividans]	PF13411;PF00376	MerR_1;MerR	MerR HTH family regulatory protein;MerR family regulatory protein	COG0789	DNA-binding transcriptional regulator, MerR family	-	-	-	-	-	-
gene0246	-	MULTISPECIES: small multi-drug export protein	RP01	Chromosome	Chromosome	+	217395	217889	495	MULTISPECIES: small multi-drug export protein	-	PF06695	Sm_multidrug_ex	Putative small multi-drug export protein	-	-	-	-	-	-	-	-
gene0247	-	MULTISPECIES: helix-turn-helix domain-containing protein	RP01	Chromosome	Chromosome	+	218355	218603	249	MULTISPECIES: helix-turn-helix domain-containing protein	RecName: Full=Uncharacterized HTH-type transcriptional regulator YbzH [Bacillus subtilis subsp. subtilis str. 168]	PF01022	HTH_5	Bacterial regulatory protein, arsR family	COG0640	DNA-binding transcriptional regulator, ArsR family	GO:0003700	DNA-binding transcription factor activity	-	-	-	-
gene0248	ybcL	MULTISPECIES: MFS transporter	RP01	Chromosome	Chromosome	+	218745	219926	1182	MULTISPECIES: MFS transporter	RecName: Full=Uncharacterized MFS-type transporter YbcL [Bacillus subtilis subsp. subtilis str. 168]	PF07690;PF00083	MFS_1;Sugar_tr	Major Facilitator Superfamily;Sugar (and other) transporter	COG2814	Predicted arabinose efflux permease AraJ, MFS family	-	-	K08164	MFS transporter, DHA1 family, putative efflux transporter	-	-
gene0249	-	MULTISPECIES: DinB family protein	RP01	Chromosome	Chromosome	-	220588	220064	525	MULTISPECIES: DinB family protein	-	PF12867	DinB_2	DinB superfamily	-	-	-	-	-	-	-	-
gene0250	abcA	MULTISPECIES: ABC transporter ATP-binding protein/permease	RP01	Chromosome	Chromosome	-	222350	220614	1737	MULTISPECIES: ABC transporter ATP-binding protein/permease	RecName: Full=Multidrug resistance ABC transporter ATP-binding/permease protein BmrA [Bacillus subtilis subsp. subtilis str. 168]	PF00664;PF00005	ABC_membrane;ABC_tran	ABC transporter transmembrane region;ABC transporter	COG1132	ABC-type multidrug transport system, ATPase and permease component	-	-	K18104	ATP-binding cassette, subfamily B, bacterial AbcA/BmrA [EC:7.6.2.2]	7.6.2.2	Translocases; Catalysing the translocation of other compounds; Linked to the hydrolysis of a nucleoside triphosphate; ATP phosphohydrolase (ABC-type, xenobiotic-exporting)
gene0251	-	MULTISPECIES: DsbA family oxidoreductase	RP01	Chromosome	Chromosome	+	222546	223190	645	MULTISPECIES: DsbA family oxidoreductase	RecName: Full=Uncharacterized protein YwbO [Bacillus subtilis subsp. subtilis str. 168]	PF01323;PF13462;PF13743	DSBA;Thioredoxin_4;Thioredoxin_5	DSBA-like thioredoxin domain;Thioredoxin;Thioredoxin	COG2761	Predicted dithiol-disulfide isomerase, DsbA/YjbH family (virulence, stress resistance)	-	-	-	-	-	-
gene0252	-	MULTISPECIES: hypothetical protein	RP01	Chromosome	Chromosome	+	223265	223684	420	MULTISPECIES: hypothetical protein	-	-	-	-	-	-	-	-	-	-	-	-
gene0253	ereA_B	MULTISPECIES: erythromycin esterase family protein	RP01	Chromosome	Chromosome	+	223932	225071	1140	MULTISPECIES: erythromycin esterase family protein	RecName: Full=Putative hydrolase YbfO; Flags: Precursor [Bacillus subtilis subsp. subtilis str. 168]	PF05139	Erythro_esteras	Erythromycin esterase	COG2312	Erythromycin esterase homolog	-	-	K06880	erythromycin esterase [EC:3.1.1.-]	-	-
gene0254	-	MULTISPECIES: hypothetical protein	RP01	Chromosome	Chromosome	+	225268	225405	138	MULTISPECIES: hypothetical protein	-	-	-	-	-	-	-	-	-	-	-	-
gene0255	aadK	MULTISPECIES: aminoglycoside 6-adenylyltransferase	RP01	Chromosome	Chromosome	+	225641	226510	870	MULTISPECIES: aminoglycoside 6-adenylyltransferase	RecName: Full=Aminoglycoside 6-adenylyltransferase; AltName: Full=AAD(6); AltName: Full=Sm inactivating enzyme [Bacillus subtilis subsp. subtilis str. 168]	PF04439	Adenyl_transf	Streptomycin adenylyltransferase	-	-	GO:0016779	nucleotidyltransferase activity	K05593	aminoglycoside 6-adenylyltransferase [EC:2.7.7.-]	-	-
gene0256	spcN	MULTISPECIES: aminoglycoside phosphotransferase family protein	RP01	Chromosome	Chromosome	+	226574	227521	948	MULTISPECIES: aminoglycoside phosphotransferase family protein	-	PF01636;PF01633	APH;Choline_kinase	Phosphotransferase enzyme family;Choline/ethanolamine kinase	COG3173	Predicted kinase, aminoglycoside phosphotransferase (APT) family	-	-	K18844	spectinomycin phosphotransferase	-	-
gene0257	-	MULTISPECIES: YjjG family noncanonical pyrimidine nucleotidase	RP01	Chromosome	Chromosome	+	227544	228251	708	MULTISPECIES: YjjG family noncanonical pyrimidine nucleotidase	RecName: Full=Putative HAD-hydrolase YfnB [Bacillus subtilis subsp. subtilis str. 168]	PF13419;PF00702;PF13242	HAD_2;Hydrolase;Hydrolase_like	Haloacid dehalogenase-like hydrolase;haloacid dehalogenase-like hydrolase;HAD-hyrolase-like	COG1011	FMN and 5-amino-6-(5-phospho-D-ribitylamino)uracil phosphatase YigB, HAD superfamily (riboflavin biosynthesis)	GO:0016787	hydrolase activity	K01560	2-haloacid dehalogenase [EC:3.8.1.2]	3.8.1.2	Hydrolases; Acting on halide bonds; In carbon-halide compounds; (S)-2-haloacid halidohydrolase
gene0258	-	MULTISPECIES: alpha/beta fold hydrolase	RP01	Chromosome	Chromosome	+	228400	229128	729	MULTISPECIES: alpha/beta fold hydrolase	-	PF12695;PF00561	Abhydrolase_5;Abhydrolase_1	Alpha/beta hydrolase family;alpha/beta hydrolase fold	COG0412	Dienelactone hydrolase	-	-	-	-	-	-
gene0259	-	LysR family transcriptional regulator	RP01	Chromosome	Chromosome	-	230106	229213	894	LysR family transcriptional regulator	RecName: Full=Uncharacterized HTH-type transcriptional regulator YeiE [Escherichia coli K-12] >lcl|P0ACR5.1 RecName: Full=Uncharacterized HTH-type transcriptional regulator YeiE [Escherichia coli CFT073] >lcl|P0ACR6.1 RecName: Full=Uncharacterized HTH-type transcriptional regulator YeiE [Escherichia coli O157:H7]	PF03466;PF00126	LysR_substrate;HTH_1	LysR substrate binding domain;Bacterial regulatory helix-turn-helix protein, lysR family	COG0583	DNA-binding transcriptional regulator, LysR family	-	-	-	-	-	-
gene0260	-	MULTISPECIES: ATP-grasp domain-containing protein	RP01	Chromosome	Chromosome	+	230229	231446	1218	MULTISPECIES: ATP-grasp domain-containing protein	RecName: Full=L-arginine-specific L-amino acid ligase; AltName: Full=L-amino acid ligase RizA [Bacillus subtilis]	PF02222;PF02655	ATP-grasp;ATP-grasp_3	ATP-grasp domain;ATP-grasp domain	COG0439	Biotin carboxylase	-	-	-	-	-	-
gene0261	-	MULTISPECIES: MFS transporter	RP01	Chromosome	Chromosome	+	231520	232656	1137	MULTISPECIES: MFS transporter	RecName: Full=Uncharacterized MFS-type transporter YqjV [Bacillus subtilis subsp. subtilis str. 168]	PF07690;PF07690;PF05977;PF05977;PF00083	MFS_1;MFS_1;MFS_3;MFS_3;Sugar_tr	Major Facilitator Superfamily;Major Facilitator Superfamily;Transmembrane secretion effector;Transmembrane secretion effector;Sugar (and other) transporter	COG2814	Predicted arabinose efflux permease AraJ, MFS family	-	-	-	-	-	-
gene0262	-	MULTISPECIES: hypothetical protein	RP01	Chromosome	Chromosome	+	232728	232976	249	MULTISPECIES: hypothetical protein	RecName: Full=Sigma-G-dependent sporulation-specific SASP protein [Bacillus subtilis subsp. subtilis str. 168]	PF17334	CsgA	Minor curli fiber component A	COG5862	Small acid-soluble spore protein CsgA	-	-	-	-	-	-
gene0263	-	MULTISPECIES: YbxH family protein	RP01	Chromosome	Chromosome	+	232993	233184	192	MULTISPECIES: YbxH family protein	RecName: Full=Uncharacterized protein YbxH; AltName: Full=ORF3 [Bacillus subtilis subsp. subtilis str. 168]	PF17340	DUF5370	Family of unknown function (DUF5370)	-	-	-	-	-	-	-	-
gene0264	-	MULTISPECIES: hypothetical protein	RP01	Chromosome	Chromosome	-	233569	233303	267	MULTISPECIES: hypothetical protein	RecName: Full=Uncharacterized protein YbyB; Flags: Precursor [Bacillus subtilis subsp. subtilis str. 168]	-	-	-	-	-	-	-	-	-	-	-
gene0265	-	thioredoxin domain-containing protein	RP01	Chromosome	Chromosome	-	235505	233628	1878	thioredoxin domain-containing protein	RecName: Full=Uncharacterized protein YyaL [Bacillus subtilis subsp. subtilis str. 168]	PF03190	Thioredox_DsbH	Protein of unknown function, DUF255	COG1331	Uncharacterized conserved protein YyaL, SSP411 family, contains thoiredoxin and six-hairpin glycosidase-like domains	-	-	K06888	uncharacterized protein	-	-
gene0266	-	MULTISPECIES: DUF255 domain-containing protein	RP01	Chromosome	Chromosome	-	235705	235544	162	MULTISPECIES: DUF255 domain-containing protein	RecName: Full=Uncharacterized protein YyaO [Bacillus subtilis subsp. subtilis str. 168]	PF03190	Thioredox_DsbH	Protein of unknown function, DUF255	COG1331	Uncharacterized conserved protein YyaL, SSP411 family, contains thoiredoxin and six-hairpin glycosidase-like domains	GO:0016301	kinase activity	-	-	-	-
gene0267	-	MULTISPECIES: class I SAM-dependent methyltransferase	RP01	Chromosome	Chromosome	-	236743	235985	759	MULTISPECIES: class I SAM-dependent methyltransferase	RecName: Full=Uncharacterized protein HI_0912 [Haemophilus influenzae Rd KW20]	PF08241;PF13649;PF13847;PF13489;PF08242;PF01209;PF05175;PF03848;PF07021;PF05401;PF06325	Methyltransf_11;Methyltransf_25;Methyltransf_31;Methyltransf_23;Methyltransf_12;Ubie_methyltran;MTS;TehB;MetW;NodS;PrmA	Methyltransferase domain;Methyltransferase domain;Methyltransferase domain;Methyltransferase domain;Methyltransferase domain;ubiE/COQ5 methyltransferase family;Methyltransferase small domain;Tellurite resistance protein TehB;Methionine biosynthesis protein MetW;Nodulation protein S (NodS);Ribosomal protein L11 methyltransferase (PrmA)	COG2227	2-polyprenyl-3-methyl-5-hydroxy-6-metoxy-1,4-benzoquinol methylase	-	-	-	-	-	-
gene0268	-	MULTISPECIES: aminotransferase class I/II-fold pyridoxal phosphate-dependent enzyme	RP01	Chromosome	Chromosome	-	238216	236777	1440	MULTISPECIES: aminotransferase class I/II-fold pyridoxal phosphate-dependent enzyme	RecName: Full=Glutamate decarboxylase 1 [Pongo abelii]	PF00282;PF01212;PF00155;PF00266	Pyridoxal_deC;Beta_elim_lyase;Aminotran_1_2;Aminotran_5	Pyridoxal-dependent decarboxylase conserved domain;Beta-eliminating lyase;Aminotransferase class I and II;Aminotransferase class-V	COG0076	Glutamate or tyrosine decarboxylase or a related PLP-dependent protein	-	-	-	-	-	-
gene0269	-	Oxygen-insensitive NAD(P)H nitroreductase / Dihydropteridine reductase	RP01	Chromosome	Chromosome	+	238507	238830	324	Oxygen-insensitive NAD(P)H nitroreductase / Dihydropteridine reductase	RecName: Full=Putative NAD(P)H nitroreductase MhqN [Bacillus subtilis subsp. subtilis str. 168]	PF00881	Nitroreductase	Nitroreductase family	COG0778	Nitroreductase	GO:0016491	oxidoreductase activity	K15976	putative NAD(P)H nitroreductase [EC:1.-.-.-]	-	-
gene0270	-	Oxygen-insensitive NAD(P)H nitroreductase / Dihydropteridine reductase	RP01	Chromosome	Chromosome	+	238834	239124	291	Oxygen-insensitive NAD(P)H nitroreductase / Dihydropteridine reductase	RecName: Full=Putative NAD(P)H nitroreductase MhqN [Bacillus subtilis subsp. subtilis str. 168]	PF00881	Nitroreductase	Nitroreductase family	COG0778	Nitroreductase	-	-	K15976	putative NAD(P)H nitroreductase [EC:1.-.-.-]	-	-
gene0271	-	hypothetical protein	RP01	Chromosome	Chromosome	-	239820	239164	657	hypothetical protein	RecName: Full=Uncharacterized HTH-type transcriptional regulator YdhC [Bacillus subtilis subsp. subtilis str. 168]	PF07729;PF00392;PF13412	FCD;GntR;HTH_24	FCD domain;Bacterial regulatory proteins, gntR family;Winged helix-turn-helix DNA-binding	COG1802	DNA-binding transcriptional regulator, GntR family	-	-	-	-	-	-
gene0272	-	MULTISPECIES: sulfite exporter TauE/SafE family protein	RP01	Chromosome	Chromosome	-	240641	239904	738	MULTISPECIES: sulfite exporter TauE/SafE family protein	RecName: Full=Probable membrane transporter protein YdhB [Bacillus subtilis subsp. subtilis str. 168]	PF01925	TauE	Sulfite exporter TauE/SafE	COG0730	Sulfite exporter TauE/SafE/YfcA and related permeases, UPF0721 family	-	-	K07090	uncharacterized protein	-	-
gene0273	qorB	MULTISPECIES: SDR family oxidoreductase	RP01	Chromosome	Chromosome	+	240908	241780	873	MULTISPECIES: SDR family oxidoreductase	RecName: Full=Quinone oxidoreductase 2 [Escherichia coli K-12]	PF05368;PF13460;PF01073;PF07993	NmrA;NAD_binding_10;3Beta_HSD;NAD_binding_4	NmrA-like family;NAD(P)H-binding;3-beta hydroxysteroid dehydrogenase/isomerase family;Male sterility protein	COG0702	Uncharacterized conserved protein YbjT, contains NAD(P)-binding and DUF2867 domains	-	-	K19267	NAD(P)H dehydrogenase (quinone) [EC:1.6.5.2]	1.6.5.2	Oxidoreductases; Acting on NADH or NADPH; With a quinone or similar compound as acceptor; NAD(P)H:quinone oxidoreductase
gene0274	-	MULTISPECIES: hypothetical protein	RP01	Chromosome	Chromosome	-	242179	241835	345	MULTISPECIES: hypothetical protein	-	-	-	-	-	-	-	-	-	-	-	-
gene0275	-	MULTISPECIES: DUF1648 domain-containing protein	RP01	Chromosome	Chromosome	-	242765	242259	507	MULTISPECIES: DUF1648 domain-containing protein	RecName: Full=Uncharacterized protein AF_0163 [Archaeoglobus fulgidus DSM 4304]	PF07853	DUF1648	Protein of unknown function (DUF1648)	COG5658	Bacterial immunity/signal transduction membrane protein SdpI, SdpI/YbgB/DUF1648 family	-	-	-	-	-	-
gene0276	yjbB	MULTISPECIES: Na/Pi cotransporter family protein	RP01	Chromosome	Chromosome	+	243006	244640	1635	MULTISPECIES: Na/Pi cotransporter family protein	RecName: Full=Uncharacterized protein YjbB [Salmonella enterica subsp. enterica serovar Typhimurium str. LT2]	PF02690;PF02690;PF01895;PF01895	Na_Pi_cotrans;Na_Pi_cotrans;PhoU;PhoU	Na+/Pi-cotransporter;Na+/Pi-cotransporter;PhoU domain;PhoU domain	COG1283	Na+/phosphate symporter	-	-	K03324	phosphate:Na+ symporter	-	-
gene0277	-	MULTISPECIES: hypothetical protein	RP01	Chromosome	Chromosome	+	244790	245050	261	MULTISPECIES: hypothetical protein	RecName: Full=Uncharacterized membrane protein YubF [Bacillus subtilis subsp. subtilis str. 168]	PF05360	YiaAB	yiaA/B two helix domain	COG4682	Uncharacterized membrane protein YiaA	GO:0016021	integral component of membrane	-	-	-	-
gene0278	-	hypothetical protein	RP01	Chromosome	Chromosome	-	245538	245083	456	hypothetical protein	RecName: Full=Uncharacterized protein YbfF [Bacillus subtilis subsp. subtilis str. 168]	-	-	-	-	-	-	-	-	-	-	-
gene0279	-	hypothetical protein	RP01	Chromosome	Chromosome	-	246053	245607	447	hypothetical protein	RecName: Full=Uncharacterized protein YbfF [Bacillus subtilis subsp. subtilis str. 168]	-	-	-	-	-	-	-	-	-	-	-
gene0280	-	MULTISPECIES: hypothetical protein	RP01	Chromosome	Chromosome	-	246555	246091	465	MULTISPECIES: hypothetical protein	RecName: Full=Uncharacterized protein YbfF [Bacillus subtilis subsp. subtilis str. 168]	-	-	-	-	-	-	-	-	-	-	-
gene0281	-	MULTISPECIES: DUF2000 domain-containing protein	RP01	Chromosome	Chromosome	-	247270	246851	420	MULTISPECIES: DUF2000 domain-containing protein	-	PF09391	DUF2000	Protein of unknown function (DUF2000)	COG4954	Uncharacterized conserved protein, DUF2000 domain	-	-	-	-	-	-
gene0282	-	MULTISPECIES: DMT family transporter	RP01	Chromosome	Chromosome	-	248175	247267	909	MULTISPECIES: DMT family transporter	RecName: Full=Uncharacterized transporter YbhF [Bacillus subtilis subsp. subtilis str. 168]	PF00892;PF00892	EamA;EamA	EamA-like transporter family;EamA-like transporter family	COG0697	Permease of the drug/metabolite transporter (DMT) superfamily	-	-	-	-	-	-
gene0283	-	MULTISPECIES: AraC family transcriptional regulator	RP01	Chromosome	Chromosome	-	249008	248172	837	MULTISPECIES: AraC family transcriptional regulator	RecName: Full=Uncharacterized HTH-type transcriptional regulator YbfI [Bacillus subtilis subsp. subtilis str. 168]	PF02311;PF12833;PF00165	AraC_binding;HTH_18;HTH_AraC	AraC-like ligand binding domain;Helix-turn-helix domain;Bacterial regulatory helix-turn-helix proteins, AraC family	COG2207	AraC-type DNA-binding domain and AraC-containing proteins	-	-	-	-	-	-
gene0284	-	MULTISPECIES: helix-turn-helix domain-containing protein	RP01	Chromosome	Chromosome	+	249261	249728	468	MULTISPECIES: helix-turn-helix domain-containing protein	-	PF13560;PF01381	HTH_31;HTH_3	Helix-turn-helix domain;Helix-turn-helix	COG1476	DNA-binding transcriptional regulator, XRE-family HTH domain	GO:0003677	DNA binding	-	-	-	-
gene0285	-	hypothetical protein	RP01	Chromosome	Chromosome	-	250893	249847	1047	hypothetical protein	-	PF00196	GerE	Bacterial regulatory proteins, luxR family	COG2771	DNA-binding transcriptional regulator, CsgD family	-	-	-	-	-	-
gene0286	cmoA	MULTISPECIES: methyltransferase	RP01	Chromosome	Chromosome	+	251005	251697	693	MULTISPECIES: methyltransferase	RecName: Full=Ubiquinone biosynthesis O-methyltransferase; AltName: Full=2-polyprenyl-6-hydroxyphenol methylase; AltName: Full=3-demethylubiquinone 3-O-methyltransferase [Aeromonas salmonicida subsp. salmonicida A449]	PF08242;PF13649;PF13489;PF08241;PF13847	Methyltransf_12;Methyltransf_25;Methyltransf_23;Methyltransf_11;Methyltransf_31	Methyltransferase domain;Methyltransferase domain;Methyltransferase domain;Methyltransferase domain;Methyltransferase domain	COG2226	Ubiquinone/menaquinone biosynthesis C-methylase UbiE/MenG	-	-	K15256	tRNA (cmo5U34)-methyltransferase [EC:2.1.1.-]	-	-
gene0287	-	MULTISPECIES: saccharopine dehydrogenase NADP-binding domain-containing protein	RP01	Chromosome	Chromosome	+	251694	252809	1116	MULTISPECIES: saccharopine dehydrogenase NADP-binding domain-containing protein	-	PF03435	Sacchrp_dh_NADP	Saccharopine dehydrogenase NADP binding domain	COG1748	Saccharopine dehydrogenase, NADP-dependent	-	-	K00290	saccharopine dehydrogenase (NAD+, L-lysine forming) [EC:1.5.1.7]	1.5.1.7	Oxidoreductases; Acting on the CH-NH group of donors; With NAD+ or NADP+ as acceptor; N6-(L-1,3-dicarboxypropyl)-L-lysine:NAD+ oxidoreductase (L-lysine-forming)
gene0288	hcxA	MULTISPECIES: iron-containing alcohol dehydrogenase family protein	RP01	Chromosome	Chromosome	+	252827	253882	1056	MULTISPECIES: iron-containing alcohol dehydrogenase family protein	RecName: Full=Hydroxycarboxylate dehydrogenase A; AltName: Full=2-oxobutanoate reductase; AltName: Full=2-oxoglutarate reductase [Escherichia coli K-12]	PF00465;PF13685	Fe-ADH;Fe-ADH_2	Iron-containing alcohol dehydrogenase;Iron-containing alcohol dehydrogenase	COG0371	Glycerol dehydrogenase or related enzyme, iron-containing ADH family	GO:0046872;GO:0016614	metal ion binding;;oxidoreductase activity, acting on CH-OH group of donors	K08317	hydroxycarboxylate dehydrogenase A [EC:1.1.1.-]	-	-
gene0289	-	MULTISPECIES: SurA N-terminal domain-containing protein	RP01	Chromosome	Chromosome	-	254700	253933	768	MULTISPECIES: SurA N-terminal domain-containing protein	RecName: Full=Foldase protein PrsA; Flags: Precursor [Clostridium perfringens str. 13]	PF13624;PF13623;PF09312	SurA_N_3;SurA_N_2;SurA_N	SurA N-terminal domain;SurA N-terminal domain;SurA N-terminal domain	COG0760	Peptidyl-prolyl isomerase, parvulin family	-	-	-	-	-	-
gene0290	-	MULTISPECIES: sulfotransferase family 2 domain-containing protein	RP01	Chromosome	Chromosome	-	255619	254855	765	MULTISPECIES: sulfotransferase family 2 domain-containing protein	-	PF03567	Sulfotransfer_2	Sulfotransferase family	-	-	GO:0016021;GO:0008146	integral component of membrane;;sulfotransferase activity	-	-	-	-
gene0291	vgb	Virginiamycin B lyase	RP01	Chromosome	Chromosome	+	255962	256849	888	Virginiamycin B lyase	RecName: Full=Virginiamycin B lyase; AltName: Full=Streptogramin B lyase [Bacillus licheniformis DSM 13 = ATCC 14580]	-	-	-	COG4257	Streptogramin lyase	GO:0046677;GO:0017001;GO:0000287;GO:0016835	response to antibiotic;;antibiotic catabolic process;;magnesium ion binding;;carbon-oxygen lyase activity	K18235	virginiamycin B lyase [EC:4.2.99.-]	-	-
gene0292	-	MULTISPECIES: DUF2512 family protein	RP01	Chromosome	Chromosome	-	257264	256884	381	MULTISPECIES: DUF2512 family protein	RecName: Full=Uncharacterized protein YcbP; AltName: Full=ORF15 [Bacillus subtilis subsp. subtilis str. 168]	PF10710	DUF2512	Protein of unknown function (DUF2512)	-	-	GO:0016021	integral component of membrane	-	-	-	-
gene0293	hutM	MULTISPECIES: S-methylmethionine permease	RP01	Chromosome	Chromosome	-	258118	257291	828	MULTISPECIES: S-methylmethionine permease	RecName: Full=Uncharacterized amino acid permease YbgF [Bacillus subtilis subsp. subtilis str. 168]	PF00324;PF13520	AA_permease;AA_permease_2	Amino acid permease;Amino acid permease	COG0833	Amino acid permease	GO:0055085;GO:0006865;GO:0016021	transmembrane transport;;amino acid transport;;integral component of membrane	K16236	histidine permease	-	-
gene0294	hutM	Amino-acid permease RocC	RP01	Chromosome	Chromosome	-	258745	258227	519	Amino-acid permease RocC	RecName: Full=Uncharacterized amino acid permease YbgF [Bacillus subtilis subsp. subtilis str. 168]	PF00324;PF13520	AA_permease;AA_permease_2	Amino acid permease;Amino acid permease	COG0833	Amino acid permease	GO:0055085;GO:0006865;GO:0016021	transmembrane transport;;amino acid transport;;integral component of membrane	K16236	histidine permease	-	-
gene0295	mmuM	MULTISPECIES: homocysteine S-methyltransferase	RP01	Chromosome	Chromosome	-	259692	258745	948	MULTISPECIES: homocysteine S-methyltransferase	RecName: Full=Homocysteine S-methyltransferase YbgG; AltName: Full=S-methylmethionine:homocysteine methyltransferase [Bacillus subtilis subsp. subtilis str. 168]	PF02574	S-methyl_trans	Homocysteine S-methyltransferase	COG2040	Homocysteine/selenocysteine methylase (S-methylmethionine-dependent)	GO:0032259;GO:0009086;GO:0008270;GO:0047150	methylation;;methionine biosynthetic process;;zinc ion binding;;betaine-homocysteine S-methyltransferase activity	K00547	homocysteine S-methyltransferase [EC:2.1.1.10]	2.1.1.10	Transferases; Transferring one-carbon groups; Methyltransferases; S-methyl-L-methionine:L-homocysteine S-methyltransferase
gene0296	chbG	chitin disaccharide deacetylase	RP01	Chromosome	Chromosome	+	259904	260644	741	chitin disaccharide deacetylase	RecName: Full=Carbohydrate deacetylase [Bacillus cereus 03BB102]	PF04794	YdjC	YdjC-like protein	COG3394	Chitooligosaccharide deacetylase ChbG, YdjC/CelG family	-	-	K03478	chitin disaccharide deacetylase [EC:3.5.1.105]	3.5.1.105	Hydrolases; Acting on carbon-nitrogen bonds, other than peptide bonds; In linear amides; N,N'-diacetylchitobiose acetylhydrolase
gene0297	nagE	MULTISPECIES: PTS transporter subunit EIIC	RP01	Chromosome	Chromosome	+	260658	262031	1374	MULTISPECIES: PTS transporter subunit EIIC	RecName: Full=Putative PTS system glucosamine-specific EIICBA component; Includes: RecName: Full=Glucosamine permease IIC component; AltName: Full=PTS system glucosamine-specific EIIC component; Includes: RecName: Full=Glucosamine-specific phosphotransferase enzyme IIB component; AltName: Full=PTS system glucosamine-specific EIIB component; Includes: RecName: Full=Glucosamine-specific phosphotran…	PF02378;PF00367	PTS_EIIC;PTS_EIIB	Phosphotransferase system, EIIC;phosphotransferase system, EIIB	COG1263	Phosphotransferase system IIC components, glucose/maltose/N-acetylglucosamine-specific	-	-	K02804	N-acetylglucosamine PTS system EIICBA or EIICB component [EC:2.7.1.193]	2.7.1.193	Transferases; Transferring phosphorus-containing groups; Phosphotransferases with an alcohol group as acceptor; protein-Npi-phospho-L-histidine:N-acetyl-D-glucosamine Npi-phosphotransferase
gene0298	-	MULTISPECIES: MerR family transcriptional regulator	RP01	Chromosome	Chromosome	+	262153	262929	777	MULTISPECIES: MerR family transcriptional regulator	RecName: Full=HTH-type transcriptional activator mta; AltName: Full=Multidrug transporter activation protein [Bacillus subtilis subsp. subtilis str. 168]	PF13411;PF00376;PF07739	MerR_1;MerR;TipAS	MerR HTH family regulatory protein;MerR family regulatory protein;TipAS antibiotic-recognition domain	COG0789	DNA-binding transcriptional regulator, MerR family	-	-	-	-	-	-
gene0299	-	MULTISPECIES: DUF421 domain-containing protein	RP01	Chromosome	Chromosome	-	263670	262948	723	MULTISPECIES: DUF421 domain-containing protein	RecName: Full=UPF0702 transmembrane protein YdfS [Bacillus subtilis subsp. subtilis str. 168]	PF04239	DUF421	Protein of unknown function (DUF421)	COG2323	Uncharacterized membrane protein YcaP, DUF421 family	-	-	-	-	-	-
gene0300	-	MULTISPECIES: carbonic anhydrase	RP01	Chromosome	Chromosome	-	264368	263658	711	MULTISPECIES: carbonic anhydrase	RecName: Full=Carbonic anhydrase; Flags: Precursor [Methanosarcina thermophila]	PF00132;PF00132;PF00132;PF00132	Hexapep;Hexapep;Hexapep;Hexapep	Bacterial transferase hexapeptide (six repeats);Bacterial transferase hexapeptide (six repeats);Bacterial transferase hexapeptide (six repeats);Bacterial transferase hexapeptide (six repeats)	COG0663	Carbonic anhydrase or acetyltransferase, isoleucine patch superfamily	-	-	K01743	carbonic anhydrase [EC:4.2.1.1]	4.2.1.1	Lyases; Carbon-oxygen lyases; Hydro-lyases; carbonic acid hydro-lyase (carbon-dioxide-forming)
gene0301	-	hypothetical protein	RP01	Chromosome	Chromosome	+	264932	265066	135	hypothetical protein	-	-	-	-	-	-	-	-	-	-	-	-
gene0302	-	MULTISPECIES: DUF2809 domain-containing protein	RP01	Chromosome	Chromosome	-	265685	265287	399	MULTISPECIES: DUF2809 domain-containing protein	RecName: Full=Uncharacterized membrane protein YjgA [Bacillus subtilis subsp. subtilis str. 168]	PF10990	DUF2809	Protein of unknown function (DUF2809)	-	-	GO:0016021	integral component of membrane	-	-	-	-
gene0303	glnT	MULTISPECIES: alanine:cation symporter family protein	RP01	Chromosome	Chromosome	-	267248	265818	1431	MULTISPECIES: alanine:cation symporter family protein	RecName: Full=Probable sodium/glutamine symporter GlnT [Bacillus subtilis subsp. subtilis str. 168]	PF01235	Na_Ala_symp	Sodium:alanine symporter family	COG1115	Na+/alanine symporter	GO:0016021;GO:0005886;GO:0015655	integral component of membrane;;plasma membrane;;alanine:sodium symporter activity	K11626	putative sodium/glutamine symporter	-	-
gene0304	glsA	glutaminase	RP01	Chromosome	Chromosome	-	268256	267273	984	glutaminase	RecName: Full=Glutaminase 1 [Bacillus subtilis subsp. subtilis str. 168]	PF04960	Glutaminase	Glutaminase	COG2066	Glutaminase	GO:0006541;GO:0004359	glutamine metabolic process;;glutaminase activity	K01425	glutaminase [EC:3.5.1.2]	3.5.1.2	Hydrolases; Acting on carbon-nitrogen bonds, other than peptide bonds; In linear amides; L-glutamine amidohydrolase
gene0305	glnK	Two-component sensor histidine kinase controling glutamine utilization	RP01	Chromosome	Chromosome	+	268648	269973	1326	Two-component sensor histidine kinase controling glutamine utilization	RecName: Full=Sensor histidine kinase GlnK [Bacillus subtilis subsp. subtilis str. 168]	PF02518	HATPase_c	Histidine kinase-, DNA gyrase B-, and HSP90-like ATPase	COG0642	Signal transduction histidine kinase	-	-	K07717	two-component system, sensor histidine kinase GlnK [EC:2.7.13.3]	2.7.13.3	Transferases; Transferring phosphorus-containing groups; Protein-histidine kinases; ATP:protein-L-histidine N-phosphotransferase
gene0306	glnL	MULTISPECIES: DNA-binding domain-containing protein	RP01	Chromosome	Chromosome	+	269980	270915	936	MULTISPECIES: DNA-binding domain-containing protein	RecName: Full=Transcriptional regulatory protein GlnL [Bacillus subtilis subsp. subtilis str. 168]	PF08664;PF00072	YcbB;Response_reg	YcbB domain;Response regulator receiver domain	COG4753	Two-component response regulator, YesN/AraC family, consists of REC and AraC-type DNA-binding domains	GO:0000160	phosphorelay signal transduction system	K07719	two-component system, response regulator GlnL	-	-
gene0307	rimJ	MULTISPECIES: GNAT family N-acetyltransferase	RP01	Chromosome	Chromosome	-	271494	270958	537	MULTISPECIES: GNAT family N-acetyltransferase	RecName: Full=Uncharacterized N-acetyltransferase p20 [Bacillus licheniformis]	PF13302;PF13420;PF00583	Acetyltransf_3;Acetyltransf_4;Acetyltransf_1	Acetyltransferase (GNAT) domain;Acetyltransferase (GNAT) domain;Acetyltransferase (GNAT) family	COG1670	Protein N-acetyltransferase, RimJ/RimL family	GO:0008080	N-acetyltransferase activity	K03790	[ribosomal protein S5]-alanine N-acetyltransferase [EC:2.3.1.267]	2.3.1.267	Transferases; Acyltransferases; Transferring groups other than aminoacyl groups; acetyl-CoA:N-terminal L-alanyl-[S5 protein of 30S ribosome] N-acetyltransferase
gene0308	blaR1	MULTISPECIES: BlaR1 family beta-lactam sensor/signal transducer	RP01	Chromosome	Chromosome	-	273393	271588	1806	MULTISPECIES: BlaR1 family beta-lactam sensor/signal transducer	RecName: Full=Regulatory protein BlaR1 [Bacillus licheniformis]	PF05569;PF00905;PF01435	Peptidase_M56;Transpeptidase;Peptidase_M48	BlaR1 peptidase M56;Penicillin binding protein transpeptidase domain;Peptidase family M48	COG2602	Beta-lactamase class D	-	-	K02172	bla regulator protein blaR1	-	-
gene0309	blaI	MULTISPECIES: BlaI/MecI/CopY family transcriptional regulator	RP01	Chromosome	Chromosome	-	273781	273395	387	MULTISPECIES: BlaI/MecI/CopY family transcriptional regulator	RecName: Full=Penicillinase repressor; AltName: Full=Beta-lactamase repressor protein; AltName: Full=Regulatory protein BlaI [Bacillus licheniformis]	PF03965	Penicillinase_R	Penicillinase repressor	COG3682	Transcriptional regulator, CopY/TcrY family	GO:0045892;GO:0046677;GO:0003677	negative regulation of transcription, DNA-templated;;response to antibiotic;;DNA binding	K02171	BlaI family transcriptional regulator, penicillinase repressor	-	-
gene0310	penP	MULTISPECIES: class A beta-lactamase BlaP	RP01	Chromosome	Chromosome	+	274146	275069	924	MULTISPECIES: class A beta-lactamase BlaP	RecName: Full=Beta-lactamase; AltName: Full=Penicillinase; Contains: RecName: Full=Large exopenicillinase; Contains: RecName: Full=Small exopenicillinase; Flags: Precursor [Bacillus licheniformis]	PF13354;PF00144	Beta-lactamase2;Beta-lactamase	Beta-lactamase enzyme family;Beta-lactamase	COG2367	Beta-lactamase class A	GO:0046677;GO:0030655;GO:0005886;GO:0008800	response to antibiotic;;beta-lactam antibiotic catabolic process;;plasma membrane;;beta-lactamase activity	K17836	beta-lactamase class A [EC:3.5.2.6]	3.5.2.6	Hydrolases; Acting on carbon-nitrogen bonds, other than peptide bonds; In cyclic amides; beta-lactam hydrolase
gene0311	phoD	alkaline phosphatase	RP01	Chromosome	Chromosome	+	275412	277163	1752	alkaline phosphatase	RecName: Full=Alkaline phosphatase D; Short=APaseD; Flags: Precursor [Bacillus subtilis subsp. subtilis str. 168]	PF09423;PF16655	PhoD;PhoD_N	PhoD-like phosphatase;PhoD-like phosphatase, N-terminal domain	COG3540	Phosphodiesterase/alkaline phosphatase D	-	-	K01113	alkaline phosphatase D [EC:3.1.3.1]	3.1.3.1	Hydrolases; Acting on ester bonds; Phosphoric-monoester hydrolases; phosphate-monoester phosphohydrolase (alkaline optimum)
gene0312	tatA	MULTISPECIES: twin-arginine translocase TatA/TatE family subunit	RP01	Chromosome	Chromosome	+	277185	277397	213	MULTISPECIES: twin-arginine translocase TatA/TatE family subunit	RecName: Full=Sec-independent protein translocase protein TatAd [Bacillus subtilis subsp. subtilis str. 168]	PF02416	TatA_B_E	mttA/Hcf106 family	COG1826	Twin-arginine protein secretion pathway components TatA and TatB	GO:0043953;GO:0005887;GO:0033281;GO:0008320	protein transport by the Tat complex;;integral component of plasma membrane;;TAT protein transport complex;;protein transmembrane transporter activity	K03116	sec-independent protein translocase protein TatA	-	-
gene0313	tatC	twin-arginine translocase subunit TatC	RP01	Chromosome	Chromosome	+	277473	278207	735	twin-arginine translocase subunit TatC	RecName: Full=Sec-independent protein translocase protein TatCd [Bacillus subtilis subsp. subtilis str. 168]	PF00902	TatC	Sec-independent protein translocase protein (TatC)	COG0805	Twin-arginine protein secretion pathway component TatC	-	-	K03118	sec-independent protein translocase protein TatC	-	-
gene0314	kdgD	MULTISPECIES: 5-dehydro-4-deoxyglucarate dehydratase	RP01	Chromosome	Chromosome	+	278402	279328	927	MULTISPECIES: 5-dehydro-4-deoxyglucarate dehydratase	RecName: Full=Probable 5-dehydro-4-deoxyglucarate dehydratase; AltName: Full=5-keto-4-deoxy-glucarate dehydratase; Short=KDGDH [Bacillus licheniformis DSM 13 = ATCC 14580]	PF00701	DHDPS	Dihydrodipicolinate synthetase family	COG0329	4-hydroxy-tetrahydrodipicolinate synthase/N-acetylneuraminate lyase	GO:0042838;GO:0047448	D-glucarate catabolic process;;5-dehydro-4-deoxyglucarate dehydratase activity	K01707	5-dehydro-4-deoxyglucarate dehydratase [EC:4.2.1.41]	4.2.1.41	Lyases; Carbon-oxygen lyases; Hydro-lyases; 5-dehydro-4-deoxy-D-glucarate hydro-lyase (decarboxylating; 2,5-dioxopentanoate-forming)
gene0315	xylA	MULTISPECIES: aldehyde dehydrogenase family protein	RP01	Chromosome	Chromosome	+	279349	280815	1467	MULTISPECIES: aldehyde dehydrogenase family protein	RecName: Full=Alpha-ketoglutaric semialdehyde dehydrogenase; Short=alphaKGSA dehydrogenase; AltName: Full=2,5-dioxovalerate dehydrogenase [Bacillus subtilis subsp. subtilis str. 168]	PF00171	Aldedh	Aldehyde dehydrogenase family	COG1012	Acyl-CoA reductase or other NAD-dependent aldehyde dehydrogenase	-	-	K22187	alpha-ketoglutaric semialdehyde dehydrogenase [EC:1.2.1.-]	-	-
gene0316	gudP	MULTISPECIES: MFS transporter	RP01	Chromosome	Chromosome	+	280856	282232	1377	MULTISPECIES: MFS transporter	RecName: Full=Probable glucarate transporter; AltName: Full=D-glucarate permease [Bacillus subtilis subsp. subtilis str. 168]	PF07690;PF07690	MFS_1;MFS_1	Major Facilitator Superfamily;Major Facilitator Superfamily	COG2271	Sugar phosphate permease	GO:0016021;GO:0005886;GO:0022857	integral component of membrane;;plasma membrane;;transmembrane transporter activity	K03535	MFS transporter, ACS family, glucarate transporter	-	-
gene0317	gudD	glucarate dehydratase	RP01	Chromosome	Chromosome	+	282270	283637	1368	glucarate dehydratase	RecName: Full=Probable glucarate dehydratase; Short=GDH; Short=GlucD [Bacillus subtilis subsp. subtilis str. 168]	PF13378;PF02746	MR_MLE_C;MR_MLE_N	Enolase C-terminal domain-like;Mandelate racemase / muconate lactonizing enzyme, N-terminal domain	COG4948	L-alanine-DL-glutamate epimerase or related enzyme of enolase superfamily	-	-	K01706	glucarate dehydratase [EC:4.2.1.40]	4.2.1.40	Lyases; Carbon-oxygen lyases; Hydro-lyases; D-glucarate hydro-lyase (5-dehydro-4-deoxy-D-glucarate-forming)
gene0318	pdhR	MULTISPECIES: FadR family transcriptional regulator	RP01	Chromosome	Chromosome	+	283732	284445	714	MULTISPECIES: FadR family transcriptional regulator	RecName: Full=Uncharacterized HTH-type transcriptional regulator YcbG [Bacillus subtilis subsp. subtilis str. 168]	PF07729;PF00392	FCD;GntR	FCD domain;Bacterial regulatory proteins, gntR family	COG2186	DNA-binding transcriptional regulator, FadR family	GO:0003677;GO:0003700	DNA binding;;DNA-binding transcription factor activity	K05799	GntR family transcriptional regulator, transcriptional repressor for pyruvate dehydrogenase complex	-	-
gene0319	garD	galactarate dehydratase	RP01	Chromosome	Chromosome	+	284534	286060	1527	galactarate dehydratase	RecName: Full=Probable galactarate dehydratase (L-threo-forming); Short=GalcD [Bacillus subtilis subsp. subtilis str. 168]	PF04295;PF08666	GD_AH_C;SAF	D-galactarate dehydratase / Altronate hydrolase, C terminus;SAF domain	COG2721	Altronate dehydratase	-	-	K01708	galactarate dehydratase [EC:4.2.1.42]	4.2.1.42	Lyases; Carbon-oxygen lyases; Hydro-lyases; galactarate hydro-lyase (5-dehydro-4-deoxy-D-glucarate-forming)
gene0320	-	putative lipoprotein YvcA	RP01	Chromosome	Chromosome	+	286432	287082	651	putative lipoprotein YvcA	RecName: Full=Putative lipoprotein YvcA; Flags: Precursor [Bacillus subtilis subsp. subtilis str. 168]	-	-	-	-	-	-	-	-	-	-	-
gene0321	-	hypothetical protein	RP01	Chromosome	Chromosome	+	287084	289006	1923	hypothetical protein	RecName: Full=Putative uncharacterized protein YvcB [Bacillus subtilis subsp. subtilis str. 168]	-	-	-	-	-	-	-	-	-	-	-
gene0322	-	MULTISPECIES: hypothetical protein	RP01	Chromosome	Chromosome	+	289022	289375	354	MULTISPECIES: hypothetical protein	RecName: Full=Uncharacterized protein YvzA [Bacillus subtilis subsp. subtilis str. 168]	-	-	-	-	-	-	-	-	-	-	-
gene0323	-	two-component response regulator YcbL	RP01	Chromosome	Chromosome	+	289616	290308	693	two-component response regulator YcbL	RecName: Full=Uncharacterized transcriptional regulatory protein YcbL [Bacillus subtilis subsp. subtilis str. 168]	PF00486;PF00072	Trans_reg_C;Response_reg	Transcriptional regulatory protein, C terminal;Response regulator receiver domain	COG0745	DNA-binding response regulator, OmpR family, contains REC and winged-helix (wHTH) domain	GO:0006355;GO:0000160;GO:0005737;GO:0003677	regulation of transcription, DNA-templated;;phosphorelay signal transduction system;;cytoplasm;;DNA binding	-	-	-	-
gene0324	-	MULTISPECIES: HAMP domain-containing histidine kinase	RP01	Chromosome	Chromosome	+	290310	291245	936	MULTISPECIES: HAMP domain-containing histidine kinase	RecName: Full=Sensor histidine kinase YcbM [Bacillus subtilis subsp. subtilis str. 168]	PF02518;PF00512	HATPase_c;HisKA	Histidine kinase-, DNA gyrase B-, and HSP90-like ATPase;His Kinase A (phospho-acceptor) domain	COG2205	K+-sensing histidine kinase KdpD	-	-	-	-	-	-
gene0325	-	MULTISPECIES: ABC transporter ATP-binding protein	RP01	Chromosome	Chromosome	+	291340	292284	945	MULTISPECIES: ABC transporter ATP-binding protein	RecName: Full=Uncharacterized ABC transporter ATP-binding protein YcbN [Bacillus subtilis subsp. subtilis str. 168]	PF00005	ABC_tran	ABC transporter	COG1131	ABC-type multidrug transport system, ATPase component	-	-	K01990	ABC-2 type transport system ATP-binding protein	-	-
gene0326	-	MULTISPECIES: ABC transporter permease	RP01	Chromosome	Chromosome	+	292278	292961	684	MULTISPECIES: ABC transporter permease	RecName: Full=Uncharacterized protein YcbO [Bacillus subtilis subsp. subtilis str. 168]	PF12730	ABC2_membrane_4	ABC-2 family transporter protein	-	-	GO:0016021	integral component of membrane	-	-	-	-
gene0327	-	MULTISPECIES: ABC transporter permease	RP01	Chromosome	Chromosome	+	292977	293675	699	MULTISPECIES: ABC transporter permease	RecName: Full=Uncharacterized protein YcbO [Bacillus subtilis subsp. subtilis str. 168]	PF12730	ABC2_membrane_4	ABC-2 family transporter protein	-	-	-	-	-	-	-	-
gene0328	-	MULTISPECIES: DUF3900 domain-containing protein	RP01	Chromosome	Chromosome	+	293772	294845	1074	MULTISPECIES: DUF3900 domain-containing protein	RecName: Full=Uncharacterized protein YetN [Bacillus subtilis subsp. subtilis str. 168]	PF13039;PF13037	DUF3900;DUF3898	Protein of unknown function (DUF3900);Domain of unknown function (DUF3898)	-	-	-	-	-	-	-	-
gene0329	-	MULTISPECIES: DUF4885 domain-containing protein	RP01	Chromosome	Chromosome	+	294996	296168	1173	MULTISPECIES: DUF4885 domain-containing protein	RecName: Full=Uncharacterized protein YbdO [Bacillus subtilis subsp. subtilis str. 168]	PF16226	DUF4885	Domain of unknown function (DUF4885)	-	-	-	-	-	-	-	-
gene0330	mph	MULTISPECIES: macrolide 2'-phosphotransferase	RP01	Chromosome	Chromosome	+	296587	297498	912	MULTISPECIES: macrolide 2'-phosphotransferase	RecName: Full=Uncharacterized protein YcbJ [Bacillus subtilis subsp. subtilis str. 168]	PF01636	APH	Phosphotransferase enzyme family	COG3173	Predicted kinase, aminoglycoside phosphotransferase (APT) family	-	-	K06979	macrolide phosphotransferase	-	-
gene0331	-	MULTISPECIES: MarR family transcriptional regulator	RP01	Chromosome	Chromosome	-	297952	297533	420	MULTISPECIES: MarR family transcriptional regulator	RecName: Full=Uncharacterized HTH-type transcriptional regulator YwhA [Bacillus subtilis subsp. subtilis str. 168]	PF01047;PF12802;PF13412;PF03965;PF13463	MarR;MarR_2;HTH_24;Penicillinase_R;HTH_27	MarR family;MarR family;Winged helix-turn-helix DNA-binding;Penicillinase repressor;Winged helix DNA-binding domain	COG1846	DNA-binding transcriptional regulator, MarR family	-	-	-	-	-	-
gene0332	fadD	long-chain fatty acid--CoA ligase	RP01	Chromosome	Chromosome	+	298230	299741	1512	long-chain fatty acid--CoA ligase	RecName: Full=Putative acyl--CoA ligase YdaB [Bacillus subtilis subsp. subtilis str. 168]	PF00501;PF13193	AMP-binding;AMP-binding_C	AMP-binding enzyme;AMP-binding enzyme C-terminal domain	COG0318	O-succinylbenzoic acid-CoA ligase MenE or related acyl-CoA synthetase (AMP-forming)	-	-	K01897	long-chain acyl-CoA synthetase [EC:6.2.1.3]	6.2.1.3	Ligases; Forming carbon-sulfur bonds; Acid-thiol ligases; long-chain fatty acid:CoA ligase (AMP-forming)
gene0333	-	MULTISPECIES: serpin family protein	RP01	Chromosome	Chromosome	+	299849	301063	1215	MULTISPECIES: serpin family protein	RecName: Full=Uncharacterized serpin-like protein TK1782 [Thermococcus kodakarensis KOD1]	PF00079	Serpin	Serpin (serine protease inhibitor)	COG4826	Serine protease inhibitor	GO:0005615;GO:0004867	extracellular space;;serine-type endopeptidase inhibitor activity	-	-	-	-
gene0334	-	MULTISPECIES: PPC domain-containing protein	RP01	Chromosome	Chromosome	+	301175	302002	828	MULTISPECIES: PPC domain-containing protein	RecName: Full=Uncharacterized protein YbdN; Flags: Precursor [Bacillus subtilis subsp. subtilis str. 168]	PF04151	PPC	Bacterial pre-peptidase C-terminal domain	COG1075	Triacylglycerol esterase/lipase EstA, alpha/beta hydrolase fold	-	-	-	-	-	-
gene0335	-	MULTISPECIES: DUF4885 family protein	RP01	Chromosome	Chromosome	+	302066	302893	828	MULTISPECIES: DUF4885 family protein	-	PF16226	DUF4885	Domain of unknown function (DUF4885)	-	-	-	-	-	-	-	-
gene0336	-	MULTISPECIES: MerR family transcriptional regulator	RP01	Chromosome	Chromosome	+	303012	303764	753	MULTISPECIES: MerR family transcriptional regulator	RecName: Full=HTH-type transcriptional activator mta; AltName: Full=Multidrug transporter activation protein [Bacillus subtilis subsp. subtilis str. 168]	PF07739;PF13411;PF00376;PF09278	TipAS;MerR_1;MerR;MerR-DNA-bind	TipAS antibiotic-recognition domain;MerR HTH family regulatory protein;MerR family regulatory protein;MerR, DNA binding	COG0789	DNA-binding transcriptional regulator, MerR family	GO:0006355;GO:0003677	regulation of transcription, DNA-templated;;DNA binding	-	-	-	-
gene0337	-	MULTISPECIES: hypothetical protein	RP01	Chromosome	Chromosome	+	303976	304155	180	MULTISPECIES: hypothetical protein	-	-	-	-	-	-	GO:0016021	integral component of membrane	-	-	-	-
gene0338	-	MULTISPECIES: PadR family transcriptional regulator	RP01	Chromosome	Chromosome	+	304171	304518	348	MULTISPECIES: PadR family transcriptional regulator	RecName: Full=Uncharacterized 37.1 kDa protein in transposon TN4556 [Streptomyces fradiae]	PF03551	PadR	Transcriptional regulator PadR-like family	COG1695	DNA-binding transcriptional regulator, PadR family	-	-	-	-	-	-
gene0339	-	MULTISPECIES: DUF2812 domain-containing protein	RP01	Chromosome	Chromosome	+	304511	305026	516	MULTISPECIES: DUF2812 domain-containing protein	-	PF11193	DUF2812	Protein of unknown function (DUF2812)	-	-	GO:0016021	integral component of membrane	-	-	-	-
gene0340	-	tryptophan RNA-binding attenuator protein inhibitory protein	RP01	Chromosome	Chromosome	+	305444	305605	162	tryptophan RNA-binding attenuator protein inhibitory protein	RecName: Full=Tryptophan RNA-binding attenuator protein inhibitory protein; AltName: Full=Anti-TRAP protein; Short=AT [Bacillus subtilis subsp. subtilis str. 168]	PF15777	Anti-TRAP	Tryptophan RNA-binding attenuator protein inhibitory protein	COG0484	DnaJ-class molecular chaperone with C-terminal Zn finger domain	-	-	-	-	-	-
gene0341	-	MULTISPECIES: DMT family transporter	RP01	Chromosome	Chromosome	+	305625	306569	945	MULTISPECIES: DMT family transporter	RecName: Full=Uncharacterized transporter YcbK [Bacillus subtilis subsp. subtilis str. 168]	PF00892;PF00892	EamA;EamA	EamA-like transporter family;EamA-like transporter family	COG0697	Permease of the drug/metabolite transporter (DMT) superfamily	GO:0016021;GO:0005886	integral component of membrane;;plasma membrane	-	-	-	-
gene0342	-	MULTISPECIES: SEC-C domain-containing protein	RP01	Chromosome	Chromosome	+	307109	308176	1068	MULTISPECIES: SEC-C domain-containing protein	RecName: Full=Uncharacterized protein YccF [Bacillus subtilis subsp. subtilis str. 168]	PF05225;PF02810	HTH_psq;SEC-C	helix-turn-helix, Psq domain;SEC-C motif	COG3318	Uncharacterized conserved protein YecA, UPF0149 family, contains C-terminal Zn-binding SEC-C motif	GO:0003677	DNA binding	K07039	uncharacterized protein	-	-
gene0343	nisF	MULTISPECIES: lantibiotic protection ABC transporter ATP-binding protein	RP01	Chromosome	Chromosome	+	308297	309013	717	MULTISPECIES: lantibiotic protection ABC transporter ATP-binding protein	RecName: Full=Lantibiotic transport ATP-binding protein SrtF [Streptococcus pyogenes] >lcl|P0C0E3.1 RecName: Full=Lantibiotic transport ATP-binding protein SrtF [Streptococcus pyogenes serotype M1]	PF00005;PF13304	ABC_tran;AAA_21	ABC transporter;AAA domain, putative AbiEii toxin, Type IV TA system	COG1131	ABC-type multidrug transport system, ATPase component	GO:0005524	ATP binding	K20490	lantibiotic transport system ATP-binding protein	-	-
gene0344	nisE	MULTISPECIES: lantibiotic immunity ABC transporter MutE/EpiE family permease subunit	RP01	Chromosome	Chromosome	+	309010	309768	759	MULTISPECIES: lantibiotic immunity ABC transporter MutE/EpiE family permease subunit	-	PF12730	ABC2_membrane_4	ABC-2 family transporter protein	COG4200	Predicted lantabiotic-exporting membrane pepmease, EfiE/EfiG/ABC2 family	GO:0016021	integral component of membrane	K20491	lantibiotic transport system permease protein	-	-
gene0345	nisG	MULTISPECIES: lantibiotic immunity ABC transporter MutG family permease subunit	RP01	Chromosome	Chromosome	+	309770	310540	771	MULTISPECIES: lantibiotic immunity ABC transporter MutG family permease subunit	-	PF12730	ABC2_membrane_4	ABC-2 family transporter protein	COG4200	Predicted lantabiotic-exporting membrane pepmease, EfiE/EfiG/ABC2 family	GO:0016021	integral component of membrane	K20492	lantibiotic transport system permease protein	-	-
gene0346	nisR	MULTISPECIES: response regulator transcription factor	RP01	Chromosome	Chromosome	+	310561	311223	663	MULTISPECIES: response regulator transcription factor	RecName: Full=Transcriptional regulatory protein SpaR; AltName: Full=Subtilin biosynthesis regulatory protein SpaR [Bacillus subtilis]	PF00072;PF00486	Response_reg;Trans_reg_C	Response regulator receiver domain;Transcriptional regulatory protein, C terminal	COG0745	DNA-binding response regulator, OmpR family, contains REC and winged-helix (wHTH) domain	GO:0006355;GO:0000160;GO:0005737;GO:0003677	regulation of transcription, DNA-templated;;phosphorelay signal transduction system;;cytoplasm;;DNA binding	K20488	two-component system, OmpR family, lantibiotic biosynthesis response regulator NisR/SpaR	-	-
gene0347	nisK	MULTISPECIES: sensor histidine kinase	RP01	Chromosome	Chromosome	+	311214	312584	1371	MULTISPECIES: sensor histidine kinase	RecName: Full=Sensor histidine kinase SpaK; AltName: Full=Subtilin biosynthesis sensor protein SpaK [Bacillus subtilis]	PF02518;PF00512;PF13589	HATPase_c;HisKA;HATPase_c_3	Histidine kinase-, DNA gyrase B-, and HSP90-like ATPase;His Kinase A (phospho-acceptor) domain;Histidine kinase-, DNA gyrase B-, and HSP90-like ATPase	COG0642	Signal transduction histidine kinase	GO:0016021;GO:0005524;GO:0000155	integral component of membrane;;ATP binding;;phosphorelay sensor kinase activity	K20487	two-component system, OmpR family, lantibiotic biosynthesis sensor histidine kinase NisK/SpaK [EC:2.7.13.3]	2.7.13.3	Transferases; Transferring phosphorus-containing groups; Protein-histidine kinases; ATP:protein-L-histidine N-phosphotransferase
gene0348	ytlI	MULTISPECIES: LysR family transcriptional regulator	RP01	Chromosome	Chromosome	-	313540	312641	900	MULTISPECIES: LysR family transcriptional regulator	RecName: Full=HTH-type transcriptional regulator YtlI [Bacillus subtilis subsp. subtilis str. 168]	PF03466;PF00126	LysR_substrate;HTH_1	LysR substrate binding domain;Bacterial regulatory helix-turn-helix protein, lysR family	COG0583	DNA-binding transcriptional regulator, LysR family	-	-	K21960	LysR family transcriptional regulator, regulator of the ytmI operon	-	-
gene0349	-	MULTISPECIES: tautomerase family protein	RP01	Chromosome	Chromosome	+	313650	314066	417	MULTISPECIES: tautomerase family protein	RecName: Full=Probable tautomerase YusQ [Bacillus subtilis subsp. subtilis str. 168]	PF14552;PF01361	Tautomerase_2;Tautomerase	Tautomerase enzyme;Tautomerase enzyme	COG1942	Phenylpyruvate tautomerase PptA, 4-oxalocrotonate tautomerase family	-	-	-	-	-	-
gene0350	fabG	MULTISPECIES: SDR family NAD(P)-dependent oxidoreductase	RP01	Chromosome	Chromosome	+	314050	314790	741	MULTISPECIES: SDR family NAD(P)-dependent oxidoreductase	PUTATIVE PSEUDOGENE: RecName: Full=Short-chain dehydrogenase/reductase homolog YusR [Bacillus subtilis subsp. subtilis str. 168]	PF00106;PF13561;PF08659	adh_short;adh_short_C2;KR	short chain dehydrogenase;Enoyl-(Acyl carrier protein) reductase;KR domain	COG1028	NAD(P)-dependent dehydrogenase, short-chain alcohol dehydrogenase family	GO:0016491	oxidoreductase activity	K00059	3-oxoacyl-[acyl-carrier protein] reductase [EC:1.1.1.100]	1.1.1.100	Oxidoreductases; Acting on the CH-OH group of donors; With NAD+ or NADP+ as acceptor; (3R)-3-hydroxyacyl-[acyl-carrier protein]:NADP+ oxidoreductase
gene0351	-	class I SAM-dependent methyltransferase	RP01	Chromosome	Chromosome	+	314878	316962	2085	class I SAM-dependent methyltransferase	-	PF08241;PF08242;PF13649;PF13847;PF13489;PF02353;PF02390	Methyltransf_11;Methyltransf_12;Methyltransf_25;Methyltransf_31;Methyltransf_23;CMAS;Methyltransf_4	Methyltransferase domain;Methyltransferase domain;Methyltransferase domain;Methyltransferase domain;Methyltransferase domain;Mycolic acid cyclopropane synthetase;Putative methyltransferase	COG2226	Ubiquinone/menaquinone biosynthesis C-methylase UbiE/MenG	-	-	-	-	-	-
gene0352	-	MULTISPECIES: DUF4352 domain-containing protein	RP01	Chromosome	Chromosome	-	318049	316973	1077	MULTISPECIES: DUF4352 domain-containing protein	RecName: Full=Uncharacterized lipoprotein YcdA; Flags: Precursor [Bacillus subtilis subsp. subtilis str. 168]	PF17118;PF11611	DUF5105;DUF4352	Domain of unknown function (DUF5105);Domain of unknown function (DUF4352)	-	-	-	-	-	-	-	-
gene0353	-	AbgT family transporter	RP01	Chromosome	Chromosome	-	320068	318668	1401	AbgT family transporter	RecName: Full=Uncharacterized protein YcgA [Bacillus subtilis subsp. subtilis str. 168]	PF03606;PF03806;PF03806;PF03553	DcuC;ABG_transport;ABG_transport;Na_H_antiporter	C4-dicarboxylate anaerobic carrier;AbgT putative transporter family;AbgT putative transporter family;Na+/H+ antiporter family	COG1288	Predicted membrane transporter YfcC, affects glyoxylate shunt	-	-	-	-	-	-
gene0354	-	M20 family metallopeptidase	RP01	Chromosome	Chromosome	+	320194	321363	1170	M20 family metallopeptidase	RecName: Full=Xaa-Arg dipeptidase; AltName: Full=Beta-Ala-Lys dipeptidase [Homo sapiens]	PF07687	M20_dimer	Peptidase dimerisation domain	COG1473	Metal-dependent amidase/aminoacylase/carboxypeptidase	GO:0016787	hydrolase activity	-	-	-	-
gene0355	ansA	MULTISPECIES: type II asparaginase	RP01	Chromosome	Chromosome	+	321537	322667	1131	MULTISPECIES: type II asparaginase	RecName: Full=L-asparaginase 2; Short=L-ASNase 2; AltName: Full=L-asparagine amidohydrolase 2; Flags: Precursor [Bacillus subtilis subsp. subtilis str. 168]	PF00710;PF17763	Asparaginase;Asparaginase_C	Asparaginase, N-terminal;Glutaminase/Asparaginase C-terminal domain	COG0252	L-asparaginase/archaeal Glu-tRNAGln amidotransferase subunit D	GO:0006528;GO:0004067	asparagine metabolic process;;asparaginase activity	K01424	L-asparaginase [EC:3.5.1.1]	3.5.1.1	Hydrolases; Acting on carbon-nitrogen bonds, other than peptide bonds; In linear amides; L-asparagine amidohydrolase
gene0356	-	MULTISPECIES: GNAT family N-acetyltransferase	RP01	Chromosome	Chromosome	-	323151	322699	453	MULTISPECIES: GNAT family N-acetyltransferase	RecName: Full=Uncharacterized N-acetyltransferase YvbK [Bacillus subtilis subsp. subtilis str. 168]	PF00583;PF13508;PF13673;PF13420;PF13480	Acetyltransf_1;Acetyltransf_7;Acetyltransf_10;Acetyltransf_4;Acetyltransf_6	Acetyltransferase (GNAT) family;Acetyltransferase (GNAT) domain;Acetyltransferase (GNAT) domain;Acetyltransferase (GNAT) domain;Acetyltransferase (GNAT) domain	COG0456	Ribosomal protein S18 acetylase RimI and related acetyltransferases	GO:0008080	N-acetyltransferase activity	-	-	-	-
gene0357	amiE	MULTISPECIES: amidase	RP01	Chromosome	Chromosome	+	323252	324751	1500	MULTISPECIES: amidase	RecName: Full=6-aminohexanoate-cyclic-dimer hydrolase; AltName: Full=Nylon oligomers-degrading enzyme EI [Paenarthrobacter ureafaciens]	PF01425	Amidase	Amidase	COG0154	Asp-tRNAAsn/Glu-tRNAGln amidotransferase A subunit or related amidase	GO:0004040;GO:0043864	amidase activity;;indoleacetamide hydrolase activity	K01426	amidase [EC:3.5.1.4]	3.5.1.4	Hydrolases; Acting on carbon-nitrogen bonds, other than peptide bonds; In linear amides; acylamide amidohydrolase
gene0358	-	MULTISPECIES: oligoendopeptidase F	RP01	Chromosome	Chromosome	-	326609	324774	1836	MULTISPECIES: oligoendopeptidase F	RecName: Full=Oligoendopeptidase F homolog [Bacillus subtilis subsp. subtilis str. 168]	PF01432;PF08439	Peptidase_M3;Peptidase_M3_N	Peptidase family M3;Oligopeptidase F	COG1164	Oligoendopeptidase F	-	-	-	-	-	-
gene0359	-	MULTISPECIES: GlsB/YeaQ/YmgE family stress response membrane protein	RP01	Chromosome	Chromosome	-	326990	326721	270	MULTISPECIES: GlsB/YeaQ/YmgE family stress response membrane protein	RecName: Full=UPF0410 protein YwzA [Bacillus subtilis subsp. subtilis str. 168]	PF04226	Transgly_assoc	Transglycosylase associated protein	COG2261	Uncharacterized membrane protein YeaQ/YmgE, transglycosylase-associated protein family	GO:0016021;GO:0005886	integral component of membrane;;plasma membrane	-	-	-	-
gene0360	-	MULTISPECIES: serine hydrolase	RP01	Chromosome	Chromosome	+	327161	328876	1716	MULTISPECIES: serine hydrolase	RecName: Full=Protein flp; AltName: Full=FmtA-like protein [Staphylococcus aureus subsp. aureus NCTC 8325] >lcl|Q9KJ74.1 RecName: Full=Protein flp; AltName: Full=FmtA-like protein [Staphylococcus aureus]	PF00144;PF11954	Beta-lactamase;DUF3471	Beta-lactamase;Domain of unknown function (DUF3471)	COG1680	CubicO group peptidase, beta-lactamase class C family	-	-	-	-	-	-
gene0361	glcF	MULTISPECIES: (Fe-S)-binding protein	RP01	Chromosome	Chromosome	-	330258	328936	1323	MULTISPECIES: (Fe-S)-binding protein	RecName: Full=Probable glycolate oxidase iron-sulfur subunit; AltName: Full=Glycolate dehydrogenase subunit GlcF [Bacillus subtilis subsp. subtilis str. 168]	PF02754;PF02754;PF13183;PF13534;PF12838;PF13237;PF12800;PF12800	CCG;CCG;Fer4_8;Fer4_17;Fer4_7;Fer4_10;Fer4_4;Fer4_4	Cysteine-rich domain;Cysteine-rich domain;4Fe-4S dicluster domain;4Fe-4S dicluster domain;4Fe-4S dicluster domain;4Fe-4S dicluster domain;4Fe-4S binding domain;4Fe-4S binding domain	COG0247	Fe-S cluster-containing oxidoreductase, includes glycolate oxidase subunit GlcF	-	-	K11473	glycolate oxidase iron-sulfur subunit	-	-
gene0362	glcD	MULTISPECIES: glycolate oxidase subunit GlcD	RP01	Chromosome	Chromosome	-	331667	330255	1413	MULTISPECIES: glycolate oxidase subunit GlcD	RecName: Full=Glycolate oxidase subunit GlcD; AltName: Full=Glycolate dehydrogenase subunit GlcD [Bacillus subtilis subsp. subtilis str. 168]	PF02913;PF01565	FAD-oxidase_C;FAD_binding_4	FAD linked oxidases, C-terminal domain;FAD binding domain	COG0277	FAD/FMN-containing lactate dehydrogenase/glycolate oxidase	-	-	K00104	glycolate oxidase [EC:1.1.3.15]	1.1.3.15	Oxidoreductases; Acting on the CH-OH group of donors; With oxygen as acceptor; (S)-2-hydroxy carboxylate:oxygen 2-oxidoreductase
gene0363	celA	MULTISPECIES: PTS sugar transporter subunit IIB	RP01	Chromosome	Chromosome	-	332091	331789	303	MULTISPECIES: PTS sugar transporter subunit IIB	RecName: Full=PTS system cellobiose-specific EIIB component; AltName: Full=Cellobiose-specific phosphotransferase enzyme IIB component; AltName: Full=EIIB-Cel [Geobacillus stearothermophilus]	PF02302	PTS_IIB	PTS system, Lactose/Cellobiose specific IIB subunit	COG1440	Phosphotransferase system cellobiose-specific component IIB	GO:0009401;GO:0016301;GO:0008982	phosphoenolpyruvate-dependent sugar phosphotransferase system;;kinase activity;;protein-N(PI)-phosphohistidine-sugar phosphotransferase activity	K02760	cellobiose PTS system EIIB component [EC:2.7.1.196 2.7.1.205]	2.7.1.205;2.7.1.196	Transferases; Transferring phosphorus-containing groups; Phosphotransferases with an alcohol group as acceptor; protein-Npi-phospho-L-histidine:cellobiose Npi-phosphotransferase|Transferases; Transferring phosphorus-containing groups; Phosphotransferases with an alcohol group as acceptor; protein-Npi-phospho-L-histidine:N,N'-diacetylchitobiose Npi-phosphotransferase
gene0364	celC	MULTISPECIES: PTS lactose/cellobiose transporter subunit IIA	RP01	Chromosome	Chromosome	-	332420	332088	333	MULTISPECIES: PTS lactose/cellobiose transporter subunit IIA	RecName: Full=Lichenan-specific phosphotransferase enzyme IIA component; AltName: Full=EIIA-Lic; AltName: Full=EIII-Lic; AltName: Full=PTS system lichenan-specific EIIA component [Bacillus subtilis subsp. subtilis str. 168]	PF02255	PTS_IIA	PTS system, Lactose/Cellobiose specific IIA subunit	COG1447	Phosphotransferase system cellobiose-specific component IIA	GO:0009401;GO:0046872;GO:0016740	phosphoenolpyruvate-dependent sugar phosphotransferase system;;metal ion binding;;transferase activity	K02759	cellobiose PTS system EIIA component [EC:2.7.1.196 2.7.1.205]	2.7.1.205;2.7.1.196	Transferases; Transferring phosphorus-containing groups; Phosphotransferases with an alcohol group as acceptor; protein-Npi-phospho-L-histidine:cellobiose Npi-phosphotransferase|Transferases; Transferring phosphorus-containing groups; Phosphotransferases with an alcohol group as acceptor; protein-Npi-phospho-L-histidine:N,N'-diacetylchitobiose Npi-phosphotransferase
gene0365	celB	MULTISPECIES: PTS cellobiose transporter subunit IIC	RP01	Chromosome	Chromosome	-	333723	332437	1287	MULTISPECIES: PTS cellobiose transporter subunit IIC	RecName: Full=Putative permease IIC component YwbA; AltName: Full=Putative PTS system EIIC component [Bacillus subtilis subsp. subtilis str. 168]	PF02378	PTS_EIIC	Phosphotransferase system, EIIC	COG1455	Phosphotransferase system cellobiose-specific component IIC	GO:0009401;GO:0016021;GO:0005886;GO:0008982	phosphoenolpyruvate-dependent sugar phosphotransferase system;;integral component of membrane;;plasma membrane;;protein-N(PI)-phosphohistidine-sugar phosphotransferase activity	K02761	cellobiose PTS system EIIC component	-	-
gene0366	celF	6-phospho-beta-glucosidase	RP01	Chromosome	Chromosome	-	335044	333710	1335	6-phospho-beta-glucosidase	RecName: Full=Probable 6-phospho-beta-glucosidase [Bacillus subtilis subsp. subtilis str. 168]	PF02056;PF11975	Glyco_hydro_4;Glyco_hydro_4C	Family 4 glycosyl hydrolase;Family 4 glycosyl hydrolase C-terminal domain	COG1486	Alpha-galactosidase/6-phospho-beta-glucosidase, family 4 of glycosyl hydrolase	-	-	K01222	6-phospho-beta-glucosidase [EC:3.2.1.86]	3.2.1.86	Hydrolases; Glycosylases; Glycosidases, i.e. enzymes that hydrolyse O- and S-glycosyl compounds; 6-phospho-beta-D-glucosyl-(1->4)-D-glucose glucohydrolase
gene0367	gamR	MULTISPECIES: GntR family transcriptional regulator	RP01	Chromosome	Chromosome	+	335207	335941	735	MULTISPECIES: GntR family transcriptional regulator	RecName: Full=HTH-type transcriptional repressor GamR [Bacillus subtilis subsp. subtilis str. 168]	PF07702;PF00392	UTRA;GntR	UTRA domain;Bacterial regulatory proteins, gntR family	COG2188	DNA-binding transcriptional regulator, GntR family	GO:0003677;GO:0003700	DNA binding;;DNA-binding transcription factor activity	K24966	GntR family transcriptional regulator, amino sugar utilization regulator	-	-
gene0368	chbG	MULTISPECIES: chitin disaccharide deacetylase	RP01	Chromosome	Chromosome	+	335938	336672	735	MULTISPECIES: chitin disaccharide deacetylase	RecName: Full=Carbohydrate deacetylase [Clostridium beijerinckii NCIMB 8052]	PF04794	YdjC	YdjC-like protein	COG3394	Chitooligosaccharide deacetylase ChbG, YdjC/CelG family	GO:0000272;GO:0046872;GO:0016811	polysaccharide catabolic process;;metal ion binding;;hydrolase activity, acting on carbon-nitrogen (but not peptide) bonds, in linear amides	K03478	chitin disaccharide deacetylase [EC:3.5.1.105]	3.5.1.105	Hydrolases; Acting on carbon-nitrogen bonds, other than peptide bonds; In linear amides; N,N'-diacetylchitobiose acetylhydrolase
gene0369	-	MULTISPECIES: fibronectin type III domain-containing protein	RP01	Chromosome	Chromosome	+	337082	338869	1788	MULTISPECIES: fibronectin type III domain-containing protein	RecName: Full=Chitinase A1; Flags: Precursor [Niallia circulans]	PF00704;PF00041;PF02839	Glyco_hydro_18;fn3;CBM_5_12	Glycosyl hydrolases family 18;Fibronectin type III domain;Carbohydrate binding domain	COG3325	Chitinase, GH18 family	-	-	K01183	chitinase [EC:3.2.1.14]	3.2.1.14	Hydrolases; Glycosylases; Glycosidases, i.e. enzymes that hydrolyse O- and S-glycosyl compounds; (1->4)-2-acetamido-2-deoxy-beta-D-glucan glycanohydrolase
gene0370	-	chitinase C-terminal domain-containing protein	RP01	Chromosome	Chromosome	+	338960	341041	2082	chitinase C-terminal domain-containing protein	RecName: Full=Chitodextrinase; AltName: Full=Endo-chitodextinase; Flags: Precursor [Vibrio furnissii]	PF00704;PF06483	Glyco_hydro_18;ChiC	Glycosyl hydrolases family 18;Chitinase C	COG3325	Chitinase, GH18 family	-	-	K01183	chitinase [EC:3.2.1.14]	3.2.1.14	Hydrolases; Glycosylases; Glycosidases, i.e. enzymes that hydrolyse O- and S-glycosyl compounds; (1->4)-2-acetamido-2-deoxy-beta-D-glucan glycanohydrolase
gene0371	sspA	MULTISPECIES: serine protease	RP01	Chromosome	Chromosome	-	342050	341100	951	MULTISPECIES: serine protease	RecName: Full=Glutamyl endopeptidase; AltName: Full=Glutamate-specific endopeptidase; Short=GSE; Flags: Precursor [Bacillus licheniformis DSM 13 = ATCC 14580]	PF00089;PF13365	Trypsin;Trypsin_2	Trypsin;Trypsin-like peptidase domain	COG3591	V8-like Glu-specific endopeptidase	GO:0004252	serine-type endopeptidase activity	K01318	glutamyl endopeptidase [EC:3.4.21.19]	3.4.21.19	Hydrolases; Acting on peptide bonds (peptidases); Serine endopeptidases; glutamyl endopeptidase
gene0372	gdh	MULTISPECIES: glucose 1-dehydrogenase	RP01	Chromosome	Chromosome	+	342222	342995	774	MULTISPECIES: glucose 1-dehydrogenase	RecName: Full=Glucose 1-dehydrogenase 2; AltName: Full=GLCDH-II; Short=GDH-II; AltName: Full=General stress protein 74; Short=GSP74 [Bacillus subtilis subsp. subtilis str. 168]	PF13561;PF00106;PF08659	adh_short_C2;adh_short;KR	Enoyl-(Acyl carrier protein) reductase;short chain dehydrogenase;KR domain	COG1028	NAD(P)-dependent dehydrogenase, short-chain alcohol dehydrogenase family	GO:0047936	glucose 1-dehydrogenase [NAD(P)] activity	K00034	glucose 1-dehydrogenase [EC:1.1.1.47]	1.1.1.47	Oxidoreductases; Acting on the CH-OH group of donors; With NAD+ or NADP+ as acceptor; D-glucose:NAD(P)+ 1-oxidoreductase
gene0373	-	DUF1835 domain-containing protein	RP01	Chromosome	Chromosome	+	343153	343983	831	DUF1835 domain-containing protein	-	PF12395;PF08874	DUF3658;DUF1835	Protein of unknown function;Domain of unknown function (DUF1835)	-	-	-	-	-	-	-	-
gene0374	-	MULTISPECIES: DUF4901 domain-containing protein	RP01	Chromosome	Chromosome	+	344070	345467	1398	MULTISPECIES: DUF4901 domain-containing protein	RecName: Full=Uncharacterized protein YcdC [Bacillus subtilis subsp. subtilis str. 168]	PF16244	DUF4901	Domain of unknown function (DUF4901)	-	-	-	-	-	-	-	-
gene0375	sseA	MULTISPECIES: sulfurtransferase	RP01	Chromosome	Chromosome	-	346372	345521	852	MULTISPECIES: sulfurtransferase	RecName: Full=Probable 3-mercaptopyruvate sulfurtransferase; Short=MST; AltName: Full=Rhodanese-like protein [Pseudomonas aeruginosa PAO1]	PF00581;PF00581	Rhodanese;Rhodanese	Rhodanese-like domain;Rhodanese-like domain	COG2897	3-mercaptopyruvate sulfurtransferase SseA, contains two rhodanese domains	-	-	K01011	thiosulfate/3-mercaptopyruvate sulfurtransferase [EC:2.8.1.1 2.8.1.2]	2.8.1.1;2.8.1.2	Transferases; Transferring sulfur-containing groups; Sulfurtransferases; thiosulfate:cyanide sulfurtransferase|Transferases; Transferring sulfur-containing groups; Sulfurtransferases; 2-oxo-3-sulfanylpropanoate:sulfide sulfurtransferase
gene0376	cwlJ	MULTISPECIES: cell wall hydrolase	RP01	Chromosome	Chromosome	+	346527	346955	429	MULTISPECIES: cell wall hydrolase	RecName: Full=Cell wall hydrolase CwlJ [Bacillus subtilis subsp. subtilis str. 168]	PF07486	Hydrolase_2	Cell Wall Hydrolase	COG3773	Cell wall hydrolase CwlJ, involved in spore germination	GO:0016787	hydrolase activity	K01449	N-acetylmuramoyl-L-alanine amidase [EC:3.5.1.28]	3.5.1.28	Hydrolases; Acting on carbon-nitrogen bonds, other than peptide bonds; In linear amides; peptidoglycan amidohydrolase
gene0377	-	hypothetical protein	RP01	Chromosome	Chromosome	-	347994	347002	993	hypothetical protein	RecName: Full=Uncharacterized protein YceB [Bacillus subtilis subsp. subtilis str. 168]	PF00296	Bac_luciferase	Luciferase-like monooxygenase	COG2141	Flavin-dependent oxidoreductase, luciferase family (includes alkanesulfonate monooxygenase SsuD and methylene tetrahydromethanopterin reductase)	-	-	-	-	-	-
gene0378	cwlO	MULTISPECIES: C40 family peptidase	RP01	Chromosome	Chromosome	+	348292	349638	1347	MULTISPECIES: C40 family peptidase	RecName: Full=Peptidoglycan DL-endopeptidase CwlO; AltName: Full=D-gamma-glutamyl-meso-diaminopimelyl DL-endopeptidase; Flags: Precursor [Bacillus licheniformis DSM 13 = ATCC 14580]	PF00877	NLPC_P60	NlpC/P60 family	COG0791	Cell wall-associated hydrolase, NlpC_P60 family	-	-	K21471	peptidoglycan DL-endopeptidase CwlO [EC:3.4.-.-]	-	-
gene0379	berB	MULTISPECIES: ABC transporter permease subunit	RP01	Chromosome	Chromosome	-	350502	349690	813	MULTISPECIES: ABC transporter permease subunit	-	PF12679;PF01061	ABC2_membrane_2;ABC2_membrane	ABC-2 family transporter protein;ABC-2 type transporter	-	-	-	-	K25147	beta-exotoxin I transport system permease protein	-	-
gene0380	berA	MULTISPECIES: ABC transporter ATP-binding protein	RP01	Chromosome	Chromosome	-	351386	350499	888	MULTISPECIES: ABC transporter ATP-binding protein	RecName: Full=Multidrug efflux system ATP-binding protein Rv1218c [Mycobacterium tuberculosis H37Rv]	PF00005;PF13304	ABC_tran;AAA_21	ABC transporter;AAA domain, putative AbiEii toxin, Type IV TA system	COG1131	ABC-type multidrug transport system, ATPase component	GO:0005524;GO:0042626	ATP binding;;ATPase-coupled transmembrane transporter activity	K25148	beta-exotoxin I transport system ATP-binding protein	-	-
gene0381	-	MULTISPECIES: TetR/AcrR family transcriptional regulator	RP01	Chromosome	Chromosome	+	351535	352122	588	MULTISPECIES: TetR/AcrR family transcriptional regulator	-	PF00440	TetR_N	Bacterial regulatory proteins, tetR family	COG1309	DNA-binding protein, AcrR family, includes nucleoid occlusion protein SlmA	GO:0003677	DNA binding	-	-	-	-
gene0382	-	MULTISPECIES: DUF2207 domain-containing protein	RP01	Chromosome	Chromosome	+	352236	354131	1896	MULTISPECIES: DUF2207 domain-containing protein	-	PF09972	DUF2207	Predicted membrane protein (DUF2207)	COG4907	Uncharacterized membrane protein	-	-	-	-	-	-
gene0383	-	MULTISPECIES: DUF4188 domain-containing protein	RP01	Chromosome	Chromosome	-	354661	354176	486	MULTISPECIES: DUF4188 domain-containing protein	-	PF13826	DUF4188	Domain of unknown function (DUF4188)	-	-	-	-	-	-	-	-
gene0384	-	MULTISPECIES: PadR family transcriptional regulator	RP01	Chromosome	Chromosome	-	355217	354654	564	MULTISPECIES: PadR family transcriptional regulator	RecName: Full=Negative transcription regulator PadR [Bacillus subtilis subsp. subtilis str. 168]	PF10400;PF03551	Vir_act_alpha_C;PadR	Virulence activator alpha C-term;Transcriptional regulator PadR-like family	COG1695	DNA-binding transcriptional regulator, PadR family	-	-	-	-	-	-
gene0385	-	MULTISPECIES: TerD family protein	RP01	Chromosome	Chromosome	+	355533	356135	603	MULTISPECIES: TerD family protein	RecName: Full=Stress response protein SCP2 [Bacillus subtilis subsp. subtilis str. 168]	PF02342	TerD	TerD domain	COG2310	Stress response protein SCP2	-	-	-	-	-	-
gene0386	terD	MULTISPECIES: TerD family protein	RP01	Chromosome	Chromosome	+	356163	356744	582	MULTISPECIES: TerD family protein	RecName: Full=General stress protein 16U; Short=GSP16U [Bacillus subtilis subsp. subtilis str. 168]	PF02342	TerD	TerD domain	COG2310	Stress response protein SCP2	-	-	K05795	tellurium resistance protein TerD	-	-
gene0387	terD	MULTISPECIES: TerD family protein	RP01	Chromosome	Chromosome	+	356824	357402	579	MULTISPECIES: TerD family protein	RecName: Full=Uncharacterized protein YceE [Bacillus subtilis subsp. subtilis str. 168]	PF02342	TerD	TerD domain	COG2310	Stress response protein SCP2	-	-	K05795	tellurium resistance protein TerD	-	-
gene0388	-	MULTISPECIES: TerC family protein	RP01	Chromosome	Chromosome	+	357468	358241	774	MULTISPECIES: TerC family protein	RecName: Full=Uncharacterized membrane protein YceF [Bacillus subtilis subsp. subtilis str. 168]	PF03741;PF04332	TerC;DUF475	Integral membrane protein TerC family;Protein of unknown function (DUF475)	COG0861	Tellurite resistance membrane protein TerC	GO:0016021	integral component of membrane	-	-	-	-
gene0389	-	MULTISPECIES: HpcH/HpaI aldolase/citrate lyase family protein	RP01	Chromosome	Chromosome	+	358334	359515	1182	MULTISPECIES: HpcH/HpaI aldolase/citrate lyase family protein	-	PF15617	C-C_Bond_Lyase	C-C_Bond_Lyase of the TIM-Barrel fold	COG2301	Citrate lyase beta subunit	GO:0016829	lyase activity	-	-	-	-
gene0390	-	MULTISPECIES: hypothetical protein	RP01	Chromosome	Chromosome	+	359665	359886	222	MULTISPECIES: hypothetical protein	-	PF20038	HTH_59	Helix-turn-helix domain	-	-	-	-	-	-	-	-
gene0391	-	MULTISPECIES: YceG family protein	RP01	Chromosome	Chromosome	+	359892	361496	1605	MULTISPECIES: YceG family protein	RecName: Full=Uncharacterized protein YceG [Bacillus subtilis subsp. subtilis str. 168]	PF14266	YceG_bac	Putative component of 'biosynthetic module'	-	-	-	-	-	-	-	-
gene0392	-	MULTISPECIES: toxic anion resistance protein	RP01	Chromosome	Chromosome	+	361513	362607	1095	MULTISPECIES: toxic anion resistance protein	RecName: Full=Uncharacterized protein YceH [Bacillus subtilis subsp. subtilis str. 168]	PF05816	TelA	Toxic anion resistance protein (TelA)	COG3853	Uncharacterized conserved protein YaaN involved in tellurite resistance	-	-	-	-	-	-
gene0393	ccdA	MULTISPECIES: cytochrome C biogenesis protein CcdA	RP01	Chromosome	Chromosome	+	362759	363460	702	MULTISPECIES: cytochrome C biogenesis protein CcdA	RecName: Full=Cytochrome c-type biogenesis protein CcdA [Bacillus subtilis subsp. subtilis str. 168]	PF02683	DsbD	Cytochrome C biogenesis protein transmembrane region	COG0785	Cytochrome c biogenesis protein CcdA	GO:0017004;GO:0016021	cytochrome complex assembly;;integral component of membrane	K06196	cytochrome c-type biogenesis protein	-	-
gene0394	-	hypothetical protein	RP01	Chromosome	Chromosome	+	363525	363695	171	hypothetical protein	-	-	-	-	COG0789	DNA-binding transcriptional regulator, MerR family	-	-	-	-	-	-
gene0395	narK	MULTISPECIES: NarK/NasA family nitrate transporter	RP01	Chromosome	Chromosome	-	364989	363784	1206	MULTISPECIES: NarK/NasA family nitrate transporter	RecName: Full=Nitrate transporter [Bacillus subtilis subsp. subtilis str. 168]	PF07690	MFS_1	Major Facilitator Superfamily	COG2223	Nitrate/nitrite transporter NarK	GO:0016021;GO:0005886;GO:0022857	integral component of membrane;;plasma membrane;;transmembrane transporter activity	K02575	MFS transporter, NNP family, nitrate/nitrite transporter	-	-
gene0396	ldh	MULTISPECIES: L-lactate dehydrogenase	RP01	Chromosome	Chromosome	+	365440	366399	960	MULTISPECIES: L-lactate dehydrogenase	RecName: Full=L-lactate dehydrogenase; Short=L-LDH [Bacillus licheniformis DSM 13 = ATCC 14580]	PF00056;PF02866	Ldh_1_N;Ldh_1_C	lactate/malate dehydrogenase, NAD binding domain;lactate/malate dehydrogenase, alpha/beta C-terminal domain	COG0039	Malate/lactate dehydrogenase	GO:0006096;GO:0005737;GO:0004459	glycolytic process;;cytoplasm;;L-lactate dehydrogenase activity	K00016	L-lactate dehydrogenase [EC:1.1.1.27]	1.1.1.27	Oxidoreductases; Acting on the CH-OH group of donors; With NAD+ or NADP+ as acceptor; (S)-lactate:NAD+ oxidoreductase
gene0397	lctP	MULTISPECIES: L-lactate permease	RP01	Chromosome	Chromosome	+	366449	368071	1623	MULTISPECIES: L-lactate permease	RecName: Full=L-lactate permease [Bacillus subtilis subsp. subtilis str. 168]	PF02652	Lactate_perm	L-lactate permease	COG1620	L-lactate permease	GO:0005887;GO:0015129	integral component of plasma membrane;;lactate transmembrane transporter activity	K03303	lactate permease	-	-
gene0398	-	MULTISPECIES: LysE family translocator	RP01	Chromosome	Chromosome	+	368178	368819	642	MULTISPECIES: LysE family translocator	RecName: Full=Putative amino acid efflux protein YcgF [Bacillus subtilis subsp. subtilis str. 168]	PF01810	LysE	LysE type translocator	COG1280	Threonine/homoserine/homoserine lactone efflux protein	-	-	-	-	-	-
gene0399	-	MULTISPECIES: amino acid permease	RP01	Chromosome	Chromosome	-	370154	368820	1335	MULTISPECIES: amino acid permease	RecName: Full=Uncharacterized transporter YcgH [Bacillus subtilis subsp. subtilis str. 168]	PF00324;PF13520;PF03845	AA_permease;AA_permease_2;Spore_permease	Amino acid permease;Amino acid permease;Spore germination protein	COG1113	L-asparagine transporter or related permease	GO:0055085;GO:0016021	transmembrane transport;;integral component of membrane	K03293	amino acid transporter, AAT family	-	-
gene0400	nadE	MULTISPECIES: ammonia-dependent NAD(+) synthetase	RP01	Chromosome	Chromosome	+	370331	371149	819	MULTISPECIES: ammonia-dependent NAD(+) synthetase	RecName: Full=NH(3)-dependent NAD(+) synthetase [Bacillus licheniformis DSM 13 = ATCC 14580]	PF02540	NAD_synthase	NAD synthase	COG0171	NH3-dependent NAD+ synthetase	GO:0009435;GO:0005737;GO:0005524;GO:0046872;GO:0004359;GO:0008795;GO:0003952	NAD biosynthetic process;;cytoplasm;;ATP binding;;metal ion binding;;glutaminase activity;;NAD+ synthase activity;;NAD+ synthase (glutamine-hydrolyzing) activity	K01916	NAD+ synthase [EC:6.3.1.5]	6.3.1.5	Ligases; Forming carbon-nitrogen bonds; Acid-D-ammonia (or amine) ligases (amide synthases); deamido-NAD+:ammonia ligase (AMP-forming)
gene0401	aroK	MULTISPECIES: shikimate kinase	RP01	Chromosome	Chromosome	+	371271	371798	528	MULTISPECIES: shikimate kinase	RecName: Full=Shikimate kinase; Short=SK [Bacillus licheniformis DSM 13 = ATCC 14580]	PF01202	SKI	Shikimate kinase	COG0703	Shikimate kinase	GO:0008652;GO:0009073;GO:0009423;GO:0005737;GO:0005524;GO:0000287;GO:0004765	cellular amino acid biosynthetic process;;aromatic amino acid family biosynthetic process;;chorismate biosynthetic process;;cytoplasm;;ATP binding;;magnesium ion binding;;shikimate kinase activity	K00891	shikimate kinase [EC:2.7.1.71]	2.7.1.71	Transferases; Transferring phosphorus-containing groups; Phosphotransferases with an alcohol group as acceptor; ATP:shikimate 3-phosphotransferase
gene0402	-	MULTISPECIES: nucleotidyltransferase domain-containing protein	RP01	Chromosome	Chromosome	+	372060	372830	771	MULTISPECIES: nucleotidyltransferase domain-containing protein	RecName: Full=Uncharacterized protein YcgL [Bacillus subtilis subsp. subtilis str. 168]	PF10127	RlaP	RNA repair pathway DNA polymerase beta family	COG3541	Predicted nucleotidyltransferase YcgL	-	-	K07074	uncharacterized protein	-	-
gene0403	fadM	proline dehydrogenase	RP01	Chromosome	Chromosome	+	373195	374112	918	proline dehydrogenase	RecName: Full=Proline dehydrogenase 2; Short=PRODH 2; AltName: Full=Proline oxidase 2 [Bacillus subtilis subsp. subtilis str. 168]	PF01619	Pro_dh	Proline dehydrogenase	COG0506	Proline dehydrogenase	-	-	K00318	proline dehydrogenase [EC:1.5.5.2]	1.5.5.2	Oxidoreductases; Acting on the CH-NH group of donors; With a quinone or similar compound as acceptor; L-proline:quinone oxidoreductase
gene0404	-	MULTISPECIES: L-glutamate gamma-semialdehyde dehydrogenase	RP01	Chromosome	Chromosome	+	374136	375686	1551	MULTISPECIES: L-glutamate gamma-semialdehyde dehydrogenase	RecName: Full=1-pyrroline-5-carboxylate dehydrogenase; Short=P5C dehydrogenase; AltName: Full=L-glutamate gamma-semialdehyde dehydrogenase [Bacillus licheniformis DSM 13 = ATCC 14580]	PF00171	Aldedh	Aldehyde dehydrogenase family	COG1012	Acyl-CoA reductase or other NAD-dependent aldehyde dehydrogenase	-	-	K00294	1-pyrroline-5-carboxylate dehydrogenase [EC:1.2.1.88]	1.2.1.88	Oxidoreductases; Acting on the aldehyde or oxo group of donors; With NAD+ or NADP+ as acceptor; L-glutamate gamma-semialdehyde:NAD+ oxidoreductase
gene0405	putP	MULTISPECIES: sodium/proline symporter PutP	RP01	Chromosome	Chromosome	+	375841	377271	1431	MULTISPECIES: sodium/proline symporter PutP	RecName: Full=High-affinity proline transporter PutP [Bacillus subtilis subsp. subtilis str. 168]	PF00474	SSF	Sodium:solute symporter family	COG0591	Na+/proline symporter	-	-	K11928	sodium/proline symporter	-	-
gene0406	putR	MULTISPECIES: PucR family transcriptional regulator	RP01	Chromosome	Chromosome	+	377427	378671	1245	MULTISPECIES: PucR family transcriptional regulator	RecName: Full=Proline-responsive transcriptional activator PutR; AltName: Full=Proline catabolism regulator [Bacillus subtilis subsp. subtilis str. 168]	PF13556;PF17853	HTH_30;GGDEF_2	PucR C-terminal helix-turn-helix domain;GGDEF-like domain	COG2508	DNA-binding transcriptional regulator, PucR/PutR family	-	-	K23253	PucR family transcriptional regulator, proline-responsive transcriptional activator	-	-
gene0407	ycgQ	TIGR03943 family protein	RP01	Chromosome	Chromosome	-	379554	378709	846	TIGR03943 family protein	RecName: Full=UPF0703 protein YcgQ [Bacillus subtilis subsp. subtilis str. 168]	PF09323	DUF1980	Domain of unknown function (DUF1980)	COG3689	Uncharacterized membrane protein YcgQ, UPF0703/DUF1980 family	GO:0016021	integral component of membrane	K08986	putative membrane protein	-	-
gene0408	-	putative two-component membrane permease complex subunit SMU_747c	RP01	Chromosome	Chromosome	-	380446	379559	888	putative two-component membrane permease complex subunit SMU_747c	RecName: Full=UPF0718 protein YcgR [Bacillus subtilis subsp. subtilis str. 168]	PF03773	ArsP_1	Predicted permease	COG0701	Uncharacterized membrane protein YraQ, UPF0718 family	GO:0016021;GO:0005886	integral component of membrane;;plasma membrane	K07089	uncharacterized protein	-	-
gene0409	-	hypothetical protein	RP01	Chromosome	Chromosome	+	380538	380666	129	hypothetical protein	-	-	-	-	-	-	-	-	-	-	-	-
gene0410	cah	MULTISPECIES: acetylxylan esterase	RP01	Chromosome	Chromosome	+	380650	381606	957	MULTISPECIES: acetylxylan esterase	RecName: Full=Cephalosporin-C deacetylase; AltName: Full=Acetylxylan esterase [Bacillus subtilis subsp. subtilis str. 168]	PF05448;PF00326;PF01738;PF03959	AXE1;Peptidase_S9;DLH;FSH1	Acetyl xylan esterase (AXE1);Prolyl oligopeptidase family;Dienelactone hydrolase family;Serine hydrolase (FSH1)	COG3458	Cephalosporin-C deacetylase or related acetyl esterase	-	-	K01060	cephalosporin-C deacetylase [EC:3.1.1.41]	3.1.1.41	Hydrolases; Acting on ester bonds; Carboxylic-ester hydrolases; cephalosporin-C acetylhydrolase
gene0411	-	putative transcriptional regulator YdgG	RP01	Chromosome	Chromosome	+	381699	382121	423	putative transcriptional regulator YdgG	-	PF13463;PF12802;PF01047;PF13412;PF01325	HTH_27;MarR_2;MarR;HTH_24;Fe_dep_repress	Winged helix DNA-binding domain;MarR family;MarR family;Winged helix-turn-helix DNA-binding;Iron dependent repressor, N-terminal DNA binding domain	COG1846	DNA-binding transcriptional regulator, MarR family	-	-	-	-	-	-
gene0412	-	MULTISPECIES: DUF3147 family protein	RP01	Chromosome	Chromosome	+	382112	382453	342	MULTISPECIES: DUF3147 family protein	-	-	-	-	-	-	GO:0016021	integral component of membrane	-	-	-	-
gene0413	tcyB	MULTISPECIES: amino acid ABC transporter permease	RP01	Chromosome	Chromosome	-	384082	383399	684	MULTISPECIES: amino acid ABC transporter permease	RecName: Full=Probable amino-acid ABC transporter permease protein YckA [Bacillus subtilis subsp. subtilis str. 168]	PF00528	BPD_transp_1	Binding-protein-dependent transport system inner membrane component	COG0765	ABC-type amino acid transport system, permease component	GO:0006865;GO:0043190;GO:0022857	amino acid transport;;ATP-binding cassette (ABC) transporter complex;;transmembrane transporter activity	K10009	L-cystine transport system permease protein	-	-
gene0414	fliY	MULTISPECIES: transporter substrate-binding domain-containing protein	RP01	Chromosome	Chromosome	-	384969	384094	876	MULTISPECIES: transporter substrate-binding domain-containing protein	RecName: Full=Probable ABC transporter extracellular-binding protein YckB; AltName: Full=ORF2; Flags: Precursor [Bacillus subtilis subsp. subtilis str. 168]	PF00497	SBP_bac_3	Bacterial extracellular solute-binding proteins, family 3	COG0834	ABC-type amino acid transport/signal transduction system, periplasmic component/domain	GO:0005886	plasma membrane	K02424	L-cystine transport system substrate-binding protein	-	-
gene0415	mdaB	MULTISPECIES: NAD(P)H-dependent oxidoreductase	RP01	Chromosome	Chromosome	+	385153	385704	552	MULTISPECIES: NAD(P)H-dependent oxidoreductase	RecName: Full=NADPH:quinone oxidoreductase MdaB; AltName: Full=Modulator of drug activity B [Haemophilus influenzae Rd KW20]	PF02525;PF03358	Flavodoxin_2;FMN_red	Flavodoxin-like fold;NADPH-dependent FMN reductase	COG2249	Putative NADPH-quinone reductase (modulator of drug activity B)	-	-	K03923	NADPH dehydrogenase (quinone) [EC:1.6.5.10]	1.6.5.10	Oxidoreductases; Acting on NADH or NADPH; With a quinone or similar compound as acceptor; NADPH:(quinone-acceptor) oxidoreductase
gene0416	-	MULTISPECIES: AAA family ATPase	RP01	Chromosome	Chromosome	+	385800	386525	726	MULTISPECIES: AAA family ATPase	-	PF13304;PF13476	AAA_21;AAA_23	AAA domain, putative AbiEii toxin, Type IV TA system;AAA domain	COG3910	Predicted ATPase	GO:0005524;GO:0016887	ATP binding;;ATP hydrolysis activity	-	-	-	-
gene0417	bglA	Beta-glucosidase 6-phospho-beta-glucosidase	RP01	Chromosome	Chromosome	+	386595	388031	1437	Beta-glucosidase 6-phospho-beta-glucosidase	RecName: Full=Aryl-phospho-beta-D-glucosidase BglC; AltName: Full=6-phospho-beta-glucosidase [Bacillus subtilis subsp. subtilis str. 168]	PF00232	Glyco_hydro_1	Glycosyl hydrolase family 1	COG2723	Beta-glucosidase/6-phospho-beta-glucosidase/beta-galactosidase	-	-	K01223	6-phospho-beta-glucosidase [EC:3.2.1.86]	3.2.1.86	Hydrolases; Glycosylases; Glycosidases, i.e. enzymes that hydrolyse O- and S-glycosyl compounds; 6-phospho-beta-D-glucosyl-(1->4)-D-glucose glucohydrolase
gene0418	-	MULTISPECIES: competence protein ComJ	RP01	Chromosome	Chromosome	-	388469	388071	399	MULTISPECIES: competence protein ComJ	RecName: Full=DNA-entry nuclease inhibitor; AltName: Full=Competence protein J [Bacillus subtilis subsp. subtilis str. 168]	PF11033	ComJ	Competence protein J (ComJ)	-	-	-	-	-	-	-	-
gene0419	-	MULTISPECIES: endonuclease NucA	RP01	Chromosome	Chromosome	-	388933	388487	447	MULTISPECIES: endonuclease NucA	RecName: Full=DNA-entry nuclease; AltName: Full=Competence-specific nuclease [Bacillus subtilis subsp. subtilis str. 168]	PF14040	DNase_NucA_NucB	Deoxyribonuclease NucA/NucB	-	-	-	-	-	-	-	-
gene0420	-	MULTISPECIES: protein kinase	RP01	Chromosome	Chromosome	+	389412	390215	804	MULTISPECIES: protein kinase	RecName: Full=Probable serine/threonine-protein kinase YbdM [Bacillus subtilis subsp. subtilis str. 168]	PF00069;PF07714;PF03109;PF01163	Pkinase;PK_Tyr_Ser-Thr;ABC1;RIO1	Protein kinase domain;Protein tyrosine and serine/threonine kinase;ABC1 atypical kinase-like domain;RIO1 family	COG0515	Serine/threonine protein kinase	-	-	K08884	serine/threonine protein kinase, bacterial [EC:2.7.11.1]	2.7.11.1	Transferases; Transferring phosphorus-containing groups; Protein-serine/threonine kinases; ATP:protein phosphotransferase (non-specific)
gene0421	-	MULTISPECIES: LXG domain-containing protein	RP01	Chromosome	Chromosome	-	391360	390620	741	MULTISPECIES: LXG domain-containing protein	RecName: Full=Ribonuclease YqcG; AltName: Full=RNase YqcG; AltName: Full=Toxin YqcG [Bacillus subtilis subsp. subtilis str. 168]	PF04740	LXG	LXG domain of WXG superfamily	COG5444	Predicted ribonuclease, toxin component of the YeeF-YezG toxin-antitoxin module	-	-	-	-	-	-
gene0422	hyuA	MULTISPECIES: hydantoinase/oxoprolinase family protein	RP01	Chromosome	Chromosome	+	391764	393818	2055	MULTISPECIES: hydantoinase/oxoprolinase family protein	RecName: Full=Uncharacterized protein MJ0964 [Methanocaldococcus jannaschii DSM 2661]	PF01968;PF05378;PF19278	Hydantoinase_A;Hydant_A_N;Hydant_A_C	Hydantoinase/oxoprolinase;Hydantoinase/oxoprolinase N-terminal region;Hydantoinase/oxoprolinase C-terminal domain	COG0145	N-methylhydantoinase A/oxoprolinase/acetone carboxylase, beta subunit	GO:0016787	hydrolase activity	K01473	N-methylhydantoinase A [EC:3.5.2.14]	3.5.2.14	Hydrolases; Acting on carbon-nitrogen bonds, other than peptide bonds; In cyclic amides; N-methylhydantoin amidohydrolase (ATP-hydrolysing)
gene0423	hyuB	hydantoinase B/oxoprolinase family protein	RP01	Chromosome	Chromosome	+	393821	395815	1995	hydantoinase B/oxoprolinase family protein	RecName: Full=Putative D-/L-hydantoinase subunit B; AltName: Full=Hydantoin utilization protein B [Pseudomonas sp. NS671]	PF02538	Hydantoinase_B	Hydantoinase B/oxoprolinase	COG0146	N-methylhydantoinase B/oxoprolinase/acetone carboxylase, alpha subunit	-	-	K01474	N-methylhydantoinase B [EC:3.5.2.14]	3.5.2.14	Hydrolases; Acting on carbon-nitrogen bonds, other than peptide bonds; In cyclic amides; N-methylhydantoin amidohydrolase (ATP-hydrolysing)
gene0424	-	putative spermidine/putrescine ABC transporter solute-binding protein	RP01	Chromosome	Chromosome	+	395812	396900	1089	putative spermidine/putrescine ABC transporter solute-binding protein	RecName: Full=Spermidine/putrescine-binding periplasmic protein 2; Short=SPBP; Flags: Precursor [Haemophilus influenzae Rd KW20]	PF13416;PF13343;PF01547;PF13531	SBP_bac_8;SBP_bac_6;SBP_bac_1;SBP_bac_11	Bacterial extracellular solute-binding protein;Bacterial extracellular solute-binding protein;Bacterial extracellular solute-binding protein;Bacterial extracellular solute-binding protein	COG0687	Spermidine/putrescine-binding periplasmic protein	-	-	K02055	putative spermidine/putrescine transport system substrate-binding protein	-	-
gene0425	-	MULTISPECIES: ABC transporter ATP-binding protein	RP01	Chromosome	Chromosome	+	396910	398028	1119	MULTISPECIES: ABC transporter ATP-binding protein	RecName: Full=Spermidine/putrescine import ATP-binding protein PotA [Mycolicibacterium vanbaalenii PYR-1]	PF00005;PF08402	ABC_tran;TOBE_2	ABC transporter;TOBE domain	COG3842	ABC-type Fe3+/spermidine/putrescine transport systems, ATPase component	GO:0043190;GO:0005524;GO:0042626	ATP-binding cassette (ABC) transporter complex;;ATP binding;;ATPase-coupled transmembrane transporter activity	K02052	putative spermidine/putrescine transport system ATP-binding protein	-	-
gene0426	-	MULTISPECIES: ABC transporter permease	RP01	Chromosome	Chromosome	+	398015	398881	867	MULTISPECIES: ABC transporter permease	RecName: Full=Spermidine/putrescine transport system permease protein PotB [Salmonella enterica subsp. enterica serovar Typhimurium str. SL1344] >lcl|P0A2J8.1 RecName: Full=Spermidine/putrescine transport system permease protein PotB [Salmonella enterica subsp. enterica serovar Typhi] >lcl|P0CL49.1 RecName: Full=Spermidine/putrescine transport system permease protein PotB [Salmonella enterica sub…	PF00528	BPD_transp_1	Binding-protein-dependent transport system inner membrane component	COG1176	ABC-type spermidine/putrescine transport system, permease component I	GO:0055085;GO:0016021;GO:0005886	transmembrane transport;;integral component of membrane;;plasma membrane	K02054	putative spermidine/putrescine transport system permease protein	-	-
gene0427	-	MULTISPECIES: ABC transporter permease	RP01	Chromosome	Chromosome	+	398874	399686	813	MULTISPECIES: ABC transporter permease	RecName: Full=Spermidine/putrescine transport system permease protein PotC [Haemophilus influenzae Rd KW20]	PF00528	BPD_transp_1	Binding-protein-dependent transport system inner membrane component	COG1177	ABC-type spermidine/putrescine transport system, permease component II	-	-	K02053	putative spermidine/putrescine transport system permease protein	-	-
gene0428	licA	lichenysin non-ribosomal peptide synthetase LicA	RP01	Chromosome	Chromosome	+	400425	411173	10749	lichenysin non-ribosomal peptide synthetase LicA	RecName: Full=Surfactin synthase subunit 1 [Bacillus subtilis subsp. subtilis str. 168]	PF00668;PF00668;PF00668;PF00668;PF00501;PF00501;PF00501;PF00550;PF00550;PF00550;PF13193;PF13193;PF13193	Condensation;Condensation;Condensation;Condensation;AMP-binding;AMP-binding;AMP-binding;PP-binding;PP-binding;PP-binding;AMP-binding_C;AMP-binding_C;AMP-binding_C	Condensation domain;Condensation domain;Condensation domain;Condensation domain;AMP-binding enzyme;AMP-binding enzyme;AMP-binding enzyme;Phosphopantetheine attachment site;Phosphopantetheine attachment site;Phosphopantetheine attachment site;AMP-binding enzyme C-terminal domain;AMP-binding enzyme C-terminal domain;AMP-binding enzyme C-terminal domain	COG0236	Acyl carrier protein	-	-	K16119	lichenysin synthetase A	-	-
gene0429	licB	lichenysin non-ribosomal peptide synthetase LicB	RP01	Chromosome	Chromosome	+	411193	421962	10770	lichenysin non-ribosomal peptide synthetase LicB	RecName: Full=Surfactin synthase subunit 2 [Bacillus subtilis subsp. subtilis str. 168]	PF00668;PF00668;PF00668;PF00668;PF00501;PF00501;PF00501;PF00550;PF00550;PF00550;PF13193;PF13193;PF13193	Condensation;Condensation;Condensation;Condensation;AMP-binding;AMP-binding;AMP-binding;PP-binding;PP-binding;PP-binding;AMP-binding_C;AMP-binding_C;AMP-binding_C	Condensation domain;Condensation domain;Condensation domain;Condensation domain;AMP-binding enzyme;AMP-binding enzyme;AMP-binding enzyme;Phosphopantetheine attachment site;Phosphopantetheine attachment site;Phosphopantetheine attachment site;AMP-binding enzyme C-terminal domain;AMP-binding enzyme C-terminal domain;AMP-binding enzyme C-terminal domain	COG1020	EntF, seryl-AMP synthase component of non-ribosomal peptide synthetase	-	-	K16120	lichenysin synthetase B	-	-
gene0430	licC	MULTISPECIES: lichenysin non-ribosomal peptide synthetase LicC	RP01	Chromosome	Chromosome	+	422020	425868	3849	MULTISPECIES: lichenysin non-ribosomal peptide synthetase LicC	RecName: Full=Surfactin synthase subunit 3 [Bacillus subtilis subsp. subtilis str. 168]	PF00668;PF00501;PF00975;PF13193;PF00550	Condensation;AMP-binding;Thioesterase;AMP-binding_C;PP-binding	Condensation domain;AMP-binding enzyme;Thioesterase domain;AMP-binding enzyme C-terminal domain;Phosphopantetheine attachment site	COG1020	EntF, seryl-AMP synthase component of non-ribosomal peptide synthetase	GO:0009058;GO:0003824;GO:0031177	biosynthetic process;;catalytic activity;;phosphopantetheine binding	K16121	lichenysin synthetase C	-	-
gene0431	srfATE	MULTISPECIES: lichenysin biosynthesis thioesterase LicTE	RP01	Chromosome	Chromosome	+	425872	426639	768	MULTISPECIES: lichenysin biosynthesis thioesterase LicTE	RecName: Full=Surfactin synthase thioesterase subunit; AltName: Full=Cold shock protein CSI16 [Bacillus subtilis subsp. subtilis str. 168]	PF00975;PF12697;PF12146	Thioesterase;Abhydrolase_6;Hydrolase_4	Thioesterase domain;Alpha/beta hydrolase family;Serine aminopeptidase, S33	COG3208	Surfactin synthase thioesterase subunit	GO:0009058	biosynthetic process	K15657	external thioesterase TEII	-	-
gene0432	-	MULTISPECIES: DMT family transporter	RP01	Chromosome	Chromosome	-	427571	426660	912	MULTISPECIES: DMT family transporter	RecName: Full=Uncharacterized transporter YcxC [Bacillus subtilis subsp. subtilis str. 168]	PF00892;PF00892;PF03151	EamA;EamA;TPT	EamA-like transporter family;EamA-like transporter family;Triose-phosphate Transporter family	COG0697	Permease of the drug/metabolite transporter (DMT) superfamily	GO:0016021;GO:0005886	integral component of membrane;;plasma membrane	-	-	-	-
gene0433	-	MULTISPECIES: PLP-dependent aminotransferase family protein	RP01	Chromosome	Chromosome	+	427707	429056	1350	MULTISPECIES: PLP-dependent aminotransferase family protein	RecName: Full=Uncharacterized HTH-type transcriptional regulator YcxD; AltName: Full=ORF8 [Bacillus subtilis subsp. subtilis str. 168]	PF00155;PF00392;PF12897	Aminotran_1_2;GntR;Asp_aminotransf	Aminotransferase class I and II;Bacterial regulatory proteins, gntR family;Aspartate amino-transferase	COG1167	DNA-binding transcriptional regulator, MocR family, contains an aminotransferase domain	GO:0009058;GO:0003700;GO:0030170;GO:0003824	biosynthetic process;;DNA-binding transcription factor activity;;pyridoxal phosphate binding;;catalytic activity	-	-	-	-
gene0434	acpT	MULTISPECIES: 4'-phosphopantetheinyl transferase superfamily protein	RP01	Chromosome	Chromosome	-	429748	429068	681	MULTISPECIES: 4'-phosphopantetheinyl transferase superfamily protein	RecName: Full=4'-phosphopantetheinyl transferase Sfp; AltName: Full=Surfactin synthase-activating enzyme [Bacillus subtilis subsp. subtilis str. 168]	PF01648	ACPS	4'-phosphopantetheinyl transferase superfamily	COG2091	Phosphopantetheinyl transferase	GO:0006633;GO:0000287;GO:0008897	fatty acid biosynthetic process;;magnesium ion binding;;holo-[acyl-carrier-protein] synthase activity	K06133	4'-phosphopantetheinyl transferase [EC:2.7.8.-]	-	-
gene0435	-	MULTISPECIES: alpha/beta hydrolase	RP01	Chromosome	Chromosome	+	429819	430634	816	MULTISPECIES: alpha/beta hydrolase	RecName: Full=Uncharacterized protein YbbA [Bacillus subtilis subsp. subtilis str. 168]	PF00756	Esterase	Putative esterase	COG2819	Predicted hydrolase of the alpha/beta superfamily	GO:0016787	hydrolase activity	-	-	-	-
gene0436	-	MULTISPECIES: AraC family transcriptional regulator	RP01	Chromosome	Chromosome	+	430675	431541	867	MULTISPECIES: AraC family transcriptional regulator	RecName: Full=Uncharacterized HTH-type transcriptional regulator YdeE [Bacillus subtilis subsp. subtilis str. 168]	PF06445;PF14526;PF12833	GyrI-like;Cass2;HTH_18	GyrI-like small molecule binding domain;Integron-associated effector binding protein;Helix-turn-helix domain	COG2207	AraC-type DNA-binding domain and AraC-containing proteins	-	-	K13653	AraC family transcriptional regulator	-	-
gene0437	-	MULTISPECIES: YitT family protein	RP01	Chromosome	Chromosome	-	432231	431569	663	MULTISPECIES: YitT family protein	RecName: Full=Uncharacterized membrane protein YczE [Bacillus subtilis subsp. subtilis str. 168]	-	-	-	COG2364	Uncharacterized membrane protein YczE	GO:0016021	integral component of membrane	K07149	uncharacterized protein	-	-
gene0438	-	hypothetical protein	RP01	Chromosome	Chromosome	+	432597	432785	189	hypothetical protein	-	-	-	-	-	-	-	-	-	-	-	-
gene0439	-	hypothetical protein	RP01	Chromosome	Chromosome	-	433042	432794	249	hypothetical protein	-	-	-	-	-	-	GO:0016021	integral component of membrane	-	-	-	-
gene0440	ddc	L-2,4-diaminobutyrate decarboxylase	RP01	Chromosome	Chromosome	+	433280	434941	1662	L-2,4-diaminobutyrate decarboxylase	RecName: Full=L-2,4-diaminobutyrate decarboxylase; Short=DABA decarboxylase; Short=DABA-DC [Haemophilus influenzae Rd KW20]	PF00282	Pyridoxal_deC	Pyridoxal-dependent decarboxylase conserved domain	COG0076	Glutamate or tyrosine decarboxylase or a related PLP-dependent protein	GO:0019752;GO:0030170;GO:0008483;GO:0016831	carboxylic acid metabolic process;;pyridoxal phosphate binding;;transaminase activity;;carboxy-lyase activity	K13745	L-2,4-diaminobutyrate decarboxylase [EC:4.1.1.86]	4.1.1.86	Lyases; Carbon-carbon lyases; Carboxy-lyases; L-2,4-diaminobutanoate carboxy-lyase (propane-1,3-diamine-forming)
gene0441	mcp	MULTISPECIES: methyl-accepting chemotaxis protein	RP01	Chromosome	Chromosome	+	434956	436680	1725	MULTISPECIES: methyl-accepting chemotaxis protein	RecName: Full=Probable methyl-accepting chemotaxis protein BT9727_0469 [[Bacillus thuringiensis] serovar konkukian str. 97-27]	PF00015;PF00672	MCPsignal;HAMP	Methyl-accepting chemotaxis protein (MCP) signalling domain;HAMP domain	COG3290	Sensor histidine kinase DipB regulating citrate/malate metabolism	GO:0007165;GO:0016021	signal transduction;;integral component of membrane	K03406	methyl-accepting chemotaxis protein	-	-
gene0442	tcyC	MULTISPECIES: amino acid ABC transporter ATP-binding protein	RP01	Chromosome	Chromosome	-	437463	436720	744	MULTISPECIES: amino acid ABC transporter ATP-binding protein	RecName: Full=L-cystine import ATP-binding protein TcyC [Bacillus subtilis subsp. subtilis str. 168]	PF00005	ABC_tran	ABC transporter	COG1126	ABC-type polar amino acid transport system, ATPase component	GO:0005886;GO:0005524;GO:0042626;GO:0015424	plasma membrane;;ATP binding;;ATPase-coupled transmembrane transporter activity;;ABC-type amino acid transporter activity	K10010	L-cystine transport system ATP-binding protein [EC:7.4.2.1]	7.4.2.1	Translocases; Catalysing the translocation of amino acids and peptides; Linked to the hydrolysis of a nucleoside triphosphate; ATP phosphohydrolase (ABC-type, polar-amino-acid-importing)
gene0443	tcyB	MULTISPECIES: amino acid ABC transporter permease	RP01	Chromosome	Chromosome	-	438183	437479	705	MULTISPECIES: amino acid ABC transporter permease	RecName: Full=L-cystine transport system permease protein TcyB [Bacillus subtilis subsp. subtilis str. 168]	PF00528	BPD_transp_1	Binding-protein-dependent transport system inner membrane component	COG0765	ABC-type amino acid transport system, permease component	GO:0006865;GO:0043190;GO:0022857	amino acid transport;;ATP-binding cassette (ABC) transporter complex;;transmembrane transporter activity	K10009	L-cystine transport system permease protein	-	-
gene0444	fliY	MULTISPECIES: cystine ABC transporter substrate-binding lipoprotein TcyA	RP01	Chromosome	Chromosome	-	438976	438170	807	MULTISPECIES: cystine ABC transporter substrate-binding lipoprotein TcyA	RecName: Full=L-cystine-binding protein TcyA; Flags: Precursor [Bacillus subtilis subsp. subtilis str. 168]	PF00497	SBP_bac_3	Bacterial extracellular solute-binding proteins, family 3	COG0834	ABC-type amino acid transport/signal transduction system, periplasmic component/domain	GO:0005886	plasma membrane	K02424	L-cystine transport system substrate-binding protein	-	-
gene0445	rocR	transcriptional regulator RocR	RP01	Chromosome	Chromosome	-	440579	439092	1488	transcriptional regulator RocR	RecName: Full=Arginine utilization regulatory protein RocR [Bacillus subtilis subsp. subtilis str. 168]	PF00158;PF14532;PF02954;PF13426;PF00989;PF07728;PF08448	Sigma54_activat;Sigma54_activ_2;HTH_8;PAS_9;PAS;AAA_5;PAS_4	Sigma-54 interaction domain;Sigma-54 interaction domain;Bacterial regulatory protein, Fis family;PAS domain;PAS fold;AAA domain (dynein-related subfamily);PAS fold	COG3829	RocR-type transcriptional regulator, contains PAS, AAA-type ATPase, and DNA-binding Fis domains	GO:0006355;GO:0005524;GO:0043565;GO:0008134	regulation of transcription, DNA-templated;;ATP binding;;sequence-specific DNA binding;;transcription factor binding	K06714	arginine utilization regulatory protein	-	-
gene0446	rocD	MULTISPECIES: ornithine--oxo-acid transaminase	RP01	Chromosome	Chromosome	+	440748	441950	1203	MULTISPECIES: ornithine--oxo-acid transaminase	RecName: Full=Ornithine aminotransferase; Short=OAT; AltName: Full=Ornithine--oxo-acid aminotransferase [Bacillus subtilis subsp. subtilis str. 168]	PF00202	Aminotran_3	Aminotransferase class-III	COG4992	Acetylornithine/succinyldiaminopimelate/putrescine aminotransferase	-	-	K00819	ornithine--oxo-acid transaminase [EC:2.6.1.13]	2.6.1.13	Transferases; Transferring nitrogenous groups; Transaminases; L-ornithine:2-oxo-acid aminotransferase
gene0447	rocE	MULTISPECIES: amino acid permease	RP01	Chromosome	Chromosome	+	442122	443567	1446	MULTISPECIES: amino acid permease	RecName: Full=Amino-acid permease RocE [Bacillus subtilis subsp. subtilis str. 168]	PF00324;PF13520	AA_permease;AA_permease_2	Amino acid permease;Amino acid permease	COG0833	Amino acid permease	GO:0055085;GO:0006865;GO:0016021	transmembrane transport;;amino acid transport;;integral component of membrane	K02205	arginine/ornithine permease	-	-
gene0448	rocF	MULTISPECIES: arginase	RP01	Chromosome	Chromosome	+	443560	444453	894	MULTISPECIES: arginase	RecName: Full=Arginase [Bacillus subtilis subsp. subtilis str. 168]	PF00491	Arginase	Arginase family	COG0010	Arginase/agmatinase family enzyme	GO:0006525;GO:0000050;GO:0046872;GO:0004053	arginine metabolic process;;urea cycle;;metal ion binding;;arginase activity	K01476	arginase [EC:3.5.3.1]	3.5.3.1	Hydrolases; Acting on carbon-nitrogen bonds, other than peptide bonds; In linear amidines; L-arginine amidinohydrolase
gene0449	bsdA	LysR family transcriptional regulator	RP01	Chromosome	Chromosome	-	445374	444502	873	LysR family transcriptional regulator	RecName: Full=HTH-type transcriptional regulator BsdA; AltName: Full=Bsd operon regulatory protein [Bacillus subtilis subsp. subtilis str. 168]	PF03466;PF00126	LysR_substrate;HTH_1	LysR substrate binding domain;Bacterial regulatory helix-turn-helix protein, lysR family	COG0583	DNA-binding transcriptional regulator, LysR family	GO:0003700	DNA-binding transcription factor activity	K21755	LysR family transcriptional regulator, salicylic acid-responsive activator of bsdBCD	-	-
gene0450	ubiX	MULTISPECIES: UbiX family flavin prenyltransferase	RP01	Chromosome	Chromosome	+	445496	446065	570	MULTISPECIES: UbiX family flavin prenyltransferase	RecName: Full=Probable UbiX-like flavin prenyltransferase; AltName: Full=Phenolic acid decarboxylase subunit B; Short=PAD [Bacillus subtilis subsp. subtilis str. 168]	PF02441	Flavoprotein	Flavoprotein	COG0163	Flavin prenyltransferase UbiX	GO:0009636;GO:0019439;GO:0016829;GO:0106141	response to toxic substance;;aromatic compound catabolic process;;lyase activity;;flavin prenyltransferase activity	K03186	flavin prenyltransferase [EC:2.5.1.129]	2.5.1.129	Transferases; Transferring alkyl or aryl groups, other than methyl groups; Transferring alkyl or aryl groups, other than methyl groups (only sub-subclass identified to date); prenyl-phosphate:FMNH2 prenyltransferase
gene0451	bsdC	UbiD family decarboxylase	RP01	Chromosome	Chromosome	+	446079	447500	1422	UbiD family decarboxylase	RecName: Full=Phenolic acid decarboxylase; Short=PAD; AltName: Full=4-hydroxybenzoate decarboxylase; Short=4-hydroxybenzoate DC; AltName: Full=Phenolic acid decarboxylase subunit C; AltName: Full=Vanillate decarboxylase; Short=Vanillate DC [Bacillus subtilis subsp. subtilis str. 168]	PF01977	UbiD	3-octaprenyl-4-hydroxybenzoate carboxy-lyase	COG0043	3-polyprenyl-4-hydroxybenzoate decarboxylase	GO:0009636;GO:0019439;GO:0046872;GO:0016831	response to toxic substance;;aromatic compound catabolic process;;metal ion binding;;carboxy-lyase activity	K01612	vanillate/4-hydroxybenzoate decarboxylase subunit C [EC:4.1.1.- 4.1.1.61]	4.1.1.61	Lyases; Carbon-carbon lyases; Carboxy-lyases; 4-hydroxybenzoate carboxy-lyase (phenol-forming)
gene0452	bsdD	MULTISPECIES: hypothetical protein	RP01	Chromosome	Chromosome	+	447520	447747	228	MULTISPECIES: hypothetical protein	RecName: Full=Protein BsdD; AltName: Full=Phenolic acid decarboxylase subunit D; Short=PAD [Bacillus subtilis subsp. subtilis str. 168]	-	-	-	-	-	-	-	K21759	vanillate/4-hydroxybenzoate decarboxylase subunit D [EC:4.1.1.- 4.1.1.61]	4.1.1.61	Lyases; Carbon-carbon lyases; Carboxy-lyases; 4-hydroxybenzoate carboxy-lyase (phenol-forming)
gene0453	-	pyridoxamine 5'-phosphate oxidase family protein	RP01	Chromosome	Chromosome	+	447763	448218	456	pyridoxamine 5'-phosphate oxidase family protein	RecName: Full=Uncharacterized protein YclD [Bacillus subtilis subsp. subtilis str. 168]	PF01243	Putative_PNPOx	Pyridoxamine 5'-phosphate oxidase	-	-	-	-	-	-	-	-
gene0454	-	hypothetical protein	RP01	Chromosome	Chromosome	-	448699	448253	447	hypothetical protein	-	-	-	-	-	-	-	-	-	-	-	-
gene0455	-	hypothetical protein	RP01	Chromosome	Chromosome	-	449065	448724	342	hypothetical protein	-	-	-	-	-	-	GO:0016021	integral component of membrane	-	-	-	-
gene0456	-	hypothetical protein	RP01	Chromosome	Chromosome	-	449569	449123	447	hypothetical protein	-	-	-	-	-	-	-	-	-	-	-	-
gene0457	-	hypothetical protein	RP01	Chromosome	Chromosome	-	450270	449590	681	hypothetical protein	-	-	-	-	-	-	-	-	-	-	-	-
gene0458	-	hypothetical protein	RP01	Chromosome	Chromosome	-	450545	450288	258	hypothetical protein	-	-	-	-	-	-	GO:0016021	integral component of membrane	-	-	-	-
gene0459	-	DUF4176 domain-containing protein	RP01	Chromosome	Chromosome	-	451221	450949	273	DUF4176 domain-containing protein	-	PF13780	DUF4176	Domain of unknown function (DUF4176)	COG4495	Uncharacterized conserved protein, DUF4176 domain	-	-	-	-	-	-
gene0460	-	hypothetical protein	RP01	Chromosome	Chromosome	-	451916	451227	690	hypothetical protein	-	-	-	-	-	-	-	-	-	-	-	-
gene0461	yxiD	Ribonuclease YxiD	RP01	Chromosome	Chromosome	-	453370	451940	1431	Ribonuclease YxiD	RecName: Full=Ribonuclease YxiD; AltName: Full=RNase YxiD; AltName: Full=Toxin YxiD [Bacillus subtilis subsp. subtilis str. 168]	PF04740	LXG	LXG domain of WXG superfamily	COG5444	Predicted ribonuclease, toxin component of the YeeF-YezG toxin-antitoxin module	GO:0016021	integral component of membrane	K21493	toxin YxiD [EC:3.1.-.-]	-	-
gene0462	-	MULTISPECIES: YwqI/YxiC family protein	RP01	Chromosome	Chromosome	-	453666	453388	279	MULTISPECIES: YwqI/YxiC family protein	RecName: Full=Uncharacterized protein YxiC [Bacillus subtilis subsp. subtilis str. 168]	PF17279	DUF5344	Family of unknown function (DUF5344)	-	-	-	-	-	-	-	-
gene0463	-	MULTISPECIES: DUF5082 family protein	RP01	Chromosome	Chromosome	-	454063	453680	384	MULTISPECIES: DUF5082 family protein	RecName: Full=Uncharacterized protein YxiB [Bacillus subtilis subsp. subtilis str. 168]	PF16888	DUF5082	Domain of unknown function (DUF5082)	COG5899	Spore coat protein YwqH	GO:0005524	ATP binding	-	-	-	-
gene0464	rbsB	substrate-binding domain-containing protein	RP01	Chromosome	Chromosome	+	454572	455561	990	substrate-binding domain-containing protein	RecName: Full=D-allose-binding periplasmic protein; Short=ALBP; Flags: Precursor [Escherichia coli K-12]	PF13407;PF00532	Peripla_BP_4;Peripla_BP_1	Periplasmic binding protein domain;Periplasmic binding proteins and sugar binding domain of LacI family	COG1879	ABC-type sugar transport system, periplasmic component, contains N-terminal xre family HTH domain	-	-	K10439	ribose transport system substrate-binding protein	-	-
gene0465	yesM	sensor histidine kinase	RP01	Chromosome	Chromosome	+	455548	457317	1770	sensor histidine kinase	RecName: Full=Sensor histidine kinase YesM [Bacillus subtilis subsp. subtilis str. 168]	PF06580;PF02743;PF02518;PF00672	His_kinase;dCache_1;HATPase_c;HAMP	Histidine kinase;Cache domain;Histidine kinase-, DNA gyrase B-, and HSP90-like ATPase;HAMP domain	COG2972	Sensor histidine kinase YesM	-	-	K07718	two-component system, sensor histidine kinase YesM [EC:2.7.13.3]	2.7.13.3	Transferases; Transferring phosphorus-containing groups; Protein-histidine kinases; ATP:protein-L-histidine N-phosphotransferase
gene0466	yesN	response regulator	RP01	Chromosome	Chromosome	+	457310	458512	1203	response regulator	RecName: Full=Uncharacterized transcriptional regulatory protein YesN [Bacillus subtilis subsp. subtilis str. 168]	PF00072;PF12833;PF00165;PF00165	Response_reg;HTH_18;HTH_AraC;HTH_AraC	Response regulator receiver domain;Helix-turn-helix domain;Bacterial regulatory helix-turn-helix proteins, AraC family;Bacterial regulatory helix-turn-helix proteins, AraC family	COG4753	Two-component response regulator, YesN/AraC family, consists of REC and AraC-type DNA-binding domains	GO:0000160;GO:0003700;GO:0043565	phosphorelay signal transduction system;;DNA-binding transcription factor activity;;sequence-specific DNA binding	K07720	two-component system, response regulator YesN	-	-
gene0467	chvE	MULTISPECIES: sugar-binding protein	RP01	Chromosome	Chromosome	+	458639	459718	1080	MULTISPECIES: sugar-binding protein	RecName: Full=Multiple sugar-binding periplasmic receptor ChvE; Flags: Precursor [Agrobacterium fabrum str. C58]	PF13407;PF00532	Peripla_BP_4;Peripla_BP_1	Periplasmic binding protein domain;Periplasmic binding proteins and sugar binding domain of LacI family	COG4213	ABC-type xylose transport system, periplasmic component	-	-	K10546	putative multiple sugar transport system substrate-binding protein	-	-
gene0468	gguA	ATP-binding cassette domain-containing protein	RP01	Chromosome	Chromosome	+	459723	461291	1569	ATP-binding cassette domain-containing protein	RecName: Full=L-arabinose transport ATP-binding protein AraG [Geobacillus stearothermophilus]	PF00005;PF00005	ABC_tran;ABC_tran	ABC transporter;ABC transporter	COG1129	ABC-type sugar transport system, ATPase component	GO:0005524;GO:0042626	ATP binding;;ATPase-coupled transmembrane transporter activity	K10548	putative multiple sugar transport system ATP-binding protein [EC:7.5.2.-]	-	-
gene0469	gguB	MULTISPECIES: sugar ABC transporter permease	RP01	Chromosome	Chromosome	+	461266	462477	1212	MULTISPECIES: sugar ABC transporter permease	RecName: Full=Xylose transport system permease protein XylH [Escherichia coli K-12] >lcl|P0AGI5.1 RecName: Full=Xylose transport system permease protein XylH [Escherichia coli CFT073] >lcl|P0AGI6.1 RecName: Full=Xylose transport system permease protein XylH [Escherichia coli O157:H7] >lcl|P0AGI7.1 RecName: Full=Xylose transport system permease protein XylH [Shigella flexneri]	PF02653	BPD_transp_2	Branched-chain amino acid transport system / permease component	COG4214	ABC-type xylose transport system, permease component	GO:0016021;GO:0005886;GO:0022857	integral component of membrane;;plasma membrane;;transmembrane transporter activity	K10547	putative multiple sugar transport system permease protein	-	-
gene0470	-	MFS transporter	RP01	Chromosome	Chromosome	-	463793	462525	1269	MFS transporter	RecName: Full=Uncharacterized MFS-type transporter YbfB [Bacillus subtilis subsp. subtilis str. 168]	PF07690;PF07690	MFS_1;MFS_1	Major Facilitator Superfamily;Major Facilitator Superfamily	COG2271	Sugar phosphate permease	GO:0016021;GO:0005886;GO:0022857	integral component of membrane;;plasma membrane;;transmembrane transporter activity	-	-	-	-
gene0471	-	helix-turn-helix domain-containing GNAT family N-acetyltransferase	RP01	Chromosome	Chromosome	-	464726	463809	918	helix-turn-helix domain-containing GNAT family N-acetyltransferase	RecName: Full=Putative HTH-type DNA-binding domain-containing acetyltransferase YbfA [Bacillus subtilis subsp. subtilis str. 168]	PF00583;PF13673;PF13508;PF01047;PF12802;PF13420;PF13412	Acetyltransf_1;Acetyltransf_10;Acetyltransf_7;MarR;MarR_2;Acetyltransf_4;HTH_24	Acetyltransferase (GNAT) family;Acetyltransferase (GNAT) domain;Acetyltransferase (GNAT) domain;MarR family;MarR family;Acetyltransferase (GNAT) domain;Winged helix-turn-helix DNA-binding	COG1846	DNA-binding transcriptional regulator, MarR family	GO:0003700;GO:0008080	DNA-binding transcription factor activity;;N-acetyltransferase activity	-	-	-	-
gene0472	bgaB	beta-galactosidase	RP01	Chromosome	Chromosome	+	464999	467071	2073	beta-galactosidase	RecName: Full=Beta-galactosidase BglY; Short=Beta-gal [Alicyclobacillus acidocaldarius subsp. acidocaldarius DSM 446]	PF02449;PF08532;PF08533	Glyco_hydro_42;Glyco_hydro_42M;Glyco_hydro_42C	Beta-galactosidase;Beta-galactosidase trimerisation domain;Beta-galactosidase C-terminal domain	COG1874	Beta-galactosidase GanA	GO:0006012;GO:0009341;GO:0046872;GO:0004565	galactose metabolic process;;beta-galactosidase complex;;metal ion binding;;beta-galactosidase activity	K12308	beta-galactosidase [EC:3.2.1.23]	3.2.1.23	Hydrolases; Glycosylases; Glycosidases, i.e. enzymes that hydrolyse O- and S-glycosyl compounds; beta-D-galactoside galactohydrolase
gene0473	-	phytase	RP01	Chromosome	Chromosome	-	468458	467313	1146	phytase	RecName: Full=3-phytase; AltName: Full=Myo-inositol-hexaphosphate 3-phosphohydrolase; AltName: Full=Phytate 3-phosphatase; Flags: Precursor [Bacillus subtilis subsp. subtilis str. 168]	PF02333	Phytase	Phytase	COG4247	3-phytase (myo-inositol-hexaphosphate 3-phosphohydrolase)	GO:0016158	3-phytase activity	K01083	3-phytase [EC:3.1.3.8]	3.1.3.8	Hydrolases; Acting on ester bonds; Phosphoric-monoester hydrolases; myo-inositol-hexakisphosphate 3-phosphohydrolase
gene0474	-	GyrI-like domain-containing protein	RP01	Chromosome	Chromosome	-	469095	468637	459	GyrI-like domain-containing protein	-	PF06445;PF14526	GyrI-like;Cass2	GyrI-like small molecule binding domain;Integron-associated effector binding protein	-	-	-	-	-	-	-	-
gene0475	-	MULTISPECIES: peptide MFS transporter	RP01	Chromosome	Chromosome	-	470678	469188	1491	MULTISPECIES: peptide MFS transporter	RecName: Full=Uncharacterized transporter YclF [Bacillus subtilis subsp. subtilis str. 168]	PF00854;PF07690	PTR2;MFS_1	POT family;Major Facilitator Superfamily	COG3104	Dipeptide/tripeptide permease	GO:0006857;GO:0016021;GO:0005886;GO:1904680	oligopeptide transport;;integral component of membrane;;plasma membrane;;peptide transmembrane transporter activity	K03305	proton-dependent oligopeptide transporter, POT family	-	-
gene0476	-	right-handed parallel beta-helix repeat-containing protein	RP01	Chromosome	Chromosome	+	470948	472705	1758	right-handed parallel beta-helix repeat-containing protein	RecName: Full=Uncharacterized protein YclG [Bacillus subtilis subsp. subtilis str. 168]	PF13229;PF13229;PF13229;PF13229;PF12708	Beta_helix;Beta_helix;Beta_helix;Beta_helix;Pectate_lyase_3	Right handed beta helix region;Right handed beta helix region;Right handed beta helix region;Right handed beta helix region;Pectate lyase superfamily protein	COG5434	Polygalacturonase	-	-	-	-	-	-
gene0477	-	MULTISPECIES: hypothetical protein	RP01	Chromosome	Chromosome	-	472947	472729	219	MULTISPECIES: hypothetical protein	-	-	-	-	-	-	GO:0016021	integral component of membrane	-	-	-	-
gene0478	gerKA	Spore germination protein A1	RP01	Chromosome	Chromosome	+	473042	474715	1674	Spore germination protein A1	RecName: Full=Spore germination protein KA [Bacillus subtilis subsp. subtilis str. 168]	PF03323	GerA	Bacillus/Clostridium GerA spore germination protein	COG5901	Spore germination receptor GerABC, GerA subunit (L-alanine receptor)	-	-	K06295	spore germination protein KA	-	-
gene0479	gerKC	MULTISPECIES: Ger(x)C family spore germination protein	RP01	Chromosome	Chromosome	+	474699	475922	1224	MULTISPECIES: Ger(x)C family spore germination protein	RecName: Full=Spore germination protein KC; Flags: Precursor [Bacillus subtilis subsp. subtilis str. 168]	PF05504	Spore_GerAC	Spore germination B3/ GerAC like, C-terminal	COG5903	Spore germination receptor GerABC, GerC subunit	-	-	K06297	spore germination protein KC	-	-
gene0480	gerKB	GerAB/ArcD/ProY family transporter	RP01	Chromosome	Chromosome	+	475947	477053	1107	GerAB/ArcD/ProY family transporter	RecName: Full=Spore germination protein KB [Bacillus subtilis subsp. subtilis str. 168]	PF03845	Spore_permease	Spore germination protein	COG5902	Spore germination receptor GerABC, GerB subunit (amino acid transporter)	-	-	K06296	spore germination protein KB	-	-
gene0481	-	MULTISPECIES: MerR family transcriptional regulator	RP01	Chromosome	Chromosome	+	477109	477840	732	MULTISPECIES: MerR family transcriptional regulator	RecName: Full=HTH-type transcriptional activator mta; AltName: Full=Multidrug transporter activation protein [Bacillus subtilis subsp. subtilis str. 168]	PF13411;PF07739;PF00376	MerR_1;TipAS;MerR	MerR HTH family regulatory protein;TipAS antibiotic-recognition domain;MerR family regulatory protein	COG0789	DNA-binding transcriptional regulator, MerR family	-	-	-	-	-	-
gene0482	-	MULTISPECIES: ABC transporter ATP-binding protein	RP01	Chromosome	Chromosome	-	478553	477870	684	MULTISPECIES: ABC transporter ATP-binding protein	RecName: Full=Uncharacterized ABC transporter ATP-binding protein YclH [Bacillus subtilis subsp. subtilis str. 168]	PF00005	ABC_tran	ABC transporter	COG1136	ABC-type lipoprotein export system, ATPase component	-	-	K02003	putative ABC transport system ATP-binding protein	-	-
gene0483	-	MULTISPECIES: ABC transporter permease	RP01	Chromosome	Chromosome	-	480008	478569	1440	MULTISPECIES: ABC transporter permease	RecName: Full=Uncharacterized ABC transporter permease YclI [Bacillus subtilis subsp. subtilis str. 168]	PF02687;PF12704	FtsX;MacB_PCD	FtsX-like permease family;MacB-like periplasmic core domain	COG4591	ABC-type transport system involved in lipoprotein release, permease component LolC	-	-	K02004	putative ABC transport system permease protein	-	-
gene0484	-	MULTISPECIES: response regulator transcription factor	RP01	Chromosome	Chromosome	+	480226	480912	687	MULTISPECIES: response regulator transcription factor	RecName: Full=Uncharacterized transcriptional regulatory protein YclJ [Bacillus subtilis subsp. subtilis str. 168]	PF00486;PF00072	Trans_reg_C;Response_reg	Transcriptional regulatory protein, C terminal;Response regulator receiver domain	COG0745	DNA-binding response regulator, OmpR family, contains REC and winged-helix (wHTH) domain	GO:0006355;GO:0000160;GO:0005737;GO:0003677	regulation of transcription, DNA-templated;;phosphorelay signal transduction system;;cytoplasm;;DNA binding	K02483	two-component system, OmpR family, response regulator	-	-
gene0485	-	MULTISPECIES: HAMP domain-containing histidine kinase	RP01	Chromosome	Chromosome	+	480902	482329	1428	MULTISPECIES: HAMP domain-containing histidine kinase	RecName: Full=Sensor histidine kinase YclK [Bacillus subtilis subsp. subtilis str. 168]	PF02518;PF00512;PF00672;PF13589	HATPase_c;HisKA;HAMP;HATPase_c_3	Histidine kinase-, DNA gyrase B-, and HSP90-like ATPase;His Kinase A (phospho-acceptor) domain;HAMP domain;Histidine kinase-, DNA gyrase B-, and HSP90-like ATPase	COG0642	Signal transduction histidine kinase	GO:0016021;GO:0005524;GO:0000155	integral component of membrane;;ATP binding;;phosphorelay sensor kinase activity	-	-	-	-
gene0486	mcp	MULTISPECIES: methyl-accepting chemotaxis protein	RP01	Chromosome	Chromosome	-	484080	482362	1719	MULTISPECIES: methyl-accepting chemotaxis protein	RecName: Full=Probable methyl-accepting chemotaxis protein BT9727_0469 [[Bacillus thuringiensis] serovar konkukian str. 97-27]	PF00015;PF12729;PF00672;PF02203	MCPsignal;4HB_MCP_1;HAMP;TarH	Methyl-accepting chemotaxis protein (MCP) signalling domain;Four helix bundle sensory module for signal transduction;HAMP domain;Tar ligand binding domain homologue	COG0840	Methyl-accepting chemotaxis protein (MCP)	-	-	K03406	methyl-accepting chemotaxis protein	-	-
gene0487	lysC	MULTISPECIES: aspartate kinase	RP01	Chromosome	Chromosome	-	485577	484216	1362	MULTISPECIES: aspartate kinase	RecName: Full=Aspartokinase 3; AltName: Full=Aspartate kinase 3; AltName: Full=Aspartokinase III [Bacillus subtilis subsp. subtilis str. 168]	PF00696;PF13840	AA_kinase;ACT_7	Amino acid kinase family;ACT domain	COG0527	Aspartate kinase	GO:0009089;GO:0009088;GO:0005524;GO:0004072	lysine biosynthetic process via diaminopimelate;;threonine biosynthetic process;;ATP binding;;aspartate kinase activity	K00928	aspartate kinase [EC:2.7.2.4]	2.7.2.4	Transferases; Transferring phosphorus-containing groups; Phosphotransferases with a carboxy group as acceptor; ATP:L-aspartate 4-phosphotransferase
gene0488	yclN	MULTISPECIES: ABC transporter permease	RP01	Chromosome	Chromosome	+	485855	486808	954	MULTISPECIES: ABC transporter permease	RecName: Full=Petrobactin import system permease protein YclN [Bacillus subtilis subsp. subtilis str. 168]	PF01032	FecCD	FecCD transport family	COG4606	ABC-type enterochelin transport system, permease component	GO:0016021;GO:0005886;GO:0022857	integral component of membrane;;plasma membrane;;transmembrane transporter activity	K25284	iron-siderophore transport system permease protein	-	-
gene0489	yclO	MULTISPECIES: iron chelate uptake ABC transporter family permease subunit	RP01	Chromosome	Chromosome	+	486798	487742	945	MULTISPECIES: iron chelate uptake ABC transporter family permease subunit	RecName: Full=Petrobactin import system permease protein YclO [Bacillus subtilis subsp. subtilis str. 168]	PF01032	FecCD	FecCD transport family	COG4605	ABC-type enterochelin transport system, permease component	GO:0016021;GO:0005886;GO:0022857	integral component of membrane;;plasma membrane;;transmembrane transporter activity	K25283	iron-siderophore transport system permease protein	-	-
gene0490	yclP	putative siderophore transport system ATP-binding protein YusV	RP01	Chromosome	Chromosome	+	487739	488500	762	putative siderophore transport system ATP-binding protein YusV	RecName: Full=Petrobactin import ATP-binding protein YclP [Bacillus subtilis subsp. subtilis str. 168]	PF00005	ABC_tran	ABC transporter	COG4604	ABC-type enterochelin transport system, ATPase component	-	-	K25285	iron-siderophore transport system ATP-binding protein [EC:7.2.2.-]	-	-
gene0491	yclQ	MULTISPECIES: siderophore ABC transporter substrate-binding protein	RP01	Chromosome	Chromosome	+	488515	489462	948	MULTISPECIES: siderophore ABC transporter substrate-binding protein	RecName: Full=Petrobactin-binding protein YclQ; Flags: Precursor [Bacillus subtilis subsp. subtilis str. 168]	PF01497	Peripla_BP_2	Periplasmic binding protein	COG4607	ABC-type enterochelin transport system, periplasmic component	GO:0006826	iron ion transport	K25282	iron-siderophore transport system substrate-binding protein	-	-
gene0492	-	DHA2 family efflux MFS transporter permease subunit	RP01	Chromosome	Chromosome	-	491063	489642	1422	DHA2 family efflux MFS transporter permease subunit	RecName: Full=Uncharacterized MFS-type transporter YcnB [Bacillus subtilis subsp. subtilis str. 168]	PF07690	MFS_1	Major Facilitator Superfamily	COG2814	Predicted arabinose efflux permease AraJ, MFS family	-	-	-	-	-	-
gene0493	-	transcriptional regulator	RP01	Chromosome	Chromosome	-	491962	491075	888	transcriptional regulator	RecName: Full=Uncharacterized HTH-type transcriptional regulator YcnC [Bacillus subtilis subsp. subtilis str. 168]	PF00440	TetR_N	Bacterial regulatory proteins, tetR family	COG1309	DNA-binding protein, AcrR family, includes nucleoid occlusion protein SlmA	GO:0003677	DNA binding	-	-	-	-
gene0494	-	isocitrate lyase/phosphoenolpyruvate mutase family protein	RP01	Chromosome	Chromosome	-	492899	492057	843	isocitrate lyase/phosphoenolpyruvate mutase family protein	RecName: Full=Uncharacterized protein MT2054 [Mycobacterium tuberculosis CDC1551] >lcl|P9WLN9.1 RecName: Full=Uncharacterized protein Rv1998c [Mycobacterium tuberculosis H37Rv]	PF13714	PEP_mutase	Phosphoenolpyruvate phosphomutase	COG2513	2-Methylisocitrate lyase and related enzymes, PEP mutase family	-	-	-	-	-	-
gene0495	nfrA2	oxygen-insensitive NADPH nitroreductase	RP01	Chromosome	Chromosome	-	493747	493010	738	oxygen-insensitive NADPH nitroreductase	RecName: Full=FMN reductase [NAD(P)H]; AltName: Full=NAD(P)H-dependent FMN reductase; AltName: Full=NAD(P)H-dependent nitro/flavin reductase; AltName: Full=NAD(P)H-dependent nitroreductase; AltName: Full=NAD(P)H-dependent oxidoreductase [Bacillus subtilis subsp. subtilis str. 168]	PF00881	Nitroreductase	Nitroreductase family	COG0778	Nitroreductase	GO:0016491	oxidoreductase activity	K19286	FMN reductase [NAD(P)H] [EC:1.5.1.39]	1.5.1.39	Oxidoreductases; Acting on the CH-NH group of donors; With NAD+ or NADP+ as acceptor; FMNH2:NAD(P)+ oxidoreductase
gene0496	-	antibiotic biosynthesis monooxygenase	RP01	Chromosome	Chromosome	-	494053	493766	288	antibiotic biosynthesis monooxygenase	RecName: Full=Putative monooxygenase YcnE [Bacillus subtilis subsp. subtilis str. 168]	PF03992	ABM	Antibiotic biosynthesis monooxygenase	COG1359	Quinol monooxygenase YgiN	GO:0004497	monooxygenase activity	-	-	-	-
gene0497	-	metalloregulator ArsR/SmtB family transcription factor	RP01	Chromosome	Chromosome	+	494231	494527	297	metalloregulator ArsR/SmtB family transcription factor	RecName: Full=Uncharacterized HTH-type transcriptional regulator YczG [Bacillus subtilis subsp. subtilis str. 168]	PF01022;PF12840	HTH_5;HTH_20	Bacterial regulatory protein, arsR family;Helix-turn-helix domain	COG0640	DNA-binding transcriptional regulator, ArsR family	GO:0003700	DNA-binding transcription factor activity	-	-	-	-
gene0498	-	PLP-dependent aminotransferase family protein	RP01	Chromosome	Chromosome	-	496022	494592	1431	PLP-dependent aminotransferase family protein	RecName: Full=HTH-type transcriptional regulatory protein GabR [Bacillus subtilis subsp. subtilis str. 168]	PF00155;PF00392	Aminotran_1_2;GntR	Aminotransferase class I and II;Bacterial regulatory proteins, gntR family	COG1167	DNA-binding transcriptional regulator, MocR family, contains an aminotransferase domain	-	-	K00375	GntR family transcriptional regulator / MocR family aminotransferase	-	-
gene0499	gabT	MULTISPECIES: 4-aminobutyrate--2-oxoglutarate transaminase	RP01	Chromosome	Chromosome	+	496125	497438	1314	MULTISPECIES: 4-aminobutyrate--2-oxoglutarate transaminase	RecName: Full=Probable 4-aminobutyrate aminotransferase; AltName: Full=(S)-3-amino-2-methylpropionate transaminase; AltName: Full=GABA aminotransferase; Short=GABA-AT; AltName: Full=Gamma-amino-N-butyrate transaminase; Short=GABA transaminase; AltName: Full=Glutamate:succinic semialdehyde transaminase; AltName: Full=L-AIBAT [Bacillus subtilis subsp. subtilis str. 168]	PF00202	Aminotran_3	Aminotransferase class-III	COG0160	Acetylornithine aminotransferase/4-aminobutyrate aminotransferase	GO:0009448;GO:0030170;GO:0003867	gamma-aminobutyric acid metabolic process;;pyridoxal phosphate binding;;4-aminobutyrate transaminase activity	K07250	4-aminobutyrate aminotransferase / (S)-3-amino-2-methylpropionate transaminase / 5-aminovalerate transaminase [EC:2.6.1.19 2.6.1.22 2.6.1.48]	2.6.1.19;2.6.1.48;2.6.1.22	Transferases; Transferring nitrogenous groups; Transaminases; 4-aminobutanoate:2-oxoglutarate aminotransferase|Transferases; Transferring nitrogenous groups; Transaminases; 5-aminopentanoate:2-oxoglutarate aminotransferase|Transferases; Transferring nitrogenous groups; Transaminases; (S)-3-amino-2-methylpropanoate:2-oxoglutarate aminotransferase
gene0500	-	MULTISPECIES: APC family permease	RP01	Chromosome	Chromosome	+	497472	498863	1392	MULTISPECIES: APC family permease	RecName: Full=Uncharacterized amino acid permease YhdG [Bacillus subtilis subsp. subtilis str. 168]	PF13520;PF00324	AA_permease_2;AA_permease	Amino acid permease;Amino acid permease	COG0531	Serine transporter YbeC, amino acid:H+ symporter family	GO:0016021;GO:0022857	integral component of membrane;;transmembrane transporter activity	-	-	-	-
gene0501	gabD	MULTISPECIES: succinate-semialdehyde dehydrogenase	RP01	Chromosome	Chromosome	+	498838	500232	1395	MULTISPECIES: succinate-semialdehyde dehydrogenase	RecName: Full=Succinate-semialdehyde dehydrogenase [NADP(+)]; Short=SSDH [Bacillus subtilis subsp. subtilis str. 168]	PF00171	Aldedh	Aldehyde dehydrogenase family	COG1012	Acyl-CoA reductase or other NAD-dependent aldehyde dehydrogenase	-	-	K00135	succinate-semialdehyde dehydrogenase / glutarate-semialdehyde dehydrogenase [EC:1.2.1.16 1.2.1.79 1.2.1.20]	1.2.1.20;1.2.1.16;1.2.1.79	Oxidoreductases; Acting on the aldehyde or oxo group of donors; With NAD+ or NADP+ as acceptor; glutarate-semialdehyde:NADP+ oxidoreductase|Oxidoreductases; Acting on the aldehyde or oxo group of donors; With NAD+ or NADP+ as acceptor; succinate-semialdehyde:NAD(P)+ oxidoreductase|Oxidoreductases; Acting on the aldehyde or oxo group of donors; With NAD+ or NADP+ as acceptor; succinate-semialdehyd…
gene0502	-	MULTISPECIES: DMT family transporter	RP01	Chromosome	Chromosome	-	501162	500278	885	MULTISPECIES: DMT family transporter	RecName: Full=Uncharacterized transporter YwfM [Bacillus subtilis subsp. subtilis str. 168]	PF00892;PF00892	EamA;EamA	EamA-like transporter family;EamA-like transporter family	COG0697	Permease of the drug/metabolite transporter (DMT) superfamily	GO:0016021;GO:0005886	integral component of membrane;;plasma membrane	K03298	drug/metabolite transporter, DME family	-	-
gene0503	-	MULTISPECIES: hypothetical protein	RP01	Chromosome	Chromosome	+	501318	501809	492	MULTISPECIES: hypothetical protein	-	-	-	-	-	-	-	-	-	-	-	-
gene0504	-	MULTISPECIES: DUF1775 domain-containing protein	RP01	Chromosome	Chromosome	-	502501	501857	645	MULTISPECIES: DUF1775 domain-containing protein	RecName: Full=Uncharacterized protein YcnI; Flags: Precursor [Bacillus subtilis subsp. subtilis str. 168]	PF07987	DUF1775	Domain of unkown function (DUF1775)	COG4549	Uncharacterized conserved protein YcnI, contains cohesin/reeler-like domain	-	-	-	-	-	-
gene0505	ycnJ	Copper transport protein YcnJ	RP01	Chromosome	Chromosome	-	504141	502504	1638	Copper transport protein YcnJ	RecName: Full=Copper transport protein YcnJ; Flags: Precursor [Bacillus subtilis subsp. subtilis str. 168]	PF04234;PF05425	CopC;CopD	CopC domain;Copper resistance protein D	COG1276	Putative copper export protein	-	-	K14166	copper transport protein	-	-
gene0506	ycnK	MULTISPECIES: DeoR family transcriptional regulator	RP01	Chromosome	Chromosome	-	504742	504170	573	MULTISPECIES: DeoR family transcriptional regulator	RecName: Full=HTH-type transcriptional repressor YcnK [Bacillus subtilis subsp. subtilis str. 168]	PF08220;PF08279;PF05573;PF13384	HTH_DeoR;HTH_11;NosL;HTH_23	DeoR-like helix-turn-helix domain;HTH domain;NosL;Homeodomain-like domain	COG1349	DNA-binding transcriptional regulator of sugar metabolism, DeoR/GlpR family	GO:0003700	DNA-binding transcription factor activity	K21601	DeoR family transcriptional regulator, copper-sensing transcriptional repressor	-	-
gene0507	nirB	MULTISPECIES: nitrite reductase large subunit NirB	RP01	Chromosome	Chromosome	+	505001	507295	2295	MULTISPECIES: nitrite reductase large subunit NirB	RecName: Full=Assimilatory nitrate reductase electron transfer subunit [Bacillus subtilis subsp. subtilis str. 168]	PF07992;PF04324;PF04324;PF00070;PF18267;PF01077;PF13738;PF03460	Pyr_redox_2;Fer2_BFD;Fer2_BFD;Pyr_redox;Rubredoxin_C;NIR_SIR;Pyr_redox_3;NIR_SIR_ferr	Pyridine nucleotide-disulphide oxidoreductase;BFD-like [2Fe-2S] binding domain;BFD-like [2Fe-2S] binding domain;Pyridine nucleotide-disulphide oxidoreductase;Rubredoxin NAD+ reductase C-terminal domain;Nitrite and sulphite reductase 4Fe-4S domain;Pyridine nucleotide-disulphide oxidoreductase;Nitrite/Sulfite reductase ferredoxin-like half domain	COG1251	NAD(P)H-nitrite reductase, large subunit	-	-	K00362	nitrite reductase (NADH) large subunit [EC:1.7.1.15]	1.7.1.15	Oxidoreductases; Acting on other nitrogenous compounds as donors; With NAD+ or NADP+ as acceptor; ammonia:NAD+ oxidoreductase
gene0508	nasA	nitrate reductase	RP01	Chromosome	Chromosome	+	507297	509456	2160	nitrate reductase	RecName: Full=Assimilatory nitrate reductase catalytic subunit [Bacillus subtilis subsp. subtilis str. 168]	PF00384;PF01568;PF04879	Molybdopterin;Molydop_binding;Molybdop_Fe4S4	Molybdopterin oxidoreductase;Molydopterin dinucleotide binding domain;Molybdopterin oxidoreductase Fe4S4 domain	COG3383	Predicted molibdopterin-dependent oxidoreductase YjgC	GO:0046872;GO:0016491;GO:0051536;GO:0043546	metal ion binding;;oxidoreductase activity;;iron-sulfur cluster binding;;molybdopterin cofactor binding	K00372	assimilatory nitrate reductase catalytic subunit [EC:1.7.99.-]	-	-
gene0509	nirB	MULTISPECIES: nitrite reductase large subunit NirB	RP01	Chromosome	Chromosome	+	509570	511990	2421	MULTISPECIES: nitrite reductase large subunit NirB	RecName: Full=Nitrite reductase [NAD(P)H] [Bacillus subtilis subsp. subtilis str. 168]	PF07992;PF04324;PF04324;PF01077;PF00070;PF18267;PF13738;PF03460	Pyr_redox_2;Fer2_BFD;Fer2_BFD;NIR_SIR;Pyr_redox;Rubredoxin_C;Pyr_redox_3;NIR_SIR_ferr	Pyridine nucleotide-disulphide oxidoreductase;BFD-like [2Fe-2S] binding domain;BFD-like [2Fe-2S] binding domain;Nitrite and sulphite reductase 4Fe-4S domain;Pyridine nucleotide-disulphide oxidoreductase;Rubredoxin NAD+ reductase C-terminal domain;Pyridine nucleotide-disulphide oxidoreductase;Nitrite/Sulfite reductase ferredoxin-like half domain	COG1251	NAD(P)H-nitrite reductase, large subunit	-	-	K00362	nitrite reductase (NADH) large subunit [EC:1.7.1.15]	1.7.1.15	Oxidoreductases; Acting on other nitrogenous compounds as donors; With NAD+ or NADP+ as acceptor; ammonia:NAD+ oxidoreductase
gene0510	nirD	MULTISPECIES: nitrite reductase small subunit NirD	RP01	Chromosome	Chromosome	+	512021	512341	321	MULTISPECIES: nitrite reductase small subunit NirD	RecName: Full=Assimilatory nitrite reductase [NAD(P)H] small subunit [Bacillus subtilis subsp. subtilis str. 168]	PF13806;PF00355	Rieske_2;Rieske	Rieske-like [2Fe-2S] domain;Rieske [2Fe-2S] domain	COG2146	Ferredoxin subunit of nitrite reductase or a ring-hydroxylating dioxygenase	GO:0042128;GO:0046872;GO:0051537;GO:0008942	nitrate assimilation;;metal ion binding;;2 iron, 2 sulfur cluster binding;;nitrite reductase [NAD(P)H] activity	K00363	nitrite reductase (NADH) small subunit [EC:1.7.1.15]	1.7.1.15	Oxidoreductases; Acting on other nitrogenous compounds as donors; With NAD+ or NADP+ as acceptor; ammonia:NAD+ oxidoreductase
gene0511	cobA-hemD	MULTISPECIES: uroporphyrinogen-III C-methyltransferase	RP01	Chromosome	Chromosome	+	512472	513932	1461	MULTISPECIES: uroporphyrinogen-III C-methyltransferase	RecName: Full=Uroporphyrinogen-III C-methyltransferase; Short=Urogen III methylase; AltName: Full=SUMT; AltName: Full=Uroporphyrinogen III methylase; Short=UROM [Bacillus subtilis subsp. subtilis str. 168]	PF00590	TP_methylase	Tetrapyrrole (Corrin/Porphyrin) Methylases	COG0007	Uroporphyrinogen-III methylase (siroheme synthase)	-	-	K13542	uroporphyrinogen III methyltransferase / synthase [EC:2.1.1.107 4.2.1.75]	2.1.1.107;4.2.1.75	Transferases; Transferring one-carbon groups; Methyltransferases; S-adenosyl-L-methionine:uroporphyrinogen-III C-methyltransferase|Lyases; Carbon-oxygen lyases; Hydro-lyases; hydroxymethylbilane hydro-lyase (cyclizing; uroporphyrinogen-III-forming)
gene0512	-	MULTISPECIES: GntR family transcriptional regulator	RP01	Chromosome	Chromosome	-	514638	513958	681	MULTISPECIES: GntR family transcriptional regulator	RecName: Full=Uncharacterized HTH-type transcriptional regulator YdhC [Bacillus subtilis subsp. subtilis str. 168]	PF07729;PF00392	FCD;GntR	FCD domain;Bacterial regulatory proteins, gntR family	COG1802	DNA-binding transcriptional regulator, GntR family	-	-	-	-	-	-
gene0513	-	DASS family sodium-coupled anion symporter	RP01	Chromosome	Chromosome	+	514866	516509	1644	DASS family sodium-coupled anion symporter	RecName: Full=Sodium-dependent dicarboxylate transporter SdcS; AltName: Full=Na(+)/dicarboxylate symporter [Staphylococcus saprophyticus subsp. saprophyticus ATCC 15305 = NCTC 7292]	PF00939;PF03600	Na_sulph_symp;CitMHS	Sodium:sulfate symporter transmembrane region;Citrate transporter	COG0471	Di- and tricarboxylate antiporter	-	-	K14445	solute carrier family 13 (sodium-dependent dicarboxylate transporter), member 2/3/5	-	-
gene0514	-	beta-hydroxyacyl-ACP dehydratase	RP01	Chromosome	Chromosome	+	516639	517034	396	beta-hydroxyacyl-ACP dehydratase	RecName: Full=Uncharacterized protein YcsD [Bacillus subtilis subsp. subtilis str. 168]	PF07977	FabA	FabA-like domain	COG0764	3-hydroxymyristoyl/3-hydroxydecanoyl-(acyl carrier protein) dehydratase	-	-	-	-	-	-
gene0515	-	tRNA (N6-threonylcarbamoyladenosine(37)-N6)-methyltransferase TrmO	RP01	Chromosome	Chromosome	+	517050	517514	465	tRNA (N6-threonylcarbamoyladenosine(37)-N6)-methyltransferase TrmO	RecName: Full=Putative S-adenosylmethionine-dependent methyltransferase RcsF [Pseudomonas aeruginosa]	PF01980	TrmO	tRNA-methyltransferase O	COG1720	tRNA (Thr-GGU) A37 N6-methylase	-	-	-	-	-	-
gene0516	ulaC	Ascorbate-specific PTS system EIIA component	RP01	Chromosome	Chromosome	+	517562	519736	2175	Ascorbate-specific PTS system EIIA component	RecName: Full=Ascorbate-specific PTS system EIIA component; AltName: Full=Ascorbate-specific phosphotransferase enzyme IIA component [Escherichia coli K-12] >lcl|P69821.1 RecName: Full=Ascorbate-specific PTS system EIIA component; AltName: Full=Ascorbate-specific phosphotransferase enzyme IIA component [Escherichia coli O157:H7]	PF00359;PF00874;PF05043;PF08279;PF02302	PTS_EIIA_2;PRD;Mga;HTH_11;PTS_IIB	Phosphoenolpyruvate-dependent sugar phosphotransferase system, EIIA 2;PRD domain;Mga helix-turn-helix domain;HTH domain;PTS system, Lactose/Cellobiose specific IIB subunit	COG1762	Phosphotransferase system mannitol/fructose-specific IIA domain (Ntr-type)	-	-	K02821	ascorbate PTS system EIIA or EIIAB component [EC:2.7.1.194]	2.7.1.194	Transferases; Transferring phosphorus-containing groups; Phosphotransferases with an alcohol group as acceptor; protein-Npi-phospho-L-histidine:L-ascorbate Npi-phosphotransferase
gene0517	ulaB	MULTISPECIES: PTS sugar transporter subunit IIB	RP01	Chromosome	Chromosome	+	519753	520034	282	MULTISPECIES: PTS sugar transporter subunit IIB	-	PF02302	PTS_IIB	PTS system, Lactose/Cellobiose specific IIB subunit	COG3414	Phosphotransferase system, galactitol-specific IIB component	GO:0009401;GO:0008982	phosphoenolpyruvate-dependent sugar phosphotransferase system;;protein-N(PI)-phosphohistidine-sugar phosphotransferase activity	K02822	ascorbate PTS system EIIB component [EC:2.7.1.194]	2.7.1.194	Transferases; Transferring phosphorus-containing groups; Phosphotransferases with an alcohol group as acceptor; protein-Npi-phospho-L-histidine:L-ascorbate Npi-phosphotransferase
gene0518	ulaA	MULTISPECIES: PTS ascorbate transporter subunit IIC	RP01	Chromosome	Chromosome	+	520058	521431	1374	MULTISPECIES: PTS ascorbate transporter subunit IIC	RecName: Full=Ascorbate-specific PTS system EIIC component; AltName: Full=Ascorbate-specific permease IIC component UlaA [Shigella dysenteriae Sd197]	PF03611	EIIC-GAT	PTS system sugar-specific permease component	COG3037	Ascorbate-specific PTS system IIC component UlaA	-	-	K03475	ascorbate PTS system EIIC component	-	-
gene0519	tktA	MULTISPECIES: transketolase	RP01	Chromosome	Chromosome	+	521446	522288	843	MULTISPECIES: transketolase	PUTATIVE PSEUDOGENE: RecName: Full=Putative transketolase N-terminal section; Short=TK [Methanocaldococcus jannaschii DSM 2661]	PF00456;PF13292;PF00676;PF02775	Transketolase_N;DXP_synthase_N;E1_dh;TPP_enzyme_C	Transketolase, thiamine diphosphate binding domain;1-deoxy-D-xylulose-5-phosphate synthase;Dehydrogenase E1 component;Thiamine pyrophosphate enzyme, C-terminal TPP binding domain	COG3959	Transketolase, N-terminal subunit	-	-	K00615	transketolase [EC:2.2.1.1]	2.2.1.1	Transferases; Transferring aldehyde or ketonic groups; Transketolases and transaldolases; sedoheptulose-7-phosphate:D-glyceraldehyde-3-phosphate glycolaldehydetransferase
gene0520	tktA	MULTISPECIES: transketolase family protein	RP01	Chromosome	Chromosome	+	522285	523238	954	MULTISPECIES: transketolase family protein	PUTATIVE PSEUDOGENE: RecName: Full=Putative transketolase C-terminal section; Short=TK [Methanocaldococcus jannaschii DSM 2661]	PF02780;PF02779	Transketolase_C;Transket_pyr	Transketolase, C-terminal domain;Transketolase, pyrimidine binding domain	COG3958	Transketolase, C-terminal subunit	GO:0003824	catalytic activity	K00615	transketolase [EC:2.2.1.1]	2.2.1.1	Transferases; Transferring aldehyde or ketonic groups; Transketolases and transaldolases; sedoheptulose-7-phosphate:D-glyceraldehyde-3-phosphate glycolaldehydetransferase
gene0521	ycsE	MULTISPECIES: Cof-type HAD-IIB family hydrolase	RP01	Chromosome	Chromosome	+	523312	524067	756	MULTISPECIES: Cof-type HAD-IIB family hydrolase	RecName: Full=5-amino-6-(5-phospho-D-ribitylamino)uracil phosphatase YcsE [Bacillus subtilis subsp. subtilis str. 168]	PF08282;PF08282;PF05116;PF00702	Hydrolase_3;Hydrolase_3;S6PP;Hydrolase	haloacid dehalogenase-like hydrolase;haloacid dehalogenase-like hydrolase;Sucrose-6F-phosphate phosphohydrolase;haloacid dehalogenase-like hydrolase	COG0561	Hydroxymethylpyrimidine pyrophosphatase and other HAD family phosphatases	-	-	K21064	5-amino-6-(5-phospho-D-ribitylamino)uracil phosphatase [EC:3.1.3.104]	3.1.3.104	Hydrolases; Acting on ester bonds; Phosphoric-monoester hydrolases; 5-amino-6-(5-phospho-D-ribitylamino)uracil phosphohydrolase
gene0522	pxpA	5-oxoprolinase subunit PxpA	RP01	Chromosome	Chromosome	+	524346	525107	762	5-oxoprolinase subunit PxpA	RecName: Full=5-oxoprolinase subunit A; Short=5-OPase subunit A; AltName: Full=5-oxoprolinase (ATP-hydrolyzing) subunit A [Bacillus licheniformis DSM 13 = ATCC 14580]	PF03746	LamB_YcsF	LamB/YcsF family	COG1540	5-oxoprolinase subunit A	-	-	K07160	5-oxoprolinase (ATP-hydrolysing) subunit A [EC:3.5.2.9]	3.5.2.9	Hydrolases; Acting on carbon-nitrogen bonds, other than peptide bonds; In cyclic amides; 5-oxo-L-proline amidohydrolase (ATP-hydrolysing)
gene0523	-	MULTISPECIES: divalent metal cation transporter	RP01	Chromosome	Chromosome	+	525132	526343	1212	MULTISPECIES: divalent metal cation transporter	RecName: Full=Uncharacterized membrane protein YcsG [Bacillus subtilis subsp. subtilis str. 168]	PF01566	Nramp	Natural resistance-associated macrophage protein	COG1914	Mn2+ or Fe2+ transporter, NRAMP family	-	-	-	-	-	-
gene0524	-	protein YcsI	RP01	Chromosome	Chromosome	+	526340	526990	651	protein YcsI	RecName: Full=Putative hydro-lyase BLi00500/BL02808 [Bacillus licheniformis DSM 13 = ATCC 14580]	PF07286	DUF1445	Protein of unknown function (DUF1445)	COG4336	Uncharacterized conserved protein YcsI, UPF0317/DUF1446 family	-	-	-	-	-	-
gene0525	kipI	MULTISPECIES: 5-oxoprolinase subunit PxpB	RP01	Chromosome	Chromosome	+	527213	527947	735	MULTISPECIES: 5-oxoprolinase subunit PxpB	RecName: Full=5-oxoprolinase subunit B; Short=5-OPase subunit B; AltName: Full=5-oxoprolinase (ATP-hydrolyzing) subunit B; AltName: Full=Antikinase KipI; AltName: Full=Kinase A inhibitor; AltName: Full=Sporulation inhibitor KipI [Bacillus subtilis subsp. subtilis str. 168]	PF02682	CT_C_D	Carboxyltransferase domain, subdomain C and D	COG2049	5-oxoprolinase subunit B/Allophanate hydrolase subunit 1	GO:0005524;GO:0016787	ATP binding;;hydrolase activity	K06351	inhibitor of KinA	-	-
gene0526	kipA	MULTISPECIES: biotin-dependent carboxyltransferase family protein	RP01	Chromosome	Chromosome	+	527944	528957	1014	MULTISPECIES: biotin-dependent carboxyltransferase family protein	RecName: Full=5-oxoprolinase subunit C; Short=5-OPase subunit C; AltName: Full=5-oxoprolinase (ATP-hydrolyzing) subunit C; AltName: Full=KipI antagonist; AltName: Full=Protein KipA [Bacillus subtilis subsp. subtilis str. 168]	PF02626	CT_A_B	Carboxyltransferase domain, subdomain A and B	COG1984	5-oxoprolinase subunit C/Allophanate hydrolase subunit 2	GO:0005524;GO:0016787	ATP binding;;hydrolase activity	K06350	antagonist of KipI	-	-
gene0527	-	MULTISPECIES: IclR family transcriptional regulator	RP01	Chromosome	Chromosome	+	528989	529738	750	MULTISPECIES: IclR family transcriptional regulator	RecName: Full=HTH-type transcriptional regulator KipR; AltName: Full=Kip operon repressor protein [Bacillus subtilis subsp. subtilis str. 168]	PF01614;PF09339	IclR;HTH_IclR	Bacterial transcriptional regulator;IclR helix-turn-helix domain	COG1414	DNA-binding transcriptional regulator, IclR family	GO:0006355;GO:0003677	regulation of transcription, DNA-templated;;DNA binding	-	-	-	-
gene0528	-	MULTISPECIES: GDSL-type esterase/lipase family protein	RP01	Chromosome	Chromosome	+	529827	530465	639	MULTISPECIES: GDSL-type esterase/lipase family protein	RecName: Full=Spore germination lipase LipC [Bacillus licheniformis DSM 13 = ATCC 14580]	PF13472;PF00657	Lipase_GDSL_2;Lipase_GDSL	GDSL-like Lipase/Acylhydrolase family;GDSL-like Lipase/Acylhydrolase	COG2755	Lysophospholipase L1 or related esterase. Includes spore coat protein LipC/YcsK	-	-	-	-	-	-
gene0529	mtlA	PTS mannitol transporter subunit IICB	RP01	Chromosome	Chromosome	+	530738	532162	1425	PTS mannitol transporter subunit IICB	RecName: Full=PTS system mannitol-specific EIICB component; AltName: Full=EIICB-Mtl; Short=EII-Mtl; Includes: RecName: Full=Mannitol permease IIC component; AltName: Full=PTS system mannitol-specific EIIC component; Includes: RecName: Full=Mannitol-specific phosphotransferase enzyme IIB component; AltName: Full=PTS system mannitol-specific EIIB component [Bacillus subtilis subsp. subtilis str. 16…	PF02378;PF02302	PTS_EIIC;PTS_IIB	Phosphotransferase system, EIIC;PTS system, Lactose/Cellobiose specific IIB subunit	COG2213	Phosphotransferase system, mannitol-specific IIBC component	-	-	K02800	mannitol PTS system EIICBA or EIICB component [EC:2.7.1.197]	2.7.1.197	Transferases; Transferring phosphorus-containing groups; Phosphotransferases with an alcohol group as acceptor; protein-Npi-phospho-L-histidine:D-mannitol Npi-phosphotransferase
gene0530	cmtB	MULTISPECIES: PTS sugar transporter subunit IIA	RP01	Chromosome	Chromosome	+	532229	532669	441	MULTISPECIES: PTS sugar transporter subunit IIA	RecName: Full=Mannitol-specific phosphotransferase enzyme IIA component; AltName: Full=EIIA; AltName: Full=EIII; AltName: Full=PTS system mannitol-specific EIIA component [Bacillus subtilis subsp. subtilis str. 168]	PF00359	PTS_EIIA_2	Phosphoenolpyruvate-dependent sugar phosphotransferase system, EIIA 2	COG4668	Mannitol/fructose-specific phosphotransferase system, IIA domain	GO:0008643;GO:0016740	carbohydrate transport;;transferase activity	K02798	mannitol PTS system EIIA component [EC:2.7.1.197]	2.7.1.197	Transferases; Transferring phosphorus-containing groups; Phosphotransferases with an alcohol group as acceptor; protein-Npi-phospho-L-histidine:D-mannitol Npi-phosphotransferase
gene0531	mtlD	mannitol-1-phosphate 5-dehydrogenase	RP01	Chromosome	Chromosome	+	532666	533805	1140	mannitol-1-phosphate 5-dehydrogenase	RecName: Full=Mannitol-1-phosphate 5-dehydrogenase [Bacillus licheniformis DSM 13 = ATCC 14580]	PF08125;PF01232	Mannitol_dh_C;Mannitol_dh	Mannitol dehydrogenase C-terminal domain;Mannitol dehydrogenase Rossmann domain	COG0246	Mannitol-1-phosphate/altronate dehydrogenases	GO:0019594;GO:0008926	mannitol metabolic process;;mannitol-1-phosphate 5-dehydrogenase activity	K00009	mannitol-1-phosphate 5-dehydrogenase [EC:1.1.1.17]	1.1.1.17	Oxidoreductases; Acting on the CH-OH group of donors; With NAD+ or NADP+ as acceptor; D-mannitol-1-phosphate:NAD+ 5-oxidoreductase
gene0532	mtlR	PRD domain-containing protein	RP01	Chromosome	Chromosome	+	534065	536143	2079	PRD domain-containing protein	RecName: Full=Transcriptional regulator MtlR; AltName: Full=Mannitol operon transcriptional activator; Short=Mtl operon transcriptional activator; Includes: RecName: Full=Putative phosphotransferase enzyme IIB component; AltName: Full=Putative PTS system EIIB component; Includes: RecName: Full=Putative phosphotransferase enzyme IIA component; AltName: Full=Putative PTS system EIIA component [Baci…	PF00874;PF00874;PF08279;PF08279;PF05043;PF05043;PF00359;PF02302	PRD;PRD;HTH_11;HTH_11;Mga;Mga;PTS_EIIA_2;PTS_IIB	PRD domain;PRD domain;HTH domain;HTH domain;Mga helix-turn-helix domain;Mga helix-turn-helix domain;Phosphoenolpyruvate-dependent sugar phosphotransferase system, EIIA 2;PTS system, Lactose/Cellobiose specific IIB subunit	COG1762	Phosphotransferase system mannitol/fructose-specific IIA domain (Ntr-type)	GO:0006355;GO:0009401;GO:0008982	regulation of transcription, DNA-templated;;phosphoenolpyruvate-dependent sugar phosphotransferase system;;protein-N(PI)-phosphohistidine-sugar phosphotransferase activity	K03483	mannitol operon transcriptional antiterminator	-	-
gene0533	-	SDR family oxidoreductase	RP01	Chromosome	Chromosome	+	536254	537123	870	SDR family oxidoreductase	RecName: Full=General stress protein 39; Short=GSP39 [Bacillus subtilis subsp. subtilis str. 168]	PF13561;PF00106;PF08659	adh_short_C2;adh_short;KR	Enoyl-(Acyl carrier protein) reductase;short chain dehydrogenase;KR domain	COG1028	NAD(P)-dependent dehydrogenase, short-chain alcohol dehydrogenase family	GO:0016491	oxidoreductase activity	-	-	-	-
gene0534	lyxA	MULTISPECIES: D-lyxose/D-mannose family sugar isomerase	RP01	Chromosome	Chromosome	+	537139	537642	504	MULTISPECIES: D-lyxose/D-mannose family sugar isomerase	RecName: Full=Probable D-lyxose ketol-isomerase [Bacillus subtilis subsp. subtilis str. 168]	PF07385	Lyx_isomer	D-lyxose isomerase	COG3822	D-lyxose ketol-isomerase	GO:0016853	isomerase activity	K09988	D-lyxose ketol-isomerase [EC:5.3.1.15]	5.3.1.15	Isomerases; Intramolecular oxidoreductases; Interconverting aldoses and ketoses, and related compounds; D-lyxose aldose-ketose-isomerase
gene0535	-	MULTISPECIES: DUF2283 domain-containing protein	RP01	Chromosome	Chromosome	-	538042	537659	384	MULTISPECIES: DUF2283 domain-containing protein	-	PF10049	DUF2283	Protein of unknown function (DUF2283)	COG5428	Predicted antitoxin component YuzE of a toxin-antitoxin system, DUF2283 family	-	-	-	-	-	-
gene0536	-	MULTISPECIES: pyridoxamine 5'-phosphate oxidase family protein	RP01	Chromosome	Chromosome	+	538127	538549	423	MULTISPECIES: pyridoxamine 5'-phosphate oxidase family protein	RecName: Full=General stress protein 26; Short=GSP26 [Bacillus subtilis subsp. subtilis str. 168]	PF16242;PF01243	Pyrid_ox_like;Putative_PNPOx	Pyridoxamine 5'-phosphate oxidase like;Pyridoxamine 5'-phosphate oxidase	COG3871	General stress protein 26 (function unknown)	-	-	-	-	-	-
gene0537	-	MULTISPECIES: lipid II flippase Amj family protein	RP01	Chromosome	Chromosome	+	539001	539810	810	MULTISPECIES: lipid II flippase Amj family protein	RecName: Full=Lipid II flippase Amj [Bacillus subtilis subsp. subtilis str. 168]	PF10997	Amj	Alternate to MurJ	-	-	GO:0008360;GO:0071555;GO:0009252;GO:0005887;GO:0015648	regulation of cell shape;;cell wall organization;;peptidoglycan biosynthetic process;;integral component of plasma membrane;;lipid-linked peptidoglycan transporter activity	-	-	-	-
gene0538	tagT_U_V	MULTISPECIES: LCP family protein	RP01	Chromosome	Chromosome	+	539975	540916	942	MULTISPECIES: LCP family protein	RecName: Full=Regulatory protein MsrR [Staphylococcus aureus subsp. aureus COL] >lcl|Q6G9J7.1 RecName: Full=Regulatory protein MsrR [Staphylococcus aureus subsp. aureus MSSA476] >lcl|Q6GH43.1 RecName: Full=Regulatory protein MsrR [Staphylococcus aureus subsp. aureus MRSA252] >lcl|Q7A0Y4.1 RecName: Full=Regulatory protein MsrR [Staphylococcus aureus subsp. aureus MW2] >lcl|Q7BHL7.1 RecName: Full=R…	PF03816	LytR_cpsA_psr	LytR_cpsA_psr family	COG1316	Anionic cell wall polymer biosynthesis enzyme TagV/TagU, LytR-Cps2A-Psr (LCP) family (peptidoglycan teichoic acid transferase)	GO:0071555;GO:0016021	cell wall organization;;integral component of membrane	K01005	polyisoprenyl-teichoic acid--peptidoglycan teichoic acid transferase [EC:2.7.8.-]	-	-
gene0539	-	MULTISPECIES: DUF3817 domain-containing protein	RP01	Chromosome	Chromosome	-	541241	540948	294	MULTISPECIES: DUF3817 domain-containing protein	RecName: Full=Uncharacterized membrane protein YdzA [Bacillus subtilis subsp. subtilis str. 168]	PF12823	DUF3817	Domain of unknown function (DUF3817)	COG2814	Predicted arabinose efflux permease AraJ, MFS family	GO:0016021;GO:0005886	integral component of membrane;;plasma membrane	-	-	-	-
gene0540	-	MULTISPECIES: carboxymuconolactone decarboxylase family protein	RP01	Chromosome	Chromosome	-	541736	541326	411	MULTISPECIES: carboxymuconolactone decarboxylase family protein	-	-	-	-	COG2128	Alkylhydroperoxidase family enzyme, contains CxxC motif	GO:0004601	peroxidase activity	-	-	-	-
gene0541	lrp	MULTISPECIES: Lrp/AsnC family transcriptional regulator	RP01	Chromosome	Chromosome	+	541854	542282	429	MULTISPECIES: Lrp/AsnC family transcriptional regulator	RecName: Full=HTH-type transcriptional regulator LrpC [Bacillus subtilis subsp. subtilis str. 168]	PF01037;PF13404;PF13412;PF01047	AsnC_trans_reg;HTH_AsnC-type;HTH_24;MarR	Lrp/AsnC ligand binding domain;AsnC-type helix-turn-helix domain;Winged helix-turn-helix DNA-binding;MarR family	COG1522	DNA-binding transcriptional regulator, Lrp family	GO:0043565	sequence-specific DNA binding	K03719	Lrp/AsnC family transcriptional regulator, leucine-responsive regulatory protein	-	-
gene0542	topB	DNA topoisomerase III	RP01	Chromosome	Chromosome	+	542323	544536	2214	DNA topoisomerase III	RecName: Full=DNA topoisomerase 3; AltName: Full=DNA topoisomerase III [Bacillus licheniformis DSM 13 = ATCC 14580]	PF01131;PF01751	Topoisom_bac;Toprim	DNA topoisomerase;Toprim domain	COG0550	DNA topoisomerase IA	-	-	K03169	DNA topoisomerase III [EC:5.6.2.1]	5.6.2.1	Isomerases; Isomerases altering macromolecular conformation; Enzymes altering nucleic acid conformation; DNA topoisomerase
gene0543	cmlC	MULTISPECIES: prephenate dehydrogenase/arogenate dehydrogenase family protein	RP01	Chromosome	Chromosome	-	545612	544695	918	MULTISPECIES: prephenate dehydrogenase/arogenate dehydrogenase family protein	RecName: Full=4-amino-4-deoxyprephenate dehydrogenase [Streptomyces pristinaespiralis]	PF02153	PDH	Prephenate dehydrogenase	COG0287	Prephenate dehydrogenase	-	-	K24002	4-amino-4-deoxyprephenate dehydrogenase [EC:1.3.1.121]	1.3.1.121	Oxidoreductases; Acting on the CH-CH group of donors; With NAD+ or NADP+ as acceptor; 4-amino-4-deoxyprephenate:NAD+ oxidoreductase (decarboxylating)
gene0544	pabAB	MULTISPECIES: aminodeoxychorismate synthase component I	RP01	Chromosome	Chromosome	-	547705	545609	2097	MULTISPECIES: aminodeoxychorismate synthase component I	RecName: Full=Aminodeoxychorismate synthase; Short=ADC synthase; AltName: Full=4-amino-4-deoxychorismate synthase; AltName: Full=p-aminobenzoate synthase [Streptomyces venezuelae ATCC 10712]	PF00425;PF00117;PF04715;PF07722	Chorismate_bind;GATase;Anth_synt_I_N;Peptidase_C26	chorismate binding enzyme;Glutamine amidotransferase class-I;Anthranilate synthase component I, N terminal region;Peptidase C26	COG0147	Anthranilate/para-aminobenzoate synthases component I	-	-	K13950	para-aminobenzoate synthetase [EC:2.6.1.85]	2.6.1.85	Transferases; Transferring nitrogenous groups; Transaminases; chorismate:L-glutamine aminotransferase
gene0545	cmlD	MULTISPECIES: chorismate mutase family protein	RP01	Chromosome	Chromosome	-	548063	547674	390	MULTISPECIES: chorismate mutase family protein	RecName: Full=4-amino-4-deoxychorismate mutase; Short=ADC mutase [Streptomyces venezuelae ATCC 10712]	PF01817	CM_2	Chorismate mutase type II	COG1605	Chorismate mutase	-	-	K23874	4-amino-4-deoxychorismate mutase [EC:5.4.99.67]	5.4.99.67	Isomerases; Intramolecular transferases; Transferring other groups; 4-amino-4-deoxychorismate pyruvatemutase
gene0546	poxL	MULTISPECIES: pyruvate oxidase	RP01	Chromosome	Chromosome	+	549059	550780	1722	MULTISPECIES: pyruvate oxidase	RecName: Full=Putative thiamine pyrophosphate-containing protein YdaP [Bacillus subtilis subsp. subtilis str. 168]	PF02776;PF02775;PF00205	TPP_enzyme_N;TPP_enzyme_C;TPP_enzyme_M	Thiamine pyrophosphate enzyme, N-terminal TPP binding domain;Thiamine pyrophosphate enzyme, C-terminal TPP binding domain;Thiamine pyrophosphate enzyme, central domain	COG0028	Acetolactate synthase large subunit or other thiamine pyrophosphate-requiring enzyme	GO:0000287;GO:0003824;GO:0030976	magnesium ion binding;;catalytic activity;;thiamine pyrophosphate binding	K00158	pyruvate oxidase [EC:1.2.3.3]	1.2.3.3	Oxidoreductases; Acting on the aldehyde or oxo group of donors; With oxygen as acceptor; pyruvate:oxygen 2-oxidoreductase (phosphorylating)
gene0547	-	MULTISPECIES: lytic polysaccharide monooxygenase	RP01	Chromosome	Chromosome	+	550919	551530	612	MULTISPECIES: lytic polysaccharide monooxygenase	RecName: Full=GlcNAc-binding protein A; Flags: Precursor [Shewanella oneidensis MR-1]	PF03067	LPMO_10	Lytic polysaccharide mono-oxygenase, cellulose-degrading	COG3397	Predicted carbohydrate-binding protein, contains CBM5 and CBM33 domains	-	-	-	-	-	-
gene0548	-	MULTISPECIES: hypothetical protein	RP01	Chromosome	Chromosome	-	551895	551644	252	MULTISPECIES: hypothetical protein	RecName: Full=Uncharacterized membrane protein YdzK [Bacillus subtilis subsp. subtilis str. 168]	-	-	-	-	-	GO:0016021	integral component of membrane	-	-	-	-
gene0549	rimL	GNAT family N-acetyltransferase	RP01	Chromosome	Chromosome	-	552518	551967	552	GNAT family N-acetyltransferase	RecName: Full=Putative ribosomal N-acetyltransferase YdaF [Bacillus subtilis subsp. subtilis str. 168]	PF13302;PF13420;PF00583	Acetyltransf_3;Acetyltransf_4;Acetyltransf_1	Acetyltransferase (GNAT) domain;Acetyltransferase (GNAT) domain;Acetyltransferase (GNAT) family	COG1670	Protein N-acetyltransferase, RimJ/RimL family	GO:0008080	N-acetyltransferase activity	K03817	ribosomal-protein-serine acetyltransferase [EC:2.3.1.-]	-	-
gene0550	mntH	MULTISPECIES: Nramp family divalent metal transporter	RP01	Chromosome	Chromosome	-	553852	552572	1281	MULTISPECIES: Nramp family divalent metal transporter	RecName: Full=Divalent metal cation transporter MntH [Bacillus subtilis subsp. subtilis str. 168]	PF01566	Nramp	Natural resistance-associated macrophage protein	COG1914	Mn2+ or Fe2+ transporter, NRAMP family	GO:0016021;GO:0005886;GO:0046872;GO:0015293;GO:0046873	integral component of membrane;;plasma membrane;;metal ion binding;;symporter activity;;metal ion transmembrane transporter activity	K03322	manganese transport protein	-	-
gene0551	-	MULTISPECIES: GlsB/YeaQ/YmgE family stress response membrane protein	RP01	Chromosome	Chromosome	-	554295	554035	261	MULTISPECIES: GlsB/YeaQ/YmgE family stress response membrane protein	RecName: Full=UPF0410 protein YdaS [Bacillus subtilis subsp. subtilis str. 168]	PF04226	Transgly_assoc	Transglycosylase associated protein	COG2261	Uncharacterized membrane protein YeaQ/YmgE, transglycosylase-associated protein family	GO:0016021;GO:0005886	integral component of membrane;;plasma membrane	-	-	-	-
gene0552	aspA	aspartate ammonia-lyase	RP01	Chromosome	Chromosome	-	555811	554390	1422	aspartate ammonia-lyase	RecName: Full=Aspartate ammonia-lyase; Short=Aspartase [Bacillus subtilis subsp. subtilis str. 168]	PF00206;PF10415	Lyase_1;FumaraseC_C	Lyase;Fumarase C C-terminus	COG1027	Aspartate ammonia-lyase	-	-	K01744	aspartate ammonia-lyase [EC:4.3.1.1]	4.3.1.1	Lyases; Carbon-nitrogen lyases; Ammonia-lyases; L-aspartate ammonia-lyase (fumarate-forming)
gene0553	-	Oleandomycin glycosyltransferase	RP01	Chromosome	Chromosome	+	556118	557332	1215	Oleandomycin glycosyltransferase	RecName: Full=Uncharacterized UDP-glucosyltransferase YojK [Bacillus subtilis subsp. subtilis str. 168]	PF00201;PF04101	UDPGT;Glyco_tran_28_C	UDP-glucoronosyl and UDP-glucosyl transferase;Glycosyltransferase family 28 C-terminal domain	COG1819	UDP:flavonoid glycosyltransferase YjiC, YdhE family	-	-	-	-	-	-
gene0554	-	MULTISPECIES: DUF2188 domain-containing protein	RP01	Chromosome	Chromosome	-	557775	557329	447	MULTISPECIES: DUF2188 domain-containing protein	RecName: Full=Uncharacterized protein YdaT [Bacillus subtilis subsp. subtilis str. 168]	PF09954	DUF2188	Uncharacterized protein conserved in bacteria (DUF2188)	COG4876	Uncharacterized conserved protein YdaT	-	-	-	-	-	-
gene0555	-	MULTISPECIES: EcsC family protein	RP01	Chromosome	Chromosome	+	557894	558715	822	MULTISPECIES: EcsC family protein	RecName: Full=Uncharacterized protein YdbA [Bacillus subtilis subsp. subtilis str. 168]	PF12787	EcsC	EcsC protein family	-	-	-	-	-	-	-	-
gene0556	-	Na+/H+ antiporter NhaC family protein	RP01	Chromosome	Chromosome	-	560048	558759	1290	Na+/H+ antiporter NhaC family protein	RecName: Full=Na(+)/H(+) antiporter NhaC; AltName: Full=Sodium/hydrogen antiporter; AltName: Full=Sodium/proton antiporter [Bacillus subtilis subsp. subtilis str. 168]	PF03553;PF03553;PF03606	Na_H_antiporter;Na_H_antiporter;DcuC	Na+/H+ antiporter family;Na+/H+ antiporter family;C4-dicarboxylate anaerobic carrier	COG1757	Na+/H+ antiporter NhaC/MleN	-	-	-	-	-	-
gene0557	-	DUF4937 domain-containing protein	RP01	Chromosome	Chromosome	+	560177	560866	690	DUF4937 domain-containing protein	RecName: Full=Uncharacterized protein YdbB [Bacillus subtilis subsp. subtilis str. 168]	PF16291;PF07883	DUF4937;Cupin_2	Domain of unknown function (DUF4937;Cupin domain	COG0662	Mannose-6-phosphate isomerase, cupin superfamily	-	-	-	-	-	-
gene0558	-	glucose starvation-inducible protein B	RP01	Chromosome	Chromosome	+	560968	561408	441	glucose starvation-inducible protein B	RecName: Full=Glucose starvation-inducible protein B; AltName: Full=General stress protein B [Bacillus subtilis subsp. subtilis str. 168]	PF10685;PF10685;PF10685;PF10685;PF10685	KGG;KGG;KGG;KGG;KGG	Stress-induced bacterial acidophilic repeat motif;Stress-induced bacterial acidophilic repeat motif;Stress-induced bacterial acidophilic repeat motif;Stress-induced bacterial acidophilic repeat motif;Stress-induced bacterial acidophilic repeat motif	COG3729	General stress protein YciG, contains tandem KGG domains	-	-	K06884	uncharacterized protein	-	-
gene0559	-	AI-2E family transporter	RP01	Chromosome	Chromosome	+	561832	562872	1041	AI-2E family transporter	RecName: Full=Putative transport protein YdbI [Bacillus subtilis subsp. subtilis str. 168]	PF01594	AI-2E_transport	AI-2E family transporter	COG0628	Predicted PurR-regulated permease PerM	GO:0016021	integral component of membrane	-	-	-	-
gene0560	-	MULTISPECIES: dicarboxylate/amino acid:cation symporter	RP01	Chromosome	Chromosome	+	563160	564404	1245	MULTISPECIES: dicarboxylate/amino acid:cation symporter	RecName: Full=Glutamate transporter homolog; Short=Glt(Ph); AltName: Full=Sodium-aspartate symporter Glt(Ph); AltName: Full=Sodium-dependent aspartate transporter [Pyrococcus horikoshii OT3]	PF00375	SDF	Sodium:dicarboxylate symporter family	COG1301	Na+/H+-dicarboxylate symporter	GO:0016021;GO:0015293	integral component of membrane;;symporter activity	-	-	-	-
gene0561	-	ABC transporter ATP-binding protein	RP01	Chromosome	Chromosome	+	564474	565400	927	ABC transporter ATP-binding protein	RecName: Full=Uncharacterized ABC transporter ATP-binding protein YdbJ [Bacillus subtilis subsp. subtilis str. 168]	PF00005;PF13304	ABC_tran;AAA_21	ABC transporter;AAA domain, putative AbiEii toxin, Type IV TA system	COG1131	ABC-type multidrug transport system, ATPase component	GO:0005524;GO:0042626	ATP binding;;ATPase-coupled transmembrane transporter activity	K01990	ABC-2 type transport system ATP-binding protein	-	-
gene0562	-	MULTISPECIES: ABC transporter permease	RP01	Chromosome	Chromosome	+	565393	566160	768	MULTISPECIES: ABC transporter permease	RecName: Full=Uncharacterized membrane protein YdbK [Bacillus subtilis subsp. subtilis str. 168]	PF12730;PF12679	ABC2_membrane_4;ABC2_membrane_2	ABC-2 family transporter protein;ABC-2 family transporter protein	COG1277	ABC-type transport system involved in multi-copper enzyme maturation, permease component	GO:0016021	integral component of membrane	K01992	ABC-2 type transport system permease protein	-	-
gene0563	-	YdbL	RP01	Chromosome	Chromosome	+	566264	566620	357	YdbL	RecName: Full=Uncharacterized protein YdbL [Bacillus subtilis subsp. subtilis str. 168]	-	-	-	-	-	GO:0016021	integral component of membrane	-	-	-	-
gene0564	-	MULTISPECIES: acyl-CoA/acyl-ACP dehydrogenase	RP01	Chromosome	Chromosome	+	566745	567893	1149	MULTISPECIES: acyl-CoA/acyl-ACP dehydrogenase	RecName: Full=Putative acyl-CoA dehydrogenase YdbM [Bacillus subtilis subsp. subtilis str. 168]	PF08028;PF00441;PF02770;PF02771	Acyl-CoA_dh_2;Acyl-CoA_dh_1;Acyl-CoA_dh_M;Acyl-CoA_dh_N	Acyl-CoA dehydrogenase, C-terminal domain;Acyl-CoA dehydrogenase, C-terminal domain;Acyl-CoA dehydrogenase, middle domain;Acyl-CoA dehydrogenase, N-terminal domain	COG1960	Acyl-CoA dehydrogenase related to the alkylation response protein AidB	GO:0050660;GO:0016627	flavin adenine dinucleotide binding;;oxidoreductase activity, acting on the CH-CH group of donors	-	-	-	-
gene0565	-	MULTISPECIES: Fur-regulated basic protein FbpB	RP01	Chromosome	Chromosome	-	568085	567930	156	MULTISPECIES: Fur-regulated basic protein FbpB	RecName: Full=Uncharacterized protein YdbN [Bacillus subtilis subsp. subtilis str. 168]	PF13040	Fur_reg_FbpB	Fur-regulated basic protein B	-	-	-	-	-	-	-	-
gene0566	-	MULTISPECIES: Fur-regulated basic protein FbpA	RP01	Chromosome	Chromosome	-	568246	568088	159	MULTISPECIES: Fur-regulated basic protein FbpA	-	PF13076	Fur_reg_FbpA	Fur-regulated basic protein A	-	-	GO:0016301	kinase activity	-	-	-	-
gene0567	-	MULTISPECIES: thioredoxin family protein	RP01	Chromosome	Chromosome	-	568980	568660	321	MULTISPECIES: thioredoxin family protein	RecName: Full=Thioredoxin-like protein YdbP [Bacillus subtilis subsp. subtilis str. 168]	PF00085;PF14595;PF07449	Thioredoxin;Thioredoxin_9;HyaE	Thioredoxin;Thioredoxin;Hydrogenase-1 expression protein HyaE	COG3118	Chaperedoxin CnoX, contains thioredoxin-like and TPR-like domains, YbbN/TrxSC family	-	-	-	-	-	-
gene0568	ddl	MULTISPECIES: D-alanine--D-alanine ligase	RP01	Chromosome	Chromosome	+	569141	570226	1086	MULTISPECIES: D-alanine--D-alanine ligase	RecName: Full=D-alanine--D-alanine ligase; AltName: Full=D-Ala-D-Ala ligase; AltName: Full=D-alanylalanine synthetase [Bacillus licheniformis DSM 13 = ATCC 14580]	PF07478;PF01820;PF02222;PF02786	Dala_Dala_lig_C;Dala_Dala_lig_N;ATP-grasp;CPSase_L_D2	D-ala D-ala ligase C-terminus;D-ala D-ala ligase N-terminus;ATP-grasp domain;Carbamoyl-phosphate synthase L chain, ATP binding domain	COG1181	D-alanine-D-alanine ligase or related ATP-grasp enzyme	GO:0008360;GO:0071555;GO:0009252;GO:0005737;GO:0005524;GO:0046872;GO:0008716	regulation of cell shape;;cell wall organization;;peptidoglycan biosynthetic process;;cytoplasm;;ATP binding;;metal ion binding;;D-alanine-D-alanine ligase activity	K01921	D-alanine-D-alanine ligase [EC:6.3.2.4]	6.3.2.4	Ligases; Forming carbon-nitrogen bonds; Acid-D-amino-acid ligases (peptide synthases); D-alanine:D-alanine ligase (ADP-forming)
gene0569	murF	MULTISPECIES: UDP-N-acetylmuramoyl-tripeptide--D-alanyl-D-alanine ligase	RP01	Chromosome	Chromosome	+	570343	571713	1371	MULTISPECIES: UDP-N-acetylmuramoyl-tripeptide--D-alanyl-D-alanine ligase	RecName: Full=UDP-N-acetylmuramoyl-tripeptide--D-alanyl-D-alanine ligase; AltName: Full=D-alanyl-D-alanine-adding enzyme; AltName: Full=UDP-MurNAc-pentapeptide synthetase [Bacillus subtilis subsp. subtilis str. 168]	PF08245;PF02875;PF01225	Mur_ligase_M;Mur_ligase_C;Mur_ligase	Mur ligase middle domain;Mur ligase family, glutamate ligase domain;Mur ligase family, catalytic domain	COG0770	UDP-N-acetylmuramyl pentapeptide synthase	GO:0051301;GO:0008360;GO:0071555;GO:0009252;GO:0007049;GO:0005737;GO:0005524;GO:0047480	cell division;;regulation of cell shape;;cell wall organization;;peptidoglycan biosynthetic process;;cell cycle;;cytoplasm;;ATP binding;;UDP-N-acetylmuramoyl-tripeptide-D-alanyl-D-alanine ligase activity	K01929	UDP-N-acetylmuramoyl-tripeptide--D-alanyl-D-alanine ligase [EC:6.3.2.10]	6.3.2.10	Ligases; Forming carbon-nitrogen bonds; Acid-D-amino-acid ligases (peptide synthases); UDP-N-acetylmuramoyl-L-alanyl-D-glutamyl-L-lysine:D-alanyl-D-alanine ligase (ADP-forming)
gene0570	yvaK	Carboxylesterase	RP01	Chromosome	Chromosome	+	571827	572489	663	Carboxylesterase	RecName: Full=Thermostable monoacylglycerol lipase; Short=MGLP; Short=bMGL [Bacillus sp. H-257]	PF12146;PF00561;PF12697;PF03959	Hydrolase_4;Abhydrolase_1;Abhydrolase_6;FSH1	Serine aminopeptidase, S33;alpha/beta hydrolase fold;Alpha/beta hydrolase family;Serine hydrolase (FSH1)	COG1647	Esterase/lipase	GO:0052689	carboxylic ester hydrolase activity	K03928	carboxylesterase [EC:3.1.1.1]	3.1.1.1	Hydrolases; Acting on ester bonds; Carboxylic-ester hydrolases; carboxylic-ester hydrolase
gene0571	deaD	DEAD/DEAH box helicase	RP01	Chromosome	Chromosome	+	572825	574288	1464	DEAD/DEAH box helicase	RecName: Full=DEAD-box ATP-dependent RNA helicase CshA [Bacillus licheniformis DSM 13 = ATCC 14580]	PF00270;PF00271;PF04851	DEAD;Helicase_C;ResIII	DEAD/DEAH box helicase;Helicase conserved C-terminal domain;Type III restriction enzyme, res subunit	COG0513	Superfamily II DNA and RNA helicase	GO:0006401;GO:0010501;GO:0005737;GO:0005524;GO:0016787;GO:0003723;GO:0003724	RNA catabolic process;;RNA secondary structure unwinding;;cytoplasm;;ATP binding;;hydrolase activity;;RNA binding;;RNA helicase activity	K05592	ATP-dependent RNA helicase DeaD [EC:3.6.4.13]	3.6.4.13	Hydrolases; Acting on acid anhydrides; Acting on acid anhydrides to facilitate cellular and subcellular movement; ATP phosphohydrolase (RNA helix unwinding)
gene0572	-	MULTISPECIES: PH domain-containing protein	RP01	Chromosome	Chromosome	+	574401	574880	480	MULTISPECIES: PH domain-containing protein	RecName: Full=UPF0699 transmembrane protein YdbS [Bacillus subtilis subsp. subtilis str. 168]	PF03703	bPH_2	Bacterial PH domain	COG3402	Uncharacterized membrane protein YdbS, contains bPH2 (bacterial pleckstrin homology) domain	GO:0016021	integral component of membrane	K09167	uncharacterized protein	-	-
gene0573	-	PH domain-containing protein	RP01	Chromosome	Chromosome	+	574870	576354	1485	PH domain-containing protein	RecName: Full=UPF0699 transmembrane protein YdbT [Bacillus subtilis subsp. subtilis str. 168]	PF03703;PF03703;PF03703	bPH_2;bPH_2;bPH_2	Bacterial PH domain;Bacterial PH domain;Bacterial PH domain	COG3428	Uncharacterized membrane protein YdbT, contains bPH2 (bacterial pleckstrin homology) domain	-	-	K08981	putative membrane protein	-	-
gene0574	gluP	MULTISPECIES: rhomboid family intramembrane serine protease	RP01	Chromosome	Chromosome	-	576950	576351	600	MULTISPECIES: rhomboid family intramembrane serine protease	RecName: Full=Putative rhomboid protease YdcA [Bacillus subtilis subsp. subtilis str. 168]	PF01694	Rhomboid	Rhomboid family	COG0705	Membrane-associated serine protease, rhomboid family	GO:0016021;GO:0004252	integral component of membrane;;serine-type endopeptidase activity	K19225	rhomboid protease GluP [EC:3.4.21.105]	3.4.21.105	Hydrolases; Acting on peptide bonds (peptidases); Serine endopeptidases; rhomboid protease
gene0575	-	DUF4367 domain-containing protein	RP01	Chromosome	Chromosome	+	577246	578253	1008	DUF4367 domain-containing protein	RecName: Full=Sporulation protein YdcC [Bacillus subtilis subsp. subtilis str. 168]	PF14285	DUF4367	Domain of unknown function (DUF4367)	COG2834	Outer membrane lipoprotein-sorting protein	-	-	-	-	-	-
gene0576	alr	alanine racemase	RP01	Chromosome	Chromosome	+	578475	579647	1173	alanine racemase	RecName: Full=Alanine racemase 1 [Bacillus subtilis subsp. subtilis str. 168]	PF01168;PF00842	Ala_racemase_N;Ala_racemase_C	Alanine racemase, N-terminal domain;Alanine racemase, C-terminal domain	COG0787	Alanine racemase	-	-	K01775	alanine racemase [EC:5.1.1.1]	5.1.1.1	Isomerases; Racemases and epimerases; Acting on amino acids and derivatives; alanine racemase
gene0577	ndoAI	MULTISPECIES: hypothetical protein	RP01	Chromosome	Chromosome	+	579759	580040	282	MULTISPECIES: hypothetical protein	RecName: Full=Antitoxin EndoAI; AltName: Full=Antitoxin MazE-bs; Short=MazE-bs; AltName: Full=EndoA inhibitor [Bacillus subtilis subsp. subtilis str. 168]	-	-	-	COG0864	Metal-responsive transcriptional regulator, contains CopG/Arc/MetJ DNA-binding domain	GO:0006355	regulation of transcription, DNA-templated	K07723	CopG family transcriptional regulator / antitoxin EndoAI	-	-
gene0578	mazF	MULTISPECIES: type II toxin-antitoxin system endoribonuclease NdoA	RP01	Chromosome	Chromosome	+	580045	580395	351	MULTISPECIES: type II toxin-antitoxin system endoribonuclease NdoA	RecName: Full=Endoribonuclease EndoA; AltName: Full=Toxin EndoA; AltName: Full=mRNA interferase EndoA; AltName: Full=mRNA interferase MazF-bs; Short=MazF-bs [Bacillus subtilis subsp. subtilis str. 168]	PF02452	PemK_toxin	PemK-like, MazF-like toxin of type II toxin-antitoxin system	COG2337	mRNA-degrading endonuclease MazF, toxin component of the MazEF toxin-antitoxin module	GO:0006402;GO:0016075;GO:0003677;GO:0003723;GO:0004521;GO:0004519	mRNA catabolic process;;rRNA catabolic process;;DNA binding;;RNA binding;;endoribonuclease activity;;endonuclease activity	K07171	mRNA interferase MazF [EC:3.1.-.-]	-	-
gene0579	rsbR	MULTISPECIES: RsbT co-antagonist protein RsbRA	RP01	Chromosome	Chromosome	+	580513	581340	828	MULTISPECIES: RsbT co-antagonist protein RsbRA	RecName: Full=RsbT co-antagonist protein RsbRA; AltName: Full=Stressosome protein RsbRA [Bacillus subtilis subsp. subtilis str. 168]	PF08678;PF01740	Rsbr_N;STAS	Rsbr N terminal;STAS domain	COG1366	Anti-anti-sigma regulatory factor (antagonist of anti-sigma factor)	GO:0020037;GO:0019825	heme binding;;oxygen binding	K17763	rsbT co-antagonist protein RsbR	-	-
gene0580	rsbS	MULTISPECIES: STAS domain-containing protein	RP01	Chromosome	Chromosome	+	581344	581709	366	MULTISPECIES: STAS domain-containing protein	RecName: Full=RsbT antagonist protein RsbS; AltName: Full=Stressosome protein RsbS [Bacillus subtilis subsp. subtilis str. 168]	PF01740	STAS	STAS domain	COG1366	Anti-anti-sigma regulatory factor (antagonist of anti-sigma factor)	-	-	K17762	rsbT antagonist protein RsbS	-	-
gene0581	rsbT	MULTISPECIES: anti-sigma regulatory factor	RP01	Chromosome	Chromosome	+	581712	582113	402	MULTISPECIES: anti-sigma regulatory factor	RecName: Full=Serine/threonine-protein kinase RsbT; AltName: Full=Anti-sigma-B factor RsbT; AltName: Full=Switch protein/serine kinase [Bacillus subtilis subsp. subtilis str. 168]	PF02518;PF13581	HATPase_c;HATPase_c_2	Histidine kinase-, DNA gyrase B-, and HSP90-like ATPase;Histidine kinase-like ATPase domain	COG2172	Anti-sigma regulatory factor (Ser/Thr protein kinase)	GO:0005524;GO:0016301;GO:0004674	ATP binding;;kinase activity;;protein serine/threonine kinase activity	K17752	serine/threonine-protein kinase RsbT [EC:2.7.11.1]	2.7.11.1	Transferases; Transferring phosphorus-containing groups; Protein-serine/threonine kinases; ATP:protein phosphotransferase (non-specific)
gene0582	rsbU_P	MULTISPECIES: PP2C family protein-serine/threonine phosphatase	RP01	Chromosome	Chromosome	+	582124	583131	1008	MULTISPECIES: PP2C family protein-serine/threonine phosphatase	RecName: Full=Phosphoserine phosphatase RsbU; AltName: Full=Sigma factor SigB regulation protein RsbU [Bacillus subtilis subsp. subtilis str. 168]	PF07228;PF08673	SpoIIE;RsbU_N	Stage II sporulation protein E (SpoIIE);Phosphoserine phosphatase RsbU, N-terminal domain	COG2208	Phosphoserine phosphatase RsbU, regulator of sigma subunit	GO:0006468;GO:0016791	protein phosphorylation;;phosphatase activity	K07315	phosphoserine phosphatase RsbU/P [EC:3.1.3.3]	3.1.3.3	Hydrolases; Acting on ester bonds; Phosphoric-monoester hydrolases; O-phosphoserine phosphohydrolase
gene0583	rsbV	MULTISPECIES: anti-sigma factor antagonist	RP01	Chromosome	Chromosome	+	583190	583516	327	MULTISPECIES: anti-sigma factor antagonist	RecName: Full=Anti-sigma-B factor antagonist; AltName: Full=Anti-anti-sigma-B factor [Bacillus licheniformis]	PF01740;PF13466	STAS;STAS_2	STAS domain;STAS domain	COG5815	Stage II sporulation protein SpoIIAA (antagonist of anti-sigma F factor)	GO:0043856	anti-sigma factor antagonist activity	K04749	anti-sigma B factor antagonist	-	-
gene0584	rsbW	MULTISPECIES: anti-sigma B factor RsbW	RP01	Chromosome	Chromosome	+	583516	583998	483	MULTISPECIES: anti-sigma B factor RsbW	RecName: Full=Serine-protein kinase RsbW; AltName: Full=Anti-sigma-B factor; AltName: Full=Sigma-B negative effector RsbW [Bacillus licheniformis]	PF13581;PF02518	HATPase_c_2;HATPase_c	Histidine kinase-like ATPase domain;Histidine kinase-, DNA gyrase B-, and HSP90-like ATPase	COG2172	Anti-sigma regulatory factor (Ser/Thr protein kinase)	GO:0005524;GO:0106310;GO:0016989	ATP binding;;protein serine kinase activity;;sigma factor antagonist activity	K04757	serine/threonine-protein kinase RsbW [EC:2.7.11.1]	2.7.11.1	Transferases; Transferring phosphorus-containing groups; Protein-serine/threonine kinases; ATP:protein phosphotransferase (non-specific)
gene0585	sigB	MULTISPECIES: RNA polymerase sigma factor SigB	RP01	Chromosome	Chromosome	+	583964	584755	792	MULTISPECIES: RNA polymerase sigma factor SigB	RecName: Full=RNA polymerase sigma-B factor; AltName: Full=General stress protein 84; Short=GSP84; AltName: Full=Sigma-37 [Bacillus subtilis subsp. subtilis str. 168]	PF04545;PF04539;PF04542;PF08281	Sigma70_r4;Sigma70_r3;Sigma70_r2;Sigma70_r4_2	Sigma-70, region 4;Sigma-70 region 3;Sigma-70 region 2;Sigma-70, region 4	COG1191	DNA-directed RNA polymerase specialized sigma subunit	GO:0006352;GO:0003677;GO:0016987	DNA-templated transcription, initiation;;DNA binding;;sigma factor activity	K03090	RNA polymerase sigma-B factor	-	-
gene0586	rsbX	MULTISPECIES: SpoIIE family protein phosphatase	RP01	Chromosome	Chromosome	+	584752	585351	600	MULTISPECIES: SpoIIE family protein phosphatase	RecName: Full=Phosphoserine phosphatase RsbX; AltName: Full=Sigma-B negative effector [Bacillus subtilis subsp. subtilis str. 168]	PF07228	SpoIIE	Stage II sporulation protein E (SpoIIE)	COG2208	Phosphoserine phosphatase RsbU, regulator of sigma subunit	GO:0016791	phosphatase activity	K05518	phosphoserine phosphatase RsbX [EC:3.1.3.3]	3.1.3.3	Hydrolases; Acting on ester bonds; Phosphoric-monoester hydrolases; O-phosphoserine phosphohydrolase
gene0587	tex	MULTISPECIES: RNA-binding transcriptional accessory protein	RP01	Chromosome	Chromosome	+	585429	587591	2163	MULTISPECIES: RNA-binding transcriptional accessory protein	RecName: Full=Uncharacterized protein YdcI [Bacillus subtilis subsp. subtilis str. 168]	PF09371;PF16921;PF12836;PF17674;PF00575;PF14639;PF14635	Tex_N;Tex_YqgF;HHH_3;HHH_9;S1;YqgF;HHH_7	Tex-like protein N-terminal domain;Tex protein YqgF-like domain;Helix-hairpin-helix motif;HHH domain;S1 RNA binding domain;Holliday-junction resolvase-like of SPT6;Helix-hairpin-helix motif	COG2183	Transcriptional accessory protein Tex/SPT6	-	-	K06959	protein Tex	-	-
gene0588	-	MULTISPECIES: TetR/AcrR family transcriptional regulator	RP01	Chromosome	Chromosome	-	588190	587633	558	MULTISPECIES: TetR/AcrR family transcriptional regulator	RecName: Full=Uncharacterized HTH-type transcriptional regulator YxbF [Bacillus subtilis subsp. subtilis str. 168]	PF14278;PF00440	TetR_C_8;TetR_N	Transcriptional regulator C-terminal region;Bacterial regulatory proteins, tetR family	COG1309	DNA-binding protein, AcrR family, includes nucleoid occlusion protein SlmA	GO:0003677	DNA binding	-	-	-	-
gene0589	-	GNAT family acetyltransferase	RP01	Chromosome	Chromosome	+	588344	588967	624	GNAT family acetyltransferase	-	PF00583	Acetyltransf_1	Acetyltransferase (GNAT) family	-	-	GO:0008080	N-acetyltransferase activity	-	-	-	-
gene0590	-	MMPL family transporter	RP01	Chromosome	Chromosome	+	589108	592227	3120	MMPL family transporter	RecName: Full=Putative membrane protein YdgH [Bacillus subtilis subsp. subtilis str. 168]	PF03176;PF03176	MMPL;MMPL	MMPL family;MMPL family	COG2409	Predicted lipid transporter YdfJ, MMPL/SSD domain, RND superfamily	-	-	K06994	putative drug exporter of the RND superfamily	-	-
gene0591	sprL	MULTISPECIES: SprT family protein	RP01	Chromosome	Chromosome	+	592616	593077	462	MULTISPECIES: SprT family protein	RecName: Full=Protein SprT-like [Bacillus licheniformis DSM 13 = ATCC 14580]	PF10263	SprT-like	SprT-like family	COG3091	Predicted Zn-dependent metalloprotease, SprT family	-	-	K03095	SprT-like protein	-	-
gene0599	-	MULTISPECIES: arsinothricin resistance N-acetyltransferase ArsN1	RP01	Chromosome	Chromosome	+	594070	594564	495	MULTISPECIES: arsinothricin resistance N-acetyltransferase ArsN1	RecName: Full=Putative phosphinothricin acetyltransferase YwnH; Short=PPT N-acetyltransferase [Bacillus subtilis subsp. subtilis str. 168]	PF00583;PF13420;PF13508;PF13673;PF13302	Acetyltransf_1;Acetyltransf_4;Acetyltransf_7;Acetyltransf_10;Acetyltransf_3	Acetyltransferase (GNAT) family;Acetyltransferase (GNAT) domain;Acetyltransferase (GNAT) domain;Acetyltransferase (GNAT) domain;Acetyltransferase (GNAT) domain	COG1247	L-amino acid N-acyltransferase MnaT	-	-	-	-	-	-
gene0600	-	putative secreted protein	RP01	Chromosome	Chromosome	-	595891	594596	1296	putative secreted protein	-	PF13738;PF07992;PF13434	Pyr_redox_3;Pyr_redox_2;K_oxygenase	Pyridine nucleotide-disulphide oxidoreductase;Pyridine nucleotide-disulphide oxidoreductase;L-lysine 6-monooxygenase (NADPH-requiring)	COG2072	Predicted flavoprotein CzcO associated with the cation diffusion facilitator CzcD	-	-	-	-	-	-
gene0601	arsR	MULTISPECIES: metalloregulator ArsR/SmtB family transcription factor	RP01	Chromosome	Chromosome	-	596268	595948	321	MULTISPECIES: metalloregulator ArsR/SmtB family transcription factor	RecName: Full=Arsenical resistance operon repressor [Bacillus subtilis subsp. subtilis str. 168]	PF01022;PF12840	HTH_5;HTH_20	Bacterial regulatory protein, arsR family;Helix-turn-helix domain	COG0640	DNA-binding transcriptional regulator, ArsR family	-	-	K03892	ArsR family transcriptional regulator, arsenate/arsenite/antimonite-responsive transcriptional repressor	-	-
gene0602	arsR	MULTISPECIES: metalloregulator ArsR/SmtB family transcription factor	RP01	Chromosome	Chromosome	+	596435	596668	234	MULTISPECIES: metalloregulator ArsR/SmtB family transcription factor	RecName: Full=HTH-type transcriptional repressor AseR [Bacillus subtilis subsp. subtilis str. 168]	PF01022	HTH_5	Bacterial regulatory protein, arsR family	COG0640	DNA-binding transcriptional regulator, ArsR family	-	-	K03892	ArsR family transcriptional regulator, arsenate/arsenite/antimonite-responsive transcriptional repressor	-	-
gene0603	arsB	arsenite/antimonite efflux pump membrane family protein	RP01	Chromosome	Chromosome	+	596793	597722	930	arsenite/antimonite efflux pump membrane family protein	RecName: Full=Putative arsenical pump membrane protein YdfA [Bacillus subtilis subsp. subtilis str. 168]	PF02040;PF03600	ArsB;CitMHS	Arsenical pump membrane protein;Citrate transporter	COG1055	Na+/H+ antiporter NhaD or related arsenite permease	-	-	K03893	arsenical pump membrane protein	-	-
gene0604	arsB	arsenical pump membrane family protein	RP01	Chromosome	Chromosome	+	597667	598092	426	arsenical pump membrane family protein	RecName: Full=Putative arsenical pump membrane protein YdfA [Bacillus subtilis subsp. subtilis str. 168]	PF02040	ArsB	Arsenical pump membrane protein	COG1055	Na+/H+ antiporter NhaD or related arsenite permease	-	-	K03893	arsenical pump membrane protein	-	-
gene0605	arsC	MULTISPECIES: arsenate reductase (thioredoxin)	RP01	Chromosome	Chromosome	+	598114	598533	420	MULTISPECIES: arsenate reductase (thioredoxin)	RecName: Full=Arsenate reductase [Bacillus licheniformis DSM 13 = ATCC 14580]	PF01451	LMWPc	Low molecular weight phosphotyrosine protein phosphatase	COG0394	Protein-tyrosine-phosphatase	-	-	K03741	arsenate reductase (thioredoxin) [EC:1.20.4.4]	1.20.4.4	Oxidoreductases; Acting on phosphorus or arsenic in donors; With disulfide as acceptor; arsenate:thioredoxin oxidoreductase
gene0606	xynA	glycoside hydrolase family 11 protein	RP01	Chromosome	Chromosome	+	599230	599871	642	glycoside hydrolase family 11 protein	RecName: Full=Endo-1,4-beta-xylanase A; Short=Xylanase A; AltName: Full=1,4-beta-D-xylan xylanohydrolase A; Flags: Precursor [Bacillus subtilis subsp. subtilis str. 168]	PF00457	Glyco_hydro_11	Glycosyl hydrolases family 11	COG0726	Peptidoglycan/xylan/chitin deacetylase, PgdA/NodB/CDA1 family	-	-	K01181	endo-1,4-beta-xylanase [EC:3.2.1.8]	3.2.1.8	Hydrolases; Glycosylases; Glycosidases, i.e. enzymes that hydrolyse O- and S-glycosyl compounds; 4-beta-D-xylan xylanohydrolase
gene0607	desA	MULTISPECIES: fatty acid desaturase	RP01	Chromosome	Chromosome	-	601920	600892	1029	MULTISPECIES: fatty acid desaturase	RecName: Full=Fatty acid desaturase; AltName: Full=Delta(5) acyl-lipid desaturase; AltName: Full=Delta(5) desaturase [Bacillus subtilis subsp. subtilis str. 168]	PF00487	FA_desaturase	Fatty acid desaturase	COG3239	Fatty acid desaturase	-	-	K10255	acyl-lipid omega-6 desaturase (Delta-12 desaturase) [EC:1.14.19.23 1.14.19.45]	1.14.19.45;1.14.19.23	Oxidoreductases; Acting on paired donors, with incorporation or reduction of molecular oxygen; With oxidation of a pair of donors resulting in the reduction of O2 to two molecules of water; 1-oleoyl-2-acyl-[glycerolipid],ferredoxin:oxygen oxidoreductase (12,13-cis-dehydrogenating)|Oxidoreductases; Acting on paired donors, with incorporation or reduction of molecular oxygen; With oxidation of a pa…
gene0608	-	hypothetical protein	RP01	Chromosome	Chromosome	+	602180	602323	144	hypothetical protein	-	-	-	-	-	-	-	-	-	-	-	-
gene0609	cspA	MULTISPECIES: cold shock protein CspC	RP01	Chromosome	Chromosome	+	602541	602744	204	MULTISPECIES: cold shock protein CspC	RecName: Full=Cold shock protein CspC [Bacillus subtilis subsp. subtilis str. 168]	PF00313	CSD	'Cold-shock' DNA-binding domain	COG1278	Cold shock protein, CspA family	GO:0005737;GO:0003676	cytoplasm;;nucleic acid binding	K03704	cold shock protein	-	-
gene0610	-	MULTISPECIES: zinc-dependent alcohol dehydrogenase family protein	RP01	Chromosome	Chromosome	-	603984	602998	987	MULTISPECIES: zinc-dependent alcohol dehydrogenase family protein	RecName: Full=Enoyl-[acyl-carrier-protein] reductase, mitochondrial; AltName: Full=2-enoyl thioester reductase; AltName: Full=Nuclear receptor-binding factor 1; Short=NRBF-1; Flags: Precursor [Rattus norvegicus]	PF00107;PF13602;PF08240	ADH_zinc_N;ADH_zinc_N_2;ADH_N	Zinc-binding dehydrogenase;Zinc-binding dehydrogenase;Alcohol dehydrogenase GroES-like domain	COG0604	NADPH:quinone reductase or related Zn-dependent oxidoreductase	-	-	-	-	-	-
gene0611	-	MULTISPECIES: PLP-dependent aminotransferase family protein	RP01	Chromosome	Chromosome	+	604437	605822	1386	MULTISPECIES: PLP-dependent aminotransferase family protein	RecName: Full=Uncharacterized HTH-type transcriptional regulator YdeF [Bacillus subtilis subsp. subtilis str. 168]	PF00155;PF00392;PF01212	Aminotran_1_2;GntR;Beta_elim_lyase	Aminotransferase class I and II;Bacterial regulatory proteins, gntR family;Beta-eliminating lyase	COG1167	DNA-binding transcriptional regulator, MocR family, contains an aminotransferase domain	-	-	-	-	-	-
gene0612	-	permease	RP01	Chromosome	Chromosome	+	605923	607218	1296	permease	RecName: Full=Uncharacterized MFS-type transporter YdeG [Bacillus subtilis subsp. subtilis str. 168]	PF07690;PF07690	MFS_1;MFS_1	Major Facilitator Superfamily;Major Facilitator Superfamily	COG2271	Sugar phosphate permease	-	-	-	-	-	-
gene0613	-	MULTISPECIES: hypothetical protein	RP01	Chromosome	Chromosome	-	608492	607839	654	MULTISPECIES: hypothetical protein	-	-	-	-	-	-	-	-	-	-	-	-
gene0614	-	putative membrane protein	RP01	Chromosome	Chromosome	+	608576	608746	171	putative membrane protein	-	-	-	-	-	-	-	-	-	-	-	-
gene0615	-	MULTISPECIES: YitT family protein	RP01	Chromosome	Chromosome	-	609681	609067	615	MULTISPECIES: YitT family protein	RecName: Full=Uncharacterized protein YyaS [Bacillus subtilis subsp. subtilis str. 168]	-	-	-	COG2364	Uncharacterized membrane protein YczE	-	-	K07149	uncharacterized protein	-	-
gene0616	-	MULTISPECIES: MarR family transcriptional regulator	RP01	Chromosome	Chromosome	+	609791	610243	453	MULTISPECIES: MarR family transcriptional regulator	RecName: Full=Uncharacterized HTH-type transcriptional regulator YybA [Bacillus subtilis subsp. subtilis str. 168]	PF01047;PF01978;PF12802;PF13412	MarR;TrmB;MarR_2;HTH_24	MarR family;Sugar-specific transcriptional regulator TrmB;MarR family;Winged helix-turn-helix DNA-binding	COG1846	DNA-binding transcriptional regulator, MarR family	-	-	-	-	-	-
gene0617	paiA	MULTISPECIES: GNAT family N-acetyltransferase	RP01	Chromosome	Chromosome	+	610269	610787	519	MULTISPECIES: GNAT family N-acetyltransferase	RecName: Full=Spermidine/spermine N(1)-acetyltransferase; Short=SSAT; AltName: Full=Protease synthase and sporulation negative regulatory protein PAI 1; AltName: Full=Spermidine N(1)-acetyltransferase; Short=SAT [Bacillus subtilis subsp. subtilis str. 168]	PF00583;PF13673;PF13508;PF13420;PF08445	Acetyltransf_1;Acetyltransf_10;Acetyltransf_7;Acetyltransf_4;FR47	Acetyltransferase (GNAT) family;Acetyltransferase (GNAT) domain;Acetyltransferase (GNAT) domain;Acetyltransferase (GNAT) domain;FR47-like protein	COG0456	Ribosomal protein S18 acetylase RimI and related acetyltransferases	-	-	K22441	diamine N-acetyltransferase [EC:2.3.1.57]	2.3.1.57	Transferases; Acyltransferases; Transferring groups other than aminoacyl groups; acetyl-CoA:alkane-alpha,omega-diamine N-acetyltransferase
gene0618	paiB	MULTISPECIES: FMN-binding negative transcriptional regulator	RP01	Chromosome	Chromosome	+	610810	611427	618	MULTISPECIES: FMN-binding negative transcriptional regulator	RecName: Full=Protease synthase and sporulation protein PAI 2 [Bacillus subtilis subsp. subtilis str. 168]	PF04299	FMN_bind_2	Putative FMN-binding domain	COG2808	Predicted FMN-binding regulatory protein PaiB	-	-	K07734	transcriptional regulator	-	-
gene0619	rocF	MULTISPECIES: arginase family protein	RP01	Chromosome	Chromosome	-	612610	611696	915	MULTISPECIES: arginase family protein	RecName: Full=Arginase [Staphylococcus aureus subsp. aureus MSSA476] >lcl|Q8NVE3.1 RecName: Full=Arginase [Staphylococcus aureus subsp. aureus MW2]	PF00491	Arginase	Arginase family	COG0010	Arginase/agmatinase family enzyme	-	-	K01476	arginase [EC:3.5.3.1]	3.5.3.1	Hydrolases; Acting on carbon-nitrogen bonds, other than peptide bonds; In linear amidines; L-arginine amidinohydrolase
gene0620	-	MULTISPECIES: helix-turn-helix transcriptional regulator	RP01	Chromosome	Chromosome	+	612716	613051	336	MULTISPECIES: helix-turn-helix transcriptional regulator	RecName: Full=Uncharacterized HTH-type transcriptional regulator BH0655 [Alkalihalobacillus halodurans C-125]	PF01638	HxlR	HxlR-like helix-turn-helix	COG1733	DNA-binding transcriptional regulator, HxlR family	-	-	-	-	-	-
gene0621	-	MULTISPECIES: YitT family protein	RP01	Chromosome	Chromosome	+	613366	614238	873	MULTISPECIES: YitT family protein	RecName: Full=UPF0750 membrane protein YdeO [Bacillus subtilis subsp. subtilis str. 168]	PF02588;PF10035	YitT_membrane;DUF2179	Uncharacterised 5xTM membrane BCR, YitT family COG1284;Uncharacterized protein conserved in bacteria (DUF2179)	COG1284	Uncharacterized membrane-anchored protein YitT, contains DUF161 and DUF2179 domains	GO:0016021;GO:0005886	integral component of membrane;;plasma membrane	-	-	-	-
gene0622	-	MULTISPECIES: hypothetical protein	RP01	Chromosome	Chromosome	-	615375	614830	546	MULTISPECIES: hypothetical protein	-	-	-	-	-	-	-	-	-	-	-	-
gene0623	-	MULTISPECIES: Gfo/Idh/MocA family oxidoreductase	RP01	Chromosome	Chromosome	-	617328	616216	1113	MULTISPECIES: Gfo/Idh/MocA family oxidoreductase	RecName: Full=Galactose/lactose metabolism regulatory protein GAL80 [Kluyveromyces lactis NRRL Y-1140]	PF01408;PF02894	GFO_IDH_MocA;GFO_IDH_MocA_C	Oxidoreductase family, NAD-binding Rossmann fold;Oxidoreductase family, C-terminal alpha/beta domain	COG0673	Predicted dehydrogenase	-	-	-	-	-	-
gene0624	-	transcriptional regulator family protein	RP01	Chromosome	Chromosome	+	617454	618035	582	transcriptional regulator family protein	RecName: Full=Uncharacterized HTH-type transcriptional regulator YneJ [Escherichia coli K-12]	PF00126;PF03466	HTH_1;LysR_substrate	Bacterial regulatory helix-turn-helix protein, lysR family;LysR substrate binding domain	COG0583	DNA-binding transcriptional regulator, LysR family	GO:0003700	DNA-binding transcription factor activity	-	-	-	-
gene0625	-	hypothetical protein	RP01	Chromosome	Chromosome	+	618070	618300	231	hypothetical protein	-	-	-	-	COG0583	DNA-binding transcriptional regulator, LysR family	-	-	-	-	-	-
gene0626	-	MULTISPECIES: alpha/beta hydrolase	RP01	Chromosome	Chromosome	-	619237	618665	573	MULTISPECIES: alpha/beta hydrolase	RecName: Full=Putative hydrolase YdeN [Bacillus subtilis subsp. subtilis str. 168]	PF06821	Ser_hydrolase	Serine hydrolase	COG3545	Predicted esterase of the alpha/beta hydrolase fold	GO:0016787	hydrolase activity	K07002	uncharacterized protein	-	-
gene0627	-	MULTISPECIES: winged helix-turn-helix transcriptional regulator	RP01	Chromosome	Chromosome	-	619650	619321	330	MULTISPECIES: winged helix-turn-helix transcriptional regulator	RecName: Full=Uncharacterized HTH-type transcriptional regulator YdzF [Bacillus subtilis subsp. subtilis str. 168]	PF01638	HxlR	HxlR-like helix-turn-helix	COG1733	DNA-binding transcriptional regulator, HxlR family	-	-	-	-	-	-
gene0628	-	hypothetical protein	RP01	Chromosome	Chromosome	+	619814	620035	222	hypothetical protein	-	-	-	-	-	-	GO:0016021	integral component of membrane	-	-	-	-
gene0629	-	MULTISPECIES: cyclase family protein	RP01	Chromosome	Chromosome	-	620921	620133	789	MULTISPECIES: cyclase family protein	RecName: Full=Kynurenine formamidase; Short=KFA; Short=KFase; AltName: Full=Arylformamidase; AltName: Full=N-formylkynurenine formamidase; Short=FKF [Pseudomonas aeruginosa PA7]	PF04199	Cyclase	Putative cyclase	COG1878	Kynurenine formamidase	-	-	-	-	-	-
gene0630	cycA	MULTISPECIES: amino acid permease	RP01	Chromosome	Chromosome	-	622433	621051	1383	MULTISPECIES: amino acid permease	RecName: Full=Uncharacterized transporter YdgF [Bacillus subtilis subsp. subtilis str. 168]	PF00324;PF13520	AA_permease;AA_permease_2	Amino acid permease;Amino acid permease	COG1113	L-asparagine transporter or related permease	-	-	K11737	D-serine/D-alanine/glycine transporter	-	-
gene0631	-	MULTISPECIES: DUF2306 domain-containing protein	RP01	Chromosome	Chromosome	+	623035	623667	633	MULTISPECIES: DUF2306 domain-containing protein	-	PF10067	DUF2306	Predicted membrane protein (DUF2306)	-	-	-	-	-	-	-	-
gene0632	-	MULTISPECIES: putative zinc-binding protein	RP01	Chromosome	Chromosome	+	623885	624244	360	MULTISPECIES: putative zinc-binding protein	RecName: Full=Anaerobic and virulence modulator AnvM [Pseudomonas aeruginosa PAO1]	PF08859	DGC	DGC domain	COG4273	Uncharacterized conserved protein, contains metal-binding DGC domain	-	-	-	-	-	-
gene0633	-	alpha/beta hydrolase fold family protein	RP01	Chromosome	Chromosome	-	625203	624379	825	alpha/beta hydrolase fold family protein	RecName: Full=Uncharacterized hydrolase YraK [Bacillus subtilis subsp. subtilis str. 168]	PF00561;PF12697;PF12146	Abhydrolase_1;Abhydrolase_6;Hydrolase_4	alpha/beta hydrolase fold;Alpha/beta hydrolase family;Serine aminopeptidase, S33	COG0596	2-succinyl-6-hydroxy-2,4-cyclohexadiene-1-carboxylate synthase MenH and related esterases, alpha/beta hydrolase fold	-	-	-	-	-	-
gene0634	-	MULTISPECIES: hypothetical protein	RP01	Chromosome	Chromosome	-	625599	625336	264	MULTISPECIES: hypothetical protein	RecName: Full=Uncharacterized protein YraL [Bacillus subtilis subsp. subtilis str. 168]	-	-	-	COG5566	Transcriptional regulator, middle operon regulator (Mor) family	-	-	-	-	-	-
gene0635	-	hypothetical protein	RP01	Chromosome	Chromosome	-	625766	625677	90	hypothetical protein	-	-	-	-	-	-	-	-	-	-	-	-
gene0636	rpoE	MULTISPECIES: RNA polymerase sigma factor	RP01	Chromosome	Chromosome	+	625944	626441	498	MULTISPECIES: RNA polymerase sigma factor	RecName: Full=RNA polymerase sigma factor SigV [Bacillus subtilis subsp. subtilis str. 168]	PF08281;PF04542;PF04545	Sigma70_r4_2;Sigma70_r2;Sigma70_r4	Sigma-70, region 4;Sigma-70 region 2;Sigma-70, region 4	COG1595	DNA-directed RNA polymerase specialized sigma subunit, sigma24 family	GO:0006352;GO:0003677;GO:0016987	DNA-templated transcription, initiation;;DNA binding;;sigma factor activity	K03088	RNA polymerase sigma-70 factor, ECF subfamily	-	-
gene0637	-	MULTISPECIES: DUF3298 and DUF4163 domain-containing protein	RP01	Chromosome	Chromosome	+	626441	627301	861	MULTISPECIES: DUF3298 and DUF4163 domain-containing protein	RecName: Full=Anti-sigma-V factor RsiV [Bacillus subtilis subsp. subtilis str. 168]	PF11738;PF13739	DUF3298;PdaC	Protein of unknown function (DUF3298);Deacetylase PdaC	-	-	GO:0016021	integral component of membrane	-	-	-	-
gene0638	-	MULTISPECIES: acetyltransferase	RP01	Chromosome	Chromosome	+	627530	629425	1896	MULTISPECIES: acetyltransferase	RecName: Full=Putative peptidoglycan O-acetyltransferase YrhL [Bacillus subtilis subsp. subtilis str. 168]	PF01757	Acyl_transf_3	Acyltransferase family	COG1835	Peptidoglycan/LPS O-acetylase OafA/YrhL, contains acyltransferase and SGNH-hydrolase domains	-	-	-	-	-	-
gene0639	mutT	MULTISPECIES: NUDIX hydrolase	RP01	Chromosome	Chromosome	-	629898	629449	450	MULTISPECIES: NUDIX hydrolase	RecName: Full=Putative 8-oxo-dGTP diphosphatase; Short=8-oxo-dGTPase; AltName: Full=7,8-dihydro-8-oxoguanine-triphosphatase; AltName: Full=Mutator protein MutT; AltName: Full=dGTP pyrophosphohydrolase [Bacillus subtilis subsp. subtilis str. 168]	PF00293	NUDIX	NUDIX domain	COG1051	ADP-ribose pyrophosphatase YjhB, NUDIX family	GO:0016787	hydrolase activity	K03574	8-oxo-dGTP diphosphatase [EC:3.6.1.55]	3.6.1.55	Hydrolases; Acting on acid anhydrides; In phosphorus-containing anhydrides; 8-oxo-dGTP diphosphohydrolase
gene0640	tcaB	MULTISPECIES: Bcr/CflA family efflux MFS transporter	RP01	Chromosome	Chromosome	+	630096	631301	1206	MULTISPECIES: Bcr/CflA family efflux MFS transporter	RecName: Full=Uncharacterized MFS-type transporter YdgK [Bacillus subtilis subsp. subtilis str. 168]	PF07690;PF00083;PF05977	MFS_1;Sugar_tr;MFS_3	Major Facilitator Superfamily;Sugar (and other) transporter;Transmembrane secretion effector	COG2814	Predicted arabinose efflux permease AraJ, MFS family	GO:1990961;GO:0016021;GO:0005886;GO:0042910	xenobiotic detoxification by transmembrane export across the plasma membrane;;integral component of membrane;;plasma membrane;;xenobiotic transmembrane transporter activity	K07552	MFS transporter, DHA1 family, multidrug resistance protein	-	-
gene0641	-	MULTISPECIES: iron-containing alcohol dehydrogenase	RP01	Chromosome	Chromosome	-	632512	631340	1173	MULTISPECIES: iron-containing alcohol dehydrogenase	RecName: Full=Probable NADH-dependent butanol dehydrogenase 2 [Bacillus subtilis subsp. subtilis str. 168]	PF00465;PF13685	Fe-ADH;Fe-ADH_2	Iron-containing alcohol dehydrogenase;Iron-containing alcohol dehydrogenase	COG1979	Alcohol dehydrogenase YqhD, Fe-dependent ADH family	GO:0046872;GO:0016491	metal ion binding;;oxidoreductase activity	K19955	alcohol dehydrogenase [EC:1.1.1.-]	-	-
gene0642	chiS	histidine kinase	RP01	Chromosome	Chromosome	-	635781	632716	3066	histidine kinase	PUTATIVE PSEUDOGENE: RecName: Full=Putative uncharacterized protein YwpD [Bacillus subtilis subsp. subtilis str. 168]	PF02518;PF02518;PF00072;PF06580;PF00512;PF07695	HATPase_c;HATPase_c;Response_reg;His_kinase;HisKA;7TMR-DISM_7TM	Histidine kinase-, DNA gyrase B-, and HSP90-like ATPase;Histidine kinase-, DNA gyrase B-, and HSP90-like ATPase;Response regulator receiver domain;Histidine kinase;His Kinase A (phospho-acceptor) domain;7TM diverse intracellular signalling	COG0642	Signal transduction histidine kinase	GO:0016021;GO:0005524;GO:0000155	integral component of membrane;;ATP binding;;phosphorelay sensor kinase activity	K19694	two-component system, sensor histidine kinase ChiS	-	-
gene0643	-	response regulator	RP01	Chromosome	Chromosome	+	635957	637039	1083	response regulator	RecName: Full=Uncharacterized response regulatory protein YPO3287/y0902/YP_0397 [Yersinia pestis]	PF00072;PF00486	Response_reg;Trans_reg_C	Response regulator receiver domain;Transcriptional regulatory protein, C terminal	COG3947	Two-component response regulator, SAPR family, consists of REC, wHTH and BTAD domains	GO:0006355;GO:0000160;GO:0005737;GO:0003677	regulation of transcription, DNA-templated;;phosphorelay signal transduction system;;cytoplasm;;DNA binding	-	-	-	-
gene0644	-	LPXTG cell wall anchor domain-containing protein	RP01	Chromosome	Chromosome	+	637326	643238	5913	LPXTG cell wall anchor domain-containing protein	RecName: Full=Colossin-A; Flags: Precursor [Dictyostelium discoideum]	PF17802;PF17802;PF17802;PF17802;PF17802;PF17802;PF17802;PF17802;PF05737;PF05737;PF05737;PF05737;PF17961;PF17961	SpaA;SpaA;SpaA;SpaA;SpaA;SpaA;SpaA;SpaA;Collagen_bind;Collagen_bind;Collagen_bind;Collagen_bind;Big_8;Big_8	Prealbumin-like fold domain;Prealbumin-like fold domain;Prealbumin-like fold domain;Prealbumin-like fold domain;Prealbumin-like fold domain;Prealbumin-like fold domain;Prealbumin-like fold domain;Prealbumin-like fold domain;Collagen binding domain;Collagen binding domain;Collagen binding domain;Collagen binding domain;Bacterial Ig domain;Bacterial Ig domain	COG4932	Clumping factor A-related surface protein, MSCRAMM (microbial surface components recognizing adhesive matrix molecules) family, DEv-IgG fold	GO:0007155;GO:0016021;GO:0005576;GO:0005618;GO:0005518	cell adhesion;;integral component of membrane;;extracellular region;;cell wall;;collagen binding	-	-	-	-
gene0645	srtA	MULTISPECIES: class A sortase	RP01	Chromosome	Chromosome	+	643337	643969	633	MULTISPECIES: class A sortase	RecName: Full=Sortase A [Listeria monocytogenes EGD-e]	PF04203	Sortase	Sortase domain	COG3764	Sortase (surface protein transpeptidase)	GO:0008234	cysteine-type peptidase activity	K07284	sortase A [EC:3.4.22.70]	3.4.22.70	Hydrolases; Acting on peptide bonds (peptidases); Cysteine endopeptidases; sortase A
gene0646	iolT	MULTISPECIES: sugar porter family MFS transporter	RP01	Chromosome	Chromosome	+	644539	645960	1422	MULTISPECIES: sugar porter family MFS transporter	RecName: Full=Major myo-inositol transporter IolT [Bacillus subtilis subsp. subtilis str. 168]	PF00083;PF07690	Sugar_tr;MFS_1	Sugar (and other) transporter;Major Facilitator Superfamily	COG2814	Predicted arabinose efflux permease AraJ, MFS family	GO:0016021;GO:0005886;GO:0022857	integral component of membrane;;plasma membrane;;transmembrane transporter activity	K06609	MFS transporter, SP family, major inositol transporter	-	-
gene0654	thiL	MULTISPECIES: thiamine-phosphate kinase	RP01	Chromosome	Chromosome	+	652133	653107	975	MULTISPECIES: thiamine-phosphate kinase	RecName: Full=Thiamine-monophosphate kinase; Short=TMP kinase; Short=Thiamine-phosphate kinase [Bacillus subtilis subsp. subtilis str. 168]	PF00586;PF02769	AIRS;AIRS_C	AIR synthase related protein, N-terminal domain;AIR synthase related protein, C-terminal domain	COG0611	Thiamine monophosphate kinase	GO:0009228;GO:0009229;GO:0005524;GO:0000287;GO:0009030	thiamine biosynthetic process;;thiamine diphosphate biosynthetic process;;ATP binding;;magnesium ion binding;;thiamine-phosphate kinase activity	K00946	thiamine-monophosphate kinase [EC:2.7.4.16]	2.7.4.16	Transferases; Transferring phosphorus-containing groups; Phosphotransferases with a phosphate group as acceptor; ATP:thiamine-phosphate phosphotransferase
gene0655	tsaE	tRNA (adenosine(37)-N6)-threonylcarbamoyltransferase complex ATPase subunit type 1 TsaE	RP01	Chromosome	Chromosome	+	653125	653601	477	tRNA (adenosine(37)-N6)-threonylcarbamoyltransferase complex ATPase subunit type 1 TsaE	RecName: Full=tRNA threonylcarbamoyladenosine biosynthesis protein TsaE; AltName: Full=t(6)A37 threonylcarbamoyladenosine biosynthesis protein TsaE [Bacillus subtilis subsp. subtilis str. 168]	PF02367	TsaE	Threonylcarbamoyl adenosine biosynthesis protein TsaE	COG0802	tRNA A37 threonylcarbamoyladenosine biosynthesis protein TsaE	GO:0002949;GO:0005737;GO:0016740	tRNA threonylcarbamoyladenosine modification;;cytoplasm;;transferase activity	K06925	tRNA threonylcarbamoyladenosine biosynthesis protein TsaE	-	-
gene0656	tsaB	MULTISPECIES: tRNA (adenosine(37)-N6)-threonylcarbamoyltransferase complex dimerization subunit type 1 TsaB	RP01	Chromosome	Chromosome	+	653582	654271	690	MULTISPECIES: tRNA (adenosine(37)-N6)-threonylcarbamoyltransferase complex dimerization subunit type 1 TsaB	RecName: Full=tRNA threonylcarbamoyladenosine biosynthesis protein TsaB; AltName: Full=t(6)A37 threonylcarbamoyladenosine biosynthesis protein TsaB [Bacillus subtilis subsp. subtilis str. 168]	PF00814	TsaD	tRNA N6-adenosine threonylcarbamoyltransferase	COG1214	tRNA A37 threonylcarbamoyladenosine modification protein TsaB	GO:0002949;GO:0016740	tRNA threonylcarbamoyladenosine modification;;transferase activity	K14742	tRNA threonylcarbamoyladenosine biosynthesis protein TsaB	-	-
gene0657	rimI	ribosomal protein S18-alanine N-acetyltransferase	RP01	Chromosome	Chromosome	+	654296	654742	447	ribosomal protein S18-alanine N-acetyltransferase	RecName: Full=Putative [ribosomal protein S18]-alanine N-acetyltransferase; AltName: Full=Acetylating enzyme for N-terminal of ribosomal protein S18 [Bacillus subtilis subsp. subtilis str. 168]	PF00583;PF13508;PF13673;PF13527;PF08445;PF13302;PF13420	Acetyltransf_1;Acetyltransf_7;Acetyltransf_10;Acetyltransf_9;FR47;Acetyltransf_3;Acetyltransf_4	Acetyltransferase (GNAT) family;Acetyltransferase (GNAT) domain;Acetyltransferase (GNAT) domain;Acetyltransferase (GNAT) domain;FR47-like protein;Acetyltransferase (GNAT) domain;Acetyltransferase (GNAT) domain	COG0456	Ribosomal protein S18 acetylase RimI and related acetyltransferases	GO:0006474;GO:0005737;GO:0008999	N-terminal protein amino acid acetylation;;cytoplasm;;ribosomal-protein-alanine N-acetyltransferase activity	K03789	[ribosomal protein S18]-alanine N-acetyltransferase [EC:2.3.1.266]	2.3.1.266	Transferases; Acyltransferases; Transferring groups other than aminoacyl groups; acetyl-CoA:N-terminal L-alanyl-[S18 protein of 30S ribosome] N-acetyltransferase
gene0658	tsaD	MULTISPECIES: tRNA (adenosine(37)-N6)-threonylcarbamoyltransferase complex transferase subunit TsaD	RP01	Chromosome	Chromosome	+	654732	655757	1026	MULTISPECIES: tRNA (adenosine(37)-N6)-threonylcarbamoyltransferase complex transferase subunit TsaD	RecName: Full=tRNA N6-adenosine threonylcarbamoyltransferase; AltName: Full=N6-L-threonylcarbamoyladenine synthase; Short=t(6)A synthase; AltName: Full=t(6)A37 threonylcarbamoyladenosine biosynthesis protein TsaD; AltName: Full=tRNA threonylcarbamoyladenosine biosynthesis protein TsaD [Bacillus licheniformis DSM 13 = ATCC 14580]	PF00814	TsaD	tRNA N6-adenosine threonylcarbamoyltransferase	COG0533	tRNA A37 threonylcarbamoyltransferase TsaD	-	-	K01409	N6-L-threonylcarbamoyladenine synthase [EC:2.3.1.234]	2.3.1.234	Transferases; Acyltransferases; Transferring groups other than aminoacyl groups; L-threonylcarbamoyladenylate:adenine37 in tRNA N6-L-threonylcarbamoyltransferase
gene0659	-	ABC-F family ATP-binding cassette domain-containing protein	RP01	Chromosome	Chromosome	-	657922	655997	1926	ABC-F family ATP-binding cassette domain-containing protein	RecName: Full=Putative ATP-binding protein YdiF [Bacillus subtilis subsp. subtilis str. 168]	PF00005;PF00005;PF12848;PF16326	ABC_tran;ABC_tran;ABC_tran_Xtn;ABC_tran_CTD	ABC transporter;ABC transporter;ABC transporter;ABC transporter C-terminal domain	COG0488	ATPase components of ABC transporters with duplicated ATPase domains	-	-	K06158	ATP-binding cassette, subfamily F, member 3	-	-
gene0660	moaC	MULTISPECIES: cyclic pyranopterin monophosphate synthase MoaC	RP01	Chromosome	Chromosome	+	658069	658575	507	MULTISPECIES: cyclic pyranopterin monophosphate synthase MoaC	RecName: Full=Cyclic pyranopterin monophosphate synthase; AltName: Full=Molybdenum cofactor biosynthesis protein C [Bacillus licheniformis DSM 13 = ATCC 14580]	PF01967	MoaC	MoaC family	COG0315	Molybdenum cofactor biosynthesis enzyme MoaC	GO:0006777;GO:0061799	Mo-molybdopterin cofactor biosynthetic process;;cyclic pyranopterin monophosphate synthase activity	K03637	cyclic pyranopterin monophosphate synthase [EC:4.6.1.17]	4.6.1.17	Lyases; Phosphorus-oxygen lyases; Phosphorus-oxygen lyases (only sub-subclass identified to date); (8S)-3',8-cyclo-7,8-dihydroguanosine 5'-triphosphate lyase (cyclic pyranopterin phosphate-forming)
gene0661	rex	MULTISPECIES: redox-sensing transcriptional repressor Rex	RP01	Chromosome	Chromosome	+	658579	659223	645	MULTISPECIES: redox-sensing transcriptional repressor Rex	RecName: Full=Redox-sensing transcriptional repressor Rex [Bacillus licheniformis DSM 13 = ATCC 14580]	PF02629;PF06971	CoA_binding;Put_DNA-bind_N	CoA binding domain;Putative DNA-binding protein N-terminus	COG2344	NADH/NAD ratio-sensing transcriptional regulator Rex	GO:0045892;GO:0051775;GO:0005737;GO:0003677;GO:0003700	negative regulation of transcription, DNA-templated;;response to redox state;;cytoplasm;;DNA binding;;DNA-binding transcription factor activity	K01926	redox-sensing transcriptional repressor	-	-
gene0662	tatA	MULTISPECIES: twin-arginine translocase TatA/TatE family subunit	RP01	Chromosome	Chromosome	+	659262	659435	174	MULTISPECIES: twin-arginine translocase TatA/TatE family subunit	RecName: Full=Sec-independent protein translocase protein TatAy [Bacillus subtilis subsp. subtilis str. 168]	PF02416	TatA_B_E	mttA/Hcf106 family	COG1826	Twin-arginine protein secretion pathway components TatA and TatB	GO:0043953;GO:0005887;GO:0033281;GO:0008320	protein transport by the Tat complex;;integral component of plasma membrane;;TAT protein transport complex;;protein transmembrane transporter activity	K03116	sec-independent protein translocase protein TatA	-	-
gene0663	tatC	MULTISPECIES: twin-arginine translocase subunit TatC	RP01	Chromosome	Chromosome	+	659442	660218	777	MULTISPECIES: twin-arginine translocase subunit TatC	RecName: Full=Sec-independent protein translocase protein TatCy [Bacillus subtilis subsp. subtilis str. 168]	PF00902	TatC	Sec-independent protein translocase protein (TatC)	COG0805	Twin-arginine protein secretion pathway component TatC	-	-	K03118	sec-independent protein translocase protein TatC	-	-
gene0664	-	MULTISPECIES: YdiK family protein	RP01	Chromosome	Chromosome	-	660457	660263	195	MULTISPECIES: YdiK family protein	RecName: Full=Uncharacterized lipoprotein YdiK; Flags: Precursor [Bacillus subtilis subsp. subtilis str. 168]	PF14146	DUF4305	Domain of unknown function (DUF4305)	-	-	-	-	-	-	-	-
gene0665	-	MULTISPECIES: CPBP family intramembrane metalloprotease	RP01	Chromosome	Chromosome	-	661188	660454	735	MULTISPECIES: CPBP family intramembrane metalloprotease	RecName: Full=Putative membrane peptidase YdiL; AltName: Full=Putative CAAX prenyl protease [Bacillus subtilis subsp. subtilis str. 168]	PF02517	Rce1-like	Type II CAAX prenyl endopeptidase Rce1-like	COG1266	Membrane protease YdiL, CAAX protease family	-	-	K07052	CAAX protease family protein	-	-
gene0666	groES	MULTISPECIES: co-chaperone GroES	RP01	Chromosome	Chromosome	+	661414	661698	285	MULTISPECIES: co-chaperone GroES	RecName: Full=Co-chaperonin GroES; AltName: Full=10 kDa chaperonin; AltName: Full=Chaperonin-10; Short=Cpn10 [Bacillus licheniformis DSM 13 = ATCC 14580]	PF00166	Cpn10	Chaperonin 10 Kd subunit	COG0234	Co-chaperonin GroES (HSP10)	GO:0006457;GO:0051085;GO:0005737;GO:0005524;GO:0046872;GO:0016887;GO:0051082;GO:0051087	protein folding;;chaperone cofactor-dependent protein refolding;;cytoplasm;;ATP binding;;metal ion binding;;ATP hydrolysis activity;;unfolded protein binding;;chaperone binding	K04078	chaperonin GroES	-	-
gene0667	groEL	MULTISPECIES: chaperonin GroEL	RP01	Chromosome	Chromosome	+	661743	663377	1635	MULTISPECIES: chaperonin GroEL	RecName: Full=Chaperonin GroEL; AltName: Full=60 kDa chaperonin; AltName: Full=Chaperonin-60; Short=Cpn60 [Bacillus licheniformis DSM 13 = ATCC 14580]	PF00118	Cpn60_TCP1	TCP-1/cpn60 chaperonin family	COG0459	Chaperonin GroEL (HSP60 family)	GO:0042026;GO:0005737;GO:0005524;GO:0016887;GO:0051082	protein refolding;;cytoplasm;;ATP binding;;ATP hydrolysis activity;;unfolded protein binding	K04077	chaperonin GroEL	-	-
gene0668	-	MULTISPECIES: IS1182 family transposase	RP01	Chromosome	Chromosome	+	663524	664954	1431	MULTISPECIES: IS1182 family transposase	-	PF13751;PF05598;PF01609	DDE_Tnp_1_6;DUF772;DDE_Tnp_1	Transposase DDE domain;Transposase domain (DUF772);Transposase DDE domain	COG3666	Transposase, IS1182 family	-	-	-	-	-	-
gene0669	-	hypothetical protein	RP01	Chromosome	Chromosome	-	665187	664978	210	hypothetical protein	-	-	-	-	-	-	-	-	-	-	-	-
gene0670	-	hypothetical protein	RP01	Chromosome	Chromosome	+	665355	665564	210	hypothetical protein	-	-	-	-	-	-	-	-	-	-	-	-
gene0671	-	MULTISPECIES: VanW family protein	RP01	Chromosome	Chromosome	+	665707	666624	918	MULTISPECIES: VanW family protein	RecName: Full=Uncharacterized protein YoaR [Bacillus subtilis subsp. subtilis str. 168]	PF04294	VanW	VanW like protein	COG2720	Vancomycin resistance protein YoaR (function unknown), contains peptidoglycan-binding and VanW domains	-	-	-	-	-	-
gene0672	-	MULTISPECIES: YfmQ family protein	RP01	Chromosome	Chromosome	+	666741	667190	450	MULTISPECIES: YfmQ family protein	RecName: Full=Uncharacterized protein YfmQ [Bacillus subtilis subsp. subtilis str. 168]	PF10787	YfmQ	Uncharacterised protein from bacillus cereus group	-	-	-	-	-	-	-	-
gene0673	-	MULTISPECIES: hypothetical protein	RP01	Chromosome	Chromosome	-	667482	667216	267	MULTISPECIES: hypothetical protein	-	-	-	-	-	-	-	-	-	-	-	-
gene0674	-	MULTISPECIES: GNAT family N-acetyltransferase	RP01	Chromosome	Chromosome	+	667579	668040	462	MULTISPECIES: GNAT family N-acetyltransferase	-	PF00583;PF13673;PF13302	Acetyltransf_1;Acetyltransf_10;Acetyltransf_3	Acetyltransferase (GNAT) family;Acetyltransferase (GNAT) domain;Acetyltransferase (GNAT) domain	COG0456	Ribosomal protein S18 acetylase RimI and related acetyltransferases	-	-	-	-	-	-
gene0675	-	MULTISPECIES: SOS response-associated peptidase	RP01	Chromosome	Chromosome	-	668786	668106	681	MULTISPECIES: SOS response-associated peptidase	RecName: Full=Abasic site processing protein YoqW [Bacillus subtilis subsp. subtilis str. 168] >lcl|O64131.1 RecName: Full=SOS response-associated protein yoqW [Bacillus virus SPbeta]	PF02586	SRAP	SOS response associated peptidase (SRAP)	COG2135	ssDNA abasic site-binding protein YedK/HMCES, SRAP family	-	-	-	-	-	-
gene0676	rutR	MULTISPECIES: TetR/AcrR family transcriptional regulator	RP01	Chromosome	Chromosome	+	669217	669831	615	MULTISPECIES: TetR/AcrR family transcriptional regulator	RecName: Full=HTH-type transcriptional regulator RutR; AltName: Full=Rut operon repressor [Escherichia coli O157:H7]	PF00440	TetR_N	Bacterial regulatory proteins, tetR family	COG1309	DNA-binding protein, AcrR family, includes nucleoid occlusion protein SlmA	GO:0003677	DNA binding	K09017	TetR/AcrR family transcriptional regulator	-	-
gene0677	rph	MULTISPECIES: phosphoenolpyruvate synthase	RP01	Chromosome	Chromosome	+	669847	672471	2625	MULTISPECIES: phosphoenolpyruvate synthase	RecName: Full=Putative phosphoenolpyruvate synthase; Short=Putative PEP synthase; AltName: Full=Pyruvate, water dikinase [Bacillus subtilis subsp. subtilis str. 168]	PF01326;PF00391	PPDK_N;PEP-utilizers	Pyruvate phosphate dikinase, AMP/ATP-binding domain;PEP-utilising enzyme, mobile domain	COG0574	Phosphoenolpyruvate synthase/pyruvate phosphate dikinase	-	-	K22579	rifampicin phosphotransferase [EC:2.7.9.6]	2.7.9.6	Transferases; Transferring phosphorus-containing groups; Phosphotransferases with paired acceptors; ATP:rifampicin, water 21-O-phosphotransferase
gene0678	-	MULTISPECIES: hypothetical protein	RP01	Chromosome	Chromosome	-	672782	672498	285	MULTISPECIES: hypothetical protein	RecName: Full=Uncharacterized protein YoaF [Bacillus subtilis subsp. subtilis str. 168]	-	-	-	-	-	GO:0003677	DNA binding	-	-	-	-
gene0679	-	MULTISPECIES: DUF488 family protein	RP01	Chromosome	Chromosome	-	673210	672848	363	MULTISPECIES: DUF488 family protein	RecName: Full=Uncharacterized protein YeaO [Escherichia coli K-12]	PF04343	DUF488	Protein of unknown function, DUF488	COG3189	Uncharacterized conserved protein YeaO, DUF488 family	-	-	-	-	-	-
gene0680	dltE	MULTISPECIES: SDR family NAD(P)-dependent oxidoreductase	RP01	Chromosome	Chromosome	-	674058	673294	765	MULTISPECIES: SDR family NAD(P)-dependent oxidoreductase	RecName: Full=Uncharacterized oxidoreductase DltE [Bacillus subtilis subsp. subtilis str. 168]	PF00106;PF13561;PF08659;PF01370	adh_short;adh_short_C2;KR;Epimerase	short chain dehydrogenase;Enoyl-(Acyl carrier protein) reductase;KR domain;NAD dependent epimerase/dehydratase family	COG3967	Short-chain dehydrogenase involved in D-alanine esterification of teichoic acids	GO:0016491	oxidoreductase activity	K14189	uncharacterized oxidoreductase [EC:1.-.-.-]	-	-
gene0681	pnbA	MULTISPECIES: carboxylesterase/lipase family protein	RP01	Chromosome	Chromosome	+	674212	675687	1476	MULTISPECIES: carboxylesterase/lipase family protein	RecName: Full=Para-nitrobenzyl esterase; AltName: Full=Intracellular esterase B; AltName: Full=PNB carboxy-esterase; Short=PNBCE [Bacillus subtilis subsp. subtilis str. 168]	PF00135;PF07859	COesterase;Abhydrolase_3	Carboxylesterase family;alpha/beta hydrolase fold	COG2272	Carboxylesterase type B	-	-	K03929	para-nitrobenzyl esterase [EC:3.1.1.-]	-	-
gene0682	iolF	MULTISPECIES: MFS transporter	RP01	Chromosome	Chromosome	-	676985	675708	1278	MULTISPECIES: MFS transporter	RecName: Full=Minor myo-inositol transporter IolF [Bacillus subtilis subsp. subtilis str. 168]	PF00083;PF07690	Sugar_tr;MFS_1	Sugar (and other) transporter;Major Facilitator Superfamily	COG2271	Sugar phosphate permease	GO:0016021;GO:0005886;GO:0022857	integral component of membrane;;plasma membrane;;transmembrane transporter activity	K06610	MFS transporter, SP family, inositol transporter	-	-
gene0683	pspA	MULTISPECIES: PspA/IM30 family protein	RP01	Chromosome	Chromosome	+	677355	678035	681	MULTISPECIES: PspA/IM30 family protein	RecName: Full=Phage shock protein A homolog [Bacillus subtilis subsp. subtilis str. 168]	PF04012	PspA_IM30	PspA/IM30 family	COG1842	Phage shock protein A	-	-	K03969	phage shock protein A	-	-
gene0684	-	MULTISPECIES: TFIIB-type zinc ribbon-containing protein	RP01	Chromosome	Chromosome	+	678071	679096	1026	MULTISPECIES: TFIIB-type zinc ribbon-containing protein	RecName: Full=Uncharacterized protein YdjG [Bacillus subtilis subsp. subtilis str. 168]	-	-	-	COG1996	DNA-directed RNA polymerase, subunit RPC12/RpoP, contains C4-type Zn-finger	GO:0016021	integral component of membrane	-	-	-	-
gene0685	-	YdjH	RP01	Chromosome	Chromosome	+	679093	679863	771	YdjH	RecName: Full=UPF0603 protein YdjH; Flags: Precursor [Bacillus subtilis subsp. subtilis str. 168]	PF04536	TPM_phosphatase	TPM domain	COG1512	Uncharacterized membrane protein YgcG, contains a TPM-fold domain	-	-	K06872	uncharacterized protein	-	-
gene0686	-	MULTISPECIES: SPFH domain-containing protein	RP01	Chromosome	Chromosome	+	679884	680858	975	MULTISPECIES: SPFH domain-containing protein	RecName: Full=Uncharacterized protein YdjI [Bacillus subtilis subsp. subtilis str. 168]	PF13421;PF13248;PF01145	Band_7_1;zf-ribbon_3;Band_7	SPFH domain-Band 7 family;zinc-ribbon domain;SPFH domain / Band 7 family	COG4260	Membrane protease subunit, stomatin/prohibitin family, contains C-terminal Zn-ribbon domain	-	-	-	-	-	-
gene0687	-	MULTISPECIES: LLM class flavin-dependent oxidoreductase	RP01	Chromosome	Chromosome	+	681095	682150	1056	MULTISPECIES: LLM class flavin-dependent oxidoreductase	RecName: Full=Uncharacterized protein y4vJ [Sinorhizobium fredii NGR234]	PF00296	Bac_luciferase	Luciferase-like monooxygenase	COG2141	Flavin-dependent oxidoreductase, luciferase family (includes alkanesulfonate monooxygenase SsuD and methylene tetrahydromethanopterin reductase)	GO:0016705	oxidoreductase activity, acting on paired donors, with incorporation or reduction of molecular oxygen	-	-	-	-
gene0688	trmB	MULTISPECIES: TrmB family transcriptional regulator	RP01	Chromosome	Chromosome	-	683013	682186	828	MULTISPECIES: TrmB family transcriptional regulator	RecName: Full=Uncharacterized protein YrhO [Bacillus subtilis subsp. subtilis str. 168]	PF01978;PF11495	TrmB;Regulator_TrmB	Sugar-specific transcriptional regulator TrmB;Archaeal transcriptional regulator TrmB	COG1378	Sugar-specific transcriptional regulator TrmB	-	-	K23356	HTH-type transcriptional regulator, sugar sensing transcriptional regulator	-	-
gene0689	-	MULTISPECIES: homoserine/threonine efflux transporter	RP01	Chromosome	Chromosome	+	683161	683793	633	MULTISPECIES: homoserine/threonine efflux transporter	RecName: Full=Uncharacterized membrane protein YrhP [Bacillus subtilis subsp. subtilis str. 168]	PF01810	LysE	LysE type translocator	COG1280	Threonine/homoserine/homoserine lactone efflux protein	GO:0006865;GO:0016021;GO:0005886	amino acid transport;;integral component of membrane;;plasma membrane	-	-	-	-
gene0690	-	MULTISPECIES: helix-turn-helix domain-containing protein	RP01	Chromosome	Chromosome	+	683987	684631	645	MULTISPECIES: helix-turn-helix domain-containing protein	-	PF01381;PF06803;PF13443;PF12844;PF13560	HTH_3;DUF1232;HTH_26;HTH_19;HTH_31	Helix-turn-helix;Protein of unknown function (DUF1232);Cro/C1-type HTH DNA-binding domain;Helix-turn-helix domain;Helix-turn-helix domain	COG1396	Transcriptional regulator, contains XRE-family HTH domain	-	-	-	-	-	-
gene0691	rodA	MULTISPECIES: rod shape-determining protein RodA	RP01	Chromosome	Chromosome	+	684647	685804	1158	MULTISPECIES: rod shape-determining protein RodA	RecName: Full=Stage V sporulation protein E [Bacillus subtilis subsp. subtilis str. 168]	PF01098	FTSW_RODA_SPOVE	Cell cycle protein	COG0772	Peptodoglycan polymerase FtsW/RodA/SpoVE	GO:0051301;GO:0008360;GO:0016021	cell division;;regulation of cell shape;;integral component of membrane	K05837	rod shape determining protein RodA	-	-
gene0692	ftsW	MULTISPECIES: putative lipid II flippase FtsW	RP01	Chromosome	Chromosome	+	685801	686943	1143	MULTISPECIES: putative lipid II flippase FtsW	RecName: Full=Probable peptidoglycan glycosyltransferase FtsW; Short=PGT; AltName: Full=Cell division protein FtsW; AltName: Full=Cell wall polymerase; AltName: Full=Peptidoglycan polymerase; Short=PG polymerase [Bacillus subtilis subsp. subtilis str. 168]	PF01098	FTSW_RODA_SPOVE	Cell cycle protein	COG0772	Peptodoglycan polymerase FtsW/RodA/SpoVE	-	-	K03588	cell division protein FtsW	-	-
gene0693	phnB	MULTISPECIES: VOC family protein	RP01	Chromosome	Chromosome	-	688035	687610	426	MULTISPECIES: VOC family protein	RecName: Full=Protein YjdN [Escherichia coli K-12]	PF06983;PF00903	3-dmu-9_3-mt;Glyoxalase	3-demethylubiquinone-9 3-methyltransferase;Glyoxalase/Bleomycin resistance protein/Dioxygenase superfamily	COG2764	Zn-dependent glyoxalase, PhnB family	-	-	K04750	PhnB protein	-	-
gene0694	-	MULTISPECIES: YafY family transcriptional regulator	RP01	Chromosome	Chromosome	+	688130	689077	948	MULTISPECIES: YafY family transcriptional regulator	RecName: Full=Uncharacterized HTH-type transcriptional regulator YobV [Bacillus subtilis subsp. subtilis str. 168]	PF13280;PF08279;PF08220	WYL;HTH_11;HTH_DeoR	WYL domain;HTH domain;DeoR-like helix-turn-helix domain	COG2378	Predicted DNA-binding transcriptional regulator YobV, contains HTH and WYL domains	GO:0003700	DNA-binding transcription factor activity	-	-	-	-
gene0695	-	MULTISPECIES: DUF3298 and DUF4163 domain-containing protein	RP01	Chromosome	Chromosome	+	689369	690046	678	MULTISPECIES: DUF3298 and DUF4163 domain-containing protein	RecName: Full=Peptidoglycan-N-acetylmuramic acid deacetylase PdaC; Short=Peptidoglycan MurNAc deacetylase; AltName: Full=Polysaccharide deacetylase PdaC [Bacillus subtilis subsp. subtilis str. 168]	PF13739;PF11738	PdaC;DUF3298	Deacetylase PdaC;Protein of unknown function (DUF3298)	-	-	-	-	-	-	-	-
gene0696	pgdA	MULTISPECIES: polysaccharide deacetylase family protein	RP01	Chromosome	Chromosome	+	690118	691497	1380	MULTISPECIES: polysaccharide deacetylase family protein	RecName: Full=Peptidoglycan-N-acetylmuramic acid deacetylase PdaC; Short=Peptidoglycan MurNAc deacetylase; AltName: Full=Polysaccharide deacetylase PdaC [Bacillus subtilis subsp. subtilis str. 168]	PF01522;PF13739	Polysacc_deac_1;PdaC	Polysaccharide deacetylase;Deacetylase PdaC	COG0726	Peptidoglycan/xylan/chitin deacetylase, PgdA/NodB/CDA1 family	GO:0005975;GO:0016021;GO:0046872;GO:0016810	carbohydrate metabolic process;;integral component of membrane;;metal ion binding;;hydrolase activity, acting on carbon-nitrogen (but not peptide) bonds	K22278	peptidoglycan-N-acetylglucosamine deacetylase [EC:3.5.1.104]	3.5.1.104	Hydrolases; Acting on carbon-nitrogen bonds, other than peptide bonds; In linear amides; peptidoglycan-N-acetylglucosamine amidohydrolase
gene0697	amyA	cytochrome C oxidase subunit II	RP01	Chromosome	Chromosome	+	691502	693166	1665	cytochrome C oxidase subunit II	RecName: Full=Alpha-amylase; AltName: Full=1,4-alpha-D-glucan glucanohydrolase; AltName: Full=BLA; Flags: Precursor [Bacillus licheniformis]	PF00128;PF02324;PF09154	Alpha-amylase;Glyco_hydro_70;DUF1939	Alpha amylase, catalytic domain;Glycosyl hydrolase family 70;Domain of unknown function (DUF1939)	COG0366	Glycosidase/amylase (phosphorylase)	-	-	K01176	alpha-amylase [EC:3.2.1.1]	3.2.1.1	Hydrolases; Glycosylases; Glycosidases, i.e. enzymes that hydrolyse O- and S-glycosyl compounds; 4-alpha-D-glucan glucanohydrolase
gene0698	-	IS1182 family transposase	RP01	Chromosome	Chromosome	-	694638	693208	1431	IS1182 family transposase	-	PF13751;PF05598;PF01609	DDE_Tnp_1_6;DUF772;DDE_Tnp_1	Transposase DDE domain;Transposase domain (DUF772);Transposase DDE domain	COG3666	Transposase, IS1182 family	-	-	-	-	-	-
gene0699	-	MULTISPECIES: LacI family transcriptional regulator	RP01	Chromosome	Chromosome	+	694904	695854	951	MULTISPECIES: LacI family transcriptional regulator	RecName: Full=Uncharacterized HTH-type transcriptional regulator YvdE [Bacillus subtilis subsp. subtilis str. 168]	PF13377;PF00356;PF00532	Peripla_BP_3;LacI;Peripla_BP_1	Periplasmic binding protein-like domain;Bacterial regulatory proteins, lacI family;Periplasmic binding proteins and sugar binding domain of LacI family	COG1609	DNA-binding transcriptional regulator, LacI/PurR family	GO:0006355;GO:0003677	regulation of transcription, DNA-templated;;DNA binding	-	-	-	-
gene0700	nplT	Neopullulanase	RP01	Chromosome	Chromosome	+	695973	697733	1761	Neopullulanase	RecName: Full=Intracellular maltogenic amylase [Bacillus subtilis subsp. subtilis str. 168]	PF00128;PF02903	Alpha-amylase;Alpha-amylase_N	Alpha amylase, catalytic domain;Alpha amylase, N-terminal ig-like domain	COG0366	Glycosidase/amylase (phosphorylase)	-	-	K01208	cyclomaltodextrinase / maltogenic alpha-amylase / neopullulanase [EC:3.2.1.54 3.2.1.133 3.2.1.135]	3.2.1.54;3.2.1.133;3.2.1.135	Hydrolases; Glycosylases; Glycosidases, i.e. enzymes that hydrolyse O- and S-glycosyl compounds; cyclomaltodextrin dextrin-hydrolase (ring-opening)|Hydrolases; Glycosylases; Glycosidases, i.e. enzymes that hydrolyse O- and S-glycosyl compounds; 4-alpha-D-glucan alpha-maltohydrolase|Hydrolases; Glycosylases; Glycosidases, i.e. enzymes that hydrolyse O- and S-glycosyl compounds; pullulan 4-D-glucan…
gene0701	cycB	MULTISPECIES: extracellular solute-binding protein	RP01	Chromosome	Chromosome	+	697828	699081	1254	MULTISPECIES: extracellular solute-binding protein	RecName: Full=Maltodextrin-binding protein MdxE; Flags: Precursor [Bacillus subtilis subsp. subtilis str. 168]	PF13416;PF01547;PF13531	SBP_bac_8;SBP_bac_1;SBP_bac_11	Bacterial extracellular solute-binding protein;Bacterial extracellular solute-binding protein;Bacterial extracellular solute-binding protein	COG2182	Maltose-binding periplasmic protein MalE	GO:0005886;GO:0015144	plasma membrane;;carbohydrate transmembrane transporter activity	K15770	arabinogalactan oligomer / maltooligosaccharide transport system substrate-binding protein	-	-
gene0702	ganP	MULTISPECIES: sugar ABC transporter permease	RP01	Chromosome	Chromosome	+	699123	700430	1308	MULTISPECIES: sugar ABC transporter permease	RecName: Full=Maltodextrin transport system permease protein MdxF [Bacillus subtilis subsp. subtilis str. 168]	PF00528	BPD_transp_1	Binding-protein-dependent transport system inner membrane component	COG1175	ABC-type sugar transport system, permease component	GO:0055085;GO:0016021;GO:0005886	transmembrane transport;;integral component of membrane;;plasma membrane	K15771	arabinogalactan oligomer / maltooligosaccharide transport system permease protein	-	-
gene0703	ganQ	MULTISPECIES: sugar ABC transporter permease	RP01	Chromosome	Chromosome	+	700431	701282	852	MULTISPECIES: sugar ABC transporter permease	RecName: Full=Maltodextrin transport system permease protein MdxG [Bacillus subtilis subsp. subtilis str. 168]	PF00528	BPD_transp_1	Binding-protein-dependent transport system inner membrane component	COG3833	ABC-type maltose transport system, permease component MalG	GO:0055085;GO:0016021;GO:0005886	transmembrane transport;;integral component of membrane;;plasma membrane	K15772	arabinogalactan oligomer / maltooligosaccharide transport system permease protein	-	-
gene0704	-	MULTISPECIES: DUF1189 family protein	RP01	Chromosome	Chromosome	+	701287	702171	885	MULTISPECIES: DUF1189 family protein	RecName: Full=Putative maltodextrin utilization protein YvdJ [Bacillus subtilis subsp. subtilis str. 168]	PF06691	DUF1189	Protein of unknown function (DUF1189)	COG5521	Maltodextrin utilization protein YvdJ (function unknown)	-	-	-	-	-	-
gene0705	mapA	MULTISPECIES: glycoside hydrolase family 65 protein	RP01	Chromosome	Chromosome	+	702149	704485	2337	MULTISPECIES: glycoside hydrolase family 65 protein	RecName: Full=Maltose phosphorylase [Bacillus subtilis subsp. subtilis str. 168]	PF03632;PF03636;PF03633	Glyco_hydro_65m;Glyco_hydro_65N;Glyco_hydro_65C	Glycosyl hydrolase family 65 central catalytic domain;Glycosyl hydrolase family 65, N-terminal domain;Glycosyl hydrolase family 65, C-terminal domain	COG1554	Kojibiose phosphorylase YcjT	-	-	K00691	maltose phosphorylase [EC:2.4.1.8]	2.4.1.8	Transferases; Glycosyltransferases; Hexosyltransferases; maltose:phosphate 1-beta-D-glucosyltransferase
gene0706	malL	MULTISPECIES: alpha-glucosidase	RP01	Chromosome	Chromosome	+	704427	706133	1707	MULTISPECIES: alpha-glucosidase	RecName: Full=Oligo-1,6-glucosidase 1; AltName: Full=Dextrin 6-alpha-D-glucanohydrolase; AltName: Full=Oligosaccharide alpha-1,6-glucosidase 1; AltName: Full=Sucrase-isomaltase 1; Short=Isomaltase 1 [Bacillus subtilis subsp. subtilis str. 168]	PF00128;PF16657;PF11941	Alpha-amylase;Malt_amylase_C;DUF3459	Alpha amylase, catalytic domain;Maltogenic Amylase, C-terminal domain;Domain of unknown function (DUF3459)	COG0366	Glycosidase/amylase (phosphorylase)	-	-	K01182	oligo-1,6-glucosidase [EC:3.2.1.10]	3.2.1.10	Hydrolases; Glycosylases; Glycosidases, i.e. enzymes that hydrolyse O- and S-glycosyl compounds; oligosaccharide 6-alpha-glucohydrolase
gene0707	pgmB	MULTISPECIES: beta-phosphoglucomutase	RP01	Chromosome	Chromosome	+	706130	706810	681	MULTISPECIES: beta-phosphoglucomutase	RecName: Full=Beta-phosphoglucomutase; Short=Beta-PGM [Bacillus subtilis subsp. subtilis str. 168]	PF13419;PF00702;PF13242	HAD_2;Hydrolase;Hydrolase_like	Haloacid dehalogenase-like hydrolase;haloacid dehalogenase-like hydrolase;HAD-hyrolase-like	COG0637	Beta-phosphoglucomutase, HAD superfamily	-	-	K01838	beta-phosphoglucomutase [EC:5.4.2.6]	5.4.2.6	Isomerases; Intramolecular transferases; Phosphotransferases (phosphomutases); beta-D-glucose 1,6-phosphomutase
gene0708	tyrS	MULTISPECIES: tyrosine--tRNA ligase	RP01	Chromosome	Chromosome	-	708279	707026	1254	MULTISPECIES: tyrosine--tRNA ligase	RecName: Full=Tyrosine--tRNA ligase 2; AltName: Full=Tyrosyl-tRNA synthetase 2; Short=TyrRS 2 [Bacillus licheniformis DSM 13 = ATCC 14580]	PF00579;PF01479	tRNA-synt_1b;S4	tRNA synthetases class I (W and Y);S4 domain	COG0162	Tyrosyl-tRNA synthetase	-	-	K01866	tyrosyl-tRNA synthetase [EC:6.1.1.1]	6.1.1.1	Ligases; Forming carbon-oxygen bonds; Ligases forming aminoacyl-tRNA and related compounds; L-tyrosine:tRNATyr ligase (AMP-forming)
gene0709	mhqR	MULTISPECIES: MarR family transcriptional regulator	RP01	Chromosome	Chromosome	-	709040	708534	507	MULTISPECIES: MarR family transcriptional regulator	RecName: Full=Uncharacterized HTH-type transcriptional regulator YwaE [Bacillus subtilis subsp. subtilis str. 168]	PF01047;PF13463	MarR;HTH_27	MarR family;Winged helix DNA-binding domain	COG1846	DNA-binding transcriptional regulator, MarR family	GO:0003700	DNA-binding transcription factor activity	K15973	MarR family transcriptional regulator, 2-MHQ and catechol-resistance regulon repressor	-	-
gene0710	-	MULTISPECIES: hypothetical protein	RP01	Chromosome	Chromosome	-	709744	709178	567	MULTISPECIES: hypothetical protein	-	-	-	-	-	-	-	-	-	-	-	-
gene0711	-	MULTISPECIES: hypothetical protein	RP01	Chromosome	Chromosome	-	710133	709741	393	MULTISPECIES: hypothetical protein	-	-	-	-	-	-	-	-	-	-	-	-
gene0712	-	MULTISPECIES: hypothetical protein	RP01	Chromosome	Chromosome	+	710335	710715	381	MULTISPECIES: hypothetical protein	RecName: Full=Uncharacterized protein YdjM; AltName: Full=PSPA13 [Bacillus subtilis subsp. subtilis str. 168]	PF03330	DPBB_1	Lytic transglycolase	-	-	-	-	-	-	-	-
gene0713	-	MULTISPECIES: PD40 domain-containing protein	RP01	Chromosome	Chromosome	+	710772	711791	1020	MULTISPECIES: PD40 domain-containing protein	RecName: Full=Uncharacterized protein YdjN; Flags: Precursor [Bacillus subtilis subsp. subtilis str. 168]	PF07676;PF07676	PD40;PD40	WD40-like Beta Propeller Repeat;WD40-like Beta Propeller Repeat	COG0823	Periplasmic component TolB of the Tol biopolymer transport system	-	-	-	-	-	-
gene0714	-	MULTISPECIES: DUF4003 domain-containing protein	RP01	Chromosome	Chromosome	-	712828	711836	993	MULTISPECIES: DUF4003 domain-containing protein	RecName: Full=Uncharacterized protein YeaA [Bacillus subtilis subsp. subtilis str. 168]	PF13170	DUF4003	Protein of unknown function (DUF4003)	-	-	-	-	-	-	-	-
gene0715	-	hypothetical protein	RP01	Chromosome	Chromosome	-	713231	712923	309	hypothetical protein	-	-	-	-	-	-	GO:0016021	integral component of membrane	-	-	-	-
gene0716	-	-	RP01	Chromosome	Chromosome	-	713605	713348	258	-	-	-	-	-	-	-	-	-	-	-	-	-
gene0717	lepB	MULTISPECIES: signal peptidase I	RP01	Chromosome	Chromosome	+	713896	714444	549	MULTISPECIES: signal peptidase I	RecName: Full=Signal peptidase I; Short=SPase I; AltName: Full=Leader peptidase I [[Bacillus] caldolyticus]	PF10502;PF00717	Peptidase_S26;Peptidase_S24	Signal peptidase, peptidase S26;Peptidase S24-like	COG0681	Signal peptidase I	GO:0016021;GO:0005886;GO:0004252	integral component of membrane;;plasma membrane;;serine-type endopeptidase activity	K03100	signal peptidase I [EC:3.4.21.89]	3.4.21.89	Hydrolases; Acting on peptide bonds (peptidases); Serine endopeptidases; signal peptidase I
gene0718	-	MULTISPECIES: hypothetical protein	RP01	Chromosome	Chromosome	+	714861	715124	264	MULTISPECIES: hypothetical protein	-	-	-	-	-	-	GO:0032259;GO:0016021;GO:0008168	methylation;;integral component of membrane;;methyltransferase activity	-	-	-	-
gene0719	-	MULTISPECIES: SDR family oxidoreductase	RP01	Chromosome	Chromosome	+	715481	716125	645	MULTISPECIES: SDR family oxidoreductase	RecName: Full=Uncharacterized sugar epimerase YhfK [Bacillus subtilis subsp. subtilis str. 168]	PF13460;PF05368;PF01370;PF01073;PF01113;PF01118;PF00056	NAD_binding_10;NmrA;Epimerase;3Beta_HSD;DapB_N;Semialdhyde_dh;Ldh_1_N	NAD(P)H-binding;NmrA-like family;NAD dependent epimerase/dehydratase family;3-beta hydroxysteroid dehydrogenase/isomerase family;Dihydrodipicolinate reductase, N-terminus;Semialdehyde dehydrogenase, NAD binding domain;lactate/malate dehydrogenase, NAD binding domain	COG0451	Nucleoside-diphosphate-sugar epimerase	-	-	-	-	-	-
gene0720	-	putative transcriptional regulator	RP01	Chromosome	Chromosome	-	717041	716169	873	putative transcriptional regulator	RecName: Full=Right origin-binding protein [Escherichia coli K-12] >lcl|P0ACI1.1 RecName: Full=Right origin-binding protein [Escherichia coli O157:H7] >lcl|P0ACI2.1 RecName: Full=Right origin-binding protein [Shigella flexneri]	PF14526;PF06445;PF12833;PF00165;PF00165	Cass2;GyrI-like;HTH_18;HTH_AraC;HTH_AraC	Integron-associated effector binding protein;GyrI-like small molecule binding domain;Helix-turn-helix domain;Bacterial regulatory helix-turn-helix proteins, AraC family;Bacterial regulatory helix-turn-helix proteins, AraC family	COG2207	AraC-type DNA-binding domain and AraC-containing proteins	-	-	K13653	AraC family transcriptional regulator	-	-
gene0721	cotA	MULTISPECIES: multicopper oxidase	RP01	Chromosome	Chromosome	-	718691	717150	1542	MULTISPECIES: multicopper oxidase	RecName: Full=Laccase; AltName: Full=Bilirubin oxidase; AltName: Full=Spore coat protein A [Bacillus subtilis subsp. subtilis str. 168]	PF07731;PF07732;PF07732;PF00394	Cu-oxidase_2;Cu-oxidase_3;Cu-oxidase_3;Cu-oxidase	Multicopper oxidase;Multicopper oxidase;Multicopper oxidase;Multicopper oxidase	COG2132	Multicopper oxidase with three cupredoxin domains (includes cell division protein FtsP and spore coat protein CotA)	-	-	K06324	spore coat protein A, manganese oxidase [EC:1.16.3.3]	1.16.3.3	Oxidoreductases; Oxidizing metal ions; With oxygen as acceptor; manganese(II):oxygen oxidoreductase
gene0722	-	MULTISPECIES: acyltransferase family protein	RP01	Chromosome	Chromosome	+	718966	719973	1008	MULTISPECIES: acyltransferase family protein	-	PF01757	Acyl_transf_3	Acyltransferase family	COG3594	Fucose 4-O-acetylase or related acetyltransferase	-	-	-	-	-	-
gene0723	-	hypothetical protein	RP01	Chromosome	Chromosome	-	720930	720010	921	hypothetical protein	-	PF11611;PF13273;PF16729	DUF4352;DUF4064;DUF5067	Domain of unknown function (DUF4352);Protein of unknown function (DUF4064);Domain of unknown function (DUF5067)	-	-	-	-	-	-	-	-
gene0724	-	MULTISPECIES: cation diffusion facilitator family transporter	RP01	Chromosome	Chromosome	+	721382	722254	873	MULTISPECIES: cation diffusion facilitator family transporter	RecName: Full=Manganese efflux system protein MneS [Bacillus subtilis subsp. subtilis str. 168]	PF01545;PF16916	Cation_efflux;ZT_dimer	Cation efflux family;Dimerisation domain of Zinc Transporter	COG0053	Divalent metal cation (Fe/Co/Zn/Cd) efflux pump	GO:0016021;GO:0008324	integral component of membrane;;cation transmembrane transporter activity	-	-	-	-
gene0725	moxR	MULTISPECIES: MoxR family ATPase	RP01	Chromosome	Chromosome	+	722410	723372	963	MULTISPECIES: MoxR family ATPase	RecName: Full=Uncharacterized protein YeaC [Bacillus subtilis subsp. subtilis str. 168]	PF07726;PF17863;PF07728;PF00004;PF00493	AAA_3;AAA_lid_2;AAA_5;AAA;MCM	ATPase family associated with various cellular activities (AAA);AAA lid domain;AAA domain (dynein-related subfamily);ATPase family associated with various cellular activities (AAA);MCM P-loop domain	COG0714	MoxR-like ATPase	GO:0005524;GO:0016887	ATP binding;;ATP hydrolysis activity	K03924	MoxR-like ATPase [EC:3.6.3.-]	-	-
gene0726	-	MULTISPECIES: DUF58 domain-containing protein	RP01	Chromosome	Chromosome	+	723372	724583	1212	MULTISPECIES: DUF58 domain-containing protein	RecName: Full=Uncharacterized protein YeaD [Bacillus subtilis subsp. subtilis str. 168]	PF01882	DUF58	Protein of unknown function DUF58	COG1721	Uncharacterized conserved protein, DUF58 family, contains vWF domain	GO:0016021	integral component of membrane	-	-	-	-
gene0727	-	MULTISPECIES: transglutaminase domain-containing protein	RP01	Chromosome	Chromosome	+	724588	726813	2226	MULTISPECIES: transglutaminase domain-containing protein	RecName: Full=Uncharacterized protein YebA [Bacillus subtilis subsp. subtilis str. 168]	PF01841;PF11992;PF13559	Transglut_core;TgpA_N;DUF4129	Transglutaminase-like superfamily;TgpA N-terminal domain;Domain of unknown function (DUF4129)	COG1305	Transglutaminase-like enzyme, putative cysteine protease	-	-	-	-	-	-
gene0728	guaA	MULTISPECIES: glutamine-hydrolyzing GMP synthase	RP01	Chromosome	Chromosome	+	727002	728543	1542	MULTISPECIES: glutamine-hydrolyzing GMP synthase	RecName: Full=GMP synthase [glutamine-hydrolyzing]; AltName: Full=GMP synthetase; AltName: Full=Glutamine amidotransferase [Bacillus licheniformis DSM 13 = ATCC 14580]	PF00117;PF00958;PF07722;PF02540;PF00733	GATase;GMP_synt_C;Peptidase_C26;NAD_synthase;Asn_synthase	Glutamine amidotransferase class-I;GMP synthase C terminal domain;Peptidase C26;NAD synthase;Asparagine synthase	COG0518	GMP synthase, glutamine amidotransferase domain	GO:0006541;GO:0005524;GO:0003922;GO:0016462	glutamine metabolic process;;ATP binding;;GMP synthase (glutamine-hydrolyzing) activity;;pyrophosphatase activity	K01951	GMP synthase (glutamine-hydrolysing) [EC:6.3.5.2]	6.3.5.2	Ligases; Forming carbon-nitrogen bonds; Carbon-nitrogen ligases with glutamine as amido-N-donor; xanthosine-5'-phosphate:L-glutamine amido-ligase (AMP-forming)
gene0729	-	hypothetical protein	RP01	Chromosome	Chromosome	+	728666	729136	471	hypothetical protein	-	-	-	-	-	-	-	-	-	-	-	-
gene0730	pbuG	MULTISPECIES: NCS2 family permease	RP01	Chromosome	Chromosome	+	729487	730809	1323	MULTISPECIES: NCS2 family permease	RecName: Full=Guanine/hypoxanthine permease PbuG [Bacillus subtilis subsp. subtilis str. 168]	PF00860	Xan_ur_permease	Permease family	COG2252	Xanthine/guanine/uracil/vitamin C permease GhxP/GhxQ, nucleobase:cation symporter 2 ( NCS2) family	-	-	K06901	adenine/guanine/hypoxanthine permease	-	-
gene0731	-	MULTISPECIES: hypothetical protein	RP01	Chromosome	Chromosome	+	731027	731782	756	MULTISPECIES: hypothetical protein	RecName: Full=Uncharacterized protein YebC [Bacillus subtilis subsp. subtilis str. 168]	-	-	-	-	-	GO:0016021	integral component of membrane	-	-	-	-
gene0732	-	MULTISPECIES: hypothetical protein	RP01	Chromosome	Chromosome	+	731891	732079	189	MULTISPECIES: hypothetical protein	-	-	-	-	-	-	-	-	-	-	-	-
gene0733	-	MULTISPECIES: DUF5698 domain-containing protein	RP01	Chromosome	Chromosome	+	732266	732820	555	MULTISPECIES: DUF5698 domain-containing protein	RecName: Full=UPF0316 protein BLi00691/BL01474 [Bacillus licheniformis DSM 13 = ATCC 14580]	PF18955;PF10035	DUF5698;DUF2179	Domain of unknown function (DUF5698);Uncharacterized protein conserved in bacteria (DUF2179)	COG4843	Uncharacterized conserved protein YebE, UPF0316/DUF2179 family	GO:0016021;GO:0005886	integral component of membrane;;plasma membrane	-	-	-	-
gene0734	-	MULTISPECIES: NETI motif-containing protein	RP01	Chromosome	Chromosome	+	732820	733017	198	MULTISPECIES: NETI motif-containing protein	RecName: Full=Uncharacterized protein YebG [Bacillus subtilis subsp. subtilis str. 168]	PF14044	NETI	NETI protein	-	-	-	-	-	-	-	-
gene0735	purE	MULTISPECIES: 5-(carboxyamino)imidazole ribonucleotide mutase	RP01	Chromosome	Chromosome	+	733335	733823	489	MULTISPECIES: 5-(carboxyamino)imidazole ribonucleotide mutase	RecName: Full=N5-carboxyaminoimidazole ribonucleotide mutase; Short=N5-CAIR mutase; AltName: Full=5-(carboxyamino)imidazole ribonucleotide mutase [Bacillus subtilis subsp. subtilis str. 168]	PF00731	AIRC	AIR carboxylase	COG0041	Phosphoribosylcarboxyaminoimidazole (NCAIR) mutase	GO:0006189;GO:0034023	'de novo' IMP biosynthetic process;;5-(carboxyamino)imidazole ribonucleotide mutase activity	K01588	5-(carboxyamino)imidazole ribonucleotide mutase [EC:5.4.99.18]	5.4.99.18	Isomerases; Intramolecular transferases; Transferring other groups; 5-carboxyamino-1-(5-phospho-D-ribosyl)imidazole carboxymutase
gene0736	purK	phosphoribosylaminoimidazole carboxylase ATPase subunit PurK	RP01	Chromosome	Chromosome	+	733765	734958	1194	phosphoribosylaminoimidazole carboxylase ATPase subunit PurK	RecName: Full=N5-carboxyaminoimidazole ribonucleotide synthase; Short=N5-CAIR synthase; AltName: Full=5-(carboxyamino)imidazole ribonucleotide synthetase [Bacillus subtilis subsp. subtilis str. 168]	PF02222;PF17769;PF07478	ATP-grasp;PurK_C;Dala_Dala_lig_C	ATP-grasp domain;Phosphoribosylaminoimidazole carboxylase C-terminal domain;D-ala D-ala ligase C-terminus	COG0026	Phosphoribosylaminoimidazole carboxylase (NCAIR synthetase)	-	-	K01589	5-(carboxyamino)imidazole ribonucleotide synthase [EC:6.3.4.18]	6.3.4.18	Ligases; Forming carbon-nitrogen bonds; Other carbon-nitrogen ligases; 5-amino-1-(5-phospho-D-ribosyl)imidazole:carbon-dioxide ligase (ADP-forming)
gene0737	purB	MULTISPECIES: adenylosuccinate lyase	RP01	Chromosome	Chromosome	+	734955	736250	1296	MULTISPECIES: adenylosuccinate lyase	RecName: Full=Adenylosuccinate lyase; Short=ASL; AltName: Full=Adenylosuccinase; Short=ASase; AltName: Full=Glutamyl--tRNA ligase regulatory factor [Bacillus subtilis subsp. subtilis str. 168]	PF00206;PF10397	Lyase_1;ADSL_C	Lyase;Adenylosuccinate lyase C-terminus	COG0015	Adenylosuccinate lyase	GO:0006189;GO:0044208;GO:0070626;GO:0004018	'de novo' IMP biosynthetic process;;'de novo' AMP biosynthetic process;;(S)-2-(5-amino-1-(5-phospho-D-ribosyl)imidazole-4-carboxamido)succinate AMP-lyase (fumarate-forming) activity;;N6-(1,2-dicarboxyethyl)AMP AMP-lyase (fumarate-forming) activity	K01756	adenylosuccinate lyase [EC:4.3.2.2]	4.3.2.2	Lyases; Carbon-nitrogen lyases; Amidine-lyases; N6-(1,2-dicarboxyethyl)AMP AMP-lyase (fumarate-forming)
gene0738	purC	MULTISPECIES: phosphoribosylaminoimidazolesuccinocarboxamide synthase	RP01	Chromosome	Chromosome	+	736325	737041	717	MULTISPECIES: phosphoribosylaminoimidazolesuccinocarboxamide synthase	RecName: Full=Phosphoribosylaminoimidazole-succinocarboxamide synthase; AltName: Full=SAICAR synthetase; AltName: Full=Vegetative protein 286A; Short=VEG286A [Bacillus subtilis subsp. subtilis str. 168]	PF01259	SAICAR_synt	SAICAR synthetase	COG0152	Phosphoribosylaminoimidazole-succinocarboxamide synthase	GO:0006189;GO:0009236;GO:0005524;GO:0004639	'de novo' IMP biosynthetic process;;cobalamin biosynthetic process;;ATP binding;;phosphoribosylaminoimidazolesuccinocarboxamide synthase activity	K01923	phosphoribosylaminoimidazole-succinocarboxamide synthase [EC:6.3.2.6]	6.3.2.6	Ligases; Forming carbon-nitrogen bonds; Acid-D-amino-acid ligases (peptide synthases); 5-amino-1-(5-phospho-D-ribosyl)imidazole-4-carboxylate:L-aspartate ligase (ADP-forming)
gene0739	purS	MULTISPECIES: phosphoribosylformylglycinamidine synthase subunit PurS	RP01	Chromosome	Chromosome	+	737043	737297	255	MULTISPECIES: phosphoribosylformylglycinamidine synthase subunit PurS	RecName: Full=Phosphoribosylformylglycinamidine synthase subunit PurS; Short=FGAM synthase; AltName: Full=Formylglycinamide ribonucleotide amidotransferase subunit III; Short=FGAR amidotransferase III; Short=FGAR-AT III; AltName: Full=Phosphoribosylformylglycinamidine synthase subunit III [Bacillus subtilis subsp. subtilis str. 168]	PF02700	PurS	Phosphoribosylformylglycinamidine (FGAM) synthase	COG1828	Phosphoribosylformylglycinamidine (FGAM) synthase, PurS subunit	GO:0006189;GO:0005737;GO:0005524;GO:0004642	'de novo' IMP biosynthetic process;;cytoplasm;;ATP binding;;phosphoribosylformylglycinamidine synthase activity	K23264	phosphoribosylformylglycinamidine synthase subunit PurS [EC:6.3.5.3]	6.3.5.3	Ligases; Forming carbon-nitrogen bonds; Carbon-nitrogen ligases with glutamine as amido-N-donor; N2-formyl-N1-(5-phospho-D-ribosyl)glycinamide:L-glutamine amido-ligase (ADP-forming)
gene0740	purQ	MULTISPECIES: phosphoribosylformylglycinamidine synthase subunit PurQ	RP01	Chromosome	Chromosome	+	737294	737977	684	MULTISPECIES: phosphoribosylformylglycinamidine synthase subunit PurQ	RecName: Full=Phosphoribosylformylglycinamidine synthase subunit PurQ; Short=FGAM synthase; AltName: Full=Formylglycinamide ribonucleotide amidotransferase subunit I; Short=FGAR amidotransferase I; Short=FGAR-AT I; AltName: Full=Glutaminase PurQ; AltName: Full=Phosphoribosylformylglycinamidine synthase subunit I [Bacillus licheniformis DSM 13 = ATCC 14580]	PF13507;PF07685;PF00117;PF01965	GATase_5;GATase_3;GATase;DJ-1_PfpI	CobB/CobQ-like glutamine amidotransferase domain;CobB/CobQ-like glutamine amidotransferase domain;Glutamine amidotransferase class-I;DJ-1/PfpI family	COG0047	Phosphoribosylformylglycinamidine (FGAM) synthase, glutamine amidotransferase domain	-	-	K23265	phosphoribosylformylglycinamidine synthase subunit PurQ / glutaminase [EC:6.3.5.3 3.5.1.2]	3.5.1.2;6.3.5.3	Hydrolases; Acting on carbon-nitrogen bonds, other than peptide bonds; In linear amides; L-glutamine amidohydrolase|Ligases; Forming carbon-nitrogen bonds; Carbon-nitrogen ligases with glutamine as amido-N-donor; N2-formyl-N1-(5-phospho-D-ribosyl)glycinamide:L-glutamine amido-ligase (ADP-forming)
gene0741	purL	MULTISPECIES: phosphoribosylformylglycinamidine synthase subunit PurL	RP01	Chromosome	Chromosome	+	737961	740189	2229	MULTISPECIES: phosphoribosylformylglycinamidine synthase subunit PurL	RecName: Full=Phosphoribosylformylglycinamidine synthase subunit PurL; Short=FGAM synthase; AltName: Full=Formylglycinamide ribonucleotide amidotransferase subunit II; Short=FGAR amidotransferase II; Short=FGAR-AT II; AltName: Full=Glutamine amidotransferase PurL; AltName: Full=Phosphoribosylformylglycinamidine synthase subunit II [Bacillus licheniformis DSM 13 = ATCC 14580]	PF00586;PF00586;PF02769;PF02769;PF18072	AIRS;AIRS;AIRS_C;AIRS_C;FGAR-AT_linker	AIR synthase related protein, N-terminal domain;AIR synthase related protein, N-terminal domain;AIR synthase related protein, C-terminal domain;AIR synthase related protein, C-terminal domain;Formylglycinamide ribonucleotide amidotransferase linker domain	COG0046	Phosphoribosylformylglycinamidine (FGAM) synthase, synthetase domain	-	-	K23269	phosphoribosylformylglycinamidine synthase subunit PurL [EC:6.3.5.3]	6.3.5.3	Ligases; Forming carbon-nitrogen bonds; Carbon-nitrogen ligases with glutamine as amido-N-donor; N2-formyl-N1-(5-phospho-D-ribosyl)glycinamide:L-glutamine amido-ligase (ADP-forming)
gene0742	purF	MULTISPECIES: amidophosphoribosyltransferase	RP01	Chromosome	Chromosome	+	740165	741595	1431	MULTISPECIES: amidophosphoribosyltransferase	RecName: Full=Amidophosphoribosyltransferase; Short=ATase; AltName: Full=Glutamine phosphoribosylpyrophosphate amidotransferase; Short=GPATase; Flags: Precursor [Bacillus subtilis subsp. subtilis str. 168]	PF13522;PF13537;PF00156;PF13230	GATase_6;GATase_7;Pribosyltran;GATase_4	Glutamine amidotransferase domain;Glutamine amidotransferase domain;Phosphoribosyl transferase domain;Glutamine amidotransferases class-II	COG0034	Glutamine phosphoribosylpyrophosphate amidotransferase	-	-	K00764	amidophosphoribosyltransferase [EC:2.4.2.14]	2.4.2.14	Transferases; Glycosyltransferases; Pentosyltransferases; 5-phospho-beta-D-ribosylamine:diphosphate phospho-alpha-D-ribosyltransferase (glutamate-amidating)
gene0743	purM	Phosphoribosylformylglycinamidine cyclo-ligase	RP01	Chromosome	Chromosome	+	741717	742760	1044	Phosphoribosylformylglycinamidine cyclo-ligase	RecName: Full=Phosphoribosylformylglycinamidine cyclo-ligase; AltName: Full=AIR synthase; AltName: Full=AIRS; AltName: Full=Phosphoribosyl-aminoimidazole synthetase [Bacillus licheniformis DSM 13 = ATCC 14580]	PF02769;PF00586	AIRS_C;AIRS	AIR synthase related protein, C-terminal domain;AIR synthase related protein, N-terminal domain	COG0150	Phosphoribosylaminoimidazole (AIR) synthetase	-	-	K01933	phosphoribosylformylglycinamidine cyclo-ligase [EC:6.3.3.1]	6.3.3.1	Ligases; Forming carbon-nitrogen bonds; Cyclo-ligases; 2-(formamido)-N1-(5-phosphoribosyl)acetamidine cyclo-ligase (ADP-forming)
gene0744	purN	MULTISPECIES: phosphoribosylglycinamide formyltransferase	RP01	Chromosome	Chromosome	+	742757	743344	588	MULTISPECIES: phosphoribosylglycinamide formyltransferase	RecName: Full=Phosphoribosylglycinamide formyltransferase; AltName: Full=5'-phosphoribosylglycinamide transformylase; AltName: Full=GAR transformylase; Short=GART [Bacillus subtilis subsp. subtilis str. 168]	PF00551	Formyl_trans_N	Formyl transferase	COG0299	Folate-dependent phosphoribosylglycinamide formyltransferase PurN	GO:0006189;GO:0004644	'de novo' IMP biosynthetic process;;phosphoribosylglycinamide formyltransferase activity	K11175	phosphoribosylglycinamide formyltransferase 1 [EC:2.1.2.2]	2.1.2.2	Transferases; Transferring one-carbon groups; Hydroxymethyl-, formyl- and related transferases; 10-formyltetrahydrofolate:5'-phosphoribosylglycinamide N-formyltransferase
gene0745	purH	MULTISPECIES: bifunctional phosphoribosylaminoimidazolecarboxamide formyltransferase/IMP cyclohydrolase	RP01	Chromosome	Chromosome	+	743341	744879	1539	MULTISPECIES: bifunctional phosphoribosylaminoimidazolecarboxamide formyltransferase/IMP cyclohydrolase	RecName: Full=Bifunctional purine biosynthesis protein PurH; Includes: RecName: Full=Phosphoribosylaminoimidazolecarboxamide formyltransferase; AltName: Full=AICAR transformylase; Includes: RecName: Full=IMP cyclohydrolase; AltName: Full=ATIC; AltName: Full=IMP synthase; AltName: Full=Inosinicase [Bacillus subtilis subsp. subtilis str. 168]	PF01808;PF02142	AICARFT_IMPCHas;MGS	AICARFT/IMPCHase bienzyme;MGS-like domain	COG0138	AICAR transformylase/IMP cyclohydrolase PurH	GO:0006189;GO:0003937;GO:0004643	'de novo' IMP biosynthetic process;;IMP cyclohydrolase activity;;phosphoribosylaminoimidazolecarboxamide formyltransferase activity	K00602	phosphoribosylaminoimidazolecarboxamide formyltransferase / IMP cyclohydrolase [EC:2.1.2.3 3.5.4.10]	3.5.4.10;2.1.2.3	Hydrolases; Acting on carbon-nitrogen bonds, other than peptide bonds; In cyclic amidines; IMP 1,2-hydrolase (ring-opening)|Transferases; Transferring one-carbon groups; Hydroxymethyl-, formyl- and related transferases; 10-formyltetrahydrofolate:5'-phosphoribosyl-5-amino-4-imidazole-carboxamide N-formyltransferase
gene0746	purD	MULTISPECIES: phosphoribosylamine--glycine ligase	RP01	Chromosome	Chromosome	+	744893	746161	1269	MULTISPECIES: phosphoribosylamine--glycine ligase	RecName: Full=Phosphoribosylamine--glycine ligase; AltName: Full=GARS; AltName: Full=Glycinamide ribonucleotide synthetase; AltName: Full=Phosphoribosylglycinamide synthetase [Bacillus subtilis subsp. subtilis str. 168]	PF01071;PF02844;PF02843;PF02655;PF02786;PF02222	GARS_A;GARS_N;GARS_C;ATP-grasp_3;CPSase_L_D2;ATP-grasp	Phosphoribosylglycinamide synthetase, ATP-grasp (A) domain;Phosphoribosylglycinamide synthetase, N domain;Phosphoribosylglycinamide synthetase, C domain;ATP-grasp domain;Carbamoyl-phosphate synthase L chain, ATP binding domain;ATP-grasp domain	COG0151	Phosphoribosylamine-glycine ligase	-	-	K01945	phosphoribosylamine---glycine ligase [EC:6.3.4.13]	6.3.4.13	Ligases; Forming carbon-nitrogen bonds; Other carbon-nitrogen ligases; 5-phospho-D-ribosylamine:glycine ligase (ADP-forming)
gene0747	-	MULTISPECIES: TetR/AcrR family transcriptional regulator	RP01	Chromosome	Chromosome	-	746789	746211	579	MULTISPECIES: TetR/AcrR family transcriptional regulator	RecName: Full=Uncharacterized HTH-type transcriptional regulator YxbF [Bacillus subtilis subsp. subtilis str. 168]	PF14278;PF00440	TetR_C_8;TetR_N	Transcriptional regulator C-terminal region;Bacterial regulatory proteins, tetR family	COG1309	DNA-binding protein, AcrR family, includes nucleoid occlusion protein SlmA	-	-	-	-	-	-
gene0748	-	MULTISPECIES: cytochrome P450	RP01	Chromosome	Chromosome	+	746927	748150	1224	MULTISPECIES: cytochrome P450	RecName: Full=Putative cytochrome P450 YjiB [Bacillus subtilis subsp. subtilis str. 168]	PF00067	p450	Cytochrome P450	COG2124	Cytochrome P450	-	-	K23138	cytochrome P450 family 109 [EC:1.14.-.-]	-	-
gene0749	-	Fe3+ hydroxamate ABC transporter substrate-binding protein	RP01	Chromosome	Chromosome	+	748252	748422	171	Fe3+ hydroxamate ABC transporter substrate-binding protein	-	-	-	-	-	-	-	-	-	-	-	-
gene0750	-	hypothetical protein	RP01	Chromosome	Chromosome	+	748814	748924	111	hypothetical protein	-	-	-	-	-	-	-	-	-	-	-	-
gene0751	-	MULTISPECIES: DUF6376 family protein	RP01	Chromosome	Chromosome	+	748936	749382	447	MULTISPECIES: DUF6376 family protein	RecName: Full=Uncharacterized lipoprotein YybP; Flags: Precursor [Bacillus subtilis subsp. subtilis str. 168]	PF19903	DUF6376	Family of unknown function (DUF6376)	-	-	-	-	-	-	-	-
gene0752	-	hypothetical protein	RP01	Chromosome	Chromosome	+	749499	749624	126	hypothetical protein	-	-	-	-	-	-	-	-	-	-	-	-
gene0753	-	MULTISPECIES: DUF2892 domain-containing protein	RP01	Chromosome	Chromosome	-	750192	749962	231	MULTISPECIES: DUF2892 domain-containing protein	RecName: Full=Uncharacterized membrane protein YezF [Bacillus subtilis subsp. subtilis str. 168]	PF11127	DUF2892	Protein of unknown function (DUF2892)	-	-	GO:0016021	integral component of membrane	-	-	-	-
gene0754	ade	amidohydrolase family protein	RP01	Chromosome	Chromosome	+	750318	752057	1740	amidohydrolase family protein	RecName: Full=Putative adenine deaminase YerA; Short=Adenase; Short=Adenine aminase [Bacillus subtilis subsp. subtilis str. 168]	PF13382;PF01979	Adenine_deam_C;Amidohydro_1	Adenine deaminase C-terminal domain;Amidohydrolase family	COG1001	Adenine deaminase	GO:0000034	adenine deaminase activity	K01486	adenine deaminase [EC:3.5.4.2]	3.5.4.2	Hydrolases; Acting on carbon-nitrogen bonds, other than peptide bonds; In cyclic amidines; adenine aminohydrolase
gene0755	-	MULTISPECIES: DUF3048 domain-containing protein	RP01	Chromosome	Chromosome	+	752083	753072	990	MULTISPECIES: DUF3048 domain-containing protein	RecName: Full=Putative lipoprotein YerB; Flags: Precursor [Bacillus subtilis subsp. subtilis str. 168]	PF11258;PF17479	DUF3048;DUF3048_C	Protein of unknown function (DUF3048) N-terminal domain;Protein of unknown function (DUF3048) C-terminal domain	-	-	-	-	-	-	-	-
gene0756	-	MULTISPECIES: hypothetical protein	RP01	Chromosome	Chromosome	+	753075	753386	312	MULTISPECIES: hypothetical protein	RecName: Full=Uncharacterized protein YerC [Bacillus subtilis subsp. subtilis str. 168]	PF01371	Trp_repressor	Trp repressor protein	COG4496	Predicted DNA-binding transcriptional regulator YerC, contains ArsR-like HTH domain	GO:0003700;GO:0043565	DNA-binding transcription factor activity;;sequence-specific DNA binding	-	-	-	-
gene0757	pcrB	MULTISPECIES: heptaprenylglyceryl phosphate synthase	RP01	Chromosome	Chromosome	+	753537	754223	687	MULTISPECIES: heptaprenylglyceryl phosphate synthase	RecName: Full=Heptaprenylglyceryl phosphate synthase; Short=HepGP synthase; AltName: Full=Glycerol-1-phosphate heptaprenyltransferase [Bacillus licheniformis DSM 13 = ATCC 14580]	PF01884	PcrB	PcrB family	COG1646	Glycerol-1-phosphate heptaprenyltransferase	-	-	K07094	heptaprenylglyceryl phosphate synthase [EC:2.5.1.-]	-	-
gene0758	uvrD	MULTISPECIES: DNA helicase PcrA	RP01	Chromosome	Chromosome	+	754283	756502	2220	MULTISPECIES: DNA helicase PcrA	RecName: Full=ATP-dependent DNA helicase PcrA [Bacillus subtilis subsp. subtilis str. 168]	PF00580;PF13361;PF13245;PF13538	UvrD-helicase;UvrD_C;AAA_19;UvrD_C_2	UvrD/REP helicase N-terminal domain;UvrD-like helicase C-terminal domain;AAA domain;UvrD-like helicase C-terminal domain	COG0210	Superfamily I DNA or RNA helicase	GO:0006268;GO:0005737;GO:0005524;GO:0003677;GO:0016787;GO:0003678	DNA unwinding involved in DNA replication;;cytoplasm;;ATP binding;;DNA binding;;hydrolase activity;;DNA helicase activity	K03657	DNA helicase II / ATP-dependent DNA helicase PcrA [EC:3.6.4.12]	3.6.4.12	Hydrolases; Acting on acid anhydrides; Acting on acid anhydrides to facilitate cellular and subcellular movement; ATP phosphohydrolase (DNA helix unwinding)
gene0759	ligA	MULTISPECIES: NAD-dependent DNA ligase LigA	RP01	Chromosome	Chromosome	+	756537	758540	2004	MULTISPECIES: NAD-dependent DNA ligase LigA	RecName: Full=DNA ligase; AltName: Full=Polydeoxyribonucleotide synthase [NAD(+)] [Bacillus licheniformis DSM 13 = ATCC 14580]	PF01653;PF03120;PF12826;PF14520;PF14520;PF00533;PF03119;PF12738	DNA_ligase_aden;DNA_ligase_OB;HHH_2;HHH_5;HHH_5;BRCT;DNA_ligase_ZBD;PTCB-BRCT	NAD-dependent DNA ligase adenylation domain;NAD-dependent DNA ligase OB-fold domain;Helix-hairpin-helix motif;Helix-hairpin-helix domain;Helix-hairpin-helix domain;BRCA1 C Terminus (BRCT) domain;NAD-dependent DNA ligase C4 zinc finger domain;twin BRCT domain	COG0272	NAD-dependent DNA ligase	-	-	K01972	DNA ligase (NAD+) [EC:6.5.1.2]	6.5.1.2	Ligases; Forming phosphoric-ester bonds; Ligases that form phosphoric-ester bonds (only sub-subclass identified to date); poly(deoxyribonucleotide)-3'-hydroxyl:5'-phospho-poly(deoxyribonucleotide) ligase (NAD+)
gene0760	-	MULTISPECIES: CamS family sex pheromone protein	RP01	Chromosome	Chromosome	+	758556	759746	1191	MULTISPECIES: CamS family sex pheromone protein	RecName: Full=Uncharacterized lipoprotein YerH; Flags: Precursor [Bacillus subtilis subsp. subtilis str. 168]	PF07537	CamS	CamS sex pheromone cAM373 precursor	COG4851	Uncharacterized conserved protein involved in sex pheromone biosynthesis	-	-	-	-	-	-
gene0761	-	MULTISPECIES: hypothetical protein	RP01	Chromosome	Chromosome	+	759938	760864	927	MULTISPECIES: hypothetical protein	RecName: Full=Uncharacterized protein YhfZ [Escherichia coli K-12]	PF14503;PF14502	YhfZ_C;HTH_41	YhfZ C-terminal domain;Helix-turn-helix domain	COG1725	DNA-binding transcriptional regulator YhcF, GntR family	-	-	-	-	-	-
gene0762	-	MULTISPECIES: PRD domain-containing protein	RP01	Chromosome	Chromosome	+	760960	761325	366	MULTISPECIES: PRD domain-containing protein	-	PF00874	PRD	PRD domain	-	-	GO:0006355	regulation of transcription, DNA-templated	-	-	-	-
gene0763	-	MULTISPECIES: DUF2620 domain-containing protein	RP01	Chromosome	Chromosome	+	761338	761697	360	MULTISPECIES: DUF2620 domain-containing protein	RecName: Full=Uncharacterized protein YhfU [Escherichia coli K-12] >lcl|P64632.2 RecName: Full=Uncharacterized protein YhfU [Escherichia coli CFT073] >lcl|P64633.2 RecName: Full=Uncharacterized protein YhfU [Shigella flexneri]	PF10941	DUF2620	Protein of unknown function DUF2620	-	-	-	-	-	-	-	-
gene0764	-	MULTISPECIES: YhfT family protein	RP01	Chromosome	Chromosome	+	761843	763144	1302	MULTISPECIES: YhfT family protein	RecName: Full=Uncharacterized protein YhfT [Escherichia coli K-12]	PF10797	YhfT	Protein of unknown function	-	-	GO:0016021	integral component of membrane	-	-	-	-
gene0765	php	MULTISPECIES: TatD family hydrolase	RP01	Chromosome	Chromosome	+	763171	764055	885	MULTISPECIES: TatD family hydrolase	RecName: Full=Phosphotriesterase homology protein [Escherichia coli K-12]	PF02126;PF01026	PTE;TatD_DNase	Phosphotriesterase family;TatD related DNase	COG1735	Predicted metal-dependent hydrolase, phosphotriesterase family	GO:0009056;GO:0008270	catabolic process;;zinc ion binding	K07048	phosphotriesterase-related protein	-	-
gene0766	-	MULTISPECIES: aminotransferase class V-fold PLP-dependent enzyme	RP01	Chromosome	Chromosome	+	764052	765200	1149	MULTISPECIES: aminotransferase class V-fold PLP-dependent enzyme	RecName: Full=Uncharacterized protein YhfS [Escherichia coli K-12]	PF00266;PF01053;PF01041	Aminotran_5;Cys_Met_Meta_PP;DegT_DnrJ_EryC1	Aminotransferase class-V;Cys/Met metabolism PLP-dependent enzyme;DegT/DnrJ/EryC1/StrS aminotransferase family	COG0399	dTDP-4-amino-4,6-dideoxygalactose transaminase	GO:0008483	transaminase activity	-	-	-	-
gene0767	deoB	MULTISPECIES: phosphopentomutase	RP01	Chromosome	Chromosome	+	765193	766419	1227	MULTISPECIES: phosphopentomutase	RecName: Full=Uncharacterized protein YhfW [Escherichia coli K-12]	PF01676	Metalloenzyme	Metalloenzyme superfamily	COG1015	Phosphopentomutase	GO:0009117;GO:0043094;GO:0005737;GO:0000287;GO:0008973	nucleotide metabolic process;;cellular metabolic compound salvage;;cytoplasm;;magnesium ion binding;;phosphopentomutase activity	K01839	phosphopentomutase [EC:5.4.2.7]	5.4.2.7	Isomerases; Intramolecular transferases; Phosphotransferases (phosphomutases); alpha-D-ribose 1,5-phosphomutase
gene0768	-	MULTISPECIES: YhfX family PLP-dependent enzyme	RP01	Chromosome	Chromosome	+	766419	767570	1152	MULTISPECIES: YhfX family PLP-dependent enzyme	RecName: Full=Uncharacterized protein YhfX [Escherichia coli K-12]	PF01168	Ala_racemase_N	Alanine racemase, N-terminal domain	COG3457	Predicted amino acid racemase	-	-	-	-	-	-
gene0769	nagB	MULTISPECIES: glucosamine-6-phosphate deaminase	RP01	Chromosome	Chromosome	+	767713	768441	729	MULTISPECIES: glucosamine-6-phosphate deaminase	RecName: Full=Glucosamine-6-phosphate deaminase; AltName: Full=GlcN6P deaminase; Short=GNPDA; AltName: Full=Glucosamine-6-phosphate isomerase [Oceanobacillus iheyensis HTE831]	PF01182	Glucosamine_iso	Glucosamine-6-phosphate isomerases/6-phosphogluconolactonase	COG0363	6-phosphogluconolactonase/Glucosamine-6-phosphate isomerase/deaminase	GO:0005975;GO:0019262;GO:0006044;GO:0004342	carbohydrate metabolic process;;N-acetylneuraminate catabolic process;;N-acetylglucosamine metabolic process;;glucosamine-6-phosphate deaminase activity	K02564	glucosamine-6-phosphate deaminase [EC:3.5.99.6]	3.5.99.6	Hydrolases; Acting on carbon-nitrogen bonds, other than peptide bonds; In other compounds; 2-amino-2-deoxy-alpha-D-glucose-6-phosphate aminohydrolase (ketol isomerizing)
gene0770	mgtC	membrane component SapB	RP01	Chromosome	Chromosome	-	769396	768704	693	membrane component SapB	RecName: Full=Protein SapB [Bacillus subtilis subsp. subtilis str. 168]	PF02308	MgtC	MgtC family	COG1285	Magnesium uptake protein YhiD/SapB, involved in acid resistance	GO:0032259;GO:0016021;GO:0005886;GO:0008168	methylation;;integral component of membrane;;plasma membrane;;methyltransferase activity	K07507	putative Mg2+ transporter-C (MgtC) family protein	-	-
gene0771	-	MULTISPECIES: sodium/proline symporter PutP	RP01	Chromosome	Chromosome	-	771097	769616	1482	MULTISPECIES: sodium/proline symporter PutP	RecName: Full=Osmoregulated proline transporter OpuE; AltName: Full=Osmoprotectant uptake; AltName: Full=Proline uptake system [Bacillus subtilis subsp. subtilis str. 168]	PF00474	SSF	Sodium:solute symporter family	COG0591	Na+/proline symporter	GO:0015824;GO:0016021;GO:0005886;GO:0005298;GO:0031402	proline transport;;integral component of membrane;;plasma membrane;;proline:sodium symporter activity;;sodium ion binding	K03307	solute:Na+ symporter, SSS family	-	-
gene0772	gatC	MULTISPECIES: Asp-tRNA(Asn)/Glu-tRNA(Gln) amidotransferase subunit GatC	RP01	Chromosome	Chromosome	+	771539	771829	291	MULTISPECIES: Asp-tRNA(Asn)/Glu-tRNA(Gln) amidotransferase subunit GatC	RecName: Full=Aspartyl/glutamyl-tRNA(Asn/Gln) amidotransferase subunit C; Short=Asp/Glu-ADT subunit C [Bacillus licheniformis DSM 13 = ATCC 14580]	PF02686	Glu-tRNAGln	Glu-tRNAGln amidotransferase C subunit	COG0721	Asp-tRNAAsn/Glu-tRNAGln amidotransferase C subunit	GO:0006412;GO:0006450;GO:0005524;GO:0016740;GO:0050567;GO:0050566	translation;;regulation of translational fidelity;;ATP binding;;transferase activity;;glutaminyl-tRNA synthase (glutamine-hydrolyzing) activity;;asparaginyl-tRNA synthase (glutamine-hydrolyzing) activity	K02435	aspartyl-tRNA(Asn)/glutamyl-tRNA(Gln) amidotransferase subunit C [EC:6.3.5.6 6.3.5.7]	6.3.5.7;6.3.5.6	Ligases; Forming carbon-nitrogen bonds; Carbon-nitrogen ligases with glutamine as amido-N-donor; L-glutamyl-tRNAGln:L-glutamine amido-ligase (ADP-forming)|Ligases; Forming carbon-nitrogen bonds; Carbon-nitrogen ligases with glutamine as amido-N-donor; L-aspartyl-tRNAAsn:L-glutamine amido-ligase (ADP-forming)
gene0773	gatA	MULTISPECIES: Asp-tRNA(Asn)/Glu-tRNA(Gln) amidotransferase subunit GatA	RP01	Chromosome	Chromosome	+	771852	773309	1458	MULTISPECIES: Asp-tRNA(Asn)/Glu-tRNA(Gln) amidotransferase subunit GatA	RecName: Full=Glutamyl-tRNA(Gln) amidotransferase subunit A; Short=Glu-ADT subunit A [Bacillus licheniformis DSM 13 = ATCC 14580]	PF01425	Amidase	Amidase	COG0154	Asp-tRNAAsn/Glu-tRNAGln amidotransferase A subunit or related amidase	GO:0006412;GO:0030956;GO:0005524;GO:0016787;GO:0016740;GO:0050567	translation;;glutamyl-tRNA(Gln) amidotransferase complex;;ATP binding;;hydrolase activity;;transferase activity;;glutaminyl-tRNA synthase (glutamine-hydrolyzing) activity	K02433	aspartyl-tRNA(Asn)/glutamyl-tRNA(Gln) amidotransferase subunit A [EC:6.3.5.6 6.3.5.7]	6.3.5.6;6.3.5.7	Ligases; Forming carbon-nitrogen bonds; Carbon-nitrogen ligases with glutamine as amido-N-donor; L-aspartyl-tRNAAsn:L-glutamine amido-ligase (ADP-forming)|Ligases; Forming carbon-nitrogen bonds; Carbon-nitrogen ligases with glutamine as amido-N-donor; L-glutamyl-tRNAGln:L-glutamine amido-ligase (ADP-forming)
gene0774	gatB	MULTISPECIES: Asp-tRNA(Asn)/Glu-tRNA(Gln) amidotransferase subunit GatB	RP01	Chromosome	Chromosome	+	773323	774753	1431	MULTISPECIES: Asp-tRNA(Asn)/Glu-tRNA(Gln) amidotransferase subunit GatB	RecName: Full=Aspartyl/glutamyl-tRNA(Asn/Gln) amidotransferase subunit B; Short=Asp/Glu-ADT subunit B [Bacillus licheniformis DSM 13 = ATCC 14580]	PF02934;PF02637	GatB_N;GatB_Yqey	GatB/GatE catalytic domain;GatB domain	COG0064	Asp-tRNAAsn/Glu-tRNAGln amidotransferase B subunit	GO:0006412;GO:0005524;GO:0016740;GO:0050567;GO:0050566	translation;;ATP binding;;transferase activity;;glutaminyl-tRNA synthase (glutamine-hydrolyzing) activity;;asparaginyl-tRNA synthase (glutamine-hydrolyzing) activity	K02434	aspartyl-tRNA(Asn)/glutamyl-tRNA(Gln) amidotransferase subunit B [EC:6.3.5.6 6.3.5.7]	6.3.5.6;6.3.5.7	Ligases; Forming carbon-nitrogen bonds; Carbon-nitrogen ligases with glutamine as amido-N-donor; L-aspartyl-tRNAAsn:L-glutamine amido-ligase (ADP-forming)|Ligases; Forming carbon-nitrogen bonds; Carbon-nitrogen ligases with glutamine as amido-N-donor; L-glutamyl-tRNAGln:L-glutamine amido-ligase (ADP-forming)
gene0775	-	MULTISPECIES: DUF2089 family protein	RP01	Chromosome	Chromosome	+	774921	775223	303	MULTISPECIES: DUF2089 family protein	-	PF09862	DUF2089	Protein of unknown function (DUF2089)	COG3877	Predicted DNA-binding transcriptional regulator with XRE-family HTH domain, DUF2089 family	-	-	-	-	-	-
gene0776	-	MULTISPECIES: hypothetical protein	RP01	Chromosome	Chromosome	+	775220	775501	282	MULTISPECIES: hypothetical protein	-	-	-	-	-	-	GO:0016021	integral component of membrane	-	-	-	-
gene0777	gmuG	MULTISPECIES: glycoside hydrolase family 26 protein	RP01	Chromosome	Chromosome	-	776656	775574	1083	MULTISPECIES: glycoside hydrolase family 26 protein	RecName: Full=Mannan endo-1,4-beta-mannosidase; AltName: Full=1,4-beta-D-mannan mannanohydrolase; AltName: Full=Beta-mannanase; AltName: Full=Glucomannan utilization protein G; Flags: Precursor [Bacillus subtilis subsp. subtilis str. 168]	PF02156	Glyco_hydro_26	Glycosyl hydrolase family 26	COG4124	Beta-mannanase	-	-	K01218	mannan endo-1,4-beta-mannosidase [EC:3.2.1.78]	3.2.1.78	Hydrolases; Glycosylases; Glycosidases, i.e. enzymes that hydrolyse O- and S-glycosyl compounds; 4-beta-D-mannan mannanohydrolase
gene0778	-	MULTISPECIES: TetR/AcrR family transcriptional regulator	RP01	Chromosome	Chromosome	-	777628	776780	849	MULTISPECIES: TetR/AcrR family transcriptional regulator	RecName: Full=Uncharacterized HTH-type transcriptional regulator YerO [Bacillus subtilis subsp. subtilis str. 168]	PF00440	TetR_N	Bacterial regulatory proteins, tetR family	COG1309	DNA-binding protein, AcrR family, includes nucleoid occlusion protein SlmA	GO:0003677	DNA binding	-	-	-	-
gene0779	-	efflux RND transporter permease subunit	RP01	Chromosome	Chromosome	+	777775	780933	3159	efflux RND transporter permease subunit	RecName: Full=Swarming motility protein SwrC [Bacillus subtilis subsp. subtilis str. 168]	PF00873;PF03176;PF02355;PF02355	ACR_tran;MMPL;SecD_SecF;SecD_SecF	AcrB/AcrD/AcrF family;MMPL family;Protein export membrane protein;Protein export membrane protein	COG0841	Multidrug efflux pump subunit AcrB	-	-	K03296	hydrophobic/amphiphilic exporter-1 (mainly G- bacteria), HAE1 family	-	-
gene0780	-	MULTISPECIES: hypothetical protein	RP01	Chromosome	Chromosome	+	781065	781265	201	MULTISPECIES: hypothetical protein	-	-	-	-	-	-	GO:0016021	integral component of membrane	-	-	-	-
[truncated: 3,494 more rows]
