# Supplementary material for: Bacillus paralicheniformis RP01 Enhances the Expression of Growth-Related Genes in Cotton and Promotes Plant Growth by Altering Microbiota inside and outside the Root
Source: Int J Mol Sci. 2023 Apr 13;24(8):7227. doi: 10.3390/ijms24087227 (PMC10138817; doi:10.3390/ijms24087227)
Supplement: Supplementary file 1 [file ijms-24-07227-s001.zip › Supplementary file Table S6.xlsx]

## Sheet: Supplementary file Table S6
Table S6: Carbohydrate-active enzyme annotation prediction in RP01
(A.) Carbohydrate-active enzyme categorical statistics in RP01.
Class Definition	Genes No.
Auxiliary Activities	6
Carbohydrate-Binding Modules	2
Carbohydrate Esterases	36
Glycoside Hydrolases	64
Glycosyl Transferases	42
Polysaccharide Lyases	9
(B.) Gene detail tables of carbohydrate-active enzyme prediction.
Gene ID	Location	Sample Name	Family	Family Description	Class	Class Description	Coverage(%)	Evalue
gene0025	Chromosome	RP01	GH18	chitinase (EC 3.2.1.14); lysozyme (EC 3.2.1.17); endo-beta-N-acetylglucosaminidase (EC 3.2.1.96); peptidoglycan hydrolase with endo-beta-N-acetylglucosaminidase specificity (EC 3.2.1.-); Nod factor hydrolase (EC 3.2.1.-); xylanase inhibitor; concanavalin B; narbonin	GH	Glycoside Hydrolases	0.57	2.5e-42
gene0222	Chromosome	RP01	GH3	beta-glucosidase (EC 3.2.1.21); xylan 1,4-beta-xylosidase (EC 3.2.1.37); beta-glucosylceramidase (EC 3.2.1.45); beta-N-acetylhexosaminidase (EC 3.2.1.52); alpha-L-arabinofuranosidase (EC 3.2.1.55); glucan 1,3-beta-glucosidase (EC 3.2.1.58); glucan 1,4-beta-glucosidase (EC 3.2.1.74); isoprimeverose-producing oligoxyloglucan hydrolase (EC 3.2.1.120); coniferin beta-glucosidase (EC 3.2.1.126); exo-1…	GH	Glycoside Hydrolases	0.37	1.3e-68
gene0366	Chromosome	RP01	GH4	maltose-6-phosphate glucosidase (EC 3.2.1.122); alpha-glucosidase (EC 3.2.1.20); alpha-galactosidase (EC 3.2.1.22); 6-phospho-beta-glucosidase (EC 3.2.1.86); alpha-glucuronidase (EC 3.2.1.139); alpha-galacturonase (EC 3.2.1.67); palatinase (EC 3.2.1.-)	GH	Glycoside Hydrolases	0.41	3e-76
gene0369	Chromosome	RP01	GH18	chitinase (EC 3.2.1.14); lysozyme (EC 3.2.1.17); endo-beta-N-acetylglucosaminidase (EC 3.2.1.96); peptidoglycan hydrolase with endo-beta-N-acetylglucosaminidase specificity (EC 3.2.1.-); Nod factor hydrolase (EC 3.2.1.-); xylanase inhibitor; concanavalin B; narbonin	GH	Glycoside Hydrolases	0.67	5.5e-90
gene0370	Chromosome	RP01	GH18	chitinase (EC 3.2.1.14); lysozyme (EC 3.2.1.17); endo-beta-N-acetylglucosaminidase (EC 3.2.1.96); peptidoglycan hydrolase with endo-beta-N-acetylglucosaminidase specificity (EC 3.2.1.-); Nod factor hydrolase (EC 3.2.1.-); xylanase inhibitor; concanavalin B; narbonin	GH	Glycoside Hydrolases	0.66	2.2e-71
gene0417	Chromosome	RP01	GH1	beta-glucosidase (EC 3.2.1.21); beta-galactosidase (EC 3.2.1.23); beta-mannosidase (EC 3.2.1.25); beta-glucuronidase (EC 3.2.1.31); beta-xylosidase (EC 3.2.1.37); beta-D-fucosidase (EC 3.2.1.38); phlorizin hydrolase (EC 3.2.1.62); exo-beta-1,4-glucanase (EC 3.2.1.74); 6-phospho-beta-galactosidase (EC 3.2.1.85); 6-phospho-beta-glucosidase (EC 3.2.1.86); strictosidine beta-glucosidase (EC 3.2.1.105…	GH	Glycoside Hydrolases	0.98	6.6e-168
gene0472	Chromosome	RP01	GH42	beta-galactosidase (EC 3.2.1.23); alpha-L-arabinopyranosidase (EC 3.2.1.-)	GH	Glycoside Hydrolases	0.54	1.5e-161
gene0606	Chromosome	RP01	GH11	endo-beta-1,4-xylanase (EC 3.2.1.8); endo-beta-1,3-xylanase (EC 3.2.1.32)	GH	Glycoside Hydrolases	0.85	5.2e-72
gene0697	Chromosome	RP01	GH13_5	GH13's subfamily	GH	Glycoside Hydrolases	0.61	2.6e-155
gene0700	Chromosome	RP01	GH13_20	GH13's subfamily	GH	Glycoside Hydrolases	0.5	5.9e-137
gene0705	Chromosome	RP01	GH65	alpha,alpha-trehalase (EC 3.2.1.28); maltose phosphorylase (EC 2.4.1.8); trehalose phosphorylase (EC 2.4.1.64); kojibiose phosphorylase (EC 2.4.1.230); trehalose-6-phosphate phosphorylase (EC 2.4.1.216); nigerose phosphorylase (EC 2.4.1.279); 3-O-alpha-glucopyranosyl-L-rhamnose phosphorylase (EC 2.4.1.282); 2-O-alpha-glucopyranosylglycerol: phosphate beta-glucosyltransferase (EC 2.4.1.-); alpha-g…	GH	Glycoside Hydrolases	0.48	7e-155
gene0706	Chromosome	RP01	GH13_31	GH13's subfamily	GH	Glycoside Hydrolases	0.62	1.6e-164
gene0777	Chromosome	RP01	GH26	beta-mannanase (EC 3.2.1.78); exo-beta-1,4-mannobiohydrolase (EC 3.2.1.100); beta-1,3-xylanase (EC 3.2.1.32); lichenase / endo-beta-1,3-1,4-glucanase (EC 3.2.1.73); mannobiose-producing exo-beta-mannanase (EC 3.2.1.-)	GH	Glycoside Hydrolases	0.88	5.1e-90
gene0790	Chromosome	RP01	GH1	beta-glucosidase (EC 3.2.1.21); beta-galactosidase (EC 3.2.1.23); beta-mannosidase (EC 3.2.1.25); beta-glucuronidase (EC 3.2.1.31); beta-xylosidase (EC 3.2.1.37); beta-D-fucosidase (EC 3.2.1.38); phlorizin hydrolase (EC 3.2.1.62); exo-beta-1,4-glucanase (EC 3.2.1.74); 6-phospho-beta-galactosidase (EC 3.2.1.85); 6-phospho-beta-glucosidase (EC 3.2.1.86); strictosidine beta-glucosidase (EC 3.2.1.105…	GH	Glycoside Hydrolases	0.9	9.7e-32
gene0840	Chromosome	RP01	GH18	chitinase (EC 3.2.1.14); lysozyme (EC 3.2.1.17); endo-beta-N-acetylglucosaminidase (EC 3.2.1.96); peptidoglycan hydrolase with endo-beta-N-acetylglucosaminidase specificity (EC 3.2.1.-); Nod factor hydrolase (EC 3.2.1.-); xylanase inhibitor; concanavalin B; narbonin	GH	Glycoside Hydrolases	0.88	5.5e-44
gene0852	Chromosome	RP01	GH13_29	GH13's subfamily	GH	Glycoside Hydrolases	0.61	5e-189
gene0865	Chromosome	RP01	GH109	alpha-N-acetylgalactosaminidase (EC 3.2.1.49)	GH	Glycoside Hydrolases	0.35	2.6e-23
gene0911	Chromosome	RP01	GH4	maltose-6-phosphate glucosidase (EC 3.2.1.122); alpha-glucosidase (EC 3.2.1.20); alpha-galactosidase (EC 3.2.1.22); 6-phospho-beta-glucosidase (EC 3.2.1.86); alpha-glucuronidase (EC 3.2.1.139); alpha-galacturonase (EC 3.2.1.67); palatinase (EC 3.2.1.-)	GH	Glycoside Hydrolases	0.4	2e-70
gene0919	Chromosome	RP01	GH43_10	GH43's subfamily	GH	Glycoside Hydrolases	0.5	3.6e-105
gene0920	Chromosome	RP01	GH43_12	GH43's subfamily	GH	Glycoside Hydrolases	0.55	8.6e-99
gene1211	Chromosome	RP01	GH4	maltose-6-phosphate glucosidase (EC 3.2.1.122); alpha-glucosidase (EC 3.2.1.20); alpha-galactosidase (EC 3.2.1.22); 6-phospho-beta-glucosidase (EC 3.2.1.86); alpha-glucuronidase (EC 3.2.1.139); alpha-galacturonase (EC 3.2.1.67); palatinase (EC 3.2.1.-)	GH	Glycoside Hydrolases	0.41	3.7e-67
gene1250	Chromosome	RP01	GH109	alpha-N-acetylgalactosaminidase (EC 3.2.1.49)	GH	Glycoside Hydrolases	0.34	2.1e-13
gene1315	Chromosome	RP01	GH8	chitosanase (EC 3.2.1.132); cellulase (EC 3.2.1.4); licheninase (EC 3.2.1.73); endo-1,4-beta-xylanase (EC 3.2.1.8); reducing-end-xylose releasing exo-oligoxylanase (EC 3.2.1.156)	GH	Glycoside Hydrolases	0.79	1.7e-75
gene1327	Chromosome	RP01	GH23	lysozyme type G (EC 3.2.1.17); peptidoglycan lyase (EC 4.2.2.n1) also known in the literature as peptidoglycan lytic transglycosylase; chitinase (EC 3.2.1.14)	GH	Glycoside Hydrolases	0.48	5.7e-34
gene1372	Chromosome	RP01	GH43_5	GH43's subfamily	GH	Glycoside Hydrolases	0.88	4.1e-117
gene1450	Chromosome	RP01	GH105	unsaturated rhamnogalacturonyl hydrolase (EC 3.2.1.172); d-4,5-unsaturated beta-glucuronyl hydrolase (EC 3.2.1.-)	GH	Glycoside Hydrolases	0.91	3.1e-91
gene1460	Chromosome	RP01	GH42	beta-galactosidase (EC 3.2.1.23); alpha-L-arabinopyranosidase (EC 3.2.1.-)	GH	Glycoside Hydrolases	0.54	1.2e-121
gene1846	Chromosome	RP01	GH9	endoglucanase (EC 3.2.1.4); endo-beta-1,3(4)-glucanase / lichenase-laminarinase (EC 3.2.1.6); beta-glucosidase (EC 3.2.1.21); lichenase / endo-beta-1,3-1,4-glucanase (EC 3.2.1.73); exo-beta-1,4-glucanase / cellodextrinase (EC 3.2.1.74); cellobiohydrolase (EC 3.2.1.91); xyloglucan-specific endo-beta-1,4-glucanase / endo-xyloglucanase (EC 3.2.1.151); exo-beta-glucosaminidase (EC 3.2.1.165)	GH	Glycoside Hydrolases	0.67	1.4e-152
gene1847	Chromosome	RP01	GH48	reducing end-acting cellobiohydrolase (EC 3.2.1.176); endo-beta-1,4-glucanase (EC 3.2.1.4); chitinase (EC 3.2.1.14)	GH	Glycoside Hydrolases	0.65	2.8e-270
gene1848	Chromosome	RP01	GH5_4	GH5's subfamily	GH	Glycoside Hydrolases	0.47	1.4e-85
gene1849	Chromosome	RP01	GH5_7	GH5's subfamily	GH	Glycoside Hydrolases	0.8	2.2e-112
gene1918	Chromosome	RP01	GH18	chitinase (EC 3.2.1.14); lysozyme (EC 3.2.1.17); endo-beta-N-acetylglucosaminidase (EC 3.2.1.96); peptidoglycan hydrolase with endo-beta-N-acetylglucosaminidase specificity (EC 3.2.1.-); Nod factor hydrolase (EC 3.2.1.-); xylanase inhibitor; concanavalin B; narbonin	GH	Glycoside Hydrolases	0.53	1.9e-45
gene2080	Chromosome	RP01	GH5_2	GH5's subfamily	GH	Glycoside Hydrolases	0.46	1.1e-99
gene2115	Chromosome	RP01	GH31	alpha-glucosidase (EC 3.2.1.20); alpha-galactosidase (EC 3.2.1.22); alpha-mannosidase (EC 3.2.1.24); alpha-1,3-glucosidase (EC 3.2.1.84); sucrase-isomaltase (EC 3.2.1.48) (EC 3.2.1.10); alpha-xylosidase (EC 3.2.1.177); alpha-glucan lyase (EC 4.2.2.13); isomaltosyltransferase (EC 2.4.1.-); oligosaccharide alpha-1,4-glucosyltransferase (EC 2.4.1.161); sulfoquinovosidase (EC 3.2.1.-)	GH	Glycoside Hydrolases	0.56	1.6e-133
gene2215	Chromosome	RP01	GH23	lysozyme type G (EC 3.2.1.17); peptidoglycan lyase (EC 4.2.2.n1) also known in the literature as peptidoglycan lytic transglycosylase; chitinase (EC 3.2.1.14)	GH	Glycoside Hydrolases	0.62	8.8e-13
gene2586	Chromosome	RP01	GH1	beta-glucosidase (EC 3.2.1.21); beta-galactosidase (EC 3.2.1.23); beta-mannosidase (EC 3.2.1.25); beta-glucuronidase (EC 3.2.1.31); beta-xylosidase (EC 3.2.1.37); beta-D-fucosidase (EC 3.2.1.38); phlorizin hydrolase (EC 3.2.1.62); exo-beta-1,4-glucanase (EC 3.2.1.74); 6-phospho-beta-galactosidase (EC 3.2.1.85); 6-phospho-beta-glucosidase (EC 3.2.1.86); strictosidine beta-glucosidase (EC 3.2.1.105…	GH	Glycoside Hydrolases	0.97	2e-158
gene2871	Chromosome	RP01	GH43_11	GH43's subfamily	GH	Glycoside Hydrolases	0.56	6.8e-153
gene2875	Chromosome	RP01	GH32	invertase (EC 3.2.1.26); endo-inulinase (EC 3.2.1.7); beta-2,6-fructan 6-levanbiohydrolase (EC 3.2.1.64); endo-levanase (EC 3.2.1.65); exo-inulinase (EC 3.2.1.80); fructan beta-(2,1)-fructosidase/1-exohydrolase (EC 3.2.1.153); fructan beta-(2,6)-fructosidase/6-exohydrolase (EC 3.2.1.154); sucrose:sucrose 1-fructosyltransferase (EC 2.4.1.99); fructan:fructan 1-fructosyltransferase (EC 2.4.1.100); …	GH	Glycoside Hydrolases	0.46	5.6e-111
gene3060	Chromosome	RP01	GH51	endoglucanase (EC 3.2.1.4); endo-beta-1,4-xylanase (EC 3.2.1.8); beta-xylosidase (EC 3.2.1.37); alpha-L-arabinofuranosidase (EC 3.2.1.55)	GH	Glycoside Hydrolases	0.99	4.4e-151
gene3068	Chromosome	RP01	GH43_5	GH43's subfamily	GH	Glycoside Hydrolases	0.87	7.4e-119
gene3101	Chromosome	RP01	GH16	xyloglucan:xyloglucosyltransferase (EC 2.4.1.207); keratan-sulfate endo-1,4-beta-galactosidase (EC 3.2.1.103); endo-1,3-beta-glucanase (EC 3.2.1.39); endo-1,3(4)-beta-glucanase (EC 3.2.1.6); licheninase (EC 3.2.1.73); beta-agarase (EC 3.2.1.81); kappa;-carrageenase (EC 3.2.1.83); xyloglucanase (EC 3.2.1.151); endo-beta-1,3-galactanase (EC 3.2.1.181); beta-porphyranase (EC 3.2.1.178); hyaluronidas…	GH	Glycoside Hydrolases	0.84	5.6e-32
gene3174	Chromosome	RP01	GH13_14	GH13's subfamily	GH	Glycoside Hydrolases	0.43	8.6e-107
gene3198	Chromosome	RP01	GH105	unsaturated rhamnogalacturonyl hydrolase (EC 3.2.1.172); d-4,5-unsaturated beta-glucuronyl hydrolase (EC 3.2.1.-)	GH	Glycoside Hydrolases	0.9	2.3e-110
gene3264	Chromosome	RP01	GH13_9	GH13's subfamily	GH	Glycoside Hydrolases	0.46	4.5e-142
gene3337	Chromosome	RP01	GH13_31	GH13's subfamily	GH	Glycoside Hydrolases	0.61	1.8e-159
gene3340	Chromosome	RP01	GH12	endoglucanase (EC 3.2.1.4); xyloglucan hydrolase (EC 3.2.1.151); beta-1,3-1,4-glucanase (EC 3.2.1.73); xyloglucan endotransglycosylase (EC 2.4.1.207)	GH	Glycoside Hydrolases	0.59	3e-42
gene3533	Chromosome	RP01	GH33	sialidase or neuraminidase (EC 3.2.1.18); trans-sialidase (EC 2.4.1.-); 2-keto-3-deoxynononic acid hydrolase (EC 3.2.1.-); anhydrosialidase (EC 4.2.2.15); 3-deoxy-D-manno-octulosonic-acid hydrolase (EC 3.2.1.-)	GH	Glycoside Hydrolases	0.85	1.3e-31
gene3545	Chromosome	RP01	GH28	polygalacturonase (EC 3.2.1.15); alpha-L-rhamnosidase (EC 3.2.1.40); exo-polygalacturonase (EC 3.2.1.67); exo-polygalacturonosidase (EC 3.2.1.82); rhamnogalacturonase (EC 3.2.1.171); rhamnogalacturonan alpha-1,2-galacturonohydrolase (EC 3.2.1.173); endo-xylogalacturonan hydrolase (EC 3.2.1.-)	GH	Glycoside Hydrolases	0.82	3.8e-82
gene3576	Chromosome	RP01	GH31	alpha-glucosidase (EC 3.2.1.20); alpha-galactosidase (EC 3.2.1.22); alpha-mannosidase (EC 3.2.1.24); alpha-1,3-glucosidase (EC 3.2.1.84); sucrase-isomaltase (EC 3.2.1.48) (EC 3.2.1.10); alpha-xylosidase (EC 3.2.1.177); alpha-glucan lyase (EC 4.2.2.13); isomaltosyltransferase (EC 2.4.1.-); oligosaccharide alpha-1,4-glucosyltransferase (EC 2.4.1.161); sulfoquinovosidase (EC 3.2.1.-)	GH	Glycoside Hydrolases	0.56	4.6e-138
gene3616	Chromosome	RP01	GH30_8	GH30's subfamily	GH	Glycoside Hydrolases	0.82	6.6e-156
gene3617	Chromosome	RP01	GH43_16	GH43's subfamily	GH	Glycoside Hydrolases	0.63	1.2e-146
gene3689	Chromosome	RP01	GH68	levansucrase (EC 2.4.1.10); beta-fructofuranosidase (EC 3.2.1.26); inulosucrase (EC 2.4.1.9).	GH	Glycoside Hydrolases	0.91	2.5e-142
gene3690	Chromosome	RP01	GH32	invertase (EC 3.2.1.26); endo-inulinase (EC 3.2.1.7); beta-2,6-fructan 6-levanbiohydrolase (EC 3.2.1.64); endo-levanase (EC 3.2.1.65); exo-inulinase (EC 3.2.1.80); fructan beta-(2,1)-fructosidase/1-exohydrolase (EC 3.2.1.153); fructan beta-(2,6)-fructosidase/6-exohydrolase (EC 3.2.1.154); sucrose:sucrose 1-fructosyltransferase (EC 2.4.1.99); fructan:fructan 1-fructosyltransferase (EC 2.4.1.100); …	GH	Glycoside Hydrolases	0.61	5.6e-79
gene4004	Chromosome	RP01	GH32	invertase (EC 3.2.1.26); endo-inulinase (EC 3.2.1.7); beta-2,6-fructan 6-levanbiohydrolase (EC 3.2.1.64); endo-levanase (EC 3.2.1.65); exo-inulinase (EC 3.2.1.80); fructan beta-(2,1)-fructosidase/1-exohydrolase (EC 3.2.1.153); fructan beta-(2,6)-fructosidase/6-exohydrolase (EC 3.2.1.154); sucrose:sucrose 1-fructosyltransferase (EC 2.4.1.99); fructan:fructan 1-fructosyltransferase (EC 2.4.1.100); …	GH	Glycoside Hydrolases	0.64	4.1e-107
gene4073	Chromosome	RP01	GH4	maltose-6-phosphate glucosidase (EC 3.2.1.122); alpha-glucosidase (EC 3.2.1.20); alpha-galactosidase (EC 3.2.1.22); 6-phospho-beta-glucosidase (EC 3.2.1.86); alpha-glucuronidase (EC 3.2.1.139); alpha-galacturonase (EC 3.2.1.67); palatinase (EC 3.2.1.-)	GH	Glycoside Hydrolases	0.41	3.4e-79
gene4137	Chromosome	RP01	GH1	beta-glucosidase (EC 3.2.1.21); beta-galactosidase (EC 3.2.1.23); beta-mannosidase (EC 3.2.1.25); beta-glucuronidase (EC 3.2.1.31); beta-xylosidase (EC 3.2.1.37); beta-D-fucosidase (EC 3.2.1.38); phlorizin hydrolase (EC 3.2.1.62); exo-beta-1,4-glucanase (EC 3.2.1.74); 6-phospho-beta-galactosidase (EC 3.2.1.85); 6-phospho-beta-glucosidase (EC 3.2.1.86); strictosidine beta-glucosidase (EC 3.2.1.105…	GH	Glycoside Hydrolases	0.97	8.7e-120
gene4143	Chromosome	RP01	GH32	invertase (EC 3.2.1.26); endo-inulinase (EC 3.2.1.7); beta-2,6-fructan 6-levanbiohydrolase (EC 3.2.1.64); endo-levanase (EC 3.2.1.65); exo-inulinase (EC 3.2.1.80); fructan beta-(2,1)-fructosidase/1-exohydrolase (EC 3.2.1.153); fructan beta-(2,6)-fructosidase/6-exohydrolase (EC 3.2.1.154); sucrose:sucrose 1-fructosyltransferase (EC 2.4.1.99); fructan:fructan 1-fructosyltransferase (EC 2.4.1.100); …	GH	Glycoside Hydrolases	0.62	1.1e-116
gene4163	Chromosome	RP01	GH1	beta-glucosidase (EC 3.2.1.21); beta-galactosidase (EC 3.2.1.23); beta-mannosidase (EC 3.2.1.25); beta-glucuronidase (EC 3.2.1.31); beta-xylosidase (EC 3.2.1.37); beta-D-fucosidase (EC 3.2.1.38); phlorizin hydrolase (EC 3.2.1.62); exo-beta-1,4-glucanase (EC 3.2.1.74); 6-phospho-beta-galactosidase (EC 3.2.1.85); 6-phospho-beta-glucosidase (EC 3.2.1.86); strictosidine beta-glucosidase (EC 3.2.1.105…	GH	Glycoside Hydrolases	0.98	5.8e-161
gene4179	Chromosome	RP01	GH1	beta-glucosidase (EC 3.2.1.21); beta-galactosidase (EC 3.2.1.23); beta-mannosidase (EC 3.2.1.25); beta-glucuronidase (EC 3.2.1.31); beta-xylosidase (EC 3.2.1.37); beta-D-fucosidase (EC 3.2.1.38); phlorizin hydrolase (EC 3.2.1.62); exo-beta-1,4-glucanase (EC 3.2.1.74); 6-phospho-beta-galactosidase (EC 3.2.1.85); 6-phospho-beta-glucosidase (EC 3.2.1.86); strictosidine beta-glucosidase (EC 3.2.1.105…	GH	Glycoside Hydrolases	0.99	1.5e-155
gene4183	Chromosome	RP01	GH43_4	GH43's subfamily	GH	Glycoside Hydrolases	0.68	2.4e-133
gene4192	Chromosome	RP01	GH126	alpha-amylase (EC 3.2.1.-)	GH	Glycoside Hydrolases	0.88	2.1e-101
gene4205	Chromosome	RP01	GH109	alpha-N-acetylgalactosaminidase (EC 3.2.1.49)	GH	Glycoside Hydrolases	0.34	2.9e-15
gene4236	Chromosome	RP01	GH53	endo-beta-1,4-galactanase (EC 3.2.1.89).	GH	Glycoside Hydrolases	0.86	5.5e-138
gene4237	Chromosome	RP01	GH42	beta-galactosidase (EC 3.2.1.23); alpha-L-arabinopyranosidase (EC 3.2.1.-)	GH	Glycoside Hydrolases	0.56	2.5e-156
gene0209	Chromosome	RP01	CE4	acetyl xylan esterase (EC 3.1.1.72); chitin deacetylase (EC 3.5.1.41); chitooligosaccharide deacetylase (EC 3.5.1.-); peptidoglycan GlcNAc deacetylase (EC 3.5.1.-); peptidoglycan N-acetylmuramic acid deacetylase (EC 3.5.1.-).	CE	Carbohydrate Esterases	0.51	5.9e-24
gene0410	Chromosome	RP01	CE7	acetyl xylan esterase (EC 3.1.1.72); cephalosporin-C deacetylase (EC 3.1.1.41).	CE	Carbohydrate Esterases	0.97	1.9e-123
gene0435	Chromosome	RP01	CE1	acetyl xylan esterase (EC 3.1.1.72); cinnamoyl esterase (EC 3.1.1.-); feruloyl esterase (EC 3.1.1.73); carboxylesterase (EC 3.1.1.1); S-formylglutathione hydrolase (EC 3.1.2.12); diacylglycerol O-acyltransferase (EC 2.3.1.20); trehalose 6-O-mycolyltransferase (EC 2.3.1.122)	CE	Carbohydrate Esterases	0.86	5.7e-30
gene0570	Chromosome	RP01	CE7	acetyl xylan esterase (EC 3.1.1.72); cephalosporin-C deacetylase (EC 3.1.1.41).	CE	Carbohydrate Esterases	0.7	2.8e-07
gene0884	Chromosome	RP01	CE4	acetyl xylan esterase (EC 3.1.1.72); chitin deacetylase (EC 3.5.1.41); chitooligosaccharide deacetylase (EC 3.5.1.-); peptidoglycan GlcNAc deacetylase (EC 3.5.1.-); peptidoglycan N-acetylmuramic acid deacetylase (EC 3.5.1.-).	CE	Carbohydrate Esterases	0.48	1.4e-35
gene1032	Chromosome	RP01	CE10	arylesterase (EC 3.1.1.-); carboxyl esterase (EC 3.1.1.3); acetylcholinesterase (EC 3.1.1.7); cholinesterase (EC 3.1.1.8); sterol esterase (EC 3.1.1.13); brefeldin A esterase (EC 3.1.1.-).	CE	Carbohydrate Esterases	0.87	1.2e-16
gene1104	Chromosome	RP01	CE4	acetyl xylan esterase (EC 3.1.1.72); chitin deacetylase (EC 3.5.1.41); chitooligosaccharide deacetylase (EC 3.5.1.-); peptidoglycan GlcNAc deacetylase (EC 3.5.1.-); peptidoglycan N-acetylmuramic acid deacetylase (EC 3.5.1.-).	CE	Carbohydrate Esterases	0.42	3.4e-25
gene1277	Chromosome	RP01	CE1	acetyl xylan esterase (EC 3.1.1.72); cinnamoyl esterase (EC 3.1.1.-); feruloyl esterase (EC 3.1.1.73); carboxylesterase (EC 3.1.1.1); S-formylglutathione hydrolase (EC 3.1.2.12); diacylglycerol O-acyltransferase (EC 2.3.1.20); trehalose 6-O-mycolyltransferase (EC 2.3.1.122)	CE	Carbohydrate Esterases	0.76	9.8e-13
gene1361	Chromosome	RP01	CE1	acetyl xylan esterase (EC 3.1.1.72); cinnamoyl esterase (EC 3.1.1.-); feruloyl esterase (EC 3.1.1.73); carboxylesterase (EC 3.1.1.1); S-formylglutathione hydrolase (EC 3.1.2.12); diacylglycerol O-acyltransferase (EC 2.3.1.20); trehalose 6-O-mycolyltransferase (EC 2.3.1.122)	CE	Carbohydrate Esterases	0.93	3.9e-29
gene1374	Chromosome	RP01	CE1	acetyl xylan esterase (EC 3.1.1.72); cinnamoyl esterase (EC 3.1.1.-); feruloyl esterase (EC 3.1.1.73); carboxylesterase (EC 3.1.1.1); S-formylglutathione hydrolase (EC 3.1.2.12); diacylglycerol O-acyltransferase (EC 2.3.1.20); trehalose 6-O-mycolyltransferase (EC 2.3.1.122)	CE	Carbohydrate Esterases	0.38	9.7e-08
gene1452	Chromosome	RP01	CE12	pectin acetylesterase (EC 3.1.1.-); rhamnogalacturonan acetylesterase (EC 3.1.1.-); acetyl xylan esterase (EC 3.1.1.72)	CE	Carbohydrate Esterases	0.86	5.3e-77
gene1456	Chromosome	RP01	CE12	pectin acetylesterase (EC 3.1.1.-); rhamnogalacturonan acetylesterase (EC 3.1.1.-); acetyl xylan esterase (EC 3.1.1.72)	CE	Carbohydrate Esterases	0.38	3e-74
gene1459	Chromosome	RP01	CE12	pectin acetylesterase (EC 3.1.1.-); rhamnogalacturonan acetylesterase (EC 3.1.1.-); acetyl xylan esterase (EC 3.1.1.72)	CE	Carbohydrate Esterases	0.91	6.2e-70
gene1861	Chromosome	RP01	CE4	acetyl xylan esterase (EC 3.1.1.72); chitin deacetylase (EC 3.5.1.41); chitooligosaccharide deacetylase (EC 3.5.1.-); peptidoglycan GlcNAc deacetylase (EC 3.5.1.-); peptidoglycan N-acetylmuramic acid deacetylase (EC 3.5.1.-).	CE	Carbohydrate Esterases	0.38	4e-31
gene2251	Chromosome	RP01	CE10	arylesterase (EC 3.1.1.-); carboxyl esterase (EC 3.1.1.3); acetylcholinesterase (EC 3.1.1.7); cholinesterase (EC 3.1.1.8); sterol esterase (EC 3.1.1.13); brefeldin A esterase (EC 3.1.1.-).	CE	Carbohydrate Esterases	0.82	4e-08
gene2286	Chromosome	RP01	CE14	N-acetyl-1-D-myo-inosityl-2-amino-2-deoxy-alpha-D-glucopyranoside deacetylase (EC 3.5.1.89); diacetylchitobiose deacetylase (EC 3.5.1.-); mycothiol S-conjugate amidase (EC 3.5.1.-)	CE	Carbohydrate Esterases	0.54	7.2e-31
gene2296	Chromosome	RP01	CE1	acetyl xylan esterase (EC 3.1.1.72); cinnamoyl esterase (EC 3.1.1.-); feruloyl esterase (EC 3.1.1.73); carboxylesterase (EC 3.1.1.1); S-formylglutathione hydrolase (EC 3.1.2.12); diacylglycerol O-acyltransferase (EC 2.3.1.20); trehalose 6-O-mycolyltransferase (EC 2.3.1.122)	CE	Carbohydrate Esterases	0.86	1.5e-08
gene2331	Chromosome	RP01	CE3	acetyl xylan esterase (EC 3.1.1.72).	CE	Carbohydrate Esterases	0.82	9.4e-15
gene2407	Chromosome	RP01	CE14	N-acetyl-1-D-myo-inosityl-2-amino-2-deoxy-alpha-D-glucopyranoside deacetylase (EC 3.5.1.89); diacetylchitobiose deacetylase (EC 3.5.1.-); mycothiol S-conjugate amidase (EC 3.5.1.-)	CE	Carbohydrate Esterases	0.45	8e-26
gene2472	Chromosome	RP01	CE4	acetyl xylan esterase (EC 3.1.1.72); chitin deacetylase (EC 3.5.1.41); chitooligosaccharide deacetylase (EC 3.5.1.-); peptidoglycan GlcNAc deacetylase (EC 3.5.1.-); peptidoglycan N-acetylmuramic acid deacetylase (EC 3.5.1.-).	CE	Carbohydrate Esterases	0.38	1.5e-25
gene2790	Chromosome	RP01	CE12	pectin acetylesterase (EC 3.1.1.-); rhamnogalacturonan acetylesterase (EC 3.1.1.-); acetyl xylan esterase (EC 3.1.1.72)	CE	Carbohydrate Esterases	0.74	1.3e-18
gene2869	Chromosome	RP01	CE10	arylesterase (EC 3.1.1.-); carboxyl esterase (EC 3.1.1.3); acetylcholinesterase (EC 3.1.1.7); cholinesterase (EC 3.1.1.8); sterol esterase (EC 3.1.1.13); brefeldin A esterase (EC 3.1.1.-).	CE	Carbohydrate Esterases	0.71	7.1e-42
gene3166	Chromosome	RP01	CE3	acetyl xylan esterase (EC 3.1.1.72).	CE	Carbohydrate Esterases	0.58	5.9e-06
gene3204	Chromosome	RP01	CE15	4-O-methyl-glucuronoyl methylesterase (EC 3.1.1.-)	CE	Carbohydrate Esterases	0.68	1.1e-12
gene3223	Chromosome	RP01	CE1	acetyl xylan esterase (EC 3.1.1.72); cinnamoyl esterase (EC 3.1.1.-); feruloyl esterase (EC 3.1.1.73); carboxylesterase (EC 3.1.1.1); S-formylglutathione hydrolase (EC 3.1.2.12); diacylglycerol O-acyltransferase (EC 2.3.1.20); trehalose 6-O-mycolyltransferase (EC 2.3.1.122)	CE	Carbohydrate Esterases	0.88	3.3e-06
gene3232	Chromosome	RP01	CE1	acetyl xylan esterase (EC 3.1.1.72); cinnamoyl esterase (EC 3.1.1.-); feruloyl esterase (EC 3.1.1.73); carboxylesterase (EC 3.1.1.1); S-formylglutathione hydrolase (EC 3.1.2.12); diacylglycerol O-acyltransferase (EC 2.3.1.20); trehalose 6-O-mycolyltransferase (EC 2.3.1.122)	CE	Carbohydrate Esterases	0.67	7.1e-07
gene3255	Chromosome	RP01	CE1	acetyl xylan esterase (EC 3.1.1.72); cinnamoyl esterase (EC 3.1.1.-); feruloyl esterase (EC 3.1.1.73); carboxylesterase (EC 3.1.1.1); S-formylglutathione hydrolase (EC 3.1.2.12); diacylglycerol O-acyltransferase (EC 2.3.1.20); trehalose 6-O-mycolyltransferase (EC 2.3.1.122)	CE	Carbohydrate Esterases	0.53	9.6e-08
gene3356	Chromosome	RP01	CE1	acetyl xylan esterase (EC 3.1.1.72); cinnamoyl esterase (EC 3.1.1.-); feruloyl esterase (EC 3.1.1.73); carboxylesterase (EC 3.1.1.1); S-formylglutathione hydrolase (EC 3.1.2.12); diacylglycerol O-acyltransferase (EC 2.3.1.20); trehalose 6-O-mycolyltransferase (EC 2.3.1.122)	CE	Carbohydrate Esterases	0.47	1.9e-08
gene3397	Chromosome	RP01	CE10	arylesterase (EC 3.1.1.-); carboxyl esterase (EC 3.1.1.3); acetylcholinesterase (EC 3.1.1.7); cholinesterase (EC 3.1.1.8); sterol esterase (EC 3.1.1.13); brefeldin A esterase (EC 3.1.1.-).	CE	Carbohydrate Esterases	0.75	6.8e-37
gene3439	Chromosome	RP01	CE10	arylesterase (EC 3.1.1.-); carboxyl esterase (EC 3.1.1.3); acetylcholinesterase (EC 3.1.1.7); cholinesterase (EC 3.1.1.8); sterol esterase (EC 3.1.1.13); brefeldin A esterase (EC 3.1.1.-).	CE	Carbohydrate Esterases	0.42	1.2e-27
gene3528	Chromosome	RP01	CE8	pectin methylesterase (EC 3.1.1.11).	CE	Carbohydrate Esterases	0.95	1.6e-97
gene3615	Chromosome	RP01	CE1	acetyl xylan esterase (EC 3.1.1.72); cinnamoyl esterase (EC 3.1.1.-); feruloyl esterase (EC 3.1.1.73); carboxylesterase (EC 3.1.1.1); S-formylglutathione hydrolase (EC 3.1.2.12); diacylglycerol O-acyltransferase (EC 2.3.1.20); trehalose 6-O-mycolyltransferase (EC 2.3.1.122)	CE	Carbohydrate Esterases	0.36	1.8e-14
gene3896	Chromosome	RP01	CE1	acetyl xylan esterase (EC 3.1.1.72); cinnamoyl esterase (EC 3.1.1.-); feruloyl esterase (EC 3.1.1.73); carboxylesterase (EC 3.1.1.1); S-formylglutathione hydrolase (EC 3.1.2.12); diacylglycerol O-acyltransferase (EC 2.3.1.20); trehalose 6-O-mycolyltransferase (EC 2.3.1.122)	CE	Carbohydrate Esterases	0.83	4.1e-20
gene4087	Chromosome	RP01	CE12	pectin acetylesterase (EC 3.1.1.-); rhamnogalacturonan acetylesterase (EC 3.1.1.-); acetyl xylan esterase (EC 3.1.1.72)	CE	Carbohydrate Esterases	0.94	4.5e-81
gene4119	Chromosome	RP01	CE4	acetyl xylan esterase (EC 3.1.1.72); chitin deacetylase (EC 3.5.1.41); chitooligosaccharide deacetylase (EC 3.5.1.-); peptidoglycan GlcNAc deacetylase (EC 3.5.1.-); peptidoglycan N-acetylmuramic acid deacetylase (EC 3.5.1.-).	CE	Carbohydrate Esterases	0.46	1.6e-33
gene4298	Chromosome	RP01	CE9	N-acetylglucosamine 6-phosphate deacetylase (EC 3.5.1.25); N-acetylglucosamine 6-phosphate deacetylase (EC 3.5.1.80)	CE	Carbohydrate Esterases	0.91	8e-137
gene0362	Chromosome	RP01	AA4	vanillyl-alcohol oxidase (EC 1.1.3.38)	AA	Auxiliary Activities	0.45	8.1e-36
gene0547	Chromosome	RP01	AA10	AA10 (formerly CBM33) proteins are copper-dependent lytic polysaccharide monooxygenases (LPMOs); some proteins have been shown to act on chitin, others on cellulose;	AA	Auxiliary Activities	0.83	1.3e-54
gene0721	Chromosome	RP01	AA1	Laccase / p-diphenol:oxygen oxidoreductase / ferroxidase (EC 1.10.3.2); ; ferroxidase (EC 1.10.3.-); Laccase-like multicopper oxidase (EC 1.10.3.-)	AA	Auxiliary Activities	0.54	1.5e-28
gene1021	Chromosome	RP01	AA6	1,4-benzoquinone reductase (EC. 1.6.5.6)	AA	Auxiliary Activities	0.96	2.1e-51
gene1061	Chromosome	RP01	AA6	1,4-benzoquinone reductase (EC. 1.6.5.6)	AA	Auxiliary Activities	0.37	2.5e-06
gene2021	Chromosome	RP01	AA6	1,4-benzoquinone reductase (EC. 1.6.5.6)	AA	Auxiliary Activities	0.87	8.6e-58
gene0553	Chromosome	RP01	GT1	UDP-glucuronosyltransferase (EC 2.4.1.17); zeatin O-beta-xylosyltransferase (EC 2.4.2.40); 2-hydroxyacylsphingosine 1-beta-galactosyltransferase (EC 2.4.1.45); N-acylsphingosine galactosyltransferase (EC 2.4.1.47); flavonol 3-O-glucosyltransferase (EC 2.4.1.91); anthocyanidin 3-O-glucosyltransferase (EC 2.4.1.115); sinapate 1-glucosyltransferase (EC 2.4.1.120); indole-3-acetate beta-glucosyltrans…	GT	Glycosyl Transferases	0.62	2.2e-50
gene0863	Chromosome	RP01	GT2_Glycos_transf_2		GT		0.39	5e-23
gene0894	Chromosome	RP01	GT1	UDP-glucuronosyltransferase (EC 2.4.1.17); zeatin O-beta-xylosyltransferase (EC 2.4.2.40); 2-hydroxyacylsphingosine 1-beta-galactosyltransferase (EC 2.4.1.45); N-acylsphingosine galactosyltransferase (EC 2.4.1.47); flavonol 3-O-glucosyltransferase (EC 2.4.1.91); anthocyanidin 3-O-glucosyltransferase (EC 2.4.1.115); sinapate 1-glucosyltransferase (EC 2.4.1.120); indole-3-acetate beta-glucosyltrans…	GT	Glycosyl Transferases	0.53	2e-40
gene0939	Chromosome	RP01	GT2_Glycos_transf_2		GT		0.5	4.8e-39
gene1133	Chromosome	RP01	GT41	UDP-GlcNAc: peptide beta-N-acetylglucosaminyltransferase (EC 2.4.1.255); UDP-Glc: peptide N-beta-glucosyltransferase (EC 2.4.1.-)	GT	Glycosyl Transferases	0.45	6e-06
gene1205	Chromosome	RP01	GT41	UDP-GlcNAc: peptide beta-N-acetylglucosaminyltransferase (EC 2.4.1.255); UDP-Glc: peptide N-beta-glucosyltransferase (EC 2.4.1.-)	GT	Glycosyl Transferases	0.62	5.4e-06
gene1709	Chromosome	RP01	GT28	1,2-diacylglycerol 3-beta-galactosyltransferase (EC 2.4.1.46); 1,2-diacylglycerol 3-beta-glucosyltransferase (EC 2.4.1.157); UDP-GlcNAc: Und-PP-MurAc-pentapeptide beta-N-acetylglucosaminyltransferase (EC 2.4.1.227); digalactosyldiacylglycerol synthase (EC 2.4.1.241)	GT	Glycosyl Transferases	0.45	9.8e-52
gene1898	Chromosome	RP01	GT41	UDP-GlcNAc: peptide beta-N-acetylglucosaminyltransferase (EC 2.4.1.255); UDP-Glc: peptide N-beta-glucosyltransferase (EC 2.4.1.-)	GT	Glycosyl Transferases	0.41	1.1e-08
gene1914	Chromosome	RP01	GT1	UDP-glucuronosyltransferase (EC 2.4.1.17); zeatin O-beta-xylosyltransferase (EC 2.4.2.40); 2-hydroxyacylsphingosine 1-beta-galactosyltransferase (EC 2.4.1.45); N-acylsphingosine galactosyltransferase (EC 2.4.1.47); flavonol 3-O-glucosyltransferase (EC 2.4.1.91); anthocyanidin 3-O-glucosyltransferase (EC 2.4.1.115); sinapate 1-glucosyltransferase (EC 2.4.1.120); indole-3-acetate beta-glucosyltrans…	GT	Glycosyl Transferases	0.32	4e-50
gene2132	Chromosome	RP01	GT4	sucrose synthase (EC 2.4.1.13); sucrose-phosphate synthase (EC 2.4.1.14); alpha-glucosyltransferase (EC 2.4.1.52); lipopolysaccharide N-acetylglucosaminyltransferase (EC 2.4.1.56); phosphatidylinositol alpha-mannosyltransferase (EC 2.4.1.57); GDP-Man: Man1GlcNAc2-PP-dolichol alpha-1,3-mannosyltransferase (EC 2.4.1.132); GDP-Man: Man3GlcNAc2-PP-dolichol/Man4GlcNAc2-PP-dolichol alpha-1,2-mannosyltr…	GT	Glycosyl Transferases	0.31	1.7e-41
gene2169	Chromosome	RP01	GT2_Glycos_transf_2		GT		0.51	8.7e-28
gene2219	Chromosome	RP01	GT4	sucrose synthase (EC 2.4.1.13); sucrose-phosphate synthase (EC 2.4.1.14); alpha-glucosyltransferase (EC 2.4.1.52); lipopolysaccharide N-acetylglucosaminyltransferase (EC 2.4.1.56); phosphatidylinositol alpha-mannosyltransferase (EC 2.4.1.57); GDP-Man: Man1GlcNAc2-PP-dolichol alpha-1,3-mannosyltransferase (EC 2.4.1.132); GDP-Man: Man3GlcNAc2-PP-dolichol/Man4GlcNAc2-PP-dolichol alpha-1,2-mannosyltr…	GT	Glycosyl Transferases	0.37	3.3e-34
gene2351	Chromosome	RP01	GT28	1,2-diacylglycerol 3-beta-galactosyltransferase (EC 2.4.1.46); 1,2-diacylglycerol 3-beta-glucosyltransferase (EC 2.4.1.157); UDP-GlcNAc: Und-PP-MurAc-pentapeptide beta-N-acetylglucosaminyltransferase (EC 2.4.1.227); digalactosyldiacylglycerol synthase (EC 2.4.1.241)	GT	Glycosyl Transferases	0.39	6.3e-35
gene2406	Chromosome	RP01	GT4	sucrose synthase (EC 2.4.1.13); sucrose-phosphate synthase (EC 2.4.1.14); alpha-glucosyltransferase (EC 2.4.1.52); lipopolysaccharide N-acetylglucosaminyltransferase (EC 2.4.1.56); phosphatidylinositol alpha-mannosyltransferase (EC 2.4.1.57); GDP-Man: Man1GlcNAc2-PP-dolichol alpha-1,3-mannosyltransferase (EC 2.4.1.132); GDP-Man: Man3GlcNAc2-PP-dolichol/Man4GlcNAc2-PP-dolichol alpha-1,2-mannosyltr…	GT	Glycosyl Transferases	0.38	1.4e-43
gene2419	Chromosome	RP01	GT41	UDP-GlcNAc: peptide beta-N-acetylglucosaminyltransferase (EC 2.4.1.255); UDP-Glc: peptide N-beta-glucosyltransferase (EC 2.4.1.-)	GT	Glycosyl Transferases	0.47	5.1e-18
gene2498	Chromosome	RP01	GT41	UDP-GlcNAc: peptide beta-N-acetylglucosaminyltransferase (EC 2.4.1.255); UDP-Glc: peptide N-beta-glucosyltransferase (EC 2.4.1.-)	GT	Glycosyl Transferases	0.4	3.2e-07
gene2690	Chromosome	RP01	GT4	sucrose synthase (EC 2.4.1.13); sucrose-phosphate synthase (EC 2.4.1.14); alpha-glucosyltransferase (EC 2.4.1.52); lipopolysaccharide N-acetylglucosaminyltransferase (EC 2.4.1.56); phosphatidylinositol alpha-mannosyltransferase (EC 2.4.1.57); GDP-Man: Man1GlcNAc2-PP-dolichol alpha-1,3-mannosyltransferase (EC 2.4.1.132); GDP-Man: Man3GlcNAc2-PP-dolichol/Man4GlcNAc2-PP-dolichol alpha-1,2-mannosyltr…	GT	Glycosyl Transferases	0.4	2.2e-34
gene2929	Chromosome	RP01	GT41	UDP-GlcNAc: peptide beta-N-acetylglucosaminyltransferase (EC 2.4.1.255); UDP-Glc: peptide N-beta-glucosyltransferase (EC 2.4.1.-)	GT	Glycosyl Transferases	0.31	1.4e-20
gene3226	Chromosome	RP01	GT4	sucrose synthase (EC 2.4.1.13); sucrose-phosphate synthase (EC 2.4.1.14); alpha-glucosyltransferase (EC 2.4.1.52); lipopolysaccharide N-acetylglucosaminyltransferase (EC 2.4.1.56); phosphatidylinositol alpha-mannosyltransferase (EC 2.4.1.57); GDP-Man: Man1GlcNAc2-PP-dolichol alpha-1,3-mannosyltransferase (EC 2.4.1.132); GDP-Man: Man3GlcNAc2-PP-dolichol/Man4GlcNAc2-PP-dolichol alpha-1,2-mannosyltr…	GT	Glycosyl Transferases	0.39	5.3e-38
gene3260	Chromosome	RP01	GT35	glycogen or starch phosphorylase (EC 2.4.1.1).	GT	Glycosyl Transferases	0.88	3.5e-266
gene3261	Chromosome	RP01	GT5	UDP-Glc: glycogen glucosyltransferase (EC 2.4.1.11); ADP-Glc: starch glucosyltransferase (EC 2.4.1.21); NDP-Glc: starch glucosyltransferase (EC 2.4.1.242); UDP-Glc: alpha-1,3-glucan synthase (EC 2.4.1.183) UDP-Glc: alpha-1,4-glucan synthase (EC 2.4.1.-)	GT	Glycosyl Transferases	0.96	7.5e-185
gene3324	Chromosome	RP01	GT28	1,2-diacylglycerol 3-beta-galactosyltransferase (EC 2.4.1.46); 1,2-diacylglycerol 3-beta-glucosyltransferase (EC 2.4.1.157); UDP-GlcNAc: Und-PP-MurAc-pentapeptide beta-N-acetylglucosaminyltransferase (EC 2.4.1.227); digalactosyldiacylglycerol synthase (EC 2.4.1.241)	GT	Glycosyl Transferases	0.38	2.6e-19
gene3667	Chromosome	RP01	GT2_Glycos_transf_2		GT		0.46	1.1e-41
gene3669	Chromosome	RP01	GT2_Glycos_transf_2		GT		0.38	8.1e-38
gene3671	Chromosome	RP01	GT5	UDP-Glc: glycogen glucosyltransferase (EC 2.4.1.11); ADP-Glc: starch glucosyltransferase (EC 2.4.1.21); NDP-Glc: starch glucosyltransferase (EC 2.4.1.242); UDP-Glc: alpha-1,3-glucan synthase (EC 2.4.1.183) UDP-Glc: alpha-1,4-glucan synthase (EC 2.4.1.-)	GT	Glycosyl Transferases	0.34	2.5e-13
gene3672	Chromosome	RP01	GT2_Glycos_transf_2		GT		0.56	3.6e-35
gene3673	Chromosome	RP01	GT4	sucrose synthase (EC 2.4.1.13); sucrose-phosphate synthase (EC 2.4.1.14); alpha-glucosyltransferase (EC 2.4.1.52); lipopolysaccharide N-acetylglucosaminyltransferase (EC 2.4.1.56); phosphatidylinositol alpha-mannosyltransferase (EC 2.4.1.57); GDP-Man: Man1GlcNAc2-PP-dolichol alpha-1,3-mannosyltransferase (EC 2.4.1.132); GDP-Man: Man3GlcNAc2-PP-dolichol/Man4GlcNAc2-PP-dolichol alpha-1,2-mannosyltr…	GT	Glycosyl Transferases	0.4	4.6e-37
gene3711	Chromosome	RP01	GT41	UDP-GlcNAc: peptide beta-N-acetylglucosaminyltransferase (EC 2.4.1.255); UDP-Glc: peptide N-beta-glucosyltransferase (EC 2.4.1.-)	GT	Glycosyl Transferases	0.39	1.8e-10
gene3778	Chromosome	RP01	GT4	sucrose synthase (EC 2.4.1.13); sucrose-phosphate synthase (EC 2.4.1.14); alpha-glucosyltransferase (EC 2.4.1.52); lipopolysaccharide N-acetylglucosaminyltransferase (EC 2.4.1.56); phosphatidylinositol alpha-mannosyltransferase (EC 2.4.1.57); GDP-Man: Man1GlcNAc2-PP-dolichol alpha-1,3-mannosyltransferase (EC 2.4.1.132); GDP-Man: Man3GlcNAc2-PP-dolichol/Man4GlcNAc2-PP-dolichol alpha-1,2-mannosyltr…	GT	Glycosyl Transferases	0.36	6.4e-08
gene3779	Chromosome	RP01	GT2_Glycos_transf_2		GT		0.52	6.6e-40
gene3784	Chromosome	RP01	GT4	sucrose synthase (EC 2.4.1.13); sucrose-phosphate synthase (EC 2.4.1.14); alpha-glucosyltransferase (EC 2.4.1.52); lipopolysaccharide N-acetylglucosaminyltransferase (EC 2.4.1.56); phosphatidylinositol alpha-mannosyltransferase (EC 2.4.1.57); GDP-Man: Man1GlcNAc2-PP-dolichol alpha-1,3-mannosyltransferase (EC 2.4.1.132); GDP-Man: Man3GlcNAc2-PP-dolichol/Man4GlcNAc2-PP-dolichol alpha-1,2-mannosyltr…	GT	Glycosyl Transferases	0.37	2.9e-29
gene3793	Chromosome	RP01	GT26	UDP-ManNAcA: beta-N-acetyl mannosaminuronyltransferase (EC 2.4.1.-); UDP-ManNAc: beta-N-acetyl-mannosaminyltransferase (EC 2.4.1.-); UDP-Glc: beta-1,4-glucosyltransferase (EC 2.4.1.-); beta-1,4-galactosyltransferase (EC 2.4.1.-)	GT	Glycosyl Transferases	0.65	5.3e-62
gene3804	Chromosome	RP01	GT19	lipid-A-disaccharide synthase (EC 2.4.1.182).	GT	Glycosyl Transferases	0.36	3.2e-09
gene3806	Chromosome	RP01	GT4	sucrose synthase (EC 2.4.1.13); sucrose-phosphate synthase (EC 2.4.1.14); alpha-glucosyltransferase (EC 2.4.1.52); lipopolysaccharide N-acetylglucosaminyltransferase (EC 2.4.1.56); phosphatidylinositol alpha-mannosyltransferase (EC 2.4.1.57); GDP-Man: Man1GlcNAc2-PP-dolichol alpha-1,3-mannosyltransferase (EC 2.4.1.132); GDP-Man: Man3GlcNAc2-PP-dolichol/Man4GlcNAc2-PP-dolichol alpha-1,2-mannosyltr…	GT	Glycosyl Transferases	0.35	1.2e-23
gene3807	Chromosome	RP01	GT33	GDP-Man: chitobiosyldiphosphodolichol beta-mannosyltransferase (EC 2.4.1.142).	GT	Glycosyl Transferases	0.31	8.7e-14
gene3851	Chromosome	RP01	GT41	UDP-GlcNAc: peptide beta-N-acetylglucosaminyltransferase (EC 2.4.1.255); UDP-Glc: peptide N-beta-glucosyltransferase (EC 2.4.1.-)	GT	Glycosyl Transferases	0.4	3.3e-11
gene4001	Chromosome	RP01	GT2_Glycos_transf_2		GT		0.59	1.6e-28
gene4050	Chromosome	RP01	GT8	lipopolysaccharide alpha-1,3-galactosyltransferase (EC 2.4.1.44); UDP-Glc: (glucosyl)lipopolysaccharide alpha-1,2-glucosyltransferase (EC 2.4.1.-); lipopolysaccharide glucosyltransferase 1 (EC 2.4.1.58); glycogenin glucosyltransferase (EC 2.4.1.186); inositol 1-alpha-galactosyltransferase (galactinol synthase) (EC 2.4.1.123); homogalacturonan alpha-1,4-galacturonosyltransferase (EC 2.4.1.43); UDP…	GT	Glycosyl Transferases	0.89	6.4e-62
gene4152	Chromosome	RP01	GT83	undecaprenyl phosphate-alpha-L-Ara4N: 4-amino-4-deoxy-beta-L-arabinosyltransferase (EC 2.4.2.43); dodecaprenyl phosphate-beta-galacturonic acid: lipopolysaccharide core alpha-galacturonosyl transferase (EC 2.4.1.-)	GT	Glycosyl Transferases	0.34	1.6e-38
gene4153	Chromosome	RP01	GT2_Glycos_transf_2		GT		0.49	1.1e-35
gene4174	Chromosome	RP01	GT83	undecaprenyl phosphate-alpha-L-Ara4N: 4-amino-4-deoxy-beta-L-arabinosyltransferase (EC 2.4.2.43); dodecaprenyl phosphate-beta-galacturonic acid: lipopolysaccharide core alpha-galacturonosyl transferase (EC 2.4.1.-)	GT	Glycosyl Transferases	0.3	3.2e-42
gene4195	Chromosome	RP01	GT2_Glyco_tranf_2_3		GT		0.55	5e-32
gene1455	Chromosome	RP01	PL11	rhamnogalacturonan endolyase (EC 4.2.2.23); rhamnogalacturonan exolyase (EC 4.2.2.24)	PL	Polysaccharide Lyases	0.94	1.8e-303
gene1457	Chromosome	RP01	PL11	rhamnogalacturonan endolyase (EC 4.2.2.23); rhamnogalacturonan exolyase (EC 4.2.2.24)	PL	Polysaccharide Lyases	0.96	8.7e-293
gene1461	Chromosome	RP01	PL26	rhamnogalacturonan exolyase (EC 4.2.2.24).	PL	Polysaccharide Lyases	0.97	0
gene1482	Chromosome	RP01	PL1_6	PL1's subfamily	PL	Polysaccharide Lyases	0.48	2.1e-99
gene2091	Chromosome	RP01	PL9_2	PL9's subfamily	PL	Polysaccharide Lyases	0.8	3.4e-130
gene2092	Chromosome	RP01	PL9_2	PL9's subfamily	PL	Polysaccharide Lyases	0.47	3e-09
gene3091	Chromosome	RP01	PL1_8	PL1's subfamily	PL	Polysaccharide Lyases	0.39	2e-99
gene3722	Chromosome	RP01	PL3_1	PL3's subfamily	PL	Polysaccharide Lyases	0.77	6.4e-76
gene4103	Chromosome	RP01	PL1_5	PL1's subfamily	PL	Polysaccharide Lyases	0.52	1.1e-76
gene2027	Chromosome	RP01	CBM50	Modules of approx. 50 residues found attached to various enzymes from families GH18, GH19, GH23, GH24, GH25 and GH73, i.e. enzymes cleaving either chitin or peptidoglycan. Binding to chitopentaose demonstrated in the case of Pteris ryukyuensis chitinase A [Ohnuma T et al. (2008) J. Biol. Chem. 283:5178-87 (PMID: 18083709)]. CBM50 modules are also found in a multitude of other enzymes targeting th…	CBM	Carbohydrate-Binding Modules	0.41	8.7e-07
gene2291	Chromosome	RP01	CBM63	The CBM63 module of Bacillus subtilis expansin EXLX1 has been shown to bind cellulose.	CBM	Carbohydrate-Binding Modules	0.33	1.1e-40
