# Supplementary material for: Bacillus paralicheniformis RP01 Enhances the Expression of Growth-Related Genes in Cotton and Promotes Plant Growth by Altering Microbiota inside and outside the Root
Source: Int J Mol Sci. 2023 Apr 13;24(8):7227. doi: 10.3390/ijms24087227 (PMC10138817; doi:10.3390/ijms24087227)
Supplement: Supplementary file 1 [file ijms-24-07227-s001.zip › Supplementary file Table S7.xlsx]

## Sheet: Supplementary file Table S7
Table S7: Secondary metabolites biosynthetic gene clusters prediction in RP01
(A.) Statistics of secondary metabolites synthesis gene clusters
Location	Cluster ID	Sample Name	Type	Start	End	MIBiG accession	Similar Cluster	Similarity(%)	Gene No.	Predict Core Structure
Chromosome	cluster1	RP01	lanthipeptide	161140	187748	-	-	-	24	-
Chromosome	cluster2	RP01	NRPS	380537	445374	BGC0000381	lichenysin	100	41	NC(CCC(=O)N)C(=O)NC(CC(C)C)C(=O)NC(CC(C)C)C(=O)NC(
Chromosome	cluster3	RP01	thiopeptide	1098603	1139806	BGC0000693	butirosin A / butirosin B	7	40	-
Chromosome	cluster4	RP01	siderophore	1262173	1277637	-	-	-	10	-
Chromosome	cluster5	RP01	NRPS	2104168	2189029	BGC0001095	fengycin	93	50	NC(CCC(=O)O)C(=O)NC(CCCN)C(=O)NC(Cc1ccc(O)cc1)C(=O
Chromosome	cluster6	RP01	terpene	2284344	2306234	-	-	-	18	-
Chromosome	cluster7	RP01	T3PKS	2355654	2396752	-	-	-	49	-
Chromosome	cluster8	RP01	NRPS	2569478	2611908	BGC0000310	bacitracin	44	19	NC(C(C)CC)C(=O)NC(CS)C(=O)NC(CC(C)C)C(=O)NC(CCC(=O
Chromosome	cluster9	RP01	bacteriocin	2707189	2717534	-	-	-	14	-
Chromosome	cluster10	RP01	CDPS	3571083	3591833	-	-	-	21	-
Chromosome	cluster11	RP01	NRPS	3852493	3902249	BGC0000309	bacillibactin	53	43	NCC(=O)NC(C(O)C)C(=O)O
Chromosome	cluster12	RP01	lassopeptide	4002530	4024992	-	-	-	20	-
(B.) Gene detail table of secondary metabolites synthesis gene clusters
Gene ID	Location	Sample Name	Cluster ID	NR Description
gene0186	Chromosome	RP01	cluster1	intracellular serine protease LanP
gene0187	Chromosome	RP01	cluster1	MULTISPECIES: ABC transporter permease
gene0188	Chromosome	RP01	cluster1	MULTISPECIES: hypothetical protein
gene0189	Chromosome	RP01	cluster1	MULTISPECIES: ABC transporter ATP-binding protein
gene0190	Chromosome	RP01	cluster1	MULTISPECIES: helix-turn-helix transcriptional regulator
gene0191	Chromosome	RP01	cluster1	MULTISPECIES: ABC transporter permease
gene0192	Chromosome	RP01	cluster1	MULTISPECIES: ABC transporter permease
gene0193	Chromosome	RP01	cluster1	MULTISPECIES: ABC transporter ATP-binding protein
gene0194	Chromosome	RP01	cluster1	MULTISPECIES: hypothetical protein
gene0195	Chromosome	RP01	cluster1	MULTISPECIES: peptidase domain-containing ABC transporter
gene0196	Chromosome	RP01	cluster1	MULTISPECIES: type 2 lantipeptide synthetase LanM family protein
gene0197	Chromosome	RP01	cluster1	lichenicidin prepeptide LanA-like protein
gene0198	Chromosome	RP01	cluster1	type 2 lantipeptide synthetase LanM family protein
gene0199	Chromosome	RP01	cluster1	MULTISPECIES: plantaricin C family lantibiotic
gene0200	Chromosome	RP01	cluster1	GHKL domain-containing protein
gene0201	Chromosome	RP01	cluster1	MULTISPECIES: accessory gene regulator B family protein
gene0202	Chromosome	RP01	cluster1	MULTISPECIES: cyclic lactone autoinducer peptide
gene0203	Chromosome	RP01	cluster1	MULTISPECIES: LytTR family DNA-binding domain-containing protein
gene0204	Chromosome	RP01	cluster1	MULTISPECIES: YbaK family protein
gene0205	Chromosome	RP01	cluster1	MULTISPECIES: N-acetylmuramoyl-L-alanine amidase CwlD
gene0206	Chromosome	RP01	cluster1	ATP-binding protein Mrp
gene0207	Chromosome	RP01	cluster1	spore gernimation protein GerD
gene0208	Chromosome	RP01	cluster1	MULTISPECIES: KinB-signaling pathway activation protein
gene0209	Chromosome	RP01	cluster1	MULTISPECIES: polysaccharide deacetylase family sporulation protein PdaB
gene0409	Chromosome	RP01	cluster2	hypothetical protein
gene0410	Chromosome	RP01	cluster2	MULTISPECIES: acetylxylan esterase
gene0411	Chromosome	RP01	cluster2	putative transcriptional regulator YdgG
gene0412	Chromosome	RP01	cluster2	MULTISPECIES: DUF3147 family protein
gene0413	Chromosome	RP01	cluster2	MULTISPECIES: amino acid ABC transporter permease
gene0414	Chromosome	RP01	cluster2	MULTISPECIES: transporter substrate-binding domain-containing protein
gene0415	Chromosome	RP01	cluster2	MULTISPECIES: NAD(P)H-dependent oxidoreductase
gene0416	Chromosome	RP01	cluster2	MULTISPECIES: AAA family ATPase
gene0417	Chromosome	RP01	cluster2	Beta-glucosidase 6-phospho-beta-glucosidase
gene0418	Chromosome	RP01	cluster2	MULTISPECIES: competence protein ComJ
gene0419	Chromosome	RP01	cluster2	MULTISPECIES: endonuclease NucA
gene0420	Chromosome	RP01	cluster2	MULTISPECIES: protein kinase
gene0421	Chromosome	RP01	cluster2	MULTISPECIES: LXG domain-containing protein
gene0422	Chromosome	RP01	cluster2	MULTISPECIES: hydantoinase/oxoprolinase family protein
gene0423	Chromosome	RP01	cluster2	hydantoinase B/oxoprolinase family protein
gene0424	Chromosome	RP01	cluster2	putative spermidine/putrescine ABC transporter solute-binding protein
gene0425	Chromosome	RP01	cluster2	MULTISPECIES: ABC transporter ATP-binding protein
gene0426	Chromosome	RP01	cluster2	MULTISPECIES: ABC transporter permease
gene0427	Chromosome	RP01	cluster2	MULTISPECIES: ABC transporter permease
gene0428	Chromosome	RP01	cluster2	lichenysin non-ribosomal peptide synthetase LicA
gene0429	Chromosome	RP01	cluster2	lichenysin non-ribosomal peptide synthetase LicB
gene0430	Chromosome	RP01	cluster2	MULTISPECIES: lichenysin non-ribosomal peptide synthetase LicC
gene0431	Chromosome	RP01	cluster2	MULTISPECIES: lichenysin biosynthesis thioesterase LicTE
gene0432	Chromosome	RP01	cluster2	MULTISPECIES: DMT family transporter
gene0433	Chromosome	RP01	cluster2	MULTISPECIES: PLP-dependent aminotransferase family protein
gene0434	Chromosome	RP01	cluster2	MULTISPECIES: 4'-phosphopantetheinyl transferase superfamily protein
gene0435	Chromosome	RP01	cluster2	MULTISPECIES: alpha/beta hydrolase
gene0436	Chromosome	RP01	cluster2	MULTISPECIES: AraC family transcriptional regulator
gene0437	Chromosome	RP01	cluster2	MULTISPECIES: YitT family protein
gene0438	Chromosome	RP01	cluster2	hypothetical protein
gene0439	Chromosome	RP01	cluster2	hypothetical protein
gene0440	Chromosome	RP01	cluster2	L-2,4-diaminobutyrate decarboxylase
gene0441	Chromosome	RP01	cluster2	MULTISPECIES: methyl-accepting chemotaxis protein
gene0442	Chromosome	RP01	cluster2	MULTISPECIES: amino acid ABC transporter ATP-binding protein
gene0443	Chromosome	RP01	cluster2	MULTISPECIES: amino acid ABC transporter permease
gene0444	Chromosome	RP01	cluster2	MULTISPECIES: cystine ABC transporter substrate-binding lipoprotein TcyA
gene0445	Chromosome	RP01	cluster2	transcriptional regulator RocR
gene0446	Chromosome	RP01	cluster2	MULTISPECIES: ornithine--oxo-acid transaminase
gene0447	Chromosome	RP01	cluster2	MULTISPECIES: amino acid permease
gene0448	Chromosome	RP01	cluster2	MULTISPECIES: arginase
gene0449	Chromosome	RP01	cluster2	LysR family transcriptional regulator
gene1100	Chromosome	RP01	cluster3	MULTISPECIES: YhdX family protein
gene1101	Chromosome	RP01	cluster3	MULTISPECIES: mechanosensitive ion channel family protein
gene1102	Chromosome	RP01	cluster3	MULTISPECIES: NAD-dependent protein deacylase
gene1103	Chromosome	RP01	cluster3	MULTISPECIES: GNAT family N-acetyltransferase
gene1104	Chromosome	RP01	cluster3	MULTISPECIES: polysaccharide deacetylase
gene1105	Chromosome	RP01	cluster3	MULTISPECIES: D-amino-acid transaminase
gene1106	Chromosome	RP01	cluster3	MULTISPECIES: Na+/H+ antiporter NhaC
gene1107	Chromosome	RP01	cluster3	MULTISPECIES: aldose 1-epimerase
gene1108	Chromosome	RP01	cluster3	MULTISPECIES: hypothetical protein
gene1109	Chromosome	RP01	cluster3	Uncharacterised protein
gene1110	Chromosome	RP01	cluster3	MULTISPECIES: DUF4944 domain-containing protein
gene1111	Chromosome	RP01	cluster3	MULTISPECIES: TOMM precursor leader peptide-binding protein
gene1112	Chromosome	RP01	cluster3	MULTISPECIES: putative thiazole-containing bacteriocin maturation protein
gene1113	Chromosome	RP01	cluster3	MULTISPECIES: universal stress protein
gene1114	Chromosome	RP01	cluster3	MULTISPECIES: ABC transporter ATP-binding protein/permease
gene1115	Chromosome	RP01	cluster3	MULTISPECIES: ABC transporter ATP-binding protein/permease
gene1116	Chromosome	RP01	cluster3	MULTISPECIES: NAD(P)H-binding protein
gene1117	Chromosome	RP01	cluster3	MULTISPECIES: hypothetical protein
gene1118	Chromosome	RP01	cluster3	MULTISPECIES: alpha/beta-type small acid-soluble spore protein
gene1119	Chromosome	RP01	cluster3	MULTISPECIES: hypothetical protein
gene1120	Chromosome	RP01	cluster3	MULTISPECIES: sn-glycerol-3-phosphate ABC transporter ATP-binding protein UgpC
gene1121	Chromosome	RP01	cluster3	MULTISPECIES: helix-turn-helix domain-containing protein
gene1122	Chromosome	RP01	cluster3	MULTISPECIES: YheE family protein
gene1123	Chromosome	RP01	cluster3	MULTISPECIES: YheC/YheD family protein
gene1124	Chromosome	RP01	cluster3	endospore coat-associated protein YheD
gene1125	Chromosome	RP01	cluster3	hypothetical protein
gene1126	Chromosome	RP01	cluster3	MULTISPECIES: YlbF family regulator
gene1127	Chromosome	RP01	cluster3	MULTISPECIES: Cof-type HAD-IIB family hydrolase
gene1128	Chromosome	RP01	cluster3	oxygen-independent coproporphyrinogen-III oxidase 2
gene1129	Chromosome	RP01	cluster3	MULTISPECIES: cation:proton antiporter
gene1130	Chromosome	RP01	cluster3	MULTISPECIES: cation:proton antiporter regulatory subunit
gene1131	Chromosome	RP01	cluster3	MULTISPECIES: hypothetical protein
gene1132	Chromosome	RP01	cluster3	MULTISPECIES: enoyl-CoA hydratase
gene1133	Chromosome	RP01	cluster3	MULTISPECIES: tetratricopeptide repeat protein
gene1134	Chromosome	RP01	cluster3	MULTISPECIES: hypothetical protein
gene1135	Chromosome	RP01	cluster3	MULTISPECIES: hypothetical protein
gene1136	Chromosome	RP01	cluster3	MULTISPECIES: hypothetical protein
gene1137	Chromosome	RP01	cluster3	MULTISPECIES: ABC transporter ATP-binding protein
gene1138	Chromosome	RP01	cluster3	MULTISPECIES: ABC transporter permease
gene1139	Chromosome	RP01	cluster3	MULTISPECIES: exonuclease SbcCD subunit D
gene1255	Chromosome	RP01	cluster4	aspartate aminotransferase
gene1256	Chromosome	RP01	cluster4	MULTISPECIES: aspartate aminotransferase family protein
gene1257	Chromosome	RP01	cluster4	MULTISPECIES: aspartate aminotransferase family protein
gene1258	Chromosome	RP01	cluster4	MULTISPECIES: siderophore biosynthesis protein IucA
gene1259	Chromosome	RP01	cluster4	MULTISPECIES: acetyltransferase
gene1260	Chromosome	RP01	cluster4	MULTISPECIES: lysine N(6)-hydroxylase/L-ornithine N(5)-oxygenase family protein
gene1261	Chromosome	RP01	cluster4	MULTISPECIES: IucA/IucC family siderophore biosynthesis protein
gene1262	Chromosome	RP01	cluster4	MULTISPECIES: GNAT family N-acetyltransferase
gene1263	Chromosome	RP01	cluster4	MULTISPECIES: dehydrogenase/reductase SDR family member 1
gene1264	Chromosome	RP01	cluster4	MULTISPECIES: YafY family transcriptional regulator
gene2123	Chromosome	RP01	cluster5	arsenical pump membrane protein
gene2124	Chromosome	RP01	cluster5	metalloregulator ArsR/SmtB family transcription factor
gene2125	Chromosome	RP01	cluster5	MULTISPECIES: YdeI family protein
gene2126	Chromosome	RP01	cluster5	MULTISPECIES: endonuclease/exonuclease/phosphatase family protein
gene2127	Chromosome	RP01	cluster5	MULTISPECIES: RhaT/GlcU family sugar-proton symporter
gene2128	Chromosome	RP01	cluster5	MULTISPECIES: family 10 glycosylhydrolase
gene2129	Chromosome	RP01	cluster5	MULTISPECIES: oligoribonuclease
gene2130	Chromosome	RP01	cluster5	MULTISPECIES: pyruvate formate lyase-activating protein
gene2131	Chromosome	RP01	cluster5	formate C-acetyltransferase
gene2132	Chromosome	RP01	cluster5	MULTISPECIES: glycosyltransferase family 4 protein
gene2133	Chromosome	RP01	cluster5	MULTISPECIES: D-alanyl-D-alanine carboxypeptidase/D-alanyl-D-alanine-endopeptidase
gene2134	Chromosome	RP01	cluster5	MULTISPECIES: hypothetical protein
gene2135	Chromosome	RP01	cluster5	MULTISPECIES: ABC transporter permease
gene2136	Chromosome	RP01	cluster5	Fluoroquinolones export ATP-binding protein
gene2137	Chromosome	RP01	cluster5	Fluoroquinolones export ATP-binding protein
gene2138	Chromosome	RP01	cluster5	TetR/AcrR family transcriptional regulator
gene2139	Chromosome	RP01	cluster5	NAD(P)/FAD-dependent oxidoreductase
gene2140	Chromosome	RP01	cluster5	MULTISPECIES: DUF1641 domain-containing protein
gene2141	Chromosome	RP01	cluster5	hypothetical protein
gene2142	Chromosome	RP01	cluster5	MULTISPECIES: excisionase family DNA-binding protein
gene2143	Chromosome	RP01	cluster5	MULTISPECIES: hypothetical protein
gene2144	Chromosome	RP01	cluster5	MULTISPECIES: AMP-binding protein
gene2145	Chromosome	RP01	cluster5	MULTISPECIES: acyl-CoA carboxylase subunit beta
gene2146	Chromosome	RP01	cluster5	MULTISPECIES: enoyl-CoA hydratase
gene2147	Chromosome	RP01	cluster5	MULTISPECIES: hydroxymethylglutaryl-CoA lyase
gene2148	Chromosome	RP01	cluster5	MULTISPECIES: acetyl-CoA carboxylase biotin carboxyl carrier protein subunit
gene2149	Chromosome	RP01	cluster5	acetyl-CoA carboxylase biotin carboxylase subunit
gene2150	Chromosome	RP01	cluster5	non-ribosomal peptide synthase
gene2151	Chromosome	RP01	cluster5	amino acid adenylation domain-containing protein
gene2152	Chromosome	RP01	cluster5	amino acid adenylation domain-containing protein
gene2153	Chromosome	RP01	cluster5	amino acid adenylation domain-containing protein
gene2154	Chromosome	RP01	cluster5	non-ribosomal peptide synthetase
gene2155	Chromosome	RP01	cluster5	AMP-binding protein
gene2156	Chromosome	RP01	cluster5	MULTISPECIES: acyl-CoA dehydrogenase family protein
gene2157	Chromosome	RP01	cluster5	MULTISPECIES: NAD(P)H-dependent oxidoreductase
gene2158	Chromosome	RP01	cluster5	MULTISPECIES: helix-turn-helix transcriptional regulator
gene2159	Chromosome	RP01	cluster5	glutamate-5-semialdehyde dehydrogenase
gene2160	Chromosome	RP01	cluster5	glutamate 5-kinase
gene2161	Chromosome	RP01	cluster5	hypothetical protein
gene2162	Chromosome	RP01	cluster5	MULTISPECIES: DUF421 domain-containing protein
gene2163	Chromosome	RP01	cluster5	inorganic phosphate transporter family protein
gene2164	Chromosome	RP01	cluster5	MULTISPECIES: phosphoadenylyl-sulfate reductase
gene2165	Chromosome	RP01	cluster5	phosphosulfolactate synthase
gene2166	Chromosome	RP01	cluster5	MULTISPECIES: YitT family protein
gene2167	Chromosome	RP01	cluster5	MULTISPECIES: mandelate racemase/muconate lactonizing enzyme family protein
gene2168	Chromosome	RP01	cluster5	MULTISPECIES: MFS transporter
gene2169	Chromosome	RP01	cluster5	MULTISPECIES: glycosyltransferase family 2 protein
gene2170	Chromosome	RP01	cluster5	putative integral inner membrane protein
gene2171	Chromosome	RP01	cluster5	hypothetical protein
gene2172	Chromosome	RP01	cluster5	MULTISPECIES: glutamate synthase small subunit
gene2263	Chromosome	RP01	cluster6	MULTISPECIES: serine hydrolase
gene2264	Chromosome	RP01	cluster6	hypothetical protein
gene2265	Chromosome	RP01	cluster6	MULTISPECIES: integrase
gene2266	Chromosome	RP01	cluster6	aminotransferase class I and II family protein
gene2267	Chromosome	RP01	cluster6	MULTISPECIES: TraR/DksA C4-type zinc finger protein
gene2268	Chromosome	RP01	cluster6	MULTISPECIES: PH domain-containing protein
gene2269	Chromosome	RP01	cluster6	MULTISPECIES: DUF6501 family protein
gene2270	Chromosome	RP01	cluster6	DhaS
gene2271	Chromosome	RP01	cluster6	hypothetical protein
gene2272	Chromosome	RP01	cluster6	MULTISPECIES: GNAT family N-acetyltransferase
gene2273	Chromosome	RP01	cluster6	MULTISPECIES: cytidine deaminase
gene2274	Chromosome	RP01	cluster6	MULTISPECIES: squalene--hopene cyclase
gene2275	Chromosome	RP01	cluster6	MULTISPECIES: superoxide dismutase
gene2276	Chromosome	RP01	cluster6	MULTISPECIES: hypothetical protein
gene2277	Chromosome	RP01	cluster6	MULTISPECIES: sodium-dependent transporter
gene2278	Chromosome	RP01	cluster6	MULTISPECIES: bile acid:sodium symporter family protein
gene2279	Chromosome	RP01	cluster6	MULTISPECIES: 2-oxoglutarate dehydrogenase complex dihydrolipoyllysine-residue succinyltransferase
gene2280	Chromosome	RP01	cluster6	2-oxoglutarate dehydrogenase E1 component
gene2343	Chromosome	RP01	cluster7	class I SAM-dependent methyltransferase
gene2344	Chromosome	RP01	cluster7	MULTISPECIES: BrxA/BrxB family bacilliredoxin
gene2345	Chromosome	RP01	cluster7	MULTISPECIES: dihydroxy-acid dehydratase
gene2346	Chromosome	RP01	cluster7	MULTISPECIES: conserved virulence factor C family protein
gene2347	Chromosome	RP01	cluster7	MULTISPECIES: HD domain-containing protein
gene2348	Chromosome	RP01	cluster7	MULTISPECIES: glutathione peroxidase
gene2349	Chromosome	RP01	cluster7	formate--tetrahydrofolate ligase
gene2350	Chromosome	RP01	cluster7	MULTISPECIES: homoserine O-succinyltransferase
gene2351	Chromosome	RP01	cluster7	MULTISPECIES: diglucosyl diacylglycerol synthase
gene2352	Chromosome	RP01	cluster7	MULTISPECIES: AIM24 family protein
gene2353	Chromosome	RP01	cluster7	MULTISPECIES: cold-shock protein CspD
gene2354	Chromosome	RP01	cluster7	MULTISPECIES: hypothetical protein
gene2355	Chromosome	RP01	cluster7	MULTISPECIES: DUF2564 family protein
gene2356	Chromosome	RP01	cluster7	MULTISPECIES: zinc-finger domain-containing protein
gene2357	Chromosome	RP01	cluster7	reverse transcriptase-like protein
gene2358	Chromosome	RP01	cluster7	queuosine precursor transporter
gene2359	Chromosome	RP01	cluster7	reverse transcriptase-like protein
gene2360	Chromosome	RP01	cluster7	MULTISPECIES: small, acid-soluble spore protein L
gene2361	Chromosome	RP01	cluster7	putative 5'-3' exonuclease Bsu YpcP
gene2362	Chromosome	RP01	cluster7	MULTISPECIES: hypothetical protein
gene2363	Chromosome	RP01	cluster7	hypothetical protein
gene2364	Chromosome	RP01	cluster7	dynamin family protein
gene2365	Chromosome	RP01	cluster7	MULTISPECIES: Fur-regulated basic protein FbpC
gene2366	Chromosome	RP01	cluster7	MULTISPECIES: methyltransferase YpbQ
gene2367	Chromosome	RP01	cluster7	MULTISPECIES: chalcone synthase BcsA
gene2368	Chromosome	RP01	cluster7	GNAT family N-acetyltransferase
gene2369	Chromosome	RP01	cluster7	purine permease
gene2370	Chromosome	RP01	cluster7	MULTISPECIES: xanthine phosphoribosyltransferase
gene2371	Chromosome	RP01	cluster7	Thermostable carboxypeptidase 1
gene2372	Chromosome	RP01	cluster7	ATP-dependent DNA helicase
gene2373	Chromosome	RP01	cluster7	MULTISPECIES: hypothetical protein
gene2374	Chromosome	RP01	cluster7	MULTISPECIES: hypothetical protein
gene2375	Chromosome	RP01	cluster7	MULTISPECIES: hypothetical protein
gene2376	Chromosome	RP01	cluster7	MULTISPECIES: class I SAM-dependent RNA methyltransferase
gene2377	Chromosome	RP01	cluster7	MULTISPECIES: cell division regulator GpsB
gene2378	Chromosome	RP01	cluster7	MULTISPECIES: DUF1273 domain-containing protein
gene2379	Chromosome	RP01	cluster7	CotD family spore coat protein
gene2380	Chromosome	RP01	cluster7	hypothetical protein
gene2381	Chromosome	RP01	cluster7	MULTISPECIES: ribonuclease H-like domain-containing protein
gene2382	Chromosome	RP01	cluster7	ATP-dependent helicase
gene2383	Chromosome	RP01	cluster7	MULTISPECIES: PTS glucose transporter subunit IIA
gene2384	Chromosome	RP01	cluster7	MULTISPECIES: hypothetical protein
gene2385	Chromosome	RP01	cluster7	MULTISPECIES: YppG family protein
gene2386	Chromosome	RP01	cluster7	YppF
gene2387	Chromosome	RP01	cluster7	MULTISPECIES: YppE family protein
gene2388	Chromosome	RP01	cluster7	MULTISPECIES: YppD family protein
gene2389	Chromosome	RP01	cluster7	MULTISPECIES: hypothetical protein
gene2390	Chromosome	RP01	cluster7	MULTISPECIES: DUF2515 domain-containing protein
gene2391	Chromosome	RP01	cluster7	MULTISPECIES: Holliday junction resolvase RecU
gene2567	Chromosome	RP01	cluster8	bacitracin non-ribosomal peptide synthetase BacB
gene2568	Chromosome	RP01	cluster8	bacitracin non-ribosomal peptide synthetase BacA
gene2569	Chromosome	RP01	cluster8	MULTISPECIES: thioesterase II family protein
gene2570	Chromosome	RP01	cluster8	MULTISPECIES: MFS transporter
gene2571	Chromosome	RP01	cluster8	hypothetical protein
gene2572	Chromosome	RP01	cluster8	MULTISPECIES: poly-gamma-glutamate hydrolase family protein
gene2573	Chromosome	RP01	cluster8	MULTISPECIES: SDR family oxidoreductase
gene2574	Chromosome	RP01	cluster8	beta-lactamase
gene2575	Chromosome	RP01	cluster8	MULTISPECIES: pyrroline-5-carboxylate reductase
gene2576	Chromosome	RP01	cluster8	amino acid degradation protein
gene2577	Chromosome	RP01	cluster8	NADPH dehydrogenase NamA
gene2578	Chromosome	RP01	cluster8	MULTISPECIES: alpha/beta hydrolase
gene2579	Chromosome	RP01	cluster8	MULTISPECIES: 50S ribosomal protein L33
gene2580	Chromosome	RP01	cluster8	MULTISPECIES: ribonuclease Z
gene2581	Chromosome	RP01	cluster8	glucose-6-phosphate 1-dehydrogenase
gene2582	Chromosome	RP01	cluster8	MULTISPECIES: TRAP transporter permease
gene2583	Chromosome	RP01	cluster8	MULTISPECIES: DUF1850 domain-containing protein
gene2584	Chromosome	RP01	cluster8	MULTISPECIES: TAXI family TRAP transporter solute-binding subunit
gene2585	Chromosome	RP01	cluster8	MULTISPECIES: GntR family transcriptional regulator
gene2692	Chromosome	RP01	cluster9	YqzD
gene2693	Chromosome	RP01	cluster9	MULTISPECIES: endolytic transglycosylase MltG
gene2694	Chromosome	RP01	cluster9	hypothetical protein
gene2695	Chromosome	RP01	cluster9	MULTISPECIES: hypothetical protein
gene2696	Chromosome	RP01	cluster9	MULTISPECIES: stage II sporulation protein M
gene2697	Chromosome	RP01	cluster9	MULTISPECIES: ABC transporter ATP-binding protein
gene2698	Chromosome	RP01	cluster9	MULTISPECIES: hypothetical protein
gene2699	Chromosome	RP01	cluster9	MULTISPECIES: uberolysin/carnocyclin family circular bacteriocin
gene2700	Chromosome	RP01	cluster9	MULTISPECIES: YIP1 family protein
gene2701	Chromosome	RP01	cluster9	putative transposase
gene2702	Chromosome	RP01	cluster9	MULTISPECIES: phosphate ABC transporter ATP-binding protein PstB
gene2703	Chromosome	RP01	cluster9	phosphate ABC transporter ATP-binding protein
gene2704	Chromosome	RP01	cluster9	MULTISPECIES: phosphate ABC transporter permease PstA
gene2705	Chromosome	RP01	cluster9	MULTISPECIES: phosphate ABC transporter permease subunit PstC
gene3593	Chromosome	RP01	cluster10	MULTISPECIES: DeoR/GlpR family DNA-binding transcription regulator
gene3594	Chromosome	RP01	cluster10	MULTISPECIES: rhamnulokinase
gene3595	Chromosome	RP01	cluster10	xylose isomerase
gene3596	Chromosome	RP01	cluster10	MULTISPECIES: hypothetical protein
gene3597	Chromosome	RP01	cluster10	MULTISPECIES: bifunctional rhamnulose-1-phosphate aldolase/short-chain dehydrogenase
gene3598	Chromosome	RP01	cluster10	MULTISPECIES: MFS transporter
gene3599	Chromosome	RP01	cluster10	MULTISPECIES: MFS transporter
gene3600	Chromosome	RP01	cluster10	MULTISPECIES: tRNA-dependent cyclodipeptide synthase
gene3601	Chromosome	RP01	cluster10	cytochrome P450, cyclodipeptide synthase-associated
gene3602	Chromosome	RP01	cluster10	MULTISPECIES: nuclear transport factor 2 family protein
gene3603	Chromosome	RP01	cluster10	MULTISPECIES: MarR family transcriptional regulator
gene3604	Chromosome	RP01	cluster10	Peptidase M22, glycoprotease
gene3605	Chromosome	RP01	cluster10	MULTISPECIES: oxidoreductase
gene3606	Chromosome	RP01	cluster10	MULTISPECIES: FMN-dependent NADH-azoreductase
gene3607	Chromosome	RP01	cluster10	MULTISPECIES: rhodanese-related sulfurtransferase
gene3608	Chromosome	RP01	cluster10	hypothetical protein
gene3609	Chromosome	RP01	cluster10	MULTISPECIES: hypothetical protein
gene3610	Chromosome	RP01	cluster10	MULTISPECIES: sigma-70 family RNA polymerase sigma factor
gene3611	Chromosome	RP01	cluster10	MULTISPECIES: YvrJ family protein
gene3612	Chromosome	RP01	cluster10	MULTISPECIES: oxalate decarboxylase family bicupin
gene3613	Chromosome	RP01	cluster10	MULTISPECIES: peptidase
gene3869	Chromosome	RP01	cluster11	MULTISPECIES: sporulation transcriptional regulator SpoIIID
gene3870	Chromosome	RP01	cluster11	MULTISPECIES: MarR family transcriptional regulator
gene3871	Chromosome	RP01	cluster11	MULTISPECIES: MFS transporter
gene3872	Chromosome	RP01	cluster11	undecaprenyl-diphosphatase BcrC
gene3873	Chromosome	RP01	cluster11	MULTISPECIES: manganese-dependent inorganic pyrophosphatase
gene3874	Chromosome	RP01	cluster11	MULTISPECIES: manganese catalase family protein
gene3875	Chromosome	RP01	cluster11	MULTISPECIES: DUF2071 domain-containing protein
gene3876	Chromosome	RP01	cluster11	bacterial regulatory s, tetR family protein
gene3877	Chromosome	RP01	cluster11	MULTISPECIES: NAD(P)H-binding protein
gene3878	Chromosome	RP01	cluster11	MULTISPECIES: CBS domain-containing protein
gene3879	Chromosome	RP01	cluster11	MULTISPECIES: magnesium transporter CorA family protein
gene3880	Chromosome	RP01	cluster11	MULTISPECIES: hemolysin family protein
gene3881	Chromosome	RP01	cluster11	MULTISPECIES: ammonium transporter
gene3882	Chromosome	RP01	cluster11	MULTISPECIES: P-II family nitrogen regulator
gene3883	Chromosome	RP01	cluster11	MULTISPECIES: ATP-dependent Clp protease proteolytic subunit
gene3884	Chromosome	RP01	cluster11	MULTISPECIES: RNA polymerase sigma factor
gene3885	Chromosome	RP01	cluster11	MULTISPECIES: M23 family metallopeptidase
gene3886	Chromosome	RP01	cluster11	MULTISPECIES: GNAT family N-acetyltransferase
gene3887	Chromosome	RP01	cluster11	MULTISPECIES: YwnF family protein
gene3888	Chromosome	RP01	cluster11	cardiolipin synthase
gene3889	Chromosome	RP01	cluster11	MULTISPECIES: multidrug efflux MFS transporter
gene3890	Chromosome	RP01	cluster11	MULTISPECIES: MbtH family protein
gene3891	Chromosome	RP01	cluster11	MULTISPECIES: non-ribosomal peptide synthetase
gene3892	Chromosome	RP01	cluster11	MULTISPECIES: isochorismatase family protein
gene3893	Chromosome	RP01	cluster11	MULTISPECIES: (2,3-dihydroxybenzoyl)adenylate synthase
gene3894	Chromosome	RP01	cluster11	isochorismate synthase
gene3895	Chromosome	RP01	cluster11	MULTISPECIES: 2,3-dihydro-2,3-dihydroxybenzoate dehydrogenase
gene3896	Chromosome	RP01	cluster11	MULTISPECIES: alpha/beta hydrolase
gene3897	Chromosome	RP01	cluster11	MULTISPECIES: iron ABC transporter permease
gene3898	Chromosome	RP01	cluster11	MULTISPECIES: iron ABC transporter permease
gene3899	Chromosome	RP01	cluster11	MULTISPECIES: iron-hydroxamate ABC transporter substrate-binding protein
gene3900	Chromosome	RP01	cluster11	MULTISPECIES: AraC family transcriptional regulator
gene3901	Chromosome	RP01	cluster11	DUF5362 family protein
gene3902	Chromosome	RP01	cluster11	MULTISPECIES: GNAT family N-acetyltransferase
gene3903	Chromosome	RP01	cluster11	MULTISPECIES: Rrf2 family transcriptional regulator
gene3904	Chromosome	RP01	cluster11	hypothetical protein
gene3905	Chromosome	RP01	cluster11	MULTISPECIES: hypothetical protein
gene3906	Chromosome	RP01	cluster11	MULTISPECIES: GTP 3',8-cyclase MoaA
gene3907	Chromosome	RP01	cluster11	MULTISPECIES: formate dehydrogenase accessory sulfurtransferase FdhD
gene3908	Chromosome	RP01	cluster11	MULTISPECIES: OFA family MFS transporter
gene3909	Chromosome	RP01	cluster11	FdhF/YdeP family oxidoreductase
gene3910	Chromosome	RP01	cluster11	hypothetical protein
gene3911	Chromosome	RP01	cluster11	MULTISPECIES: VWA domain-containing protein
gene4015	Chromosome	RP01	cluster12	MULTISPECIES: FtsW/RodA/SpoVE family cell cycle protein
gene4016	Chromosome	RP01	cluster12	MULTISPECIES: YjiH family protein
gene4017	Chromosome	RP01	cluster12	MULTISPECIES: spore morphogenesis/germination protein YwcE
gene4018	Chromosome	RP01	cluster12	hypothetical protein
gene4019	Chromosome	RP01	cluster12	MULTISPECIES: GNAT family N-acetyltransferase
gene4020	Chromosome	RP01	cluster12	MULTISPECIES: ABC transporter ATP-binding protein/permease
gene4021	Chromosome	RP01	cluster12	MULTISPECIES: ABC transporter ATP-binding protein/permease
gene4022	Chromosome	RP01	cluster12	MULTISPECIES: asparagine synthase
gene4023	Chromosome	RP01	cluster12	MULTISPECIES: lasso peptide biosynthesis B2 protein
gene4024	Chromosome	RP01	cluster12	MULTISPECIES: hypothetical protein
gene4025	Chromosome	RP01	cluster12	MULTISPECIES: response regulator transcription factor
gene4026	Chromosome	RP01	cluster12	hypothetical protein
gene4027	Chromosome	RP01	cluster12	MULTISPECIES: cytochrome aa3 quinol oxidase subunit IV
gene4028	Chromosome	RP01	cluster12	MULTISPECIES: cytochrome aa3 quinol oxidase subunit III
gene4029	Chromosome	RP01	cluster12	MULTISPECIES: cytochrome aa3 quinol oxidase subunit I
gene4030	Chromosome	RP01	cluster12	MULTISPECIES: cytochrome aa3 quinol oxidase subunit II
gene4031	Chromosome	RP01	cluster12	MULTISPECIES: UDP-glucose 4-epimerase GalE
gene4032	Chromosome	RP01	cluster12	MULTISPECIES: anti-repressor SinI family protein
gene4033	Chromosome	RP01	cluster12	MULTISPECIES: flavodoxin family protein
gene4034	Chromosome	RP01	cluster12	MULTISPECIES: DUF485 domain-containing protein
