# Supplementary material for: Bacillus paralicheniformis RP01 Enhances the Expression of Growth-Related Genes in Cotton and Promotes Plant Growth by Altering Microbiota inside and outside the Root
Source: Int J Mol Sci. 2023 Apr 13;24(8):7227. doi: 10.3390/ijms24087227 (PMC10138817; doi:10.3390/ijms24087227)
Supplement: Supplementary file 1 [file ijms-24-07227-s001.zip › Supplementary file Table S8.xlsx]

## Sheet: Supplementary file Table S8
Table S8. Antibiotic Resistance prediction of RP01
(A.) Classification statistics of antibiotic resistance genes				(B.)Detail table of antibiotic resistance genes
Sample Name	Drug Class	Gene No.		Gene ID	Location	Sample Name	ARO Name	ARO Accession	ARO Description	Drug Class	Resistance Mechanism	Identity(%)	Coverage(%)	Evalue	Score
RP01	macrolide antibiotic	56		gene0005	Chromosome	RP01	Streptomyces rishiriensis parY mutant conferring resistance to aminocoumarin	ARO:3003318	point mutation on the Streptomyces rishiriensis parY resulting in aminocoumarin resistance	aminocoumarin antibiotic	antibiotic target alteration	42.9	97.8	4.9e-147	1325
RP01	tetracycline antibiotic	45		gene0052	Chromosome	RP01	Staphylococcus mupA conferring resistance to mupirocin	ARO:3000521	An alternative isoleucyl-tRNA synthetase conferring resistance to mupirocin.	mupirocin	antibiotic target alteration	24.2	40.8	3.5e-10	145
RP01	fluoroquinolone antibiotic	32		gene0056	Chromosome	RP01	Erm(K)	ARO:3004643	23S rRNA (adenine(2058)-N(6))-methyltransferase Erm(K) [Bacillus halodurans]	lincosamide antibiotic;macrolide antibiotic;streptogramin antibiotic	antibiotic target alteration	32.7	68.2	2.4e-24	264
RP01	peptide antibiotic	28		gene0093	Chromosome	RP01	sul4	ARO:3004361	sul4 is a dihydropteroate synthase gene and mobile sulfonamide resistance gene shown to confer resistance when expressed in E. coli.	sulfonamide antibiotic	antibiotic target replacement	50.2	91.2	5.4e-77	718
RP01	glycopeptide antibiotic	27		gene0137	Chromosome	RP01	rpoB2	ARO:3000501	Due to gene duplication, the genomes of Nocardia species include both rifampin-sensitive beta-subunit of RNA polymerase (rpoB) and rifampin-resistant beta-subunit of RNA polymerase (rpoB2) genes, with ~88% similarity between the two gene products. Expression of the rpoB2 variant results in replacement of rifampin sensitivity with rifampin resistance.	peptide antibiotic;rifamycin antibiotic	antibiotic target alteration;antibiotic target replacement	62.5	67.4	2.1e-300	2650
RP01	penam	21		gene0142	Chromosome	RP01	tetT	ARO:3000193	Tet(T) is a ribosomal protection protein of streptococci. It is similar to Tet(Q).	tetracycline antibiotic	antibiotic target protection	26.9	96.8	2.5e-72	681
RP01	phenicol antibiotic	20		gene0175	Chromosome	RP01	patA	ARO:3000024	PatA is an ABC transporter of Streptococcus pneumoniae that interacts with PatB to confer fluoroquinolone resistance.	fluoroquinolone antibiotic	antibiotic efflux	30.6	80.8	3.2e-26	280
RP01	lincosamide antibiotic	18		gene0176	Chromosome	RP01	bcrA	ARO:3002987	bcrA is an ABC transporter found in Bacillus licheniformis that confers bacitracin resistance	peptide antibiotic	antibiotic efflux	33	68.2	9.1e-24	259
RP01	streptogramin antibiotic	17		gene0189	Chromosome	RP01	bcrA	ARO:3002987	bcrA is an ABC transporter found in Bacillus licheniformis that confers bacitracin resistance	peptide antibiotic	antibiotic efflux	40.7	97.3	4.8e-60	572
RP01	aminoglycoside antibiotic	15		gene0193	Chromosome	RP01	bcrA	ARO:3002987	bcrA is an ABC transporter found in Bacillus licheniformis that confers bacitracin resistance	peptide antibiotic	antibiotic efflux	46.3	97.1	3.5e-66	625
RP01	aminocoumarin antibiotic	15		gene0195	Chromosome	RP01	novA	ARO:3002522	A type III ABC transporter, identified on the novobiocin biosynthetic gene cluster, involved in the transport and resistance of novobiocin.	aminocoumarin antibiotic	antibiotic efflux	27.8	74	5.5e-54	523
RP01	rifamycin antibiotic	13		gene0223	Chromosome	RP01	Escherichia coli ampC1 beta-lactamase	ARO:3004611	An ampC-like beta-lactamase identified from Escherichia coli.	cephalosporin;penam	antibiotic inactivation	57.2	91.5	2.3e-138	1249
RP01	cephalosporin	12		gene0242	Chromosome	RP01	bcrA	ARO:3002987	bcrA is an ABC transporter found in Bacillus licheniformis that confers bacitracin resistance	peptide antibiotic	antibiotic efflux	34.8	70.6	2.2e-33	342
RP01	pleuromutilin antibiotic	11		gene0250	Chromosome	RP01	msbA	ARO:3003950	MsbA is a multidrug resistance transporter homolog from E. coli and belongs to a superfamily of transporters that contain an adenosine triphosphate (ATP) binding cassette (ABC) which is also called a nucleotide-binding domain (NBD). MsbA is a member of the MDR-ABC transporter group by sequence homology. MsbA transports lipid A, a major component of the bacterial outer cell membrane, and is the on…	nitroimidazole antibiotic	antibiotic efflux	29.4	98.4	6.8e-71	668
RP01	oxazolidinone antibiotic	11		gene0255	Chromosome	RP01	aadK	ARO:3002627	aadK is a chromosomal-encoded aminoglycoside nucleotidyltransferase gene in B. subtilis and Bacillus spp.	aminoglycoside antibiotic	antibiotic inactivation	50.6	91	5.2e-80	744
RP01	cephamycin	8		gene0291	Chromosome	RP01	vgbC	ARO:3003990	VgbC is a streptogramin B-type lyase found in Paenibacillus sp. LC231, a strain of Paenibacillus isolated from Lechuguilla Cave, NM, USA. Confers resistance to streptogramin B-type antibiotics by linearization of the lactone ring on an ester bond, resulting in antibiotic inactivation. Described by Pawlowski et al. 2016.	streptogramin antibiotic	antibiotic inactivation	59.2	99.3	6.1e-108	985
RP01	acridine dye	7		gene0308	Chromosome	RP01	blaR1	ARO:3000217	blaR1 is a transmembrane spanning and signal transducing protein which in response to interaction with beta-lactam antibiotics results in upregulation of the blaZ/blaR1/blaI operon.	penam	antibiotic inactivation	35.7	93.7	1.2e-99	916
RP01	nitroimidazole antibiotic	7		gene0309	Chromosome	RP01	mecI	ARO:3000124	mecI acts as a repressor of transcription of the mecA/mecR1/mecI operon.	carbapenem;cephalosporin;cephamycin;monobactam;penam	antibiotic target replacement	42.9	93	2.6e-23	252
RP01	carbapenem	6		gene0310	Chromosome	RP01	BCL-1	ARO:3004749	BCL-1 is a class A beta-lactamase found in Bacillus clausii.	penam	antibiotic inactivation	62.8	98.4	3.6e-103	944
RP01	monobactam	6		gene0323	Chromosome	RP01	vanRI	ARO:3003728	VanRI is the regulatory transcriptional activator in the VanSR regulator within the VanI glycopeptide resistance gene cluster.	glycopeptide antibiotic	antibiotic target alteration	37.2	97.4	1.1e-48	473
RP01	mupirocin	4		gene0324	Chromosome	RP01	vanSF	ARO:3002936	vanSF is a vanS variant found in the vanF gene cluster	glycopeptide antibiotic	antibiotic target alteration	27.9	79.4	4.7e-26	279
RP01	diaminopyrimidine antibiotic	3		gene0325	Chromosome	RP01	bcrA	ARO:3002987	bcrA is an ABC transporter found in Bacillus licheniformis that confers bacitracin resistance	peptide antibiotic	antibiotic efflux	46.7	96.2	3.1e-78	729
RP01	penem	3		gene0330	Chromosome	RP01	mphK	ARO:3004541	A chromosomal macrolide phosphotransferase identified from Bacillus subtilis	macrolide antibiotic	antibiotic inactivation	60.4	99.3	6e-111	1011
RP01	triclosan	3		gene0336	Chromosome	RP01	golS	ARO:3000504	GolS is a regulator activated by the presence of golD, and promotes the expression of the MdsABC efflux pump.	carbapenem;cephalosporin;cephamycin;monobactam;penam;penem;phenicol antibiotic	antibiotic efflux	25.2	43.6	1.5e-06	110
RP01	fosfomycin	3		gene0343	Chromosome	RP01	bcrA	ARO:3002987	bcrA is an ABC transporter found in Bacillus licheniformis that confers bacitracin resistance	peptide antibiotic	antibiotic efflux	50.9	87	3.7e-55	529
RP01	fusidic acid	2		gene0346	Chromosome	RP01	vanRM	ARO:3002928	vanRM is a vanR variant found in the vanM gene cluster	glycopeptide antibiotic	antibiotic target alteration	40	97.7	3.5e-36	365
RP01	glycylcycline	2		gene0380	Chromosome	RP01	bcrA	ARO:3002987	bcrA is an ABC transporter found in Bacillus licheniformis that confers bacitracin resistance	peptide antibiotic	antibiotic efflux	32.3	94.6	1.6e-36	369
RP01	sulfonamide antibiotic	1		gene0425	Chromosome	RP01	macB	ARO:3000535	MacB is an ATP-binding cassette (ABC) transporter that exports macrolides with 14- or 15- membered lactones. It forms an antibiotic efflux complex with MacA and TolC. macB corresponds to 1 locus in Pseudomonas aeruginosa PAO1 and 1 locus in Pseudomonas aeruginosa LESB58.	macrolide antibiotic	antibiotic efflux	33	51.9	2.6e-23	256
RP01	benzalkonium chloride	1		gene0442	Chromosome	RP01	macB	ARO:3000535	MacB is an ATP-binding cassette (ABC) transporter that exports macrolides with 14- or 15- membered lactones. It forms an antibiotic efflux complex with MacA and TolC. macB corresponds to 1 locus in Pseudomonas aeruginosa PAO1 and 1 locus in Pseudomonas aeruginosa LESB58.	macrolide antibiotic	antibiotic efflux	37.5	91.9	2.3e-31	324
				gene0466	Chromosome	RP01	vanRF	ARO:3002925	vanRF is a vanR variant found in the vanF gene cluster	glycopeptide antibiotic	antibiotic target alteration	26.6	27.3	5.3e-06	107
				gene0468	Chromosome	RP01	tetA(58)	ARO:3003980	TetA(58) is a Tetracycline efflux pump described in Paenibacillus sp. LC231, a strain of Paenibacillus isolated from Lechuguilla Cave, NM, USA. Described by Pawlowski et al. 2016.	tetracycline antibiotic	antibiotic efflux	25	42	1.7e-12	164
				gene0482	Chromosome	RP01	tetA(46)	ARO:3004032	tetA(46) is a subunit of tetAB(46), a heterodimeric ABC transporter, that is required for conferring tetracycline resistance in Streptococcus australis isolated from the oral cavity.	tetracycline antibiotic	antibiotic efflux	25.2	97.4	5.9e-10	139
				gene0484	Chromosome	RP01	vanRM	ARO:3002928	vanRM is a vanR variant found in the vanM gene cluster	glycopeptide antibiotic	antibiotic target alteration	43.2	99.1	3.2e-48	469
				gene0485	Chromosome	RP01	smeS	ARO:3003067	smeS is the protein kinase sensor component of a two component signal transduction system that includes smeR	aminoglycoside antibiotic;cephalosporin;cephamycin;penam	antibiotic efflux	29.1	61.9	4.5e-28	298
				gene0490	Chromosome	RP01	tlrC	ARO:3002827	tlrC is an ABC-F subfamily protein found in Streptomyces fradiae and confers resistance to mycinamicin, tylosin and lincosamides. tlrC is found in the tylosin biosynthetic cluster and is one mechanism by which S. fradiae protects itself from self-destruction when producing this macrolide.	lincosamide antibiotic;macrolide antibiotic;oxazolidinone antibiotic;phenicol antibiotic;pleuromutilin antibiotic;streptogramin antibiotic;tetracycline antibiotic	antibiotic target protection	27.8	70.8	2.5e-09	134
				gene0492	Chromosome	RP01	Staphylococcus aureus LmrS	ARO:3004572	MFS transporters are secondary active transporters with single-polypeptide chains containing 400-600 amino acids that transport small solutes across the membrane by using electrochemical gradients. LmrS has 14 transmembrane helices and, when expressed in E. coli, is capable of extruding a variety of antibiotics inclinding linezolid, trimethoprim, florfenicol, chlorampheniocol, erythromycin, strep…	aminoglycoside antibiotic;diaminopyrimidine antibiotic;macrolide antibiotic;oxazolidinone antibiotic;phenicol antibiotic	antibiotic efflux	42.2	97.9	3.7e-99	911
				gene0553	Chromosome	RP01	gimA	ARO:3000463	A macrolide glycosyltransferase encoded by the gimA gene in Streptomyces ambofaciens, a natural producer of the macrolide antibiotic spiramycin. Chalcomycin, methymycin, tylosin, pikromycin, rosaramicin, oleandomycin, josamycin, and carbomycin are preferred substrates of gimA glycosyltransferase, while erythromycin and spiramycin have notably low binding affinities. GimA may be able to inactivate…	macrolide antibiotic	antibiotic inactivation	29.1	97	4.2e-43	427
				gene0561	Chromosome	RP01	bcrA	ARO:3002987	bcrA is an ABC transporter found in Bacillus licheniformis that confers bacitracin resistance	peptide antibiotic	antibiotic efflux	36.3	95.8	2.8e-47	462
				gene0568	Chromosome	RP01	vanG	ARO:3002909	VanG is a D-Ala-D-Ala ligase homolog that can synthesize D-Ala-D-Ser, an alternative substrate for peptidoglycan synthesis that reduces vancomycin binding affinity in Enterococcus faecalis	glycopeptide antibiotic	antibiotic target alteration	36.8	95.8	6e-65	615
				gene0642	Chromosome	RP01	evgS	ARO:3000833	EvgS is a sensor protein that phosphorylates the regulatory protein EvgA. evgS corresponds to 1 locus in Pseudomonas aeruginosa PAO1 and 1 locus in Pseudomonas aeruginosa LESB58.	fluoroquinolone antibiotic;macrolide antibiotic;penam;tetracycline antibiotic	antibiotic efflux	28.1	42.5	1.7e-40	408
				gene0659	Chromosome	RP01	optrA	ARO:3003746	OptrA is a member of the ABC-F protein subfamily that confers resistance to oxazolidinones. The gene encoding the protein was originally isolated from a plasmid in Enterococcus faecalis and Enterococcus faecium.	lincosamide antibiotic;macrolide antibiotic;oxazolidinone antibiotic;phenicol antibiotic;pleuromutilin antibiotic;streptogramin antibiotic;tetracycline antibiotic	antibiotic target protection	38	97.5	2.9e-115	1051
				gene0671	Chromosome	RP01	vanWI	ARO:3003724	VanWI is a vanW variant found in the vanI gene cluster	glycopeptide antibiotic	antibiotic target alteration	39.4	54.1	6.9e-30	312
				gene0677	Chromosome	RP01	rphB	ARO:3003992	rphB is a rifampin phosphotransferase protein found in Paenibacillus sp. LC231, a strain of Paenibacillus isolated from Lechuguilla Cave, NM, USA. Confers resistance to rifamycin antibiotics, specifically rifampin, through rifampin inactivation. Described by Pawlowski et al. 2016.	rifamycin antibiotic	antibiotic inactivation	58.5	99.8	1.5e-292	2581
				gene0779	Chromosome	RP01	cmeB	ARO:3000784	CmeB is the inner membrane transporter the CmeABC multidrug efflux complex.	cephalosporin;fluoroquinolone antibiotic;fusidic acid;macrolide antibiotic	antibiotic efflux	22.9	72.7	1.1e-42	427
				gene0811	Chromosome	RP01	TaeA	ARO:3003986	Pleuromutilin (Tiamulin) ABC efflux pump found in Paenibacillus sp. LC231, a strain of Paenibacillus isolated from Lechuguilla Cave, NM, USA. Confers resistance to pleuromutilin antibiotics. Described by Pawlowski et al. 2016.	pleuromutilin antibiotic	antibiotic efflux	49.9	100	5.3e-178	1592
				gene0827	Chromosome	RP01	optrA	ARO:3003746	OptrA is a member of the ABC-F protein subfamily that confers resistance to oxazolidinones. The gene encoding the protein was originally isolated from a plasmid in Enterococcus faecalis and Enterococcus faecium.	lincosamide antibiotic;macrolide antibiotic;oxazolidinone antibiotic;phenicol antibiotic;pleuromutilin antibiotic;streptogramin antibiotic;tetracycline antibiotic	antibiotic target protection	33.9	94	1.1e-83	778
				gene0833	Chromosome	RP01	macB	ARO:3000535	MacB is an ATP-binding cassette (ABC) transporter that exports macrolides with 14- or 15- membered lactones. It forms an antibiotic efflux complex with MacA and TolC. macB corresponds to 1 locus in Pseudomonas aeruginosa PAO1 and 1 locus in Pseudomonas aeruginosa LESB58.	macrolide antibiotic	antibiotic efflux	36.8	98.3	1.7e-25	272
				gene0859	Chromosome	RP01	vatF	ARO:3003744	vatF is a streptogramin A acetyl transferase gene isolated from the chromosome of Yersinia enterocolitica.	streptogramin antibiotic	antibiotic inactivation	43.4	29.4	5.3e-06	104
				gene0894	Chromosome	RP01	oleD	ARO:3000865	OleD is a glycotransferase found in Streptomyces antibioticus, a natural producer of oleandomycin. OleD can glycosylate a wide range of macrolides. Unlike oleI, oleD is not found in the oleandomycin biosynthetic cluster.	macrolide antibiotic	antibiotic inactivation	26.9	92.4	3.1e-30	316
				gene0927	Chromosome	RP01	Bacillus subtilis mprF	ARO:3003324	MprF is a integral membrane protein that modifies the negatively-charged phosphatidylglycerol on the membrane surface. This confers resistance to cationic peptides that disrupt the cell membrane, including defensins. Additionally, large-scale mutations causing loss of function of the gene result in increased susceptibility to daptomycin.	peptide antibiotic	antibiotic target alteration	63.6	100	2.1999999999996E-312	2752
				gene0949	Chromosome	RP01	novA	ARO:3002522	A type III ABC transporter, identified on the novobiocin biosynthetic gene cluster, involved in the transport and resistance of novobiocin.	aminocoumarin antibiotic	antibiotic efflux	34	98.3	7.5e-94	866
				gene0950	Chromosome	RP01	tetA(58)	ARO:3003980	TetA(58) is a Tetracycline efflux pump described in Paenibacillus sp. LC231, a strain of Paenibacillus isolated from Lechuguilla Cave, NM, USA. Described by Pawlowski et al. 2016.	tetracycline antibiotic	antibiotic efflux	29.7	65	1.6e-16	197
				gene0951	Chromosome	RP01	macB	ARO:3000535	MacB is an ATP-binding cassette (ABC) transporter that exports macrolides with 14- or 15- membered lactones. It forms an antibiotic efflux complex with MacA and TolC. macB corresponds to 1 locus in Pseudomonas aeruginosa PAO1 and 1 locus in Pseudomonas aeruginosa LESB58.	macrolide antibiotic	antibiotic efflux	27.8	75.5	5.7e-19	218
				gene0996	Chromosome	RP01	macB	ARO:3000535	MacB is an ATP-binding cassette (ABC) transporter that exports macrolides with 14- or 15- membered lactones. It forms an antibiotic efflux complex with MacA and TolC. macB corresponds to 1 locus in Pseudomonas aeruginosa PAO1 and 1 locus in Pseudomonas aeruginosa LESB58.	macrolide antibiotic	antibiotic efflux	37.3	70.2	1.6e-27	291
				gene1003	Chromosome	RP01	oleC	ARO:3003748	oleC is an ABC transporter isolated from Streptomyces antibioticus and is involved in oleandomycin secretion.	macrolide antibiotic	antibiotic efflux	24.9	83.9	1.3e-18	214
				gene1020	Chromosome	RP01	lmrB	ARO:3002813	lmrB is a chromosomally-encoded efflux pump that confers resistance to lincosamides in Bacillus subtilis	lincosamide antibiotic	antibiotic efflux	40.8	82	1.9e-91	845
				gene1024	Chromosome	RP01	bcrA	ARO:3002987	bcrA is an ABC transporter found in Bacillus licheniformis that confers bacitracin resistance	peptide antibiotic	antibiotic efflux	40	96.7	2.1e-55	532
				gene1027	Chromosome	RP01	macB	ARO:3000535	MacB is an ATP-binding cassette (ABC) transporter that exports macrolides with 14- or 15- membered lactones. It forms an antibiotic efflux complex with MacA and TolC. macB corresponds to 1 locus in Pseudomonas aeruginosa PAO1 and 1 locus in Pseudomonas aeruginosa LESB58.	macrolide antibiotic	antibiotic efflux	33.8	67.3	8.6e-34	346
				gene1038	Chromosome	RP01	evgS	ARO:3000833	EvgS is a sensor protein that phosphorylates the regulatory protein EvgA. evgS corresponds to 1 locus in Pseudomonas aeruginosa PAO1 and 1 locus in Pseudomonas aeruginosa LESB58.	fluoroquinolone antibiotic;macrolide antibiotic;penam;tetracycline antibiotic	antibiotic efflux	26.4	38.2	1.5e-16	200
				gene1047	Chromosome	RP01	vmlR	ARO:3004476	vmlR is an ABC-F ATPase ribosomal protection protein identified in Bacillus subtilus. Shown to confer resistance to lincomycin and streptogramin A virginiamycin. Described by Crowe-McAuliffe et al. 2018.	lincosamide antibiotic;macrolide antibiotic;oxazolidinone antibiotic;phenicol antibiotic;pleuromutilin antibiotic;streptogramin antibiotic;tetracycline antibiotic	antibiotic target protection	38.3	70.7	4.1e-70	661
				gene1060	Chromosome	RP01	vanRF	ARO:3002925	vanRF is a vanR variant found in the vanF gene cluster	glycopeptide antibiotic	antibiotic target alteration	31.1	55.1	3.9e-11	149
				gene1078	Chromosome	RP01	ramA	ARO:3000823	RamA (resistance antibiotic multiple) is a positive regulator of AcrAB-TolC and leads to high level multidrug resistance in Klebsiella pneumoniae, Salmonella enterica, and Enterobacter aerugenes, increasing the expression of both the mar operon as well as AcrAB. RamA also decreases OmpF expression.	carbapenem;cephalosporin;cephamycin;fluoroquinolone antibiotic;glycylcycline;monobactam;penam;penem;phenicol antibiotic;rifamycin antibiotic;tetracycline antibiotic;triclosan	antibiotic efflux;reduced permeability to antibiotic	33	31.9	3.1e-11	151
				gene1114	Chromosome	RP01	tetA(60)	ARO:3004035	tetA(60) is a subunit of tetAB(60), an ABC transporter that confers resistance to tetracycline and tigercycline identified by screening a human saliva metagenomic library in Escherichia coli, which is required for resistance.	tetracycline antibiotic	antibiotic efflux	38.5	96.6	1.9e-116	1061
				gene1115	Chromosome	RP01	tetB(60)	ARO:3004036	tetB(60) is a subunit of tetAB(60), an ABC transporter that confers resistance to tetracycline and tigercycline identified by screening a human saliva metagenomic library in Escherichia coli, which is required for resistance.	tetracycline antibiotic	antibiotic efflux	45.4	78.1	1.6e-127	1157
				gene1120	Chromosome	RP01	msbA	ARO:3003950	MsbA is a multidrug resistance transporter homolog from E. coli and belongs to a superfamily of transporters that contain an adenosine triphosphate (ATP) binding cassette (ABC) which is also called a nucleotide-binding domain (NBD). MsbA is a member of the MDR-ABC transporter group by sequence homology. MsbA transports lipid A, a major component of the bacterial outer cell membrane, and is the on…	nitroimidazole antibiotic	antibiotic efflux	28.9	56.8	1.2e-20	233
				gene1137	Chromosome	RP01	bcrA	ARO:3002987	bcrA is an ABC transporter found in Bacillus licheniformis that confers bacitracin resistance	peptide antibiotic	antibiotic efflux	30.1	98.7	7.7e-34	346
				gene1153	Chromosome	RP01	bcrA	ARO:3002987	bcrA is an ABC transporter found in Bacillus licheniformis that confers bacitracin resistance	peptide antibiotic	antibiotic efflux	30.4	65.6	1.6e-27	292
				gene1217	Chromosome	RP01	tet(Z)	ARO:3000183	TetZ is a tetracycline efflux protein found in Gram-positive bacteria (Corynebacterium and Lactobacillus). It is associated with plasmid DNA.	tetracycline antibiotic	antibiotic efflux	33	25.8	1.4e-06	112
				gene1220	Chromosome	RP01	baeS	ARO:3000829	BaeS is a sensor kinase in the BaeSR regulatory system. While it phosphorylates BaeR to increase its activity, BaeS is not necessary for overexpressed BaeR to confer resistance.	aminocoumarin antibiotic;aminoglycoside antibiotic	antibiotic efflux	31.1	64.4	8.6e-37	373
				gene1221	Chromosome	RP01	vanRI	ARO:3003728	VanRI is the regulatory transcriptional activator in the VanSR regulator within the VanI glycopeptide resistance gene cluster.	glycopeptide antibiotic	antibiotic target alteration	38.7	96	1.4e-43	429
				gene1286	Chromosome	RP01	bacA	ARO:3002986	The bacA gene product (BacA) recycles undecaprenyl pyrophosphate during cell wall biosynthesis which confers resistance to bacitracin.	peptide antibiotic	antibiotic target alteration	29.7	98.9	1.7e-27	291
				gene1298	Chromosome	RP01	macB	ARO:3000535	MacB is an ATP-binding cassette (ABC) transporter that exports macrolides with 14- or 15- membered lactones. It forms an antibiotic efflux complex with MacA and TolC. macB corresponds to 1 locus in Pseudomonas aeruginosa PAO1 and 1 locus in Pseudomonas aeruginosa LESB58.	macrolide antibiotic	antibiotic efflux	31.1	73.1	3.9e-23	254
				gene1299	Chromosome	RP01	patA	ARO:3000024	PatA is an ABC transporter of Streptococcus pneumoniae that interacts with PatB to confer fluoroquinolone resistance.	fluoroquinolone antibiotic	antibiotic efflux	31.7	59.4	2e-17	205
				gene1309	Chromosome	RP01	macB	ARO:3000535	MacB is an ATP-binding cassette (ABC) transporter that exports macrolides with 14- or 15- membered lactones. It forms an antibiotic efflux complex with MacA and TolC. macB corresponds to 1 locus in Pseudomonas aeruginosa PAO1 and 1 locus in Pseudomonas aeruginosa LESB58.	macrolide antibiotic	antibiotic efflux	29.9	65.4	6.8e-21	235
				gene1310	Chromosome	RP01	efrA	ARO:3003948	efrA is a part of the EfrAB efflux pump, and both efrA and efrB are necessary to confer drug resistance.	fluoroquinolone antibiotic;macrolide antibiotic;rifamycin antibiotic	antibiotic efflux	31.2	76.5	1e-17	207
				gene1320	Chromosome	RP01	cpxA	ARO:3000830	CpxA is a membrane-localized sensor kinase that is activated by envelope stress. It starts a kinase cascade that activates CpxR, which promotes efflux complex expression.	aminocoumarin antibiotic;aminoglycoside antibiotic	antibiotic efflux	36.9	20.5	1.2e-09	139
				gene1370	Chromosome	RP01	ADC-23	ARO:3003867	ADC-23 is a beta-lactamase found in Acinetobacter pittii.	cephalosporin	antibiotic inactivation	25.9	45.5	5.7e-12	159
				gene1382	Chromosome	RP01	vatH	ARO:3002845	vatH is a plasmid-mediated acetyltransferase found in Enterococcus faecium	streptogramin antibiotic	antibiotic inactivation	46.6	44.8	1.9e-14	177
				gene1392	Chromosome	RP01	lmrB	ARO:3002813	lmrB is a chromosomally-encoded efflux pump that confers resistance to lincosamides in Bacillus subtilis	lincosamide antibiotic	antibiotic efflux	44.1	97.5	2.5e-103	947
				gene1446	Chromosome	RP01	evgA	ARO:3000832	EvgA, when phosphorylated, is a positive regulator for efflux protein complexes emrKY and mdtEF. While usually phosphorylated in a EvgS dependent manner, it can be phosphorylated in the absence of EvgS when overexpressed.	fluoroquinolone antibiotic;macrolide antibiotic;penam;tetracycline antibiotic	antibiotic efflux	21.1	29.3	8.8e-06	105
				gene1472	Chromosome	RP01	tetA(58)	ARO:3003980	TetA(58) is a Tetracycline efflux pump described in Paenibacillus sp. LC231, a strain of Paenibacillus isolated from Lechuguilla Cave, NM, USA. Described by Pawlowski et al. 2016.	tetracycline antibiotic	antibiotic efflux	27.1	72.9	4.3e-17	202
				gene1477	Chromosome	RP01	efrA	ARO:3003948	efrA is a part of the EfrAB efflux pump, and both efrA and efrB are necessary to confer drug resistance.	fluoroquinolone antibiotic;macrolide antibiotic;rifamycin antibiotic	antibiotic efflux	28.9	61.4	3.7e-16	194
				gene1487	Chromosome	RP01	ykkC	ARO:3003063	ykkC is an SMR-type protein that is a subunit of the ykkCD efflux pump	aminoglycoside antibiotic;phenicol antibiotic;tetracycline antibiotic	antibiotic efflux	71	98.2	1.1e-38	384
				gene1488	Chromosome	RP01	ykkD	ARO:3003064	ykkD is an SMR-type protein that is a subunit of the ykkCD efflux pump	aminoglycoside antibiotic;phenicol antibiotic;tetracycline antibiotic	antibiotic efflux	72.1	100	1.8e-38	382
				gene1521	Chromosome	RP01	mecA	ARO:3000617	A foreign PBP2a acquired by lateral gene transfer that able to perform peptidoglycan synthesis in the presence of beta-lactams.	carbapenem;cephalosporin;cephamycin;monobactam;penam	antibiotic target replacement	36.8	95.6	1.7e-118	1079
				gene1525	Chromosome	RP01	evgS	ARO:3000833	EvgS is a sensor protein that phosphorylates the regulatory protein EvgA. evgS corresponds to 1 locus in Pseudomonas aeruginosa PAO1 and 1 locus in Pseudomonas aeruginosa LESB58.	fluoroquinolone antibiotic;macrolide antibiotic;penam;tetracycline antibiotic	antibiotic efflux	26	48.1	5.2e-23	256
				gene1536	Chromosome	RP01	FosB	ARO:3000172	A thiol transferase that leads to the resistance of fosfomycin. Contrasting FosA, FosB is dependent on the cofactor Magnesium (II) and uses either bacillithiol or L-cysteine to open up the epoxide ring of fosfomycin.	fosfomycin	antibiotic inactivation	55.6	87.7	1.5e-41	410
				gene1572	Chromosome	RP01	rphB	ARO:3003992	rphB is a rifampin phosphotransferase protein found in Paenibacillus sp. LC231, a strain of Paenibacillus isolated from Lechuguilla Cave, NM, USA. Confers resistance to rifamycin antibiotics, specifically rifampin, through rifampin inactivation. Described by Pawlowski et al. 2016.	rifamycin antibiotic	antibiotic inactivation	44	8.7	2.6e-06	111
				gene1581	Chromosome	RP01	arlS	ARO:3000839	ArlS is a protein histidine kinase that phosphorylates ArlR, a promoter for norA expression.	acridine dye;fluoroquinolone antibiotic	antibiotic efflux	29.5	34.1	1.8e-18	216
				gene1586	Chromosome	RP01	evgS	ARO:3000833	EvgS is a sensor protein that phosphorylates the regulatory protein EvgA. evgS corresponds to 1 locus in Pseudomonas aeruginosa PAO1 and 1 locus in Pseudomonas aeruginosa LESB58.	fluoroquinolone antibiotic;macrolide antibiotic;penam;tetracycline antibiotic	antibiotic efflux	31.3	36.7	1.8e-06	110
				gene1604	Chromosome	RP01	VatI	ARO:3003987	Streptogramin A acetyltransferase found in Paenibacillus sp. LC231, isolated from Lechuguilla Cave, NM, USA. Confers resistance to streptogramin A antibiotics. Described by Pawlowski et al. 2016.	streptogramin antibiotic	antibiotic inactivation	45.2	30.9	8.8e-09	129
				gene1618	Chromosome	RP01	tetA(60)	ARO:3004035	tetA(60) is a subunit of tetAB(60), an ABC transporter that confers resistance to tetracycline and tigercycline identified by screening a human saliva metagenomic library in Escherichia coli, which is required for resistance.	tetracycline antibiotic	antibiotic efflux	32	95	1.7e-77	725
				gene1619	Chromosome	RP01	patB	ARO:3000025	PatB is an ABC transporter of Streptococcus pneumoniae that interacts with PatA to confer fluoroquinolone resistance..	fluoroquinolone antibiotic	antibiotic efflux	35.9	83.7	8.1e-83	771
				gene1622	Chromosome	RP01	macB	ARO:3000535	MacB is an ATP-binding cassette (ABC) transporter that exports macrolides with 14- or 15- membered lactones. It forms an antibiotic efflux complex with MacA and TolC. macB corresponds to 1 locus in Pseudomonas aeruginosa PAO1 and 1 locus in Pseudomonas aeruginosa LESB58.	macrolide antibiotic	antibiotic efflux	46.4	95.7	1.6e-55	532
				gene1623	Chromosome	RP01	macB	ARO:3000535	MacB is an ATP-binding cassette (ABC) transporter that exports macrolides with 14- or 15- membered lactones. It forms an antibiotic efflux complex with MacA and TolC. macB corresponds to 1 locus in Pseudomonas aeruginosa PAO1 and 1 locus in Pseudomonas aeruginosa LESB58.	macrolide antibiotic	antibiotic efflux	37	98.5	5.7e-61	581
				gene1630	Chromosome	RP01	optrA	ARO:3003746	OptrA is a member of the ABC-F protein subfamily that confers resistance to oxazolidinones. The gene encoding the protein was originally isolated from a plasmid in Enterococcus faecalis and Enterococcus faecium.	lincosamide antibiotic;macrolide antibiotic;oxazolidinone antibiotic;phenicol antibiotic;pleuromutilin antibiotic;streptogramin antibiotic;tetracycline antibiotic	antibiotic target protection	28.7	98	2.5e-67	637
				gene1636	Chromosome	RP01	evgS	ARO:3000833	EvgS is a sensor protein that phosphorylates the regulatory protein EvgA. evgS corresponds to 1 locus in Pseudomonas aeruginosa PAO1 and 1 locus in Pseudomonas aeruginosa LESB58.	fluoroquinolone antibiotic;macrolide antibiotic;penam;tetracycline antibiotic	antibiotic efflux	26.8	47	7.2e-20	227
				gene1662	Chromosome	RP01	tetT	ARO:3000193	Tet(T) is a ribosomal protection protein of streptococci. It is similar to Tet(Q).	tetracycline antibiotic	antibiotic target protection	44.3	22.5	1.4e-29	312
				gene1665	Chromosome	RP01	iri	ARO:3002884	iri is a monooxygenase that confers resistance to rifampin found in Rhodococcus hoagii	rifamycin antibiotic	antibiotic inactivation	40	98.4	9e-88	813
				gene1704	Chromosome	RP01	mecA	ARO:3000617	A foreign PBP2a acquired by lateral gene transfer that able to perform peptidoglycan synthesis in the presence of beta-lactams.	carbapenem;cephalosporin;cephamycin;monobactam;penam	antibiotic target replacement	25.5	79.2	1.4e-27	295
				gene1722	Chromosome	RP01	tetA(58)	ARO:3003980	TetA(58) is a Tetracycline efflux pump described in Paenibacillus sp. LC231, a strain of Paenibacillus isolated from Lechuguilla Cave, NM, USA. Described by Pawlowski et al. 2016.	tetracycline antibiotic	antibiotic efflux	28.8	79.2	6.8e-18	208
				gene1723	Chromosome	RP01	RlmA(II)	ARO:3001301	RlmA(II) is a methyltransferase found in Streptococcus pneumoniae and confers resistance to mycinamicin, tylosin and lincosamides. Specifically, this enzyme adds a methyl group to guanosine 748 (E. coli numbering) of 23S ribosomal RNA.	lincosamide antibiotic;macrolide antibiotic	antibiotic target alteration	33.4	98.3	1.7e-41	412
				gene1731	Chromosome	RP01	Staphylococcus mupA conferring resistance to mupirocin	ARO:3000521	An alternative isoleucyl-tRNA synthetase conferring resistance to mupirocin.	mupirocin	antibiotic target alteration	28.9	88.5	6.8e-105	963
				gene1764	Chromosome	RP01	clbC	ARO:3002816	clbC is a plasmid-encoded cfr gene found in Bacillus clausii	lincosamide antibiotic;phenicol antibiotic;pleuromutilin antibiotic;streptogramin antibiotic	antibiotic target alteration	37.2	93.6	1.9e-50	490
				gene1829	Chromosome	RP01	evgA	ARO:3000832	EvgA, when phosphorylated, is a positive regulator for efflux protein complexes emrKY and mdtEF. While usually phosphorylated in a EvgS dependent manner, it can be phosphorylated in the absence of EvgS when overexpressed.	fluoroquinolone antibiotic;macrolide antibiotic;penam;tetracycline antibiotic	antibiotic efflux	23.4	31.1	4.7e-06	107
				gene1909	Chromosome	RP01	tet(45)	ARO:3003196	tet45 is a tetracycline efflux pump found in Bhargavaea cecembensis strain previously isolated from a poultry-litter-impacted soil.	tetracycline antibiotic	antibiotic efflux	42.5	96.1	5.9e-102	935
				gene1914	Chromosome	RP01	gimA	ARO:3000463	A macrolide glycosyltransferase encoded by the gimA gene in Streptomyces ambofaciens, a natural producer of the macrolide antibiotic spiramycin. Chalcomycin, methymycin, tylosin, pikromycin, rosaramicin, oleandomycin, josamycin, and carbomycin are preferred substrates of gimA glycosyltransferase, while erythromycin and spiramycin have notably low binding affinities. GimA may be able to inactivate…	macrolide antibiotic	antibiotic inactivation	35.4	98.2	1.8e-59	568
				gene1924	Chromosome	RP01	Escherichia coli emrE	ARO:3004039	Member of the small MDR (multidrug resistance) family of transporters; in Escherichia coli this protein provides resistance against a number of positively charged compounds including ethidium bromide and erythromycin; proton-dependent secondary transporter which exchanges protons for compound translocation	macrolide antibiotic	antibiotic efflux	40.2	85.7	4.9e-16	189
				gene1925	Chromosome	RP01	abeS	ARO:3000768	AbeS in an efflux pump of the SMR family of transporters found in Acinetobacter baumannii.	aminocoumarin antibiotic;macrolide antibiotic	antibiotic efflux	42	95.2	1.9e-19	218
				gene1944	Chromosome	RP01	cmeR	ARO:3000526	CmeR is a repressor for the CmeABC multidrug efflux pump, binding to the cmeABC promoter region.	cephalosporin;fluoroquinolone antibiotic;fusidic acid;macrolide antibiotic	antibiotic efflux	46.2	25.1	6.5e-08	121
				gene2007	Chromosome	RP01	ykkD	ARO:3003064	ykkD is an SMR-type protein that is a subunit of the ykkCD efflux pump	aminoglycoside antibiotic;phenicol antibiotic;tetracycline antibiotic	antibiotic efflux	32.7	90.9	7.8e-08	118
				gene2008	Chromosome	RP01	qacH	ARO:3003836	qacH is a subunit of the qac multidrug efflux pump in Vibrio cholerae	fluoroquinolone antibiotic	antibiotic efflux	34.3	97.1	1.2e-13	168
				gene2052	Chromosome	RP01	Streptomyces rishiriensis parY mutant conferring resistance to aminocoumarin	ARO:3003318	point mutation on the Streptomyces rishiriensis parY resulting in aminocoumarin resistance	aminocoumarin antibiotic	antibiotic target alteration	41.6	95.4	5.1e-131	1187
				gene2058	Chromosome	RP01	otr(B)	ARO:3002892	otr(B) is a tetracycline resistance efflux pump found in Streptomyces rimosus	tetracycline antibiotic	antibiotic efflux	36.4	18.8	6.6e-08	124
				gene2111	Chromosome	RP01	bcrA	ARO:3002987	bcrA is an ABC transporter found in Bacillus licheniformis that confers bacitracin resistance	peptide antibiotic	antibiotic efflux	36.7	71.6	8.3e-33	337
				gene2136	Chromosome	RP01	tetA(58)	ARO:3003980	TetA(58) is a Tetracycline efflux pump described in Paenibacillus sp. LC231, a strain of Paenibacillus isolated from Lechuguilla Cave, NM, USA. Described by Pawlowski et al. 2016.	tetracycline antibiotic	antibiotic efflux	33	72	8.8e-12	153
				gene2137	Chromosome	RP01	bcrA	ARO:3002987	bcrA is an ABC transporter found in Bacillus licheniformis that confers bacitracin resistance	peptide antibiotic	antibiotic efflux	34	80.8	4.6e-14	172
				gene2179	Chromosome	RP01	efrA	ARO:3003948	efrA is a part of the EfrAB efflux pump, and both efrA and efrB are necessary to confer drug resistance.	fluoroquinolone antibiotic;macrolide antibiotic;rifamycin antibiotic	antibiotic efflux	44.7	99.1	9e-132	1193
				gene2180	Chromosome	RP01	patB	ARO:3000025	PatB is an ABC transporter of Streptococcus pneumoniae that interacts with PatA to confer fluoroquinolone resistance..	fluoroquinolone antibiotic	antibiotic efflux	36.9	94.9	1.3e-101	933
				gene2183	Chromosome	RP01	rphB	ARO:3003992	rphB is a rifampin phosphotransferase protein found in Paenibacillus sp. LC231, a strain of Paenibacillus isolated from Lechuguilla Cave, NM, USA. Confers resistance to rifamycin antibiotics, specifically rifampin, through rifampin inactivation. Described by Pawlowski et al. 2016.	rifamycin antibiotic	antibiotic inactivation	77.7	100	0	3523
				gene2184	Chromosome	RP01	lmrB	ARO:3002813	lmrB is a chromosomally-encoded efflux pump that confers resistance to lincosamides in Bacillus subtilis	lincosamide antibiotic	antibiotic efflux	48.5	97.7	7.9e-126	1141
				gene2187	Chromosome	RP01	otr(B)	ARO:3002892	otr(B) is a tetracycline resistance efflux pump found in Streptomyces rimosus	tetracycline antibiotic	antibiotic efflux	30.8	83	7.6e-58	555
				gene2193	Chromosome	RP01	vmlR	ARO:3004476	vmlR is an ABC-F ATPase ribosomal protection protein identified in Bacillus subtilus. Shown to confer resistance to lincomycin and streptogramin A virginiamycin. Described by Crowe-McAuliffe et al. 2018.	lincosamide antibiotic;macrolide antibiotic;oxazolidinone antibiotic;phenicol antibiotic;pleuromutilin antibiotic;streptogramin antibiotic;tetracycline antibiotic	antibiotic target protection	42.9	96	5.1e-111	1014
				gene2198	Chromosome	RP01	MexL	ARO:3003710	MexL is a specific repressor of mexJK transcription and autoregulates its own expression.	macrolide antibiotic;tetracycline antibiotic;triclosan	antibiotic efflux	30.4	66.8	4.5e-06	105
				gene2257	Chromosome	RP01	rphB	ARO:3003992	rphB is a rifampin phosphotransferase protein found in Paenibacillus sp. LC231, a strain of Paenibacillus isolated from Lechuguilla Cave, NM, USA. Confers resistance to rifamycin antibiotics, specifically rifampin, through rifampin inactivation. Described by Pawlowski et al. 2016.	rifamycin antibiotic	antibiotic inactivation	42.3	99.5	3.8e-206	1836
				gene2272	Chromosome	RP01	AAC(6')-Ib11	ARO:3002582	AAC(6')-Ib11 is an integron-encoded aminoglycoside acetyltransferase in S. enterica	aminoglycoside antibiotic	antibiotic inactivation	36.5	35.4	1.3e-07	118
				gene2285	Chromosome	RP01	PmpM	ARO:3004077	PmpM is a multidrug efflux pump belonging to the MATE family of Pseudomonas aeruginosa. PmpM is an H+ drug antiporter and is the first reported case of an H+ coupled efflux pump in the MATE family. PmpM confers resistance to fluoroquinolones, fradiomycin, benzalkonium chloride, chlorhexidine gluconate, ethidium bromide, tetraphenylphosphonium chloride (TPPCl), and rhodamine 6G.	aminoglycoside antibiotic;benzalkonium chloride;fluoroquinolone antibiotic	antibiotic efflux	36.2	97.6	1.3e-72	682
				gene2302	Chromosome	RP01	vanXYG	ARO:3003069	vanXYG is a vanXY variant found in the vanG gene cluster	glycopeptide antibiotic	antibiotic target alteration	35.8	67.8	1.7e-24	265
				gene2339	Chromosome	RP01	dfrG	ARO:3002868	dfrG is a plasmid-encoded dihydrofolate reductase found in Staphylococcus aureus	diaminopyrimidine antibiotic	antibiotic target replacement	50.6	98.8	4.6e-49	475
				gene2474	Chromosome	RP01	arlS	ARO:3000839	ArlS is a protein histidine kinase that phosphorylates ArlR, a promoter for norA expression.	acridine dye;fluoroquinolone antibiotic	antibiotic efflux	26.1	64.8	1.2e-25	277
				gene2475	Chromosome	RP01	mtrA	ARO:3000816	MtrA is a transcriptional activator of the MtrCDE multidrug efflux pump of Neisseria gonorrhoeae.	macrolide antibiotic;penam	antibiotic efflux	39.7	96.6	9.5e-48	465
				gene2476	Chromosome	RP01	baeS	ARO:3000829	BaeS is a sensor kinase in the BaeSR regulatory system. While it phosphorylates BaeR to increase its activity, BaeS is not necessary for overexpressed BaeR to confer resistance.	aminocoumarin antibiotic;aminoglycoside antibiotic	antibiotic efflux	33.8	37.8	1.9e-31	328
				gene2477	Chromosome	RP01	arlR	ARO:3000838	ArlR is a response regulator that binds to the norA promoter to activate expression. ArlR must first be phosphorylated by ArlS.	acridine dye;fluoroquinolone antibiotic	antibiotic efflux	41	94.6	3e-49	478
				gene2546	Chromosome	RP01	msbA	ARO:3003950	MsbA is a multidrug resistance transporter homolog from E. coli and belongs to a superfamily of transporters that contain an adenosine triphosphate (ATP) binding cassette (ABC) which is also called a nucleotide-binding domain (NBD). MsbA is a member of the MDR-ABC transporter group by sequence homology. MsbA transports lipid A, a major component of the bacterial outer cell membrane, and is the on…	nitroimidazole antibiotic	antibiotic efflux	29	78.5	2.4e-13	169
				gene2547	Chromosome	RP01	macB	ARO:3000535	MacB is an ATP-binding cassette (ABC) transporter that exports macrolides with 14- or 15- membered lactones. It forms an antibiotic efflux complex with MacA and TolC. macB corresponds to 1 locus in Pseudomonas aeruginosa PAO1 and 1 locus in Pseudomonas aeruginosa LESB58.	macrolide antibiotic	antibiotic efflux	29.1	88.5	3.6e-19	219
				gene2559	Chromosome	RP01	lsaC	ARO:3003112	LsaC is an ABC-F subfamily protein expressed in Streptococcus agalactiae. It confers resistance to lincomycin, clindamycin, dalfopristin, and tiamulin	lincosamide antibiotic;macrolide antibiotic;oxazolidinone antibiotic;phenicol antibiotic;pleuromutilin antibiotic;streptogramin antibiotic;tetracycline antibiotic	antibiotic target protection	28.9	86.8	5.9e-15	182
				gene2561	Chromosome	RP01	bcrC	ARO:3003250	The bcrC gene product (BcrC) is an undecaprenyl pyrophosphate phosphatase originally isolated from Bacillus subtilis. When overexpressed it can confer resistance to bacitracin.	peptide antibiotic	antibiotic target alteration	97.5	100	5.8e-110	1001
				gene2562	Chromosome	RP01	bcrB	ARO:3002988	bcrB is an ABC transporter found in Bacillus licheniformis that confers bacitracin resistance	peptide antibiotic	antibiotic efflux	98.6	85.2	1e-105	965
				gene2563	Chromosome	RP01	bcrA	ARO:3002987	bcrA is an ABC transporter found in Bacillus licheniformis that confers bacitracin resistance	peptide antibiotic	antibiotic efflux	99.3	100	4.4e-167	1495
				gene2564	Chromosome	RP01	vanSF	ARO:3002936	vanSF is a vanS variant found in the vanF gene cluster	glycopeptide antibiotic	antibiotic target alteration	29.3	89	1.4e-34	353
				gene2565	Chromosome	RP01	vanRF	ARO:3002925	vanRF is a vanR variant found in the vanF gene cluster	glycopeptide antibiotic	antibiotic target alteration	49.3	97.4	1.7e-60	575
				gene2599	Chromosome	RP01	macB	ARO:3000535	MacB is an ATP-binding cassette (ABC) transporter that exports macrolides with 14- or 15- membered lactones. It forms an antibiotic efflux complex with MacA and TolC. macB corresponds to 1 locus in Pseudomonas aeruginosa PAO1 and 1 locus in Pseudomonas aeruginosa LESB58.	macrolide antibiotic	antibiotic efflux	38.7	90.5	1e-36	370
				gene2618	Chromosome	RP01	vanRF	ARO:3002925	vanRF is a vanR variant found in the vanF gene cluster	glycopeptide antibiotic	antibiotic target alteration	31.1	44.7	2.1e-11	152
				gene2653	Chromosome	RP01	efrA	ARO:3003948	efrA is a part of the EfrAB efflux pump, and both efrA and efrB are necessary to confer drug resistance.	fluoroquinolone antibiotic;macrolide antibiotic;rifamycin antibiotic	antibiotic efflux	30.7	50.2	2.9e-23	256
				gene2697	Chromosome	RP01	bcrA	ARO:3002987	bcrA is an ABC transporter found in Bacillus licheniformis that confers bacitracin resistance	peptide antibiotic	antibiotic efflux	35.2	88.1	4.6e-34	347
				gene2702	Chromosome	RP01	lmrD	ARO:3002882	lmrD is a chromosomally-encoded efflux pump that confers resistance to lincosamides in Streptomyces lincolnensis and Lactococcus lactis. It can dimerize with lmrC	lincosamide antibiotic	antibiotic efflux	29	86.9	6e-19	217
				gene2703	Chromosome	RP01	patB	ARO:3000025	PatB is an ABC transporter of Streptococcus pneumoniae that interacts with PatA to confer fluoroquinolone resistance..	fluoroquinolone antibiotic	antibiotic efflux	28	77.8	1.7e-19	222
				gene2718	Chromosome	RP01	bcrA	ARO:3002987	bcrA is an ABC transporter found in Bacillus licheniformis that confers bacitracin resistance	peptide antibiotic	antibiotic efflux	31.9	81.6	9.4e-28	293
				gene2767	Chromosome	RP01	tetB(P)	ARO:3000195	TetB(P) is a tetracycline ribosomal protection protein found on the same operon as tetA(P), a tetracycline efflux protein.	tetracycline antibiotic	antibiotic target protection	35.6	23.9	2.9e-19	223
				gene2804	Chromosome	RP01	vanRA	ARO:3002919	vanRA, also known as vanR, is a vanR variant found in the vanA gene cluster	glycopeptide antibiotic	antibiotic target alteration	42.5	98.3	1.2e-50	490
				gene2847	Chromosome	RP01	ErmD	ARO:3000495	ErmD confers MLSb phenotype.	lincosamide antibiotic;macrolide antibiotic;streptogramin antibiotic	antibiotic target alteration	99.7	100	5.3e-165	1477
				gene2860	Chromosome	RP01	msbA	ARO:3003950	MsbA is a multidrug resistance transporter homolog from E. coli and belongs to a superfamily of transporters that contain an adenosine triphosphate (ATP) binding cassette (ABC) which is also called a nucleotide-binding domain (NBD). MsbA is a member of the MDR-ABC transporter group by sequence homology. MsbA transports lipid A, a major component of the bacterial outer cell membrane, and is the on…	nitroimidazole antibiotic	antibiotic efflux	29.4	78.7	1.4e-13	171
				gene2861	Chromosome	RP01	patA	ARO:3000024	PatA is an ABC transporter of Streptococcus pneumoniae that interacts with PatB to confer fluoroquinolone resistance.	fluoroquinolone antibiotic	antibiotic efflux	30.3	81.9	1.3e-17	206
				gene2863	Chromosome	RP01	cdeA	ARO:3003835	Clostridioides difficile and Escherichia coli multidrug efflux transporter with antiporter function. Confers resistance to fluoroquinolones in E. coli and acriflavin in Clostridioides difficile.	acridine dye;fluoroquinolone antibiotic	antibiotic efflux	30.3	93.6	3.8e-53	514
				gene2883	Chromosome	RP01	catV	ARO:3004357	A chloramphenicol acetyltransferase identified in Brevibacillus brevis and shown to confer resistance to chloramphenicol antibiotics. Described by Pawlowski et al. 2017.	phenicol antibiotic	antibiotic inactivation	56.5	99.5	2e-76	712
				gene2884	Chromosome	RP01	marA	ARO:3000263	In the presence of antibiotic stress, E. coli overexpresses the global activator protein MarA, which besides inducing MDR efflux pump AcrAB, also down- regulates synthesis of the porin OmpF.	carbapenem;cephalosporin;cephamycin;fluoroquinolone antibiotic;glycylcycline;monobactam;penam;penem;phenicol antibiotic;rifamycin antibiotic;tetracycline antibiotic;triclosan	antibiotic efflux;reduced permeability to antibiotic	30.8	48.9	1.3e-07	118
				gene2891	Chromosome	RP01	cmlv	ARO:3002700	cmlv is a chromosome-encoded chloramphenicol phoshotransferase that is found in Streptomyces venezuelae	phenicol antibiotic	antibiotic inactivation	36.8	92.4	1.6e-50	491
				gene2992	Chromosome	RP01	Staphylococcus mupB conferring resistance to mupirocin	ARO:3000510	An alternative isoleucyl-tRNA synthetase conferring resistance to mupirocin.	mupirocin	antibiotic target alteration	26.9	45.6	6.4e-36	368
				gene3096	Chromosome	RP01	baeS	ARO:3000829	BaeS is a sensor kinase in the BaeSR regulatory system. While it phosphorylates BaeR to increase its activity, BaeS is not necessary for overexpressed BaeR to confer resistance.	aminocoumarin antibiotic;aminoglycoside antibiotic	antibiotic efflux	33	38.6	2.2e-29	310
				gene3097	Chromosome	RP01	mtrA	ARO:3000816	MtrA is a transcriptional activator of the MtrCDE multidrug efflux pump of Neisseria gonorrhoeae.	macrolide antibiotic;penam	antibiotic efflux	45.3	98.3	1e-49	482
				gene3184	Chromosome	RP01	bcrA	ARO:3002987	bcrA is an ABC transporter found in Bacillus licheniformis that confers bacitracin resistance	peptide antibiotic	antibiotic efflux	30.5	84.7	1.6e-23	256
				gene3208	Chromosome	RP01	Staphylococcus mupA conferring resistance to mupirocin	ARO:3000521	An alternative isoleucyl-tRNA synthetase conferring resistance to mupirocin.	mupirocin	antibiotic target alteration	25.7	25.6	5e-11	153
				gene3214	Chromosome	RP01	macB	ARO:3000535	MacB is an ATP-binding cassette (ABC) transporter that exports macrolides with 14- or 15- membered lactones. It forms an antibiotic efflux complex with MacA and TolC. macB corresponds to 1 locus in Pseudomonas aeruginosa PAO1 and 1 locus in Pseudomonas aeruginosa LESB58.	macrolide antibiotic	antibiotic efflux	43.9	95.3	1.6e-47	463
				gene3216	Chromosome	RP01	bcrA	ARO:3002987	bcrA is an ABC transporter found in Bacillus licheniformis that confers bacitracin resistance	peptide antibiotic	antibiotic efflux	26.1	73.6	8.1e-20	225
				gene3234	Chromosome	RP01	macB	ARO:3000535	MacB is an ATP-binding cassette (ABC) transporter that exports macrolides with 14- or 15- membered lactones. It forms an antibiotic efflux complex with MacA and TolC. macB corresponds to 1 locus in Pseudomonas aeruginosa PAO1 and 1 locus in Pseudomonas aeruginosa LESB58.	macrolide antibiotic	antibiotic efflux	30.7	81.1	6.8e-23	251
				gene3308	Chromosome	RP01	vanTE	ARO:3002971	vanTE is a vanT variant found in the vanE gene cluster	glycopeptide antibiotic	antibiotic target alteration	32	92.4	4.5e-42	418
				gene3327	Chromosome	RP01	bacA	ARO:3002986	The bacA gene product (BacA) recycles undecaprenyl pyrophosphate during cell wall biosynthesis which confers resistance to bacitracin.	peptide antibiotic	antibiotic target alteration	46.7	97.8	9.5e-63	595
				gene3368	Chromosome	RP01	vanRF	ARO:3002925	vanRF is a vanR variant found in the vanF gene cluster	glycopeptide antibiotic	antibiotic target alteration	33.3	44.7	1.4e-09	136
				gene3443	Chromosome	RP01	vanHB	ARO:3002943	vanHB is a vanH variant in the vanB gene cluster	glycopeptide antibiotic	antibiotic target alteration	30.3	73.1	1.8e-25	274
				gene3465	Chromosome	RP01	blt	ARO:3003006	blt is an MFS efflux pump that confers resistance to multiple drugs such as rhodamine and acridine dyes, and fluoroquinolone antibiotics	acridine dye;fluoroquinolone antibiotic	antibiotic efflux	43.6	96.7	5.9e-90	831
				gene3481	Chromosome	RP01	lmrD	ARO:3002882	lmrD is a chromosomally-encoded efflux pump that confers resistance to lincosamides in Streptomyces lincolnensis and Lactococcus lactis. It can dimerize with lmrC	lincosamide antibiotic	antibiotic efflux	27.6	86.2	6.3e-16	191
				gene3486	Chromosome	RP01	macB	ARO:3000535	MacB is an ATP-binding cassette (ABC) transporter that exports macrolides with 14- or 15- membered lactones. It forms an antibiotic efflux complex with MacA and TolC. macB corresponds to 1 locus in Pseudomonas aeruginosa PAO1 and 1 locus in Pseudomonas aeruginosa LESB58.	macrolide antibiotic	antibiotic efflux	34.1	65.1	1e-34	354
				gene3502	Chromosome	RP01	YojI	ARO:3003952	YojI mediates resistance to the peptide antibiotic microcin J25 when it is expressed from a multicopy vector. YojI is capable of pumping out microcin molecules. The outer membrane protein TolC in addition to YojI is required for export of microcin J25 out of the cell. Microcin J25 is thus the first known substrate for YojI.	peptide antibiotic	antibiotic efflux	30.9	66.5	1e-13	172
				gene3512	Chromosome	RP01	vanRM	ARO:3002928	vanRM is a vanR variant found in the vanM gene cluster	glycopeptide antibiotic	antibiotic target alteration	40	96.4	5e-38	381
				gene3513	Chromosome	RP01	baeS	ARO:3000829	BaeS is a sensor kinase in the BaeSR regulatory system. While it phosphorylates BaeR to increase its activity, BaeS is not necessary for overexpressed BaeR to confer resistance.	aminocoumarin antibiotic;aminoglycoside antibiotic	antibiotic efflux	25	62.7	4.2e-20	229
				gene3537	Chromosome	RP01	tetA(60)	ARO:3004035	tetA(60) is a subunit of tetAB(60), an ABC transporter that confers resistance to tetracycline and tigercycline identified by screening a human saliva metagenomic library in Escherichia coli, which is required for resistance.	tetracycline antibiotic	antibiotic efflux	29.4	50.6	4.9e-18	211
				gene3551	Chromosome	RP01	vanSE	ARO:3002935	vanSE is a vanS variant found in the vanE gene cluster	glycopeptide antibiotic	antibiotic target alteration	25	38.3	4.9e-16	195
				gene3552	Chromosome	RP01	vanRF	ARO:3002925	vanRF is a vanR variant found in the vanF gene cluster	glycopeptide antibiotic	antibiotic target alteration	40.7	95.5	3.1e-49	478
				gene3553	Chromosome	RP01	msbA	ARO:3003950	MsbA is a multidrug resistance transporter homolog from E. coli and belongs to a superfamily of transporters that contain an adenosine triphosphate (ATP) binding cassette (ABC) which is also called a nucleotide-binding domain (NBD). MsbA is a member of the MDR-ABC transporter group by sequence homology. MsbA transports lipid A, a major component of the bacterial outer cell membrane, and is the on…	nitroimidazole antibiotic	antibiotic efflux	27.1	77.8	1.2e-17	206
				gene3559	Chromosome	RP01	Staphylococcus aureus LmrS	ARO:3004572	MFS transporters are secondary active transporters with single-polypeptide chains containing 400-600 amino acids that transport small solutes across the membrane by using electrochemical gradients. LmrS has 14 transmembrane helices and, when expressed in E. coli, is capable of extruding a variety of antibiotics inclinding linezolid, trimethoprim, florfenicol, chlorampheniocol, erythromycin, strep…	aminoglycoside antibiotic;diaminopyrimidine antibiotic;macrolide antibiotic;oxazolidinone antibiotic;phenicol antibiotic	antibiotic efflux	43.2	95.2	2.9e-99	912
				gene3578	Chromosome	RP01	oleC	ARO:3003748	oleC is an ABC transporter isolated from Streptomyces antibioticus and is involved in oleandomycin secretion.	macrolide antibiotic	antibiotic efflux	26.8	88.7	3.1e-20	228
				gene3634	Chromosome	RP01	tetB(60)	ARO:3004036	tetB(60) is a subunit of tetAB(60), an ABC transporter that confers resistance to tetracycline and tigercycline identified by screening a human saliva metagenomic library in Escherichia coli, which is required for resistance.	tetracycline antibiotic	antibiotic efflux	29.6	59.1	2.4e-24	265
				gene3653	Chromosome	RP01	bcrA	ARO:3002987	bcrA is an ABC transporter found in Bacillus licheniformis that confers bacitracin resistance	peptide antibiotic	antibiotic efflux	33.9	97.1	2.2e-44	437
				gene3681	Chromosome	RP01	vanHB	ARO:3002943	vanHB is a vanH variant in the vanB gene cluster	glycopeptide antibiotic	antibiotic target alteration	32.3	74.4	1.9e-30	317
				gene3723	Chromosome	RP01	vatB	ARO:3002841	vatB is a plasmid-mediated acetyltransferase found in Staphylococcus aureus	streptogramin antibiotic	antibiotic inactivation	50	34.9	3e-14	175
				gene3729	Chromosome	RP01	emrY	ARO:3000254	emrY is a multidrug transport that moves substrates across the inner membrane of the Gram-negative E. coli. It is a homolog of emrB.	tetracycline antibiotic	antibiotic efflux	28.7	59.3	2.1e-26	284
				gene3737	Chromosome	RP01	lmrC	ARO:3002881	lmrC is an ABC-F subfamily protein that confers resistance to lincosamides in Streptomyces lincolnensis and Lactococcus lactis. It can dimerize with lmrD	lincosamide antibiotic;macrolide antibiotic;oxazolidinone antibiotic;phenicol antibiotic;pleuromutilin antibiotic;streptogramin antibiotic;tetracycline antibiotic	antibiotic target protection	31.5	9.3	5.7e-06	110
				gene3747	Chromosome	RP01	macB	ARO:3000535	MacB is an ATP-binding cassette (ABC) transporter that exports macrolides with 14- or 15- membered lactones. It forms an antibiotic efflux complex with MacA and TolC. macB corresponds to 1 locus in Pseudomonas aeruginosa PAO1 and 1 locus in Pseudomonas aeruginosa LESB58.	macrolide antibiotic	antibiotic efflux	34.7	96.9	6.1e-31	320
				gene3772	Chromosome	RP01	vanRM	ARO:3002928	vanRM is a vanR variant found in the vanM gene cluster	glycopeptide antibiotic	antibiotic target alteration	22.4	96.5	8e-07	112
				gene3799	Chromosome	RP01	bcrA	ARO:3002987	bcrA is an ABC transporter found in Bacillus licheniformis that confers bacitracin resistance	peptide antibiotic	antibiotic efflux	28.6	42.1	2.6e-16	197
				gene3831	Chromosome	RP01	patA	ARO:3000024	PatA is an ABC transporter of Streptococcus pneumoniae that interacts with PatB to confer fluoroquinolone resistance.	fluoroquinolone antibiotic	antibiotic efflux	25.4	58.8	6.3e-17	202
				gene3871	Chromosome	RP01	blt	ARO:3003006	blt is an MFS efflux pump that confers resistance to multiple drugs such as rhodamine and acridine dyes, and fluoroquinolone antibiotics	acridine dye;fluoroquinolone antibiotic	antibiotic efflux	21.8	94.2	1e-09	139
				gene3913	Chromosome	RP01	Chlamydia trachomatis intrinsic murA conferring resistance to fosfomycin	ARO:3003785	Chlamydia murA confers intrinsic resistance to fosfomycin. The presence of an aspartic acid residue in place of the critical cysteine at position 119 that enables fosfomycin binding is believed to be responsible for this intrinsic resistance.	fosfomycin	antibiotic target alteration	34.3	95	1.8e-60	577
				gene3949	Chromosome	RP01	Chlamydia trachomatis intrinsic murA conferring resistance to fosfomycin	ARO:3003785	Chlamydia murA confers intrinsic resistance to fosfomycin. The presence of an aspartic acid residue in place of the critical cysteine at position 119 that enables fosfomycin binding is believed to be responsible for this intrinsic resistance.	fosfomycin	antibiotic target alteration	34.5	96.3	1.9e-57	551
				gene3952	Chromosome	RP01	evgS	ARO:3000833	EvgS is a sensor protein that phosphorylates the regulatory protein EvgA. evgS corresponds to 1 locus in Pseudomonas aeruginosa PAO1 and 1 locus in Pseudomonas aeruginosa LESB58.	fluoroquinolone antibiotic;macrolide antibiotic;penam;tetracycline antibiotic	antibiotic efflux	29.9	86.3	1.4e-10	142
				gene3978	Chromosome	RP01	iri	ARO:3002884	iri is a monooxygenase that confers resistance to rifampin found in Rhodococcus hoagii	rifamycin antibiotic	antibiotic inactivation	25.2	39.7	8.2e-07	114
				gene3993	Chromosome	RP01	tetA(58)	ARO:3003980	TetA(58) is a Tetracycline efflux pump described in Paenibacillus sp. LC231, a strain of Paenibacillus isolated from Lechuguilla Cave, NM, USA. Described by Pawlowski et al. 2016.	tetracycline antibiotic	antibiotic efflux	34.2	99	7e-54	519
				gene4020	Chromosome	RP01	novA	ARO:3002522	A type III ABC transporter, identified on the novobiocin biosynthetic gene cluster, involved in the transport and resistance of novobiocin.	aminocoumarin antibiotic	antibiotic efflux	31.2	50.5	1.4e-31	329
				gene4021	Chromosome	RP01	novA	ARO:3002522	A type III ABC transporter, identified on the novobiocin biosynthetic gene cluster, involved in the transport and resistance of novobiocin.	aminocoumarin antibiotic	antibiotic efflux	38.2	34.7	4.4e-42	420
				gene4049	Chromosome	RP01	vanHD	ARO:3002944	vanHD is a vanH variant in the vanD gene cluster	glycopeptide antibiotic	antibiotic target alteration	31.4	67	7.1e-22	243
				gene4054	Chromosome	RP01	vanRF	ARO:3002925	vanRF is a vanR variant found in the vanF gene cluster	glycopeptide antibiotic	antibiotic target alteration	27.2	58.2	2.2e-11	151
				gene4086	Chromosome	RP01	novA	ARO:3002522	A type III ABC transporter, identified on the novobiocin biosynthetic gene cluster, involved in the transport and resistance of novobiocin.	aminocoumarin antibiotic	antibiotic efflux	33.2	98.9	1.1e-84	787
				gene4092	Chromosome	RP01	bcrA	ARO:3002987	bcrA is an ABC transporter found in Bacillus licheniformis that confers bacitracin resistance	peptide antibiotic	antibiotic efflux	32.2	99.7	4.3e-37	374
				gene4105	Chromosome	RP01	novA	ARO:3002522	A type III ABC transporter, identified on the novobiocin biosynthetic gene cluster, involved in the transport and resistance of novobiocin.	aminocoumarin antibiotic	antibiotic efflux	28.9	95.7	3.7e-56	541
				gene4106	Chromosome	RP01	msbA	ARO:3003950	MsbA is a multidrug resistance transporter homolog from E. coli and belongs to a superfamily of transporters that contain an adenosine triphosphate (ATP) binding cassette (ABC) which is also called a nucleotide-binding domain (NBD). MsbA is a member of the MDR-ABC transporter group by sequence homology. MsbA transports lipid A, a major component of the bacterial outer cell membrane, and is the on…	nitroimidazole antibiotic	antibiotic efflux	28	73.3	3.5e-43	429
				gene4112	Chromosome	RP01	tet(35)	ARO:3000481	Tet35 is a tetracycline efflux pump found in the Gram-negative Vibrio and Stenotrophomonas. It is unrelated to other tet resistance genes.	tetracycline antibiotic	antibiotic efflux	30.8	37.6	4.6e-09	134
				gene4167	Chromosome	RP01	msbA	ARO:3003950	MsbA is a multidrug resistance transporter homolog from E. coli and belongs to a superfamily of transporters that contain an adenosine triphosphate (ATP) binding cassette (ABC) which is also called a nucleotide-binding domain (NBD). MsbA is a member of the MDR-ABC transporter group by sequence homology. MsbA transports lipid A, a major component of the bacterial outer cell membrane, and is the on…	nitroimidazole antibiotic	antibiotic efflux	26.3	47	2.8e-18	214
				gene4176	Chromosome	RP01	macB	ARO:3000535	MacB is an ATP-binding cassette (ABC) transporter that exports macrolides with 14- or 15- membered lactones. It forms an antibiotic efflux complex with MacA and TolC. macB corresponds to 1 locus in Pseudomonas aeruginosa PAO1 and 1 locus in Pseudomonas aeruginosa LESB58.	macrolide antibiotic	antibiotic efflux	40.5	89.7	2.1e-48	471
				gene4178	Chromosome	RP01	smeR	ARO:3003066	smeR is the responder component of a two component signal transduction system that includes smeS	aminoglycoside antibiotic;cephalosporin;cephamycin;penam	antibiotic efflux	32.1	96.5	7.9e-31	319
				gene4200	Chromosome	RP01	vanF	ARO:3002908	VanF is a D-Ala-D-Ala ligase homolog that can synthesize D-Ala-D-Lac, an alternative substrate for peptidoglycan synthesis that reduces vancomycin binding affinity. It is associated with both vancomycin and teicoplanin resistance in Paenibacillus popilliae	glycopeptide antibiotic	antibiotic target alteration	26.4	44.7	1.9e-09	137
				gene4217	Chromosome	RP01	optrA	ARO:3003746	OptrA is a member of the ABC-F protein subfamily that confers resistance to oxazolidinones. The gene encoding the protein was originally isolated from a plasmid in Enterococcus faecalis and Enterococcus faecium.	lincosamide antibiotic;macrolide antibiotic;oxazolidinone antibiotic;phenicol antibiotic;pleuromutilin antibiotic;streptogramin antibiotic;tetracycline antibiotic	antibiotic target protection	32	94.3	2e-74	698
				gene4229	Chromosome	RP01	novA	ARO:3002522	A type III ABC transporter, identified on the novobiocin biosynthetic gene cluster, involved in the transport and resistance of novobiocin.	aminocoumarin antibiotic	antibiotic efflux	27	78.3	7.2e-17	199
				gene4231	Chromosome	RP01	vanRM	ARO:3002928	vanRM is a vanR variant found in the vanM gene cluster	glycopeptide antibiotic	antibiotic target alteration	34.1	94.9	1.9e-35	359
				gene4268	Chromosome	RP01	tetA(58)	ARO:3003980	TetA(58) is a Tetracycline efflux pump described in Paenibacillus sp. LC231, a strain of Paenibacillus isolated from Lechuguilla Cave, NM, USA. Described by Pawlowski et al. 2016.	tetracycline antibiotic	antibiotic efflux	31.6	97.3	1.1e-37	379
				gene4284	Chromosome	RP01	arlS	ARO:3000839	ArlS is a protein histidine kinase that phosphorylates ArlR, a promoter for norA expression.	acridine dye;fluoroquinolone antibiotic	antibiotic efflux	32.7	42.8	2.2e-35	362
				gene4285	Chromosome	RP01	vanRI	ARO:3003728	VanRI is the regulatory transcriptional activator in the VanSR regulator within the VanI glycopeptide resistance gene cluster.	glycopeptide antibiotic	antibiotic target alteration	45.2	96.6	7.6e-53	509
