# Supplementary material for: Bacillus paralicheniformis RP01 Enhances the Expression of Growth-Related Genes in Cotton and Promotes Plant Growth by Altering Microbiota inside and outside the Root
Source: Int J Mol Sci. 2023 Apr 13;24(8):7227. doi: 10.3390/ijms24087227 (PMC10138817; doi:10.3390/ijms24087227)
Supplement: Supplementary file 1 [file ijms-24-07227-s001.zip › Supplementary file Table S9.xlsx]

## Sheet: Supplementary file Table S9
Table S9: The homologous genes and unique genes in the genome of RP01 compared with the other three strains.
(A.) The homologous genes in the genome of the four strains.											(B.)The unique genes in the genome of RP01 compared with the other three strains.
Cluster ID	Gene No.	COG ID	COG Description	KO ID	KO Description						Cluster ID	Gene No.	COG ID	COG Description	KO ID	KO Description
CLUSTER1	24	COG5632	N-acetylmuramoyl-L-alanine amidase CwlA	K01447	N-acetylmuramoyl-L-alanine amidase [EC:3.5.1.28]						CLUSTER4084	2	-	-	-	-
CLUSTER2	17	COG0840	Methyl-accepting chemotaxis protein (MCP)	K03406	methyl-accepting chemotaxis protein						CLUSTER4570	1	-	-	-	-
CLUSTER3	16	COG3666;COG1028	Transposase, IS1182 family;NAD(P)-dependent dehydrogenase, short-chain alcohol dehydrogenase family	K00059	3-oxoacyl-[acyl-carrier protein] reductase [EC:1.1.1.100]						CLUSTER4571	1	COG0492	Thioredoxin reductase	-	-
CLUSTER4	16	COG5811;COG5814	Sporulation sigma factor SigE (mother cell-specific, SpoIIGB);Sporulation sigma factor SigK (mother cell-specific, SpoIIIC/SpoIVCB)	K03091	RNA polymerase sporulation-specific sigma factor						CLUSTER4572	1	-	-	-	-
CLUSTER5	16	COG1253	Hemolysin-related protein, contains CBS domains, UPF0053 family	-	-						CLUSTER4573	1	-	-	-	-
CLUSTER6	16	COG5444	Predicted ribonuclease, toxin component of the YeeF-YezG toxin-antitoxin module	K21493;K21487	toxin YxiD [EC:3.1.-.-];toxin YobL [EC:3.1.-.-]						CLUSTER4574	1	-	-	-	-
CLUSTER7	15	-	-	K21488	antitoxin YobK						CLUSTER4575	1	-	-	-	-
CLUSTER8	15	COG1020	EntF, seryl-AMP synthase component of non-ribosomal peptide synthetase	K15667;K15666;K15664	plipastatin/fengycin lipopeptide synthetase D;plipastatin/fengycin lipopeptide synthetase C;plipastatin/fengycin lipopeptide synthetase A						CLUSTER4576	1	-	-	-	-
CLUSTER9	14	COG5444	Predicted ribonuclease, toxin component of the YeeF-YezG toxin-antitoxin module	K21493	toxin YxiD [EC:3.1.-.-]						CLUSTER4577	1	-	-	-	-
CLUSTER10	13	COG5852	Small acid-soluble spore protein SspA/SspB/SspC/SspD (alpha/beta-type)	K06419;K06421;K06420	small acid-soluble spore protein B (major beta-type SASP);small acid-soluble spore protein D (minor alpha/beta-type SASP);small acid-soluble spore protein C (minor alpha/beta-type SASP)						CLUSTER4578	1	-	-	-	-
CLUSTER11	12	COG2814	Predicted arabinose efflux permease AraJ, MFS family	K08217	MFS transporter, DHA3 family, macrolide efflux protein						CLUSTER4579	1	-	-	-	-
CLUSTER12	12	COG1077	Cell shape-determining ATPase MreB, actin-like superfamily	K03569	rod shape-determining protein MreB and related proteins						CLUSTER4580	1	-	-	-	-
CLUSTER13	12	COG1960	Acyl-CoA dehydrogenase related to the alkylation response protein AidB	K00248;K18244	butyryl-CoA dehydrogenase [EC:1.3.8.1];acyl-CoA dehydrogenase [EC:1.3.99.-]						CLUSTER4581	1	-	-	-	-
CLUSTER14	12	COG1028	NAD(P)-dependent dehydrogenase, short-chain alcohol dehydrogenase family	-	-						CLUSTER4582	1	-	-	-	-
CLUSTER15	12	COG0591	Na+/proline symporter	K11928;K03307	sodium/proline symporter;solute:Na+ symporter, SSS family						CLUSTER4583	1	COG0732	Restriction endonuclease S subunit	K01154	type I restriction enzyme, S subunit [EC:3.1.21.3]
CLUSTER16	12	COG5902	Spore germination receptor GerABC, GerB subunit (amino acid transporter)	K06311	spore germination protein						CLUSTER4584	1	-	-	-	-
CLUSTER17	12	COG0444;COG1123	ABC-type dipeptide/oligopeptide/nickel transport system, ATPase component;ABC-type glutathione transport system ATPase component, contains duplicated ATPase domain	K02032;K10823	peptide/nickel transport system ATP-binding protein;oligopeptide transport system ATP-binding protein						CLUSTER4585	1	-	-	K07800	AgrD protein
CLUSTER18	12	COG1087	UDP-glucose 4-epimerase	K01784	UDP-glucose 4-epimerase [EC:5.1.3.2]						CLUSTER4586	1	-	-	-	-
CLUSTER19	12	COG1278	Cold shock protein, CspA family	K03704	cold shock protein						CLUSTER4587	1	-	-	-	-
CLUSTER20	11	COG1486	Alpha-galactosidase/6-phospho-beta-glucosidase, family 4 of glycosyl hydrolase	K01222	6-phospho-beta-glucosidase [EC:3.2.1.86]						CLUSTER4588	1	-	-	-	-
CLUSTER21	11	COG5444	Predicted ribonuclease, toxin component of the YeeF-YezG toxin-antitoxin module	K21493	toxin YxiD [EC:3.1.-.-]						CLUSTER4589	1	-	-	-	-
CLUSTER22	10	COG1210	UTP-glucose-1-phosphate uridylyltransferase	K00963	UTP--glucose-1-phosphate uridylyltransferase [EC:2.7.7.9]						CLUSTER4590	1	-	-	-	-
CLUSTER23	10	COG0457	Tetratricopeptide (TPR) repeat	K06368	response regulator aspartate phosphatase J [EC:3.1.-.-]						CLUSTER4591	1	-	-	-	-
CLUSTER24	9	-	-	-	-						CLUSTER4592	1	-	-	-	-
CLUSTER25	9	-	-	-	-						CLUSTER4593	1	-	-	-	-
CLUSTER26	9	COG0833	Amino acid permease	K16236;K02205	histidine permease;arginine/ornithine permease						CLUSTER4594	1	-	-	-	-
CLUSTER27	9	COG0168	Trk-type K+ transport system, membrane component	K03498	trk/ktr system potassium uptake protein						CLUSTER4595	1	-	-	K06354	phosphatase RapE regulator
CLUSTER28	9	COG5153	Putative lipase ATG15 (essential for vacuolar disintegration of autophagic bodies)	-	-						CLUSTER4596	1	-	-	-	-
CLUSTER29	9	COG2140	Oxalate decarboxylase/archaeal phosphoglucose isomerase, cupin superfamily	K01569	oxalate decarboxylase [EC:4.1.1.2]						CLUSTER4597	1	-	-	-	-
CLUSTER30	9	COG5879	Spore coat protein CotD	K06327	spore coat protein D						CLUSTER4598	1	-	-	-	-
CLUSTER31	9	COG1331	Uncharacterized conserved protein YyaL, SSP411 family, contains thoiredoxin and six-hairpin glycosidase-like domains	K06888	uncharacterized protein						CLUSTER4599	1	COG1995	4-hydroxy-L-threonine phosphate dehydrogenase PdxA	-	-
CLUSTER32	8	-	-	-	-						CLUSTER4600	1	COG2265	tRNA/tmRNA/rRNA uracil-C5-methylase, TrmA/RlmC/RlmD family	-	-
CLUSTER33	8	COG0569	Trk/Ktr K+ transport system regulatory component TrkA/KtrA/KtrC, RCK domain	K03499	trk/ktr system potassium uptake protein						CLUSTER4601	1	-	-	-	-
CLUSTER34	8	COG0306	Phosphate/sulfate permease	K16331	sulfate permease						CLUSTER4602	1	-	-	-	-
CLUSTER35	8	COG0395	ABC-type glycerol-3-phosphate transport system, permease component	K17320	putative aldouronate transport system permease protein						CLUSTER4603	1	-	-	-	-
CLUSTER36	8	COG1995	4-hydroxy-L-threonine phosphate dehydrogenase PdxA	K22024	4-phospho-D-threonate 3-dehydrogenase / 4-phospho-D-erythronate 3-dehydrogenase [EC:1.1.1.408 1.1.1.409]						CLUSTER4604	1	-	-	-	-
CLUSTER37	8	-	-	-	-						CLUSTER4605	1	-	-	-	-
CLUSTER38	8	COG2160	L-arabinose isomerase	K01804	L-arabinose isomerase [EC:5.3.1.4]						CLUSTER4606	1	-	-	-	-
CLUSTER39	8	COG0010	Arginase/agmatinase family enzyme	K01476	arginase [EC:3.5.3.1]						CLUSTER4607	1	-	-	-	-
CLUSTER40	8	-	-	-	-						CLUSTER4608	1	-	-	-	-
CLUSTER41	8	COG1506	Dipeptidyl aminopeptidase/acylaminoacyl peptidase	-	-						CLUSTER4609	1	-	-	-	-
CLUSTER42	8	COG1115	Na+/alanine symporter	K11626;K03310	putative sodium/glutamine symporter;alanine or glycine:cation symporter, AGCS family						CLUSTER4610	1	-	-	-	-
CLUSTER43	8	COG1267	Phosphatidylglycerophosphatase A	-	-						CLUSTER4611	1	-	-	-	-
CLUSTER44	8	COG5813;COG5812	Sporulation sigma factor SigG (forespore-specific, SpoIIIG);Sporulation sigma factor SigF (forespore-specific, SpoIIAC)	K03091	RNA polymerase sporulation-specific sigma factor						CLUSTER4612	1	-	-	-	-
CLUSTER45	8	COG1173	ABC-type dipeptide/oligopeptide/nickel transport system, permease component	K15582;K16201	oligopeptide transport system permease protein;dipeptide transport system permease protein						CLUSTER4613	1	-	-	-	-
CLUSTER46	8	COG0614	ABC-type Fe3+-hydroxamate transport system, periplasmic component	K25109	iron-siderophore transport system substrate-binding protein						CLUSTER4614	1	-	-	-	-
CLUSTER47	8	COG0745	DNA-binding response regulator, OmpR family, contains REC and winged-helix (wHTH) domain	K07658;K07668	two-component system, OmpR family, alkaline phosphatase synthesis response regulator PhoP;two-component system, OmpR family, response regulator VicR						CLUSTER4615	1	-	-	-	-
CLUSTER48	8	COG2310	Stress response protein SCP2	K05795	tellurium resistance protein TerD						CLUSTER4616	1	-	-	-	-
CLUSTER49	8	COG1404	Serine protease, subtilisin family	K17734;K13276	serine protease AprX [EC:3.4.21.-];bacillopeptidase F [EC:3.4.21.-]						CLUSTER4617	1	-	-	-	-
CLUSTER50	8	COG1979	Alcohol dehydrogenase YqhD, Fe-dependent ADH family	K19955	alcohol dehydrogenase [EC:1.1.1.-]						CLUSTER4618	1	-	-	-	-
CLUSTER51	8	COG0542	ATP-dependent Clp protease, ATP-binding subunit ClpA	K03696;K03697	ATP-dependent Clp protease ATP-binding subunit ClpC;ATP-dependent Clp protease ATP-binding subunit ClpE						CLUSTER4619	1	-	-	-	-
CLUSTER52	8	COG0235	5-methylthioribulose/5-deoxyribulose/Fuculose 1-phosphate aldolase (methionine salvage, sugar degradation)	K03077	L-ribulose-5-phosphate 4-epimerase [EC:5.1.3.4]						CLUSTER4620	1	-	-	-	-
CLUSTER53	8	COG0843	Heme/copper-type cytochrome/quinol oxidase, subunit 1	K02274;K02827	cytochrome c oxidase subunit I [EC:7.1.1.9];cytochrome aa3-600 menaquinol oxidase subunit I [EC:7.1.1.5]						CLUSTER4621	1	COG4495	Uncharacterized conserved protein, DUF4176 domain	-	-
CLUSTER54	8	COG1733	DNA-binding transcriptional regulator, HxlR family	-	-						CLUSTER4622	1	COG1959	DNA-binding transcriptional regulator, IscR family	-	-
CLUSTER55	8	COG1733	DNA-binding transcriptional regulator, HxlR family	-	-						CLUSTER4623	1	-	-	-	-
CLUSTER56	8	COG1363	Putative aminopeptidase FrvX	-	-						CLUSTER4624	1	-	-	-	-
CLUSTER57	8	COG0014	Gamma-glutamyl phosphate reductase	K00147	glutamate-5-semialdehyde dehydrogenase [EC:1.2.1.41]						CLUSTER4625	1	COG0286	Type I restriction-modification system, DNA methylase subunit	K03427	type I restriction enzyme M protein [EC:2.1.1.72]
CLUSTER58	8	COG0772	Peptodoglycan polymerase FtsW/RodA/SpoVE	K05837	rod shape determining protein RodA						CLUSTER4626	1	-	-	-	-
CLUSTER59	8	COG1175	ABC-type sugar transport system, permease component	K15771	arabinogalactan oligomer / maltooligosaccharide transport system permease protein						CLUSTER4627	1	-	-	-	-
CLUSTER60	8	COG1012	Acyl-CoA reductase or other NAD-dependent aldehyde dehydrogenase	K00140	malonate-semialdehyde dehydrogenase (acetylating) / methylmalonate-semialdehyde dehydrogenase [EC:1.2.1.18 1.2.1.27]						CLUSTER4628	1	COG4096	Type I site-specific restriction endonuclease, part of a restriction-modification system	K01153	type I restriction enzyme, R subunit [EC:3.1.21.3]
CLUSTER61	8	-	-	-	-						CLUSTER4629	1	-	-	-	-
CLUSTER62	8	COG0022	Pyruvate/2-oxoglutarate/acetoin dehydrogenase complex, dehydrogenase (E1) component, beta subunit	K00162;K00167	pyruvate dehydrogenase E1 component beta subunit [EC:1.2.4.1];2-oxoisovalerate dehydrogenase E1 component beta subunit [EC:1.2.4.4]						CLUSTER4630	1	-	-	-	-
CLUSTER63	8	COG0187	DNA gyrase/topoisomerase IV, subunit B	K02470;K02622	DNA gyrase subunit B [EC:5.6.2.2];topoisomerase IV subunit B [EC:5.6.2.2]						CLUSTER4631	1	COG4974	Site-specific recombinase XerD	K04763	integrase/recombinase XerD
CLUSTER64	8	COG0318	O-succinylbenzoic acid-CoA ligase MenE or related acyl-CoA synthetase (AMP-forming)	K00666	fatty-acyl-CoA synthase [EC:6.2.1.-]						CLUSTER4632	1	-	-	-	-
CLUSTER65	8	COG0523	Zinc metallochaperone YeiR/ZagA and related GTPases, G3E family	-	-						CLUSTER4633	1	COG0861	Tellurite resistance membrane protein TerC	-	-
CLUSTER66	8	COG0281	Malic enzyme	K00027	malate dehydrogenase (oxaloacetate-decarboxylating) [EC:1.1.1.38]						CLUSTER4634	1	-	-	-	-
CLUSTER67	8	COG2755	Lysophospholipase L1 or related esterase. Includes spore coat protein LipC/YcsK	-	-						CLUSTER4635	1	-	-	-	-
CLUSTER68	8	-	-	-	-						CLUSTER4636	1	-	-	-	-
CLUSTER69	8	COG1440	Phosphotransferase system cellobiose-specific component IIB	K02760	cellobiose PTS system EIIB component [EC:2.7.1.196 2.7.1.205]						CLUSTER4637	1	-	-	-	-
CLUSTER70	8	COG3584;COG1388	3D (Asp-Asp-Asp) domain, usually in lytic transglycosylases;LysM repeat	K22409	N-acetylmuramoyl-L-alanine amidase [EC:3.5.1.28]						CLUSTER4638	1	-	-	-	-
CLUSTER71	8	COG1368	Phosphoglycerol transferase MdoB/OpgB, AlkP superfamily	K19005	lipoteichoic acid synthase [EC:2.7.8.20]						CLUSTER4639	1	-	-	-	-
CLUSTER72	8	COG1368	Phosphoglycerol transferase MdoB/OpgB, AlkP superfamily	K19005	lipoteichoic acid synthase [EC:2.7.8.20]						CLUSTER4640	1	-	-	-	-
CLUSTER73	8	COG1126	ABC-type polar amino acid transport system, ATPase component	K10010;K23060	L-cystine transport system ATP-binding protein [EC:7.4.2.1];arginine/lysine/histidine transport system ATP-binding protein [EC:7.4.2.1]						CLUSTER4641	1	-	-	-	-
CLUSTER74	8	COG2055	Malate/lactate/ureidoglycolate dehydrogenase, LDH2 family	K00073	ureidoglycolate dehydrogenase (NAD+) [EC:1.1.1.350]						CLUSTER4642	1	-	-	-	-
CLUSTER75	8	COG0601	ABC-type dipeptide/oligopeptide/nickel transport system, permease component	K15581;K16200	oligopeptide transport system permease protein;dipeptide transport system permease protein						CLUSTER4643	1	-	-	-	-
CLUSTER76	8	COG2002	Bifunctional DNA-binding transcriptional regulator of stationary/sporulation/toxin gene expression and antitoxin component of the YhaV-PrlF toxin-antitoxin module	K06284	AbrB family transcriptional regulator, transcriptional pleiotropic regulator of transition state genes						CLUSTER4644	1	-	-	-	-
CLUSTER77	8	COG0860	N-acetylmuramoyl-L-alanine amidase	K01448	N-acetylmuramoyl-L-alanine amidase [EC:3.5.1.28]						CLUSTER4645	1	-	-	-	-
CLUSTER78	8	COG0686	Alanine dehydrogenase (includes sporulation protein SpoVN)	K00259	alanine dehydrogenase [EC:1.4.1.1]						CLUSTER4646	1	-	-	-	-
CLUSTER79	8	COG1312	D-mannonate dehydratase	K01686	mannonate dehydratase [EC:4.2.1.8]						CLUSTER4647	1	-	-	-	-
CLUSTER80	8	COG0766	UDP-N-acetylglucosamine enolpyruvyl transferase	K00790	UDP-N-acetylglucosamine 1-carboxyvinyltransferase [EC:2.5.1.7]						CLUSTER4648	1	COG0542	ATP-dependent Clp protease, ATP-binding subunit ClpA	-	-
CLUSTER81	8	COG0267	Ribosomal protein L33	K02913	large subunit ribosomal protein L33						CLUSTER4649	1	-	-	-	-
CLUSTER82	8	COG1113	L-asparagine transporter or related permease	K11737	D-serine/D-alanine/glycine transporter						CLUSTER4650	1	-	-	-	-
CLUSTER83	8	COG3711	Transcriptional antiterminator	K03488	beta-glucoside operon transcriptional antiterminator						CLUSTER4651	1	-	-	-	-
CLUSTER84	8	COG1396	Transcriptional regulator, contains XRE-family HTH domain	K22299	HTH-type transcriptional regulator, competence development regulator						CLUSTER4652	1	-	-	-	-
CLUSTER85	8	COG1131	ABC-type multidrug transport system, ATPase component	K01990	ABC-2 type transport system ATP-binding protein						CLUSTER4653	1	-	-	-	-
CLUSTER86	8	COG0574	Phosphoenolpyruvate synthase/pyruvate phosphate dikinase	K22579	rifampicin phosphotransferase [EC:2.7.9.6]						CLUSTER4654	1	COG0694	Fe-S cluster biogenesis protein NfuA, 4Fe-4S-binding domain	-	-
CLUSTER87	8	COG0073;COG0072	tRNA-binding EMAP/Myf domain;Phenylalanyl-tRNA synthetase beta subunit	K01890;K06878	phenylalanyl-tRNA synthetase beta chain [EC:6.1.1.20];tRNA-binding protein						CLUSTER4655	1	-	-	-	-
CLUSTER88	8	COG3383	Predicted molibdopterin-dependent oxidoreductase YjgC	K00123	formate dehydrogenase major subunit [EC:1.17.1.9]						CLUSTER4656	1	-	-	-	-
CLUSTER89	8	COG0276	Protoheme ferro-lyase (ferrochelatase)	K01772	protoporphyrin/coproporphyrin ferrochelatase [EC:4.99.1.1 4.99.1.9]						CLUSTER4927	1	-	-	-	-
CLUSTER90	8	COG2204;COG4753	DNA-binding transcriptional response regulator, NtrC family, contains REC, AAA-type ATPase, and a Fis-type DNA-binding domains;Two-component response regulator, YesN/AraC family, consists of REC and AraC-type DNA-binding domains	K03413	two-component system, chemotaxis family, chemotaxis protein CheY						CLUSTER4928	1	-	-	-	-
CLUSTER91	8	COG1482	Mannose-6-phosphate isomerase, class I	K01809	mannose-6-phosphate isomerase [EC:5.3.1.8]						CLUSTER4929	1	-	-	-	-
CLUSTER92	8	COG1027	Aspartate ammonia-lyase	K01744	aspartate ammonia-lyase [EC:4.3.1.1]
CLUSTER93	8	COG1263	Phosphotransferase system IIC components, glucose/maltose/N-acetylglucosamine-specific	K02810	sucrose PTS system EIIBCA or EIIBC component [EC:2.7.1.211]
CLUSTER94	8	COG3394	Chitooligosaccharide deacetylase ChbG, YdjC/CelG family	K03478	chitin disaccharide deacetylase [EC:3.5.1.105]
CLUSTER95	8	COG3239	Fatty acid desaturase	K10255	acyl-lipid omega-6 desaturase (Delta-12 desaturase) [EC:1.14.19.23 1.14.19.45]
CLUSTER96	8	COG0274	Deoxyribose-phosphate aldolase	K01619	deoxyribose-phosphate aldolase [EC:4.1.2.4]
CLUSTER97	8	COG1846	DNA-binding transcriptional regulator, MarR family	K15973	MarR family transcriptional regulator, 2-MHQ and catechol-resistance regulon repressor
CLUSTER98	8	COG3546	Mn-containing catalase (includes spore coat protein CotJC)	K07217	Mn-containing catalase
CLUSTER99	8	COG0366	Glycosidase/amylase (phosphorylase)	K01182;K01226	oligo-1,6-glucosidase [EC:3.2.1.10];trehalose-6-phosphate hydrolase [EC:3.2.1.93]
CLUSTER100	8	COG0329	4-hydroxy-tetrahydrodipicolinate synthase/N-acetylneuraminate lyase	K01714	4-hydroxy-tetrahydrodipicolinate synthase [EC:4.3.3.7]
CLUSTER101	8	COG0175	3'-phosphoadenosine 5'-phosphosulfate sulfotransferase (PAPS reductase)/FAD synthetase or related enzyme	K00390	phosphoadenosine phosphosulfate reductase [EC:1.8.4.8 1.8.4.10]
CLUSTER102	8	COG0626	Cystathionine beta-lyase/cystathionine gamma-synthase	K01760;K17217	cysteine-S-conjugate beta-lyase [EC:4.4.1.13];cystathionine gamma-lyase / homocysteine desulfhydrase [EC:4.4.1.1 4.4.1.2]
CLUSTER103	8	COG0288	Carbonic anhydrase	K01673	carbonic anhydrase [EC:4.2.1.1]
CLUSTER104	8	COG1674	DNA segregation ATPase FtsK/SpoIIIE or related protein	K03466	DNA segregation ATPase FtsK/SpoIIIE, S-DNA-T family
CLUSTER105	8	COG0458	Carbamoylphosphate synthase large subunit	K01955	carbamoyl-phosphate synthase large subunit [EC:6.3.5.5]
CLUSTER106	8	COG0057	Glyceraldehyde-3-phosphate dehydrogenase/erythrose-4-phosphate dehydrogenase	K00134	glyceraldehyde 3-phosphate dehydrogenase (phosphorylating) [EC:1.2.1.12]
CLUSTER107	8	COG0476	Molybdopterin or thiamine biosynthesis adenylyltransferase	K03148;K21029	sulfur carrier protein ThiS adenylyltransferase [EC:2.7.7.73];molybdopterin-synthase adenylyltransferase [EC:2.7.7.80]
CLUSTER108	8	COG1764	Organic hydroperoxide reductase OsmC/OhrA	K04063	lipoyl-dependent peroxiredoxin [EC:1.11.1.28]
CLUSTER109	8	COG3507	Beta-xylosidase	K06113	arabinan endo-1,5-alpha-L-arabinosidase [EC:3.2.1.99]
CLUSTER110	8	COG3401	Fibronectin type 3 domain	K18197;K18198	rhamnogalacturonan endolyase [EC:4.2.2.23];rhamnogalacturonan exolyase [EC:4.2.2.24]
CLUSTER111	8	COG4770	Acetyl/propionyl-CoA carboxylase, alpha subunit	K01961	acetyl-CoA carboxylase, biotin carboxylase subunit [EC:6.4.1.2 6.3.4.14]
CLUSTER112	8	COG0444	ABC-type dipeptide/oligopeptide/nickel transport system, ATPase component	K15583;K16202	oligopeptide transport system ATP-binding protein;dipeptide transport system ATP-binding protein
CLUSTER113	8	COG1098	Predicted RNA-binding protein, contains ribosomal protein S1 (RPS1) domain	K07571;K07570	S1 RNA binding domain protein;general stress protein 13
CLUSTER114	8	COG0785	Cytochrome c biogenesis protein CcdA	K06196	cytochrome c-type biogenesis protein
CLUSTER115	8	COG1115	Na+/alanine symporter	K03310	alanine or glycine:cation symporter, AGCS family
CLUSTER116	8	COG0031	Cysteine synthase	K01738	cysteine synthase [EC:2.5.1.47]
CLUSTER117	8	COG2814	Predicted arabinose efflux permease AraJ, MFS family	-	-
CLUSTER118	8	COG1733	DNA-binding transcriptional regulator, HxlR family	-	-
CLUSTER119	8	COG4195	Phage-related replication protein YjqB, UPF0714/DUF867 family	-	-
CLUSTER120	8	COG4209	ABC-type polysaccharide transport system, permease component	K17319	putative aldouronate transport system permease protein
CLUSTER121	8	COG1117	ABC-type phosphate transport system, ATPase component	K02036	phosphate transport system ATP-binding protein [EC:7.3.2.1]
CLUSTER122	8	COG0701	Uncharacterized membrane protein YraQ, UPF0718 family	K07089	uncharacterized protein
CLUSTER123	8	COG2258	N-hydroxylaminopurine reductase YiiM, contains MOSC domain	-	-
CLUSTER124	8	-	-	-	-
CLUSTER125	8	COG0199	Ribosomal protein S14	K02954	small subunit ribosomal protein S14
CLUSTER126	8	COG1454	Alcohol dehydrogenase, class IV	K19954	alcohol dehydrogenase [EC:1.1.1.-]
CLUSTER127	8	COG1028	NAD(P)-dependent dehydrogenase, short-chain alcohol dehydrogenase family	K00034	glucose 1-dehydrogenase [EC:1.1.1.47]
CLUSTER128	8	COG5899	Spore coat protein YwqH	-	-
CLUSTER129	8	COG0488	ATPase components of ABC transporters with duplicated ATPase domains	-	-
CLUSTER130	8	COG0174	Glutamine synthetase	K01915	glutamine synthetase [EC:6.3.1.2]
CLUSTER131	8	-	-	-	-
CLUSTER132	8	COG0860;COG2247	N-acetylmuramoyl-L-alanine amidase;Putative cell wall-binding domain (amidase enhancer), LytB superfamily	K01448	N-acetylmuramoyl-L-alanine amidase [EC:3.5.1.28]
CLUSTER133	8	COG0444	ABC-type dipeptide/oligopeptide/nickel transport system, ATPase component	K02031	peptide/nickel transport system ATP-binding protein
CLUSTER134	8	COG0425;COG0607	Sulfur carrier protein TusA (tRNA thiolation, molybdenum cofactor biosynthesis);Rhodanese-related sulfurtransferase	K04085	tRNA 2-thiouridine synthesizing protein A [EC:2.8.1.-]
CLUSTER135	8	COG1028	NAD(P)-dependent dehydrogenase, short-chain alcohol dehydrogenase family	-	-
CLUSTER136	8	COG1653	ABC-type glycerol-3-phosphate transport system, periplasmic component	K17318	putative aldouronate transport system substrate-binding protein
CLUSTER137	8	COG0007;COG1587	Uroporphyrinogen-III methylase (siroheme synthase);Uroporphyrinogen-III synthase	K13542;K02303	uroporphyrinogen III methyltransferase / synthase [EC:2.1.1.107 4.2.1.75];uroporphyrin-III C-methyltransferase [EC:2.1.1.107]
CLUSTER138	8	COG1845	Heme/copper-type cytochrome/quinol oxidase, subunit 3	K02276;K02828	cytochrome c oxidase subunit III [EC:7.1.1.9];cytochrome aa3-600 menaquinol oxidase subunit III [EC:7.1.1.5]
CLUSTER139	8	COG2197	DNA-binding response regulator, NarL/FixJ family, contains REC and HTH domains	K07693;K02479	two-component system, NarL family, response regulator DesR;two-component system, NarL family, response regulator
CLUSTER140	8	-	-	-	-
CLUSTER141	8	COG0265	Periplasmic serine protease, S1-C subfamily, contain C-terminal PDZ domain	K04771	serine protease Do [EC:3.4.21.107]
CLUSTER142	8	COG0740	ATP-dependent protease ClpP, protease subunit	K01358	ATP-dependent Clp protease, protease subunit [EC:3.4.21.92]
CLUSTER143	8	COG0656	Aldo/keto reductase, related to diketogulonate reductase	K23257	methylglyoxal/glyoxal reductase [EC:1.1.1.283 1.1.1.-]
CLUSTER144	8	COG1120	ABC-type cobalamin/Fe3+-siderophores transport system, ATPase component	K25130;K02013	iron-siderophore transport system ATP-binding protein [EC:7.2.2.-];iron complex transport system ATP-binding protein [EC:7.2.2.-]
CLUSTER145	8	COG0191	Fructose/tagatose bisphosphate aldolase	K01624;K03339	fructose-bisphosphate aldolase, class II [EC:4.1.2.13];6-phospho-5-dehydro-2-deoxy-D-gluconate aldolase [EC:4.1.2.29]
CLUSTER146	8	COG2723	Beta-glucosidase/6-phospho-beta-glucosidase/beta-galactosidase	K01223	6-phospho-beta-glucosidase [EC:3.2.1.86]
CLUSTER147	8	COG1167	DNA-binding transcriptional regulator, MocR family, contains an aminotransferase domain	K18907	GntR family transcriptional regulator, regulator for abcA and norABC
CLUSTER148	8	COG0629	Single-stranded DNA-binding protein	K03111	single-strand DNA-binding protein
CLUSTER149	8	COG0753	Catalase	K03781	catalase [EC:1.11.1.6]
CLUSTER150	8	COG1447	Phosphotransferase system cellobiose-specific component IIA	K02759	cellobiose PTS system EIIA component [EC:2.7.1.196 2.7.1.205]
CLUSTER151	8	COG0362	6-phosphogluconate dehydrogenase	K00033	6-phosphogluconate dehydrogenase [EC:1.1.1.44 1.1.1.343]
CLUSTER152	8	COG1473	Metal-dependent amidase/aminoacylase/carboxypeptidase	K01436	amidohydrolase [EC:3.5.1.-]
CLUSTER153	8	COG1173	ABC-type dipeptide/oligopeptide/nickel transport system, permease component	K02034	peptide/nickel transport system permease protein
CLUSTER154	8	COG0733	Na+-dependent transporter, SNF family	K03308	neurotransmitter:Na+ symporter, NSS family
CLUSTER155	8	COG5850	Prespore-specific transcriptional regulator RsfA	K06314	prespore-specific regulator
CLUSTER156	8	COG1874	Beta-galactosidase GanA	K12308	beta-galactosidase [EC:3.2.1.23]
CLUSTER157	8	-	-	-	-
CLUSTER158	8	COG5888	Spore coat protein CotY/CotZ (outer spore coat)	K06344;K06343	spore coat protein Z;spore coat protein Y
CLUSTER159	7	COG0209	Ribonucleotide reductase alpha subunit	K00525	ribonucleoside-diphosphate reductase alpha chain [EC:1.17.4.1]
CLUSTER160	7	COG5013	Nitrate reductase alpha subunit	K00370	nitrate reductase / nitrite oxidoreductase, alpha subunit [EC:1.7.5.1 1.7.99.-]
CLUSTER161	7	COG2223	Nitrate/nitrite transporter NarK	K02575	MFS transporter, NNP family, nitrate/nitrite transporter
CLUSTER162	7	COG2931	Ca2+-binding protein, RTX toxin-related	-	-
CLUSTER163	7	COG1055	Na+/H+ antiporter NhaD or related arsenite permease	K03893	arsenical pump membrane protein
CLUSTER164	7	COG0640	DNA-binding transcriptional regulator, ArsR family	-	-
CLUSTER165	7	COG0642	Signal transduction histidine kinase	K19694	two-component system, sensor histidine kinase ChiS
CLUSTER166	7	-	-	-	-
CLUSTER167	7	COG0457	Tetratricopeptide (TPR) repeat	K06367	response regulator aspartate phosphatase I [EC:3.1.-.-]
CLUSTER168	7	COG1140	Nitrate reductase beta subunit	K00371	nitrate reductase / nitrite oxidoreductase, beta subunit [EC:1.7.5.1 1.7.99.-]
CLUSTER169	7	-	-	-	-
CLUSTER170	7	COG3634	Alkyl hydroperoxide reductase subunit AhpF	K03387	NADH-dependent peroxiredoxin subunit F [EC:1.8.1.-]
CLUSTER171	6	COG0652	Peptidyl-prolyl cis-trans isomerase (rotamase) - cyclophilin family	K03768	peptidyl-prolyl cis-trans isomerase B (cyclophilin B) [EC:5.2.1.8]
CLUSTER172	6	COG0457	Tetratricopeptide (TPR) repeat	K06367	response regulator aspartate phosphatase I [EC:3.1.-.-]
CLUSTER173	6	COG1509	L-lysine 2,3-aminomutase (EF-P beta-lysylation pathway)	K01843	lysine 2,3-aminomutase [EC:5.4.3.2]
CLUSTER174	6	COG1167	DNA-binding transcriptional regulator, MocR family, contains an aminotransferase domain	K00375	GntR family transcriptional regulator / MocR family aminotransferase
CLUSTER175	6	-	-	-	-
CLUSTER176	6	COG1633	Rubrerythrin, includes spore coat protein YhjR	-	-
CLUSTER177	6	COG1131	ABC-type multidrug transport system, ATPase component	K20490	lantibiotic transport system ATP-binding protein
CLUSTER178	6	COG0208	Ribonucleotide reductase beta subunit, ferritin-like domain	K00526	ribonucleoside-diphosphate reductase beta chain [EC:1.17.4.1]
CLUSTER180	6	COG2002	Bifunctional DNA-binding transcriptional regulator of stationary/sporulation/toxin gene expression and antitoxin component of the YhaV-PrlF toxin-antitoxin module	K06284	AbrB family transcriptional regulator, transcriptional pleiotropic regulator of transition state genes
CLUSTER181	6	-	-	-	-
CLUSTER182	6	-	-	-	-
CLUSTER183	6	COG0745	DNA-binding response regulator, OmpR family, contains REC and winged-helix (wHTH) domain	K11634	two-component system, OmpR family, response regulator YxdJ
CLUSTER184	6	COG0640	DNA-binding transcriptional regulator, ArsR family	K03892	ArsR family transcriptional regulator, arsenate/arsenite/antimonite-responsive transcriptional repressor
CLUSTER185	6	-	-	-	-
CLUSTER186	6	COG2801	Transposase InsO and inactivated derivatives	K07483	transposase
CLUSTER187	6	COG0394	Protein-tyrosine-phosphatase	K03741	arsenate reductase (thioredoxin) [EC:1.20.4.4]
CLUSTER188	6	COG0252	L-asparaginase/archaeal Glu-tRNAGln amidotransferase subunit D	K01424	L-asparaginase [EC:3.5.1.1]
CLUSTER189	6	COG0741;COG0739	Soluble lytic murein transglycosylase or regulatory protein s ( may contain LysM/invasin domain);Murein DD-endopeptidase MepM and murein hydrolase activator NlpD, contains LysM domain	-	-
CLUSTER190	6	COG0745	DNA-binding response regulator, OmpR family, contains REC and winged-helix (wHTH) domain	K20488	two-component system, OmpR family, lantibiotic biosynthesis response regulator NisR/SpaR
CLUSTER191	6	COG1136	ABC-type lipoprotein export system, ATPase component	K11635	putative ABC transport system ATP-binding protein
CLUSTER192	6	COG4166	ABC-type oligopeptide transport system, periplasmic component	K15580	oligopeptide transport system substrate-binding protein
CLUSTER193	6	COG0381	UDP-N-acetylglucosamine 2-epimerase	K01791	UDP-N-acetylglucosamine 2-epimerase (non-hydrolysing) [EC:5.1.3.14]
CLUSTER194	5	-	-	-	-
CLUSTER195	5	COG0338	DNA-adenine methylase	-	-
CLUSTER196	5	COG1172	Ribose/xylose/arabinose/galactoside ABC-type transport system, permease component	K10440;K10550	ribose transport system permease protein;D-allose transport system permease protein
CLUSTER197	5	COG1680	CubicO group peptidase, beta-lactamase class C family	-	-
CLUSTER198	5	-	-	-	-
CLUSTER199	5	COG0330	Regulator of protease activity HflC, stomatin/prohibitin superfamily	-	-
CLUSTER200	5	-	-	-	-
CLUSTER201	5	COG4379	Mu-like prophage tail protein gpP	-	-
CLUSTER202	5	COG2730	Aryl-phospho-beta-D-glucosidase BglC, GH1 family	K01179	endoglucanase [EC:3.2.1.4]
CLUSTER203	5	COG0615	Glycerol-3-phosphate cytidylyltransferase, cytidylyltransferase family	K00980	glycerol-3-phosphate cytidylyltransferase [EC:2.7.7.39]
CLUSTER204	5	-	-	-	-
CLUSTER205	5	COG1780	Flavodoxin NrdI, NrdF-interacting activator of class Ib ribonucleotide reductase	K03647	protein involved in ribonucleotide reduction
CLUSTER207	5	COG5444;COG3210	Predicted ribonuclease, toxin component of the YeeF-YezG toxin-antitoxin module;Large exoprotein involved in heme utilization or adhesion	K21493	toxin YxiD [EC:3.1.-.-]
CLUSTER208	5	-	-	-	-
CLUSTER209	5	-	-	-	-
CLUSTER210	5	-	-	-	-
CLUSTER211	5	-	-	-	-
CLUSTER212	5	COG0776	Bacterial nucleoid DNA-binding protein IHF-alpha	K03530	DNA-binding protein HU-beta
CLUSTER213	5	COG0367	Asparagine synthetase B (glutamine-hydrolyzing)	K01953	asparagine synthase (glutamine-hydrolysing) [EC:6.3.5.4]
CLUSTER214	5	COG1066	DNA repair protein RadA/Sms, contains AAA+ ATPase domain	K04485	DNA repair protein RadA/Sms
CLUSTER216	5	-	-	-	-
CLUSTER217	5	-	-	-	-
CLUSTER218	5	COG0780	NADPH-dependent 7-cyano-7-deazaguanine reductase QueF, C-terminal domain, T-fold superfamily	K09457	7-cyano-7-deazaguanine reductase [EC:1.7.1.13]
CLUSTER219	5	COG3764	Sortase (surface protein transpeptidase)	K07284	sortase A [EC:3.4.22.70]
CLUSTER220	5	COG1020	EntF, seryl-AMP synthase component of non-ribosomal peptide synthetase	K16120	lichenysin synthetase B
CLUSTER221	5	-	-	-	-
CLUSTER222	5	COG2732	Barstar, RNAse (barnase) inhibitor	K03623	ribonuclease inhibitor
CLUSTER223	5	COG1682	ABC-type polysaccharide/teichoic acid/polyol phosphate export permease	K09692	teichoic acid transport system permease protein
CLUSTER224	5	-	-	-	-
CLUSTER225	5	-	-	-	-
CLUSTER226	5	COG0673	Predicted dehydrogenase	K13020	UDP-N-acetyl-2-amino-2-deoxyglucuronate dehydrogenase [EC:1.1.1.335]
CLUSTER227	5	COG0513	Superfamily II DNA and RNA helicase	K05592	ATP-dependent RNA helicase DeaD [EC:3.6.4.13]
CLUSTER228	5	COG3299	Uncharacterized phage protein gp47/JayE	-	-
CLUSTER229	5	COG1974	SOS-response transcriptional repressor LexA (RecA-mediated autopeptidase)	K01356	repressor LexA [EC:3.4.21.88]
CLUSTER230	5	-	-	-	-
CLUSTER231	5	-	-	-	-
CLUSTER232	5	-	-	-	-
CLUSTER233	5	-	-	-	-
CLUSTER234	5	COG1680	CubicO group peptidase, beta-lactamase class C family	-	-
CLUSTER235	5	-	-	-	-
CLUSTER236	5	-	-	-	-
CLUSTER237	5	COG1783	Phage terminase large subunit	K06909	phage terminase large subunit
CLUSTER238	5	-	-	-	-
CLUSTER239	5	-	-	-	-
CLUSTER240	5	COG1652	Cytoplasmic potassium-binding protein Kbp/XkdP/YgaU, contains LysM domain	-	-
CLUSTER241	5	COG3953	SLT domain protein	-	-
CLUSTER242	5	COG0492	Thioredoxin reductase	K07222	putative flavoprotein involved in K+ transport
CLUSTER243	5	COG0583	DNA-binding transcriptional regulator, LysR family	-	-
CLUSTER244	5	COG0778	Nitroreductase	K15976	putative NAD(P)H nitroreductase [EC:1.-.-.-]
CLUSTER245	5	COG5879	Spore coat protein CotD	K06327	spore coat protein D
CLUSTER246	5	COG1237	Metal-dependent hydrolase, beta-lactamase superfamily II	-	-
CLUSTER247	5	COG2249	Putative NADPH-quinone reductase (modulator of drug activity B)	K00355	NAD(P)H dehydrogenase (quinone) [EC:1.6.5.2]
CLUSTER248	5	COG5518	Phage capsid portal protein XkdE	-	-
CLUSTER249	5	COG1131	ABC-type multidrug transport system, ATPase component	K16907	fluoroquinolone transport system ATP-binding protein [EC:7.6.2.-]
CLUSTER250	5	COG1134	ABC-type polysaccharide/polyol phosphate transport system, ATPase component	K09693	teichoic acid transport system ATP-binding protein [EC:7.5.2.4]
CLUSTER251	5	-	-	-	-
CLUSTER252	5	COG5846	Stage VI sporulation protein SpoVID (LysM domain), required for assembly of the spore coat	K06417	stage VI sporulation protein D
CLUSTER253	5	-	-	-	-
CLUSTER254	5	-	-	-	-
CLUSTER255	5	-	-	-	-
CLUSTER256	4	COG2721	Altronate dehydratase	K01708	galactarate dehydratase [EC:4.2.1.42]
CLUSTER257	4	COG0667	Pyridoxal reductase PdxI or related oxidoreductase, aldo/keto reductase family	-	-
CLUSTER258	4	COG0372	Citrate synthase	K01647	citrate synthase [EC:2.3.3.1]
CLUSTER259	4	COG0824	Acyl-CoA thioesterase FadM	K07107	acyl-CoA thioester hydrolase [EC:3.1.2.-]
CLUSTER260	4	COG0071	Small heat shock protein IbpA, HSP20 family	K06335	spore coat protein M
CLUSTER261	4	COG0561	Hydroxymethylpyrimidine pyrophosphatase and other HAD family phosphatases	-	-
CLUSTER262	4	COG1595	DNA-directed RNA polymerase specialized sigma subunit, sigma24 family	K03088	RNA polymerase sigma-70 factor, ECF subfamily
CLUSTER263	4	-	-	-	-
CLUSTER264	4	COG2409	Predicted lipid transporter YdfJ, MMPL/SSD domain, RND superfamily	K06994	putative drug exporter of the RND superfamily
CLUSTER265	4	COG1473	Metal-dependent amidase/aminoacylase/carboxypeptidase	-	-
CLUSTER266	4	COG1396	Transcriptional regulator, contains XRE-family HTH domain	K19449	XRE family transcriptional regulator, master regulator for biofilm formation
CLUSTER267	4	-	-	-	-
CLUSTER268	4	COG4897	General stress protein CsbA (function unknown)	-	-
CLUSTER269	4	-	-	-	-
CLUSTER270	4	COG5578	Uncharacterized membrane protein YesL	-	-
CLUSTER271	4	COG1878	Kynurenine formamidase	-	-
CLUSTER272	4	COG1009;COG2111	Membrane H+-translocase/NADH:ubiquinone oxidoreductase subunit 5 (chain L)/Multisubunit Na+/H+ antiporter, MnhA subunit;Multisubunit Na+/H+ antiporter, MnhB subunit	K05565	multicomponent Na+:H+ antiporter subunit A
CLUSTER273	4	-	-	-	-
CLUSTER274	4	COG0105	Nucleoside diphosphate kinase	K00940	nucleoside-diphosphate kinase [EC:2.7.4.6]
CLUSTER275	4	COG0595	mRNA degradation ribonuclease J1/J2	K12574	ribonuclease J [EC:3.1.-.-]
CLUSTER276	4	COG5911	Spore germination protease Gpr	K06012	spore protease [EC:3.4.24.78]
CLUSTER277	4	COG0238	Ribosomal protein S18	K02963	small subunit ribosomal protein S18
CLUSTER278	4	COG1605	Chorismate mutase	K23874	4-amino-4-deoxychorismate mutase [EC:5.4.99.67]
CLUSTER279	4	COG0439	Biotin carboxylase	-	-
CLUSTER280	4	COG0830	Urease accessory protein UreF	K03188	urease accessory protein
CLUSTER281	4	COG0738	Fucose permease	K08174	MFS transporter, FHS family, glucose/mannose:H+ symporter
CLUSTER282	4	COG1004	UDP-glucose 6-dehydrogenase	K00012	UDPglucose 6-dehydrogenase [EC:1.1.1.22]
CLUSTER283	4	-	-	-	-
CLUSTER284	4	-	-	-	-
CLUSTER285	4	COG5434	Polygalacturonase	-	-
CLUSTER286	4	COG2207;COG0614	AraC-type DNA-binding domain and AraC-containing proteins;ABC-type Fe3+-hydroxamate transport system, periplasmic component	K21701	AraC family transcriptional regulator, transcriptional activator for feuABC-ybbA operon
CLUSTER287	4	-	-	-	-
CLUSTER288	4	-	-	K06315	transcriptional regulator of the spore photoproduct lyase operon
CLUSTER289	4	COG0022	Pyruvate/2-oxoglutarate/acetoin dehydrogenase complex, dehydrogenase (E1) component, beta subunit	K21417	acetoin:2,6-dichlorophenolindophenol oxidoreductase subunit beta [EC:1.1.1.-]
CLUSTER290	4	COG4840	Uncharacterized conserved protein YfkK, UPF0435 family	-	-
CLUSTER291	4	COG0819	Aminopyrimidine aminohydrolase TenA (thiamine salvage pathway)	K03707	thiaminase (transcriptional activator TenA) [EC:3.5.99.2]
CLUSTER292	4	COG0420	DNA repair exonuclease SbcCD nuclease subunit	K03547	DNA repair protein SbcD/Mre11
CLUSTER293	4	COG2846	Iron-sulfur cluster repair protein YtfE, RIC family, contains ScdAN and hemerythrin domains	K07322	regulator of cell morphogenesis and NO signaling
CLUSTER294	4	COG1942	Phenylpyruvate tautomerase PptA, 4-oxalocrotonate tautomerase family	-	-
CLUSTER295	4	COG0595	mRNA degradation ribonuclease J1/J2	K12574	ribonuclease J [EC:3.1.-.-]
CLUSTER296	4	-	-	-	-
CLUSTER297	4	COG3118	Chaperedoxin CnoX, contains thioredoxin-like and TPR-like domains, YbbN/TrxSC family	K03671	thioredoxin 1
CLUSTER298	4	-	-	-	-
CLUSTER299	4	-	-	-	-
CLUSTER300	4	COG0819	Aminopyrimidine aminohydrolase TenA (thiamine salvage pathway)	K03707	thiaminase (transcriptional activator TenA) [EC:3.5.99.2]
CLUSTER301	4	-	-	-	-
CLUSTER302	4	COG1393	Arsenate reductase or related protein, glutaredoxin family	K00537	arsenate reductase (glutaredoxin) [EC:1.20.4.1]
CLUSTER303	4	COG1181	D-alanine-D-alanine ligase or related ATP-grasp enzyme	K01921	D-alanine-D-alanine ligase [EC:6.3.2.4]
CLUSTER304	4	-	-	-	-
CLUSTER305	4	COG1902	2,4-dienoyl-CoA reductase or related NADH-dependent reductase, Old Yellow Enzyme (OYE) family	K00354	NADPH2 dehydrogenase [EC:1.6.99.1]
CLUSTER306	4	-	-	-	-
CLUSTER307	4	-	-	-	-
CLUSTER308	4	COG0758	Predicted Rossmann fold nucleotide-binding protein DprA/Smf involved in DNA uptake	K04096	DNA processing protein
CLUSTER309	4	COG2084	3-hydroxyisobutyrate dehydrogenase or related beta-hydroxyacid dehydrogenase	K00020	3-hydroxyisobutyrate dehydrogenase [EC:1.1.1.31]
CLUSTER310	4	COG0076	Glutamate or tyrosine decarboxylase or a related PLP-dependent protein	K13745	L-2,4-diaminobutyrate decarboxylase [EC:4.1.1.86]
CLUSTER311	4	COG1120	ABC-type cobalamin/Fe3+-siderophores transport system, ATPase component	K25028	cobalamin transport system ATP-binding protein [EC:7.6.2.8]
CLUSTER312	4	COG5817	Stage II sporulation protein SpoIIE/SpoIIH (serine phosphatase - sigma-F activation)	K06382	stage II sporulation protein E [EC:3.1.3.16]
CLUSTER313	4	COG1309	DNA-binding protein, AcrR family, includes nucleoid occlusion protein SlmA	K13770	TetR/AcrR family transcriptional regulator, fatty acid metabolism regulator protein
CLUSTER314	4	COG1968	Undecaprenyl pyrophosphate phosphatase	K06153	undecaprenyl-diphosphatase [EC:3.6.1.27]
CLUSTER315	4	COG3869	Protein-arginine kinase McsB	K19405	protein arginine kinase [EC:2.7.14.1]
CLUSTER316	4	COG3238	Uncharacterized membrane protein YdcZ, DUF606 family	K09936	bacterial/archaeal transporter family-2 protein
CLUSTER317	4	-	-	-	-
CLUSTER318	4	-	-	-	-
CLUSTER319	4	-	-	K06347	kinase-associated protein B
CLUSTER320	4	COG2814	Predicted arabinose efflux permease AraJ, MFS family	-	-
CLUSTER321	4	COG1234	Ribonuclease BN, tRNA processing enzyme	K00784	ribonuclease Z [EC:3.1.26.11]
CLUSTER322	4	-	-	-	-
CLUSTER323	4	COG1162	Ribosome biogenesis GTPase RsgA	K06949	ribosome biogenesis GTPase / thiamine phosphate phosphatase [EC:3.6.1.- 3.1.3.100]
CLUSTER324	4	COG0592	DNA polymerase III sliding clamp (beta) subunit, PCNA homolog	K02338	DNA polymerase III subunit beta [EC:2.7.7.7]
CLUSTER325	4	COG0829	Urease accessory protein UreH	K03190	urease accessory protein
CLUSTER326	4	COG5925	Uncharacterized sporulation membrane protein YtrH/SpoVIGA	-	-
CLUSTER327	4	COG2226	Ubiquinone/menaquinone biosynthesis C-methylase UbiE/MenG	K17462	putative AdoMet-dependent methyltransferase [EC:2.1.1.-]
CLUSTER328	4	COG1197	Transcription-repair coupling factor (superfamily II helicase)	K03723	transcription-repair coupling factor (superfamily II helicase) [EC:3.6.4.-]
CLUSTER329	4	COG2401	ABC-type ATPase fused to a predicted acetyltransferase domain	-	-
CLUSTER330	4	-	-	-	-
CLUSTER331	4	COG1317	Flagellar biosynthesis/type III secretory pathway protein FliH	K02411	flagellar assembly protein FliH
CLUSTER332	4	-	-	-	-
CLUSTER333	4	COG1105	1-phosphofructokinase or 6-phosphofructokinase II	K00882	1-phosphofructokinase [EC:2.7.1.56]
CLUSTER334	4	COG0669	Phosphopantetheine adenylyltransferase	K00954	pantetheine-phosphate adenylyltransferase [EC:2.7.7.3]
CLUSTER335	4	COG4692	Predicted neuraminidase (sialidase)	-	-
CLUSTER336	4	COG0527	Aspartate kinase	K00928	aspartate kinase [EC:2.7.2.4]
CLUSTER337	4	COG1702	Phosphate starvation-inducible protein PhoH, predicted ATPase	K06217	phosphate starvation-inducible protein PhoH and related proteins
CLUSTER338	4	COG2156	K+-transporting ATPase, KdpC subunit	K01548	potassium-transporting ATPase KdpC subunit
CLUSTER339	4	COG0237	Dephospho-CoA kinase	K00859	dephospho-CoA kinase [EC:2.7.1.24]
CLUSTER340	4	COG0488	ATPase components of ABC transporters with duplicated ATPase domains	K15738	ABC transport system ATP-binding/permease protein
CLUSTER341	4	COG0591	Na+/proline symporter	K03307	solute:Na+ symporter, SSS family
CLUSTER342	4	-	-	-	-
CLUSTER343	4	COG1950	Uncharacterized membrane protein YvlD, DUF360 family	K08972	putative membrane protein
CLUSTER344	4	COG3829	RocR-type transcriptional regulator, contains PAS, AAA-type ATPase, and DNA-binding Fis domains	K02688	transcriptional regulator, propionate catabolism operon regulatory protein
CLUSTER345	4	COG1757	Na+/H+ antiporter NhaC/MleN	K03315	Na+:H+ antiporter, NhaC family
CLUSTER346	4	COG1658	5S rRNA maturation ribonuclease M5, contains TOPRIM domain	K07476	toprim domain protein
CLUSTER347	4	COG0769	UDP-N-acetylmuramyl tripeptide synthase	K01932	gamma-polyglutamate synthase [EC:6.3.2.-]
CLUSTER348	4	COG5910	Spore germination protein GerPE (inner spore coat)	K06303	spore germination protein PE
CLUSTER349	4	COG1694	NTP pyrophosphatase, house-cleaning of non-canonical NTPs	-	-
CLUSTER350	4	-	-	-	-
CLUSTER351	4	COG0352	Thiamine monophosphate synthase	K00788	thiamine-phosphate pyrophosphorylase [EC:2.5.1.3]
CLUSTER352	4	COG3906	Uncharacterized conserved protein YrzB, UPF0473 family	-	-
CLUSTER353	4	COG3384	Aromatic ring-opening dioxygenase, catalytic subunit, LigB family	K00455	3,4-dihydroxyphenylacetate 2,3-dioxygenase [EC:1.13.11.15]
CLUSTER354	4	-	-	-	-
CLUSTER355	4	COG5896	Spore coat protein YraE/YraG	K06440	similar to spore coat protein
CLUSTER356	4	COG3478	Predicted nucleic-acid-binding protein, contains Zn-ribbon domain	K07069	uncharacterized protein
CLUSTER357	4	COG1024;COG1250	Enoyl-CoA hydratase/carnithine racemase;3-hydroxyacyl-CoA dehydrogenase	K07516	3-hydroxyacyl-CoA dehydrogenase [EC:1.1.1.35]
CLUSTER358	4	COG1490	D-aminoacyl-tRNA deacylase	K07560	D-aminoacyl-tRNA deacylase [EC:3.1.1.96]
CLUSTER359	4	COG3290	Sensor histidine kinase DipB regulating citrate/malate metabolism	K11614	two-component system, CitB family, sensor histidine kinase MalK [EC:2.7.13.3]
CLUSTER360	4	COG0207	Thymidylate synthase	K00560	thymidylate synthase [EC:2.1.1.45]
CLUSTER361	4	-	-	K01992	ABC-2 type transport system permease protein
CLUSTER362	4	-	-	-	-
CLUSTER363	4	COG0371	Glycerol dehydrogenase or related enzyme, iron-containing ADH family	K08317	hydroxycarboxylate dehydrogenase A [EC:1.1.1.-]
CLUSTER364	4	COG1722	Exonuclease VII small subunit	K03602	exodeoxyribonuclease VII small subunit [EC:3.1.11.6]
CLUSTER365	4	COG1173	ABC-type dipeptide/oligopeptide/nickel transport system, permease component	K02034	peptide/nickel transport system permease protein
CLUSTER366	4	COG0001	Glutamate-1-semialdehyde aminotransferase	K01845	glutamate-1-semialdehyde 2,1-aminomutase [EC:5.4.3.8]
CLUSTER367	4	-	-	-	-
CLUSTER368	4	COG0789	DNA-binding transcriptional regulator, MerR family	K03713	MerR family transcriptional regulator, glutamine synthetase repressor
CLUSTER369	4	COG0762	Cytochrome b6 maturation protein CCB3/Ycf19 and related maturases, YggT family	K02221	YggT family protein
CLUSTER370	4	COG1071	TPP-dependent pyruvate or acetoin dehydrogenase subunit alpha	K21416	acetoin:2,6-dichlorophenolindophenol oxidoreductase subunit alpha [EC:1.1.1.-]
CLUSTER371	4	COG1658	5S rRNA maturation ribonuclease M5, contains TOPRIM domain	K05985	ribonuclease M5 [EC:3.1.26.8]
CLUSTER372	4	COG0531	Serine transporter YbeC, amino acid:H+ symporter family	K14052	putrescine importer
CLUSTER373	4	COG1725	DNA-binding transcriptional regulator YhcF, GntR family	-	-
CLUSTER374	4	COG0583	DNA-binding transcriptional regulator, LysR family	-	-
CLUSTER375	4	COG0534	Na+-driven multidrug efflux pump, DinF/NorM/MATE family	-	-
CLUSTER376	4	-	-	-	-
CLUSTER377	4	COG0720	6-pyruvoyl-tetrahydropterin synthase	K01737	6-pyruvoyltetrahydropterin/6-carboxytetrahydropterin synthase [EC:4.2.3.12 4.1.2.50]
CLUSTER378	4	COG0697	Permease of the drug/metabolite transporter (DMT) superfamily	K03298	drug/metabolite transporter, DME family
CLUSTER379	4	COG0494	8-oxo-dGTP pyrophosphatase MutT and related house-cleaning NTP pyrophosphohydrolases, NUDIX family	K01515	ADP-ribose pyrophosphatase [EC:3.6.1.13]
CLUSTER380	4	COG0050	Translation elongation factor EF-Tu, a GTPase	K02358	elongation factor Tu
CLUSTER381	4	COG0366	Glycosidase/amylase (phosphorylase)	K01176	alpha-amylase [EC:3.2.1.1]
CLUSTER382	4	COG1205	ATP-dependent helicase YprA, contains C-terminal metal-binding DUF1998 domain	K06877	DEAD/DEAH box helicase domain-containing protein
CLUSTER384	4	COG1846	DNA-binding transcriptional regulator, MarR family	-	-
CLUSTER385	4	COG1510	DNA-binding transcriptional regulator GbsR, MarR family	K22301	HTH-type transcriptional regulator, osmoprotectant uptake regulator
CLUSTER386	4	COG1595	DNA-directed RNA polymerase specialized sigma subunit, sigma24 family	K24072	positive control factor
CLUSTER387	4	COG2227	2-polyprenyl-3-methyl-5-hydroxy-6-metoxy-1,4-benzoquinol methylase	-	-
CLUSTER388	4	COG1648	Siroheme synthase (precorrin-2 oxidase/ferrochelatase domain)	K24866	precorrin-2 dehydrogenase [EC:1.3.1.76]
CLUSTER389	4	COG4399	Uncharacterized membrane protein YheB, UPF0754 family	-	-
CLUSTER390	4	-	-	-	-
CLUSTER391	4	COG0573	ABC-type phosphate transport system, permease component	K02037	phosphate transport system permease protein
CLUSTER392	4	COG4876	Uncharacterized conserved protein YdaT	-	-
CLUSTER393	4	COG0663	Carbonic anhydrase or acetyltransferase, isoleucine patch superfamily	-	-
CLUSTER394	4	COG0473	Isocitrate/isopropylmalate dehydrogenase	K00052	3-isopropylmalate dehydrogenase [EC:1.1.1.85]
CLUSTER395	4	COG3858	Spore cortex hydrolase SleL/YaaH, N-acetylglucosaminidase of GH18 family	K06306	spore germination protein
CLUSTER396	4	COG4466	Uncharacterized conserved protein Veg, DUF1021 family	-	-
CLUSTER397	4	COG3613	Nucleoside 2-deoxyribosyltransferase	-	-
CLUSTER398	4	COG4753	Two-component response regulator, YesN/AraC family, consists of REC and AraC-type DNA-binding domains	-	-
CLUSTER399	4	-	-	-	-
CLUSTER400	4	COG4826	Serine protease inhibitor	-	-
CLUSTER401	4	COG0200	Ribosomal protein L15	K02876	large subunit ribosomal protein L15
CLUSTER402	4	COG0372	Citrate synthase	K01647	citrate synthase [EC:2.3.3.1]
CLUSTER403	4	COG0006	Xaa-Pro aminopeptidase	K01262	Xaa-Pro aminopeptidase [EC:3.4.11.9]
CLUSTER404	4	COG5912	Spore cortex protein CoxA (YrbB), YhcN/YlaJ family	-	-
CLUSTER405	4	COG1523	Pullulanase/glycogen debranching enzyme	K01200	pullulanase [EC:3.2.1.41]
CLUSTER406	4	COG1846	DNA-binding transcriptional regulator, MarR family	-	-
CLUSTER407	4	COG1819	UDP:flavonoid glycosyltransferase YjiC, YdhE family	-	-
CLUSTER408	4	COG1514	RNA 2',3'-cyclic phosphodiesterase (2'-5' RNA ligase)	K01975	RNA 2',3'-cyclic 3'-phosphodiesterase [EC:3.1.4.58]
CLUSTER409	4	COG1073	Fermentation-respiration switch esterase FrsA, DUF1100 family	K06889	uncharacterized protein
CLUSTER410	4	COG5883	Spore coat protein CotJB	K06333	spore coat protein JB
CLUSTER411	4	COG4485	Uncharacterized membrane protein YfhO	-	-
CLUSTER412	4	COG0457	Tetratricopeptide (TPR) repeat	-	-
CLUSTER413	4	COG5801	Stage 0 sporulation initiation regulator Spo0A (response regulator, REC-HTH domains)	K07699	two-component system, response regulator, stage 0 sporulation protein A
CLUSTER414	4	COG5926	Uncharacterized sporulation protein YtrI	-	-
CLUSTER415	4	COG1063	Threonine dehydrogenase or related Zn-dependent dehydrogenase	K00060	threonine 3-dehydrogenase [EC:1.1.1.103]
CLUSTER416	4	COG0346	Catechol 2,3-dioxygenase or related enzyme, vicinal oxygen chelate (VOC) family	K11210	metallothiol transferase [EC:2.5.1.-]
CLUSTER417	4	COG0583	DNA-binding transcriptional regulator, LysR family	-	-
CLUSTER418	4	COG0475;COG0569	Kef-type K+ transport system, membrane component KefB;Trk/Ktr K+ transport system regulatory component TrkA/KtrA/KtrC, RCK domain	K03455	monovalent cation:H+ antiporter-2, CPA2 family
CLUSTER419	4	COG0456	Ribosomal protein S18 acetylase RimI and related acetyltransferases	K03789	[ribosomal protein S18]-alanine N-acetyltransferase [EC:2.3.1.266]
CLUSTER420	4	-	-	-	-
CLUSTER421	4	COG1420	Transcriptional regulator of heat shock response	K03705	heat-inducible transcriptional repressor
CLUSTER422	4	COG1942	Phenylpyruvate tautomerase PptA, 4-oxalocrotonate tautomerase family	K01821	4-oxalocrotonate tautomerase [EC:5.3.2.6]
CLUSTER423	4	COG0759	Membrane-anchored protein YidD, putatitve component of membrane protein insertase Oxa1/YidC/SpoIIIJ	K08998	uncharacterized protein
CLUSTER424	4	COG1240	vWFA (von Willebrand factor type A) domain of Mg and Co chelatases	K07114	Ca-activated chloride channel homolog
CLUSTER425	4	COG1854	S-ribosylhomocysteine lyase LuxS, autoinducer biosynthesis	K07173	S-ribosylhomocysteine lyase [EC:4.4.1.21]
CLUSTER426	4	COG0772	Peptodoglycan polymerase FtsW/RodA/SpoVE	K03588	cell division protein FtsW
CLUSTER427	4	COG0589	Nucleotide-binding universal stress protein, UspA family	-	-
CLUSTER428	4	COG5841	Stage V sporulation protein SpoVB/SpoIIIF, required for spore cortex synthesis	K06409	stage V sporulation protein B
CLUSTER429	4	COG1459	Type II secretory pathway, component PulF	K02244	competence protein ComGB
CLUSTER430	4	COG0520	Selenocysteine lyase/Cysteine desulfurase	-	-
CLUSTER431	4	COG0491	Glyoxylase or a related metal-dependent hydrolase, beta-lactamase superfamily II	K01069	hydroxyacylglutathione hydrolase [EC:3.1.2.6]
CLUSTER432	4	-	-	-	-
CLUSTER433	4	COG2220	L-ascorbate lactonase UlaG, metallo-beta-lactamase superfamily	-	-
CLUSTER434	4	COG1012	Acyl-CoA reductase or other NAD-dependent aldehyde dehydrogenase	K22187	alpha-ketoglutaric semialdehyde dehydrogenase [EC:1.2.1.-]
CLUSTER435	4	COG2120	N-acetylglucosaminyl deacetylase, LmbE family	K01463	N-acetylglucosamine malate deacetylase 1 [EC:3.5.1.-]
CLUSTER436	4	COG0663	Carbonic anhydrase or acetyltransferase, isoleucine patch superfamily	K01743	carbonic anhydrase [EC:4.2.1.1]
CLUSTER437	4	COG1256	Flagellar hook-associated protein FlgK	K02396	flagellar hook-associated protein 1
CLUSTER438	4	COG2079	2-methylcitrate dehydratase PrpD	K01720	2-methylcitrate dehydratase [EC:4.2.1.79]
CLUSTER439	4	COG2151	Metal-sulfur cluster biosynthetic enzyme	-	-
CLUSTER440	4	COG2427	Uncharacterized conserved protein YjgD, DUF1641 family	-	-
CLUSTER441	4	COG1609	DNA-binding transcriptional regulator, LacI/PurR family	K02103	GntR family transcriptional regulator, arabinose operon transcriptional repressor
CLUSTER442	4	COG3973	DNA helicase IV	K03657	DNA helicase II / ATP-dependent DNA helicase PcrA [EC:3.6.4.12]
CLUSTER443	4	COG0371	Glycerol dehydrogenase or related enzyme, iron-containing ADH family	K00096	glycerol-1-phosphate dehydrogenase [NAD(P)+] [EC:1.1.1.261]
CLUSTER444	4	COG2339	Membrane proteinase PrsW, cleaves anti-sigma factor RsiW, M82 family	K24131	protease PrsW [EC:3.4.-.-]
CLUSTER445	4	COG1983	Phage shock protein PspC (stress-responsive transcriptional regulator)	K03973	phage shock protein C
CLUSTER446	4	COG3104	Dipeptide/tripeptide permease	K03305	proton-dependent oligopeptide transporter, POT family
CLUSTER447	4	COG0842	ABC-type multidrug transport system, permease component	K01992	ABC-2 type transport system permease protein
CLUSTER448	4	COG2163	Ribosomal protein L14E/L6E/L27E	-	-
CLUSTER449	4	-	-	-	-
CLUSTER450	4	COG1424	Pimeloyl-CoA synthetase	K01906	6-carboxyhexanoate--CoA ligase [EC:6.2.1.14]
CLUSTER451	4	COG4152	ABC-type uncharacterized transport system, ATPase component	K01990	ABC-2 type transport system ATP-binding protein
CLUSTER452	4	COG1028	NAD(P)-dependent dehydrogenase, short-chain alcohol dehydrogenase family	K00059	3-oxoacyl-[acyl-carrier protein] reductase [EC:1.1.1.100]
CLUSTER453	4	COG1263	Phosphotransferase system IIC components, glucose/maltose/N-acetylglucosamine-specific	K02804	N-acetylglucosamine PTS system EIICBA or EIICB component [EC:2.7.1.193]
CLUSTER454	4	COG1164	Oligoendopeptidase F	K08602	oligoendopeptidase F [EC:3.4.24.-]
CLUSTER455	4	-	-	-	-
CLUSTER456	4	COG0146	N-methylhydantoinase B/oxoprolinase/acetone carboxylase, alpha subunit	K01474	N-methylhydantoinase B [EC:3.5.2.14]
CLUSTER457	4	-	-	-	-
CLUSTER458	4	COG0313	16S rRNA C1402 (ribose-2'-O) methylase RsmI	K07056	16S rRNA (cytidine1402-2'-O)-methyltransferase [EC:2.1.1.198]
CLUSTER459	4	COG4896	Uncharacterized conserved protein YlaI, DUF2197 family	-	-
CLUSTER460	4	COG0087	Ribosomal protein L3	K02906	large subunit ribosomal protein L3
CLUSTER461	4	COG0840	Methyl-accepting chemotaxis protein (MCP)	K03406	methyl-accepting chemotaxis protein
CLUSTER462	4	COG2267	Lysophospholipase, alpha-beta hydrolase superfamily	-	-
CLUSTER463	4	COG1714	Uncharacterized membrane protein YckC, RDD family	-	-
CLUSTER464	4	COG4932	Clumping factor A-related surface protein, MSCRAMM (microbial surface components recognizing adhesive matrix molecules) family, DEv-IgG fold	-	-
CLUSTER465	4	COG1733	DNA-binding transcriptional regulator, HxlR family	-	-
CLUSTER466	4	COG1728	Uncharacterized conserved protein YaaR, TM1646/DUF327 family	K09770	uncharacterized protein
CLUSTER467	4	COG0489	Fe-S cluster carrier ATPase, Mrp/ApbC/NBP35 family	K00903	protein-tyrosine kinase [EC:2.7.10.2]
CLUSTER468	4	COG0080	Ribosomal protein L11	K02867	large subunit ribosomal protein L11
CLUSTER469	4	COG1028	NAD(P)-dependent dehydrogenase, short-chain alcohol dehydrogenase family	K10780	enoyl-[acyl-carrier protein] reductase III [EC:1.3.1.104]
CLUSTER470	4	COG1080	Phosphoenolpyruvate-protein kinase (PTS system EI component in bacteria)	K08483	phosphoenolpyruvate-protein phosphotransferase (PTS system enzyme I) [EC:2.7.3.9]
CLUSTER471	4	COG1309	DNA-binding protein, AcrR family, includes nucleoid occlusion protein SlmA	-	-
CLUSTER472	4	COG0544	FKBP-type peptidyl-prolyl cis-trans isomerase (trigger factor)	K03545	trigger factor
CLUSTER473	4	COG0788	Formyltetrahydrofolate hydrolase	K01433	formyltetrahydrofolate deformylase [EC:3.5.1.10]
CLUSTER474	4	COG0288	Carbonic anhydrase	K01673	carbonic anhydrase [EC:4.2.1.1]
CLUSTER475	4	COG1263	Phosphotransferase system IIC components, glucose/maltose/N-acetylglucosamine-specific	K20118	glucose PTS system EIICBA or EIICB component [EC:2.7.1.199]
CLUSTER476	4	COG1609	DNA-binding transcriptional regulator, LacI/PurR family	K02103	GntR family transcriptional regulator, arabinose operon transcriptional repressor
CLUSTER477	4	COG1171	Threonine deaminase	K01754	threonine dehydratase [EC:4.3.1.19]
CLUSTER478	4	COG0612	Predicted Zn-dependent peptidase, M16 family	-	-
CLUSTER479	4	COG4166	ABC-type oligopeptide transport system, periplasmic component	K16199	dipeptide transport system substrate-binding protein
CLUSTER480	4	-	-	-	-
CLUSTER481	4	COG0845	Multidrug efflux pump subunit AcrA (membrane-fusion protein)	K24950	membrane fusion protein, antimicrobial resistance system
CLUSTER482	4	COG0077	Prephenate dehydratase	K04518	prephenate dehydratase [EC:4.2.1.51]
CLUSTER483	4	COG1063	Threonine dehydrogenase or related Zn-dependent dehydrogenase	-	-
CLUSTER484	4	COG0461	Orotate phosphoribosyltransferase	K00762	orotate phosphoribosyltransferase [EC:2.4.2.10]
CLUSTER485	4	COG0450	Alkyl hydroperoxide reductase subunit AhpC (peroxiredoxin)	K24119	NADH-dependent peroxiredoxin subunit C [EC:1.11.1.26]
CLUSTER486	4	COG0574	Phosphoenolpyruvate synthase/pyruvate phosphate dikinase	K22579	rifampicin phosphotransferase [EC:2.7.9.6]
CLUSTER487	4	-	-	-	-
CLUSTER488	4	COG0299	Folate-dependent phosphoribosylglycinamide formyltransferase PurN	K11175	phosphoribosylglycinamide formyltransferase 1 [EC:2.1.2.2]
CLUSTER489	4	COG5416	Uncharacterized integral membrane protein YrvD	K08992	lipopolysaccharide assembly protein A
CLUSTER490	4	COG4506	Uncharacterized beta-barrel protein YwiB, DUF1934 family	-	-
CLUSTER491	4	-	-	-	-
CLUSTER492	4	COG1455	Phosphotransferase system cellobiose-specific component IIC	K02761	cellobiose PTS system EIIC component
CLUSTER493	4	COG1670	Protein N-acetyltransferase, RimJ/RimL family	-	-
CLUSTER494	4	COG0596	2-succinyl-6-hydroxy-2,4-cyclohexadiene-1-carboxylate synthase MenH and related esterases, alpha/beta hydrolase fold	K00433	non-heme chloroperoxidase [EC:1.11.1.10]
CLUSTER495	4	-	-	K05593	aminoglycoside 6-adenylyltransferase [EC:2.7.7.-]
CLUSTER496	4	COG3480	Predicted secreted protein YlbL, contains PDZ domain	K07177	Lon-like protease
CLUSTER497	4	COG1408	Predicted phosphohydrolase, MPP superfamily	K07098	uncharacterized protein
CLUSTER498	4	COG3405	Endo-1,4-beta-D-glucanase Y	-	-
CLUSTER499	4	COG0287	Prephenate dehydrogenase	K24002	4-amino-4-deoxyprephenate dehydrogenase [EC:1.3.1.121]
CLUSTER500	4	COG2807	Cyanate permease	K03449	MFS transporter, CP family, cyanate transporter
CLUSTER501	4	COG2427	Uncharacterized conserved protein YjgD, DUF1641 family	-	-
CLUSTER502	4	COG2205	K+-sensing histidine kinase KdpD	-	-
CLUSTER503	4	COG0596	2-succinyl-6-hydroxy-2,4-cyclohexadiene-1-carboxylate synthase MenH and related esterases, alpha/beta hydrolase fold	K08680	2-succinyl-6-hydroxy-2,4-cyclohexadiene-1-carboxylate synthase [EC:4.2.99.20]
CLUSTER504	4	COG0591	Na+/proline symporter	K03307	solute:Na+ symporter, SSS family
CLUSTER505	4	COG2329	Heme-degrading monooxygenase HmoA and related ABM domain proteins	-	-
CLUSTER506	4	COG1595	DNA-directed RNA polymerase specialized sigma subunit, sigma24 family	K03088	RNA polymerase sigma-70 factor, ECF subfamily
CLUSTER507	4	COG0789	DNA-binding transcriptional regulator, MerR family	-	-
CLUSTER508	4	COG1309	DNA-binding protein, AcrR family, includes nucleoid occlusion protein SlmA	-	-
CLUSTER509	4	COG0531	Serine transporter YbeC, amino acid:H+ symporter family	-	-
CLUSTER510	4	COG0446	NADPH-dependent 2,4-dienoyl-CoA reductase, sulfur reductase, or a related oxidoreductase	K17218	sulfide:quinone oxidoreductase [EC:1.8.5.4]
CLUSTER511	4	-	-	-	-
CLUSTER512	4	-	-	K02423	flagellar protein FliT
CLUSTER513	4	COG1132	ABC-type multidrug transport system, ATPase and permease component	K18890	ATP-binding cassette, subfamily B, multidrug efflux pump
CLUSTER514	4	COG2318	Bacillithiol/mycothiol S-transferase BstA/DinB, DinB/YfiT family (unrelated to E. coli DinB)	-	-
CLUSTER515	4	COG1802	DNA-binding transcriptional regulator, GntR family	K22293	GntR family transcriptional regulator, rspAB operon transcriptional repressor
CLUSTER516	4	COG0531	Serine transporter YbeC, amino acid:H+ symporter family	-	-
CLUSTER517	4	COG0604	NADPH:quinone reductase or related Zn-dependent oxidoreductase	-	-
CLUSTER518	4	COG1001	Adenine deaminase	K01486	adenine deaminase [EC:3.5.4.2]
CLUSTER519	4	COG3829	RocR-type transcriptional regulator, contains PAS, AAA-type ATPase, and DNA-binding Fis domains	K06714	arginine utilization regulatory protein
CLUSTER520	4	COG4565	DNA-binding response regulator DpiB of citrate/malate metabolism	K11615	two-component system, CitB family, response regulator MalR
CLUSTER521	4	COG2357	ppGpp synthetase catalytic domain (RelA/SpoT-type nucleotidyltranferase)	K07816	putative GTP pyrophosphokinase [EC:2.7.6.5]
CLUSTER522	4	COG0472	UDP-N-acetylmuramyl pentapeptide phosphotransferase/UDP-N-acetylglucosamine-1-phosphate transferase	K01000	phospho-N-acetylmuramoyl-pentapeptide-transferase [EC:2.7.8.13]
CLUSTER523	4	COG2259	Uncharacterized membrane protein YphA, DoxX/SURF4 family	K15977	putative oxidoreductase
CLUSTER524	4	COG0697	Permease of the drug/metabolite transporter (DMT) superfamily	-	-
CLUSTER525	4	COG0642	Signal transduction histidine kinase	-	-
CLUSTER526	4	COG1113	L-asparagine transporter or related permease	K03293	amino acid transporter, AAT family
CLUSTER527	4	-	-	-	-
CLUSTER528	4	COG4224	Uncharacterized conserved protein YnzC, UPF0291/DUF896 family	-	-
CLUSTER529	4	COG0662	Mannose-6-phosphate isomerase, cupin superfamily	-	-
CLUSTER530	4	COG2235	Arginine deiminase	K01478	arginine deiminase [EC:3.5.3.6]
CLUSTER531	4	COG1131	ABC-type multidrug transport system, ATPase component	K25158	ABC-2 type transport system ATP-binding protein
CLUSTER532	4	COG1363	Putative aminopeptidase FrvX	K01269	aminopeptidase [EC:3.4.11.-]
CLUSTER533	4	COG1086	NDP-sugar epimerase, includes UDP-GlcNAc-inverting 4,6-dehydratase FlaA1 and capsular polysaccharide biosynthesis protein EpsC	K19421	polysaccharide biosynthesis protein EpsC
CLUSTER534	4	COG0584	Glycerophosphoryl diester phosphodiesterase	K01126	glycerophosphoryl diester phosphodiesterase [EC:3.1.4.46]
CLUSTER535	4	COG0583	DNA-binding transcriptional regulator, LysR family	-	-
CLUSTER536	4	COG0534	Na+-driven multidrug efflux pump, DinF/NorM/MATE family	K03327	multidrug resistance protein, MATE family
CLUSTER537	4	COG0370	Fe2+ transporter FeoB	K04759	ferrous iron transport protein B
CLUSTER538	4	COG0750	Membrane-associated protease RseP, regulator of RpoE activity	K11749	regulator of sigma E protease [EC:3.4.24.-]
CLUSTER539	4	COG4585	Signal transduction histidine kinase ComP	K11617	two-component system, NarL family, sensor histidine kinase LiaS [EC:2.7.13.3]
CLUSTER540	4	COG1113	L-asparagine transporter or related permease	K03293	amino acid transporter, AAT family
CLUSTER541	4	COG1587	Uroporphyrinogen-III synthase	K01719	uroporphyrinogen-III synthase [EC:4.2.1.75]
CLUSTER542	4	COG1012	Acyl-CoA reductase or other NAD-dependent aldehyde dehydrogenase	K21802	vanillin dehydrogenase [EC:1.2.1.67]
CLUSTER543	4	COG1476	DNA-binding transcriptional regulator, XRE-family HTH domain	-	-
CLUSTER544	4	-	-	-	-
CLUSTER545	4	COG1254	Acylphosphatase	K01512	acylphosphatase [EC:3.6.1.7]
CLUSTER546	4	COG5804	Stage 0 sporulation regulatory phosphatase Spo0E	-	-
CLUSTER547	4	-	-	-	-
CLUSTER548	4	COG0665	Glycine/D-amino acid oxidase (deaminating)	-	-
CLUSTER549	4	COG1320	Multisubunit Na+/H+ antiporter, MnhG subunit	K05571	multicomponent Na+:H+ antiporter subunit G
CLUSTER550	4	COG1266	Membrane protease YdiL, CAAX protease family	K07052	CAAX protease family protein
CLUSTER551	4	COG4703	Uncharacterized conserved protein YkuJ, DUF1797 family	-	-
CLUSTER552	4	COG2197	DNA-binding response regulator, NarL/FixJ family, contains REC and HTH domains	K11618	two-component system, NarL family, response regulator LiaR
CLUSTER553	4	COG2271	Sugar phosphate permease	K08369	MFS transporter, putative metabolite:H+ symporter
CLUSTER554	4	-	-	-	-
CLUSTER555	4	COG1621	Sucrose-6-phosphate hydrolase SacC, GH32 family	K01212	levanase [EC:3.2.1.65]
CLUSTER556	4	COG5897	Spore coat protein YsxE, aminoglycoside phosphotransferase family	-	-
CLUSTER557	4	COG0577	ABC-type antimicrobial peptide transport system, permease component	K24948	antimicrobial peptide resistance transport system permease protein
CLUSTER558	4	COG2404	Oligoribonuclease NrnA/c-di-AMP phosphodiesterase DhhP, DHH superfamily	K07097	uncharacterized protein
CLUSTER559	4	-	-	-	-
CLUSTER560	4	COG0318	O-succinylbenzoic acid-CoA ligase MenE or related acyl-CoA synthetase (AMP-forming)	K01897	long-chain acyl-CoA synthetase [EC:6.2.1.3]
CLUSTER561	4	COG0765	ABC-type amino acid transport system, permease component	K17077	arginine/lysine/histidine transport system permease protein
CLUSTER562	4	COG0412	Dienelactone hydrolase	-	-
CLUSTER563	4	COG1802	DNA-binding transcriptional regulator, GntR family	-	-
CLUSTER564	4	COG5577	Spore coat protein CotF	-	-
CLUSTER565	4	COG2205	K+-sensing histidine kinase KdpD	-	-
CLUSTER566	4	COG2814	Predicted arabinose efflux permease AraJ, MFS family	-	-
CLUSTER567	4	COG0515	Serine/threonine protein kinase	K12132	eukaryotic-like serine/threonine-protein kinase [EC:2.7.11.1]
CLUSTER568	4	COG1744	Lipoprotein Med, regulator of KinD/Spo0A, PBP1-ABC superfamily, includes NupN	K05519	transcriptional activator of comK gene
CLUSTER569	4	COG0525	Valyl-tRNA synthetase	K01873	valyl-tRNA synthetase [EC:6.1.1.9]
CLUSTER570	4	COG0697	Permease of the drug/metabolite transporter (DMT) superfamily	-	-
CLUSTER571	4	COG4907	Uncharacterized membrane protein	-	-
CLUSTER572	4	COG3586	Uncharacterized protein domain, C-terminal to COG1479 DNAse/DNA nickase	-	-
CLUSTER573	4	COG2814	Predicted arabinose efflux permease AraJ, MFS family	K07552	MFS transporter, DHA1 family, multidrug resistance protein
CLUSTER574	4	COG1699	Flagellar assembly factor FliW	K13626	flagellar assembly factor FliW
CLUSTER575	4	-	-	-	-
CLUSTER576	4	COG2207	AraC-type DNA-binding domain and AraC-containing proteins	-	-
CLUSTER577	4	COG5822	Stage II sporulation protein SpoIIR, required for processing of pro-sigma-E	K06387	stage II sporulation protein R
CLUSTER578	4	COG0350	DNA repair enzyme Ada (O6-methylguanine-DNA--protein-cysteine methyltransferase)	K13531	methylated-DNA-[protein]-cysteine S-methyltransferase [EC:2.1.1.63]
CLUSTER579	4	COG2226	Ubiquinone/menaquinone biosynthesis C-methylase UbiE/MenG	-	-
CLUSTER580	4	COG0642	Signal transduction histidine kinase	K11633	two-component system, OmpR family, sensor histidine kinase YxdK [EC:2.7.13.3]
CLUSTER581	4	COG0793	C-terminal processing protease CtpA/Prc, contains a PDZ domain	K03797	carboxyl-terminal processing protease [EC:3.4.21.102]
CLUSTER582	4	COG1806	Regulator of PEP synthase PpsR, kinase-PPPase family (combines ADP:protein kinase and phosphorylase activities)	K09773	[pyruvate, water dikinase]-phosphate phosphotransferase / [pyruvate, water dikinase] kinase [EC:2.7.4.28 2.7.11.33]
CLUSTER583	4	COG2814	Predicted arabinose efflux permease AraJ, MFS family	K18926	MFS transporter, DHA2 family, lincomycin resistance protein
CLUSTER584	4	COG0147	Anthranilate/para-aminobenzoate synthases component I	K01665	para-aminobenzoate synthetase component I [EC:2.6.1.85]
CLUSTER585	4	COG4844	Uncharacterized conserved protein YuzB, UPF0349 family	-	-
CLUSTER586	4	COG4264	Siderophore synthetase component IucA/IucC/SbnC	-	-
CLUSTER587	4	COG0742	16S rRNA G966 N2-methylase RsmD	K08316	16S rRNA (guanine966-N2)-methyltransferase [EC:2.1.1.171]
CLUSTER588	4	COG0726	Peptidoglycan/xylan/chitin deacetylase, PgdA/NodB/CDA1 family	K22278	peptidoglycan-N-acetylglucosamine deacetylase [EC:3.5.1.104]
CLUSTER589	4	COG0015	Adenylosuccinate lyase	K01756	adenylosuccinate lyase [EC:4.3.2.2]
CLUSTER590	4	COG4129	Uncharacterized membrane protein YgaE, UPF0421/DUF939 family	-	-
CLUSTER591	4	COG1028	NAD(P)-dependent dehydrogenase, short-chain alcohol dehydrogenase family	K16216	benzil reductase ((S)-benzoin forming) [EC:1.1.1.320]
CLUSTER592	4	-	-	-	-
CLUSTER593	4	COG2226	Ubiquinone/menaquinone biosynthesis C-methylase UbiE/MenG	K00563	23S rRNA (guanine745-N1)-methyltransferase [EC:2.1.1.187]
CLUSTER594	4	COG1486	Alpha-galactosidase/6-phospho-beta-glucosidase, family 4 of glycosyl hydrolase	K07406	alpha-galactosidase [EC:3.2.1.22]
CLUSTER595	4	-	-	-	-
CLUSTER596	4	COG3331	Penicillin-binding protein-related factor A, putative recombinase	K03700	recombination protein U
CLUSTER597	4	COG5904	Spore germination receptor GerD	K06294	spore germination protein D
CLUSTER598	4	-	-	-	-
CLUSTER599	4	COG0077	Prephenate dehydratase	-	-
CLUSTER600	4	COG1132	ABC-type multidrug transport system, ATPase and permease component	K18887	ATP-binding cassette, subfamily B, multidrug efflux pump
CLUSTER601	4	COG4682	Uncharacterized membrane protein YiaA	-	-
CLUSTER602	4	COG1752	Predicted acylesterase/phospholipase RssA, containd patatin domain	K07001	NTE family protein
CLUSTER603	4	-	-	-	-
CLUSTER604	4	COG1012	Acyl-CoA reductase or other NAD-dependent aldehyde dehydrogenase	K00135	succinate-semialdehyde dehydrogenase / glutarate-semialdehyde dehydrogenase [EC:1.2.1.16 1.2.1.79 1.2.1.20]
CLUSTER605	4	COG3458	Cephalosporin-C deacetylase or related acetyl esterase	K01060	cephalosporin-C deacetylase [EC:3.1.1.41]
CLUSTER606	4	COG0130	tRNA U55 pseudouridine synthase TruB, may also work on U342 of tmRNA	K03177	tRNA pseudouridine55 synthase [EC:5.4.99.25]
CLUSTER607	4	COG2378	Predicted DNA-binding transcriptional regulator YobV, contains HTH and WYL domains	-	-
CLUSTER608	4	COG0768	Cell division protein FtsI, peptidoglycan transpeptidase (Penicillin-binding protein 2)	K08384	stage V sporulation protein D (sporulation-specific penicillin-binding protein)
CLUSTER609	4	-	-	-	-
CLUSTER610	4	COG1131	ABC-type multidrug transport system, ATPase component	K01990	ABC-2 type transport system ATP-binding protein
CLUSTER611	4	COG1396	Transcriptional regulator, contains XRE-family HTH domain	-	-
CLUSTER612	4	-	-	-	-
CLUSTER613	4	COG1959	DNA-binding transcriptional regulator, IscR family	K17472	Rrf2 family transcriptional regulator, cysteine metabolism repressor
CLUSTER614	4	COG1757	Na+/H+ antiporter NhaC/MleN	K03315	Na+:H+ antiporter, NhaC family
CLUSTER615	4	COG4468	Galactose-1-phosphate uridylyltransferase	K00965	UDPglucose--hexose-1-phosphate uridylyltransferase [EC:2.7.7.12]
CLUSTER616	4	-	-	-	-
CLUSTER617	4	COG2138	Sirohydrochlorin ferrochelatase	K03794	sirohydrochlorin ferrochelatase [EC:4.99.1.4]
CLUSTER618	4	COG1038	Pyruvate carboxylase	K01958	pyruvate carboxylase [EC:6.4.1.1]
CLUSTER619	4	COG1249	Dihydrolipoamide dehydrogenase (E3) component of pyruvate/2-oxoglutarate dehydrogenase complex or glutathione oxidoreductase	K00382	dihydrolipoamide dehydrogenase [EC:1.8.1.4]
CLUSTER620	4	COG1380	Putative effector of murein hydrolase LrgA, UPF0299 family	K05338	holin-like protein
CLUSTER621	4	COG2145	Hydroxyethylthiazole kinase, sugar kinase family	K00878	hydroxyethylthiazole kinase [EC:2.7.1.50]
CLUSTER622	4	COG0539	Ribosomal protein S1	K02945	small subunit ribosomal protein S1
CLUSTER623	4	COG2839	Uncharacterized conserved protein YqgC, DUF456 family	K09793	uncharacterized protein
CLUSTER624	4	COG0413	Ketopantoate hydroxymethyltransferase	K00606	3-methyl-2-oxobutanoate hydroxymethyltransferase [EC:2.1.2.11]
CLUSTER625	4	COG0109	Polyprenyltransferase (heme O synthase)	K02257	heme o synthase [EC:2.5.1.141]
CLUSTER626	4	COG1219	ATP-dependent protease Clp, ATPase subunit ClpX	K03544	ATP-dependent Clp protease ATP-binding subunit ClpX
CLUSTER627	4	-	-	-	-
CLUSTER628	4	-	-	-	-
CLUSTER629	4	COG0480	Translation elongation factor EF-G, a GTPase	K02355	elongation factor G
CLUSTER630	4	COG1301	Na+/H+-dicarboxylate symporter	K11102	proton glutamate symport protein
CLUSTER631	4	COG0438	Glycosyltransferase involved in cell wall bisynthesis	K16699	teichuronic acid biosynthesis glycosyltransferase TuaH [EC:2.4.-.-]
CLUSTER632	4	COG1288	Predicted membrane transporter YfcC, affects glyoxylate shunt	-	-
CLUSTER633	4	COG4476	Uncharacterized conserved protein YktA, UPF0223 family	-	-
CLUSTER634	4	COG0095	Lipoate-protein ligase A	K03800	lipoate---protein ligase [EC:6.3.1.20]
CLUSTER635	4	COG5884	Spore coat protein CotN/TasA	K06336	spore coat-associated protein N
CLUSTER636	4	COG0639	Diadenosine tetraphosphatase ApaH/serine/threonine protein phosphatase, PP2A family	-	-
CLUSTER637	4	COG0511	Biotin carboxyl carrier protein	K02160	acetyl-CoA carboxylase biotin carboxyl carrier protein
CLUSTER638	4	COG0398	Uncharacterized membrane protein YdjX, related to fungal oxalate transporter, TVP38/TMEM64 family	-	-
CLUSTER639	4	COG0456	Ribosomal protein S18 acetylase RimI and related acetyltransferases	-	-
CLUSTER640	4	-	-	-	-
CLUSTER641	4	-	-	-	-
CLUSTER642	4	-	-	-	-
CLUSTER643	4	COG1132	ABC-type multidrug transport system, ATPase and permease component	K06147	ATP-binding cassette, subfamily B, bacterial
CLUSTER644	4	-	-	-	-
CLUSTER645	4	COG1109	Phosphomannomutase	K03431	phosphoglucosamine mutase [EC:5.4.2.10]
CLUSTER646	4	COG3125	Heme/copper-type cytochrome/quinol oxidase, subunit 4	K02277	cytochrome c oxidase subunit IV [EC:7.1.1.9]
CLUSTER647	4	COG2270	MFS-type transporter involved in bile tolerance, Atg22 family	K06902	MFS transporter, UMF1 family
CLUSTER648	4	COG0442	Prolyl-tRNA synthetase	K01881	prolyl-tRNA synthetase [EC:6.1.1.15]
CLUSTER649	4	COG1732	Periplasmic glycine betaine/choline-binding (lipo)protein of an ABC-type transport system (osmoprotectant binding protein)	K05845	osmoprotectant transport system substrate-binding protein
CLUSTER650	4	COG0370	Fe2+ transporter FeoB	K04759	ferrous iron transport protein B
CLUSTER651	4	COG5880	Spore coat protein CotE	K06328	spore coat protein E
CLUSTER652	4	COG0471	Di- and tricarboxylate antiporter	K03319	divalent anion:Na+ symporter, DASS family
CLUSTER653	4	COG1621	Sucrose-6-phosphate hydrolase SacC, GH32 family	K01193	beta-fructofuranosidase [EC:3.2.1.26]
CLUSTER654	4	COG0332	3-oxoacyl-[acyl-carrier-protein] synthase III	K00648	3-oxoacyl-[acyl-carrier-protein] synthase III [EC:2.3.1.180]
CLUSTER655	4	COG3705	ATP phosphoribosyltransferase regulatory subunit HisZ	K02502	ATP phosphoribosyltransferase regulatory subunit
CLUSTER656	4	-	-	-	-
CLUSTER657	4	COG1252	NADH dehydrogenase, FAD-containing subunit	K03885	NADH:ubiquinone reductase (H+-translocating) [EC:7.1.1.2]
CLUSTER658	4	COG0501	Zn-dependent protease with chaperone function	K06013	STE24 endopeptidase [EC:3.4.24.84]
CLUSTER659	4	COG0331	Malonyl CoA-acyl carrier protein transacylase	K00645	[acyl-carrier-protein] S-malonyltransferase [EC:2.3.1.39]
CLUSTER660	4	COG2996	Predicted RNA-binding protein YitL, contains S1 domains, virulence factor B family	K00243	uncharacterized protein
CLUSTER661	4	COG4365	Putative cysteine ligase BshC/YllA (bacillithiol biosynthesis)	K22136	bacillithiol synthase
CLUSTER662	4	COG0227	Ribosomal protein L28	K02902	large subunit ribosomal protein L28
CLUSTER663	4	COG4606	ABC-type enterochelin transport system, permease component	K25284	iron-siderophore transport system permease protein
CLUSTER664	4	COG0456	Ribosomal protein S18 acetylase RimI and related acetyltransferases	K02859	riboflavin biosynthesis RibT protein
CLUSTER665	4	COG3583;COG3584	Uncharacterized conserved protein YabE, contains G5 and tandem DUF348 domains;3D (Asp-Asp-Asp) domain, usually in lytic transglycosylases	-	-
CLUSTER666	4	COG1719	Predicted hydrocarbon binding protein, contains 4VR domain	-	-
CLUSTER667	4	COG0778	Nitroreductase	-	-
CLUSTER668	4	COG0445	tRNA U34 5-carboxymethylaminomethyl modifying enzyme MnmG/GidA	K03495	tRNA uridine 5-carboxymethylaminomethyl modification enzyme
CLUSTER669	4	COG3383	Predicted molibdopterin-dependent oxidoreductase YjgC	K00372	assimilatory nitrate reductase catalytic subunit [EC:1.7.99.-]
CLUSTER670	4	COG2747	Negative regulator of flagellin synthesis (anti-sigma28 factor)	K02398	negative regulator of flagellin synthesis FlgM
CLUSTER671	4	COG1419	Flagellar biosynthesis GTPase FlhF	K02404	flagellar biosynthesis protein FlhF
CLUSTER672	4	COG0344	Phospholipid biosynthesis protein PlsY, probable glycerol-3-phosphate acyltransferase	K08591	acyl phosphate:glycerol-3-phosphate acyltransferase [EC:2.3.1.275]
CLUSTER673	4	COG5909	Spore germination protein GerPD (inner spore coat)	K06302	spore germination protein PD
CLUSTER674	4	COG2905;COG1827	Signal-transduction protein containing cAMP-binding, CBS, and nucleotidyltransferase domains;Transcriptional regulator of NAD metabolism, contains HTH and 3H domains	K23774	DeoR family transcriptional regulator, catabolite repression regulator
CLUSTER675	4	COG2217	Cation-transporting P-type ATPase	K01534	Zn2+/Cd2+-exporting ATPase [EC:7.2.2.12 7.2.2.21]
CLUSTER676	4	COG5805	Sporulation sensor histidine kinase A (Stage II sporulation protein SpoIIF/SpoIIJ)	K02491	two-component system, sporulation sensor kinase A [EC:2.7.13.3]
CLUSTER677	4	COG1188	Ribosomal 50S subunit-recycling heat shock protein, contains S4 domain	-	-
CLUSTER678	4	COG0531	Serine transporter YbeC, amino acid:H+ symporter family	K03758	arginine:ornithine antiporter / lysine permease
CLUSTER679	4	-	-	-	-
CLUSTER680	4	COG1349	DNA-binding transcriptional regulator of sugar metabolism, DeoR/GlpR family	K06608	DeoR family transcriptional regulator, myo-inositol catabolism operon repressor
CLUSTER681	4	COG5444	Predicted ribonuclease, toxin component of the YeeF-YezG toxin-antitoxin module	K21493	toxin YxiD [EC:3.1.-.-]
CLUSTER682	4	COG0764	3-hydroxymyristoyl/3-hydroxydecanoyl-(acyl carrier protein) dehydratase	-	-
CLUSTER683	4	-	-	-	-
CLUSTER684	4	COG0031	Cysteine synthase	K17216	cystathionine beta-synthase (O-acetyl-L-serine) [EC:2.5.1.134]
CLUSTER685	4	COG0412	Dienelactone hydrolase	-	-
CLUSTER686	4	COG0679	Predicted permease, AEC (auxin efflux carrier) family	K24180	malate permease and related proteins
CLUSTER687	4	COG1158	Transcription termination factor Rho	K03628	transcription termination factor Rho
CLUSTER688	4	COG0242	Peptide deformylase	K01462	peptide deformylase [EC:3.5.1.88]
CLUSTER689	4	COG2188	DNA-binding transcriptional regulator, GntR family	K24966	GntR family transcriptional regulator, amino sugar utilization regulator
CLUSTER690	4	COG0363	6-phosphogluconolactonase/Glucosamine-6-phosphate isomerase/deaminase	K02564	glucosamine-6-phosphate deaminase [EC:3.5.99.6]
CLUSTER691	4	-	-	-	-
CLUSTER692	4	COG4578	DNA-binding transcriptional regulator of glucitol operon	K02466	glucitol operon activator protein
CLUSTER693	4	COG0609	ABC-type Fe3+-siderophore transport system, permease component	K02015	iron complex transport system permease protein
CLUSTER694	4	COG5908	Spore germination protein GerPC (inner spore coat)	K06301	spore germination protein PC
CLUSTER695	4	COG3715	Phosphotransferase system, mannose/fructose/N-acetylgalactosamine-specific IIC component	K11196	fructose PTS system EIIC component
CLUSTER696	4	COG0340;COG1654	Biotin-(acetyl-CoA carboxylase) ligase;Biotin operon repressor	K03524	BirA family transcriptional regulator, biotin operon repressor / biotin---[acetyl-CoA-carboxylase] ligase [EC:6.3.4.15]
CLUSTER697	4	COG0603	7-cyano-7-deazaguanine synthase (queuosine biosynthesis)	K06920	7-cyano-7-deazaguanine synthase [EC:6.3.4.20]
CLUSTER698	4	-	-	-	-
CLUSTER699	4	-	-	-	-
CLUSTER700	4	COG5298	Predicted metal-dependent carbohydrate esterase YdaL, contains NodB-like catalytic (CE4) domain	-	-
CLUSTER701	4	COG1760	L-serine deaminase	K01752	L-serine dehydratase [EC:4.3.1.17]
CLUSTER702	4	COG2972	Sensor histidine kinase YesM	K07718	two-component system, sensor histidine kinase YesM [EC:2.7.13.3]
CLUSTER703	4	COG2025	Electron transfer flavoprotein, alpha subunit FixB	K03522	electron transfer flavoprotein alpha subunit
CLUSTER704	4	COG1132	ABC-type multidrug transport system, ATPase and permease component	K06147	ATP-binding cassette, subfamily B, bacterial
CLUSTER705	4	COG0385	Predicted Na+-dependent transporter YfeH	K03453	bile acid:Na+ symporter, BASS family
CLUSTER706	4	COG0634	Hypoxanthine-guanine phosphoribosyltransferase	K00760	hypoxanthine phosphoribosyltransferase [EC:2.4.2.8]
CLUSTER707	4	COG0048	Ribosomal protein S12	K02950	small subunit ribosomal protein S12
CLUSTER708	4	COG1561	Uncharacterized stationary-phase protein YicC, UPF0701 family	-	-
CLUSTER709	4	COG0665	Glycine/D-amino acid oxidase (deaminating)	K00285	D-amino-acid dehydrogenase [EC:1.4.5.1]
CLUSTER710	4	COG0229	Peptide methionine sulfoxide reductase MsrB	K07305	peptide-methionine (R)-S-oxide reductase [EC:1.8.4.12]
CLUSTER711	4	COG1175	ABC-type sugar transport system, permease component	K02025	multiple sugar transport system permease protein
CLUSTER712	4	COG1734	RNA polymerase-binding transcription factor DksA	K06204	DnaK suppressor protein
CLUSTER713	4	COG2740	Nucleoid-associated protein YlxR, Predicted RNA-binding, DUF448 family	K07742	uncharacterized protein
CLUSTER714	4	COG5858	Small acid-soluble spore protein SspL	K06429	small acid-soluble spore protein L (minor)
CLUSTER715	4	COG4288	Uncharacterized conserved protein	-	-
CLUSTER716	4	-	-	-	-
CLUSTER717	4	COG0399	dTDP-4-amino-4,6-dideoxygalactose transaminase	K13010	perosamine synthetase [EC:2.6.1.102]
CLUSTER718	4	COG0073	tRNA-binding EMAP/Myf domain	K01874	methionyl-tRNA synthetase [EC:6.1.1.10]
CLUSTER719	4	COG0564	Pseudouridine synthase RluA, 23S rRNA- or tRNA-specific	K06180	23S rRNA pseudouridine1911/1915/1917 synthase [EC:5.4.99.23]
CLUSTER720	4	COG0697	Permease of the drug/metabolite transporter (DMT) superfamily	-	-
CLUSTER721	4	COG1554	Kojibiose phosphorylase YcjT	K00691	maltose phosphorylase [EC:2.4.1.8]
CLUSTER722	4	COG3507	Beta-xylosidase	K00692	levansucrase [EC:2.4.1.10]
CLUSTER723	4	-	-	-	-
CLUSTER724	4	COG3619	Uncharacterized membrane protein YoaK, UPF0700 family	-	-
CLUSTER725	4	COG2761	Predicted dithiol-disulfide isomerase, DsbA/YjbH family (virulence, stress resistance)	-	-
CLUSTER726	4	COG0366	Glycosidase/amylase (phosphorylase)	K01187	alpha-glucosidase [EC:3.2.1.20]
CLUSTER727	4	-	-	-	-
CLUSTER728	4	-	-	-	-
CLUSTER729	4	COG5915	Transglutaminase	K00686	protein-glutamine gamma-glutamyltransferase [EC:2.3.2.13]
CLUSTER730	4	COG0176	Transaldolase/fructose-6-phosphate aldolase	K00616	transaldolase [EC:2.2.1.2]
CLUSTER731	4	COG2897	3-mercaptopyruvate sulfurtransferase SseA, contains two rhodanese domains	K01011	thiosulfate/3-mercaptopyruvate sulfurtransferase [EC:2.8.1.1 2.8.1.2]
CLUSTER732	4	COG1279	Arginine exporter protein ArgO	K06895	L-lysine exporter family protein LysE/ArgO
CLUSTER733	4	COG2076	Multidrug transporter EmrE and related cation transporters	K11741	quaternary ammonium compound-resistance protein SugE
CLUSTER734	4	-	-	-	-
CLUSTER735	4	COG0556	Excinuclease UvrABC helicase subunit UvrB	K03702	excinuclease ABC subunit B
CLUSTER736	4	-	-	-	-
CLUSTER737	4	COG0352	Thiamine monophosphate synthase	K10810	thiazole tautomerase (transcriptional regulator TenI) [EC:5.3.99.10]
CLUSTER738	4	COG2112	Predicted Ser/Thr protein kinase	-	-
CLUSTER739	4	COG1020	EntF, seryl-AMP synthase component of non-ribosomal peptide synthetase	K16121	lichenysin synthetase C
CLUSTER740	4	COG4200	Predicted lantabiotic-exporting membrane pepmease, EfiE/EfiG/ABC2 family	K19310	bacitracin transport system permease protein
CLUSTER741	4	COG1828	Phosphoribosylformylglycinamidine (FGAM) synthase, PurS subunit	K23264	phosphoribosylformylglycinamidine synthase subunit PurS [EC:6.3.5.3]
CLUSTER742	4	COG0347	Nitrogen regulatory protein PII	K04751	nitrogen regulatory protein P-II 1
CLUSTER743	4	COG1622	Heme/copper-type cytochrome/quinol oxidase, subunit 2	K02826	cytochrome aa3-600 menaquinol oxidase subunit II [EC:7.1.1.5]
CLUSTER744	4	COG2086	Electron transfer flavoprotein, alpha and beta subunits	K03521	electron transfer flavoprotein beta subunit
CLUSTER745	4	COG5902	Spore germination receptor GerABC, GerB subunit (amino acid transporter)	K06296	spore germination protein KB
CLUSTER746	4	COG1843	Flagellar hook-capping protein FlgD	K02389	flagellar basal-body rod modification protein FlgD
CLUSTER747	4	COG0726	Peptidoglycan/xylan/chitin deacetylase, PgdA/NodB/CDA1 family	K22278	peptidoglycan-N-acetylglucosamine deacetylase [EC:3.5.1.104]
CLUSTER748	4	-	-	-	-
CLUSTER749	4	COG0240	Glycerol-3-phosphate dehydrogenase	K00057	glycerol-3-phosphate dehydrogenase (NAD(P)+) [EC:1.1.1.94]
CLUSTER750	4	COG1250	3-hydroxyacyl-CoA dehydrogenase	K00074	3-hydroxybutyryl-CoA dehydrogenase [EC:1.1.1.157]
CLUSTER751	4	COG1187	Pseudouridylate synthase RsuA, specific for 16S rRNA U516 and 23S rRNA U2605	K06178	23S rRNA pseudouridine2605 synthase [EC:5.4.99.22]
CLUSTER752	4	COG0456	Ribosomal protein S18 acetylase RimI and related acetyltransferases	K22441	diamine N-acetyltransferase [EC:2.3.1.57]
CLUSTER753	4	COG4862	Negative regulator MecA of genetic competence, sporulation and motility	K16511	adapter protein MecA 1/2
CLUSTER754	4	COG0707	UDP-N-acetylglucosamine:LPS N-acetylglucosamine transferase	K03429	processive 1,2-diacylglycerol beta-glucosyltransferase [EC:2.4.1.315]
CLUSTER755	4	COG2226	Ubiquinone/menaquinone biosynthesis C-methylase UbiE/MenG	-	-
CLUSTER756	4	COG1605	Chorismate mutase	K13853	3-deoxy-7-phosphoheptulonate synthase / chorismate mutase [EC:2.5.1.54 5.4.99.5]
CLUSTER757	4	COG1695	DNA-binding transcriptional regulator, PadR family	K10947	PadR family transcriptional regulator, regulatory protein PadR
CLUSTER758	4	COG0735	Fe2+ or Zn2+ uptake regulation protein Fur/Zur	K09825	Fur family transcriptional regulator, peroxide stress response regulator
CLUSTER759	4	COG2755	Lysophospholipase L1 or related esterase. Includes spore coat protein LipC/YcsK	-	-
CLUSTER760	4	-	-	K11619	lia operon protein LiaI
CLUSTER761	4	COG1788	Acyl CoA:acetate/3-ketoacid CoA transferase, alpha subunit	K01034	acetate CoA/acetoacetate CoA-transferase alpha subunit [EC:2.8.3.8 2.8.3.9]
CLUSTER762	4	COG1070	Sugar (pentulose or hexulose) kinase	K00848	rhamnulokinase [EC:2.7.1.5]
CLUSTER763	4	COG1028	NAD(P)-dependent dehydrogenase, short-chain alcohol dehydrogenase family	K00059	3-oxoacyl-[acyl-carrier protein] reductase [EC:1.1.1.100]
CLUSTER764	4	COG0702	Uncharacterized conserved protein YbjT, contains NAD(P)-binding and DUF2867 domains	K19267	NAD(P)H dehydrogenase (quinone) [EC:1.6.5.2]
CLUSTER765	4	COG1309	DNA-binding protein, AcrR family, includes nucleoid occlusion protein SlmA	-	-
CLUSTER766	4	COG0484	DnaJ-class molecular chaperone with C-terminal Zn finger domain	K03686	molecular chaperone DnaJ
CLUSTER767	4	COG2271	Sugar phosphate permease	-	-
CLUSTER768	4	-	-	-	-
CLUSTER769	4	COG3832	Chalcone/flavanone-binding protein YndB, AHSA1/START/SRPBCC domain	-	-
CLUSTER770	4	COG1028	NAD(P)-dependent dehydrogenase, short-chain alcohol dehydrogenase family	K00068	sorbitol-6-phosphate 2-dehydrogenase [EC:1.1.1.140]
CLUSTER771	4	COG3037	Ascorbate-specific PTS system IIC component UlaA	K03475	ascorbate PTS system EIIC component
CLUSTER772	4	-	-	-	-
CLUSTER773	4	COG1564	Thiamine pyrophosphokinase	K00949	thiamine pyrophosphokinase [EC:2.7.6.2]
CLUSTER774	4	COG1742	Uncharacterized inner membrane protein YnfA, drug/metabolite transporter superfamily	K09771	small multidrug resistance family-3 protein
CLUSTER775	4	COG1386	Chromosome segregation and condensation protein ScpB	K06024	segregation and condensation protein B
CLUSTER776	4	COG1290	Cytochrome b subunit of the bc complex	K03887	menaquinol-cytochrome c reductase cytochrome b subunit
CLUSTER777	4	COG4956	Uncharacterized conserved protein YacL, contains PIN and TRAM domains	-	-
CLUSTER778	4	COG1200	RecG-like helicase	K03655	ATP-dependent DNA helicase RecG [EC:3.6.4.12]
CLUSTER779	4	COG1522	DNA-binding transcriptional regulator, Lrp family	K03719	Lrp/AsnC family transcriptional regulator, leucine-responsive regulatory protein
CLUSTER780	4	COG0632	Holliday junction resolvasome RuvABC DNA-binding subunit	K03550	holliday junction DNA helicase RuvA [EC:3.6.4.12]
CLUSTER781	4	COG0667	Pyridoxal reductase PdxI or related oxidoreductase, aldo/keto reductase family	-	-
CLUSTER782	4	COG2309	Leucyl aminopeptidase (aminopeptidase T)	K19689	aminopeptidase [EC:3.4.11.-]
CLUSTER783	4	COG4948	L-alanine-DL-glutamate epimerase or related enzyme of enolase superfamily	K18983	D-galactarolactone cycloisomerase [EC:5.5.1.27]
CLUSTER784	4	-	-	-	-
CLUSTER785	4	COG0220	tRNA G46 N7-methylase TrmB	K03439	tRNA (guanine-N7-)-methyltransferase [EC:2.1.1.33]
CLUSTER786	4	COG3314	Spore dipicolinate transporter SpoVV/YjiH/YlbJ, contains nucleoside recognition GATE domain	-	-
CLUSTER787	4	COG1620	L-lactate permease	K03303	lactate permease
CLUSTER788	4	COG1387	Histidinol phosphatase or related hydrolase of the PHP family	K02347	DNA polymerase (family X)
CLUSTER789	4	-	-	-	-
CLUSTER790	4	COG0640	DNA-binding transcriptional regulator, ArsR family	K22043	ArsR family transcriptional regulator, zinc-responsive transcriptional repressor
CLUSTER791	4	COG1221	Transcriptional regulators containing an AAA-type ATPase domain and a DNA-binding domain	-	-
CLUSTER792	4	COG2315	Predicted DNA-binding protein with double-wing structural motif, MmcQ/YjbR family	-	-
CLUSTER793	4	COG0178	Excinuclease UvrABC ATPase subunit	K03701	excinuclease ABC subunit A
CLUSTER794	4	COG4641	Spore maturation protein CgeB	-	-
CLUSTER795	4	COG1508	DNA-directed RNA polymerase specialized sigma subunit, sigma54 homolog	K03092	RNA polymerase sigma-54 factor
CLUSTER796	4	COG2814	Predicted arabinose efflux permease AraJ, MFS family	-	-
CLUSTER797	4	COG1559	Endolytic transglycosylase MltG, terminates peptidoglycan polymerization	-	-
CLUSTER798	4	-	-	-	-
CLUSTER799	4	COG3867	Arabinogalactan endo-1,4-beta-galactosidase	K01224	arabinogalactan endo-1,4-beta-galactosidase [EC:3.2.1.89]
CLUSTER800	4	COG1006	Multisubunit Na+/H+ antiporter, MnhC subunit	K05567	multicomponent Na+:H+ antiporter subunit C
CLUSTER801	4	COG1309	DNA-binding protein, AcrR family, includes nucleoid occlusion protein SlmA	-	-
CLUSTER802	4	COG2116	Formate/nitrite transporter FocA, FNT family	K21993	formate transporter
CLUSTER803	4	COG2197	DNA-binding response regulator, NarL/FixJ family, contains REC and HTH domains	K07692	two-component system, NarL family, response regulator DegU
CLUSTER804	4	COG2124;COG0369	Cytochrome P450;Flavoprotein (flavin reductase) subunit CysJ of sulfite and N-hydroxylaminopurine reductases	K14338	cytochrome P450 / NADPH-cytochrome P450 reductase [EC:1.14.14.1 1.6.2.4]
CLUSTER805	4	COG0693	Protein/nucleotide deglycase, PfpI/YajL/DJ-1 family (repair of methylglyoxal-glycated proteins and nucleic acids)	K05520	protease I [EC:3.5.1.124]
CLUSTER806	4	COG4853	YycI protein, regulator of the WalKR two-component signal transduction system	-	-
CLUSTER807	4	COG2378	Predicted DNA-binding transcriptional regulator YobV, contains HTH and WYL domains	-	-
CLUSTER808	4	COG0365	Acyl-coenzyme A synthetase/AMP-(fatty) acid ligase	K01895	acetyl-CoA synthetase [EC:6.2.1.1]
CLUSTER809	4	COG0386	Thioredoxin/glutathione peroxidase BtuE, reduces lipid peroxides	K00432	glutathione peroxidase [EC:1.11.1.9]
CLUSTER810	4	-	-	-	-
CLUSTER811	4	COG0004	Ammonia channel protein AmtB	K03320	ammonium transporter, Amt family
CLUSTER812	4	COG1314	Protein translocase subunit SecG	K03075	preprotein translocase subunit SecG
CLUSTER813	4	COG0398	Uncharacterized membrane protein YdjX, related to fungal oxalate transporter, TVP38/TMEM64 family	-	-
CLUSTER814	4	COG5804	Stage 0 sporulation regulatory phosphatase Spo0E	-	-
CLUSTER815	4	COG5582	Uncharacterized conserved protein YpiB, UPF0302 family	-	-
CLUSTER816	4	COG1521	Pantothenate kinase type III	K03525	type III pantothenate kinase [EC:2.7.1.33]
CLUSTER817	4	COG2172	Anti-sigma regulatory factor (Ser/Thr protein kinase)	K04757	serine/threonine-protein kinase RsbW [EC:2.7.11.1]
CLUSTER818	4	COG1887	CDP-glycerol glycerophosphotransferase, TagB/SpsB family	K09809	CDP-glycerol glycerophosphotransferase [EC:2.7.8.12]
CLUSTER819	4	COG0832	Urease beta subunit	K01429	urease subunit beta [EC:3.5.1.5]
CLUSTER820	4	COG1104	Cysteine desulfurase/Cysteine sulfinate desulfinase IscS or related enzyme, NifS family	K04487	cysteine desulfurase [EC:2.8.1.7]
CLUSTER821	4	COG1070	Sugar (pentulose or hexulose) kinase	-	-
CLUSTER822	4	COG4585	Signal transduction histidine kinase ComP	K07680	two-component system, NarL family, sensor histidine kinase ComP [EC:2.7.13.3]
CLUSTER823	4	COG5892	Spore coat protein YlbD, FlgN family	-	-
CLUSTER824	4	COG0262	Dihydrofolate reductase	K00287	dihydrofolate reductase [EC:1.5.1.3]
CLUSTER825	4	COG0534	Na+-driven multidrug efflux pump, DinF/NorM/MATE family	K03327	multidrug resistance protein, MATE family
CLUSTER826	4	COG4200	Predicted lantabiotic-exporting membrane pepmease, EfiE/EfiG/ABC2 family	K20491	lantibiotic transport system permease protein
CLUSTER827	4	COG2340	Spore germination protein YkwD and related proteins with CAP (CSP/antigen 5/PR1) domain	-	-
CLUSTER828	4	COG0690	Preprotein translocase subunit SecE	K03073	preprotein translocase subunit SecE
CLUSTER829	4	COG1670	Protein N-acetyltransferase, RimJ/RimL family	K00657	diamine N-acetyltransferase [EC:2.3.1.57]
CLUSTER830	4	COG1380	Putative effector of murein hydrolase LrgA, UPF0299 family	K06518	holin-like protein
CLUSTER831	4	COG1064	D-arabinose 1-dehydrogenase, Zn-dependent alcohol dehydrogenase family	K13979	alcohol dehydrogenase (NADP+) [EC:1.1.1.2]
CLUSTER832	4	COG0035	Uracil phosphoribosyltransferase	K00761	uracil phosphoribosyltransferase [EC:2.4.2.9]
CLUSTER833	4	COG0001	Glutamate-1-semialdehyde aminotransferase	K01845	glutamate-1-semialdehyde 2,1-aminomutase [EC:5.4.3.8]
CLUSTER834	4	COG4188	Predicted dienelactone hydrolase	-	-
CLUSTER835	4	COG3540	Phosphodiesterase/alkaline phosphatase D	K01113	alkaline phosphatase D [EC:3.1.3.1]
CLUSTER836	4	COG4988	ABC-type transport system involved in cytochrome bd biosynthesis, ATPase and permease components	K16013	ATP-binding cassette, subfamily C, bacterial CydD
CLUSTER837	4	-	-	-	-
CLUSTER838	4	COG0045	Succinyl-CoA synthetase, beta subunit	K01903	succinyl-CoA synthetase beta subunit [EC:6.2.1.5]
CLUSTER839	4	COG1388	LysM repeat	-	-
CLUSTER840	4	COG1094;COG1418	rRNA processing protein Krr1/Pno1, contains KH domain;HD superfamily phosphodieaserase, includes HD domain of RNase Y	K18682	ribonucrease Y [EC:3.1.-.-]
CLUSTER841	4	COG1283	Na+/phosphate symporter	K03324	phosphate:Na+ symporter
CLUSTER842	4	COG3718	5-deoxy-D-glucuronate isomerase	K03337	5-deoxy-glucuronate isomerase [EC:5.3.1.30]
CLUSTER843	4	COG1129	ABC-type sugar transport system, ATPase component	K10441	ribose transport system ATP-binding protein [EC:7.5.2.7]
CLUSTER844	4	COG1190	Lysyl-tRNA synthetase (class II)	K04567	lysyl-tRNA synthetase, class II [EC:6.1.1.6]
CLUSTER845	4	COG4668	Mannitol/fructose-specific phosphotransferase system, IIA domain	K02798	mannitol PTS system EIIA component [EC:2.7.1.197]
CLUSTER846	4	COG1227	Inorganic pyrophosphatase/exopolyphosphatase	K15986	manganese-dependent inorganic pyrophosphatase [EC:3.6.1.1]
CLUSTER847	4	COG4122	tRNA 5-hydroxyU34 O-methylase TrmR/YrrM	-	-
CLUSTER848	4	COG2176;COG1199	DNA polymerase III, alpha subunit (gram-positive type);Rad3-related DNA helicase DinG	K03722	ATP-dependent DNA helicase DinG [EC:3.6.4.12]
CLUSTER849	4	-	-	-	-
CLUSTER850	4	COG1393	Arsenate reductase or related protein, glutaredoxin family	K16509	regulatory protein spx
CLUSTER851	4	COG2226	Ubiquinone/menaquinone biosynthesis C-methylase UbiE/MenG	K15256	tRNA (cmo5U34)-methyltransferase [EC:2.1.1.-]
CLUSTER852	4	COG0463	Glycosyltransferase involved in cell wall bisynthesis	K20534	polyisoprenyl-phosphate glycosyltransferase [EC:2.4.-.-]
CLUSTER853	4	COG0679	Predicted permease, AEC (auxin efflux carrier) family	K13936	malonate transporter and related proteins
CLUSTER854	4	COG5838	Stage V sporulation protein SpoVAEA, mutants lead to the production of immature spores	K06407	stage V sporulation protein AE
CLUSTER855	4	COG1073	Fermentation-respiration switch esterase FrsA, DUF1100 family	K06889	uncharacterized protein
CLUSTER856	4	-	-	-	-
CLUSTER857	4	COG0826	23S rRNA C2501 and tRNA U34 5'-hydroxylation protein RlhA/YrrN/YrrO, U32 peptidase family	K08303	U32 family peptidase [EC:3.4.-.-]
CLUSTER858	4	COG0169	Shikimate 5-dehydrogenase	K00014	shikimate dehydrogenase [EC:1.1.1.25]
CLUSTER859	4	COG0648	Endonuclease IV	K01151	deoxyribonuclease IV [EC:3.1.21.2]
CLUSTER860	4	COG3325	Chitinase, GH18 family	K01183	chitinase [EC:3.2.1.14]
CLUSTER861	4	COG0139	Phosphoribosyl-AMP cyclohydrolase	K11755	phosphoribosyl-AMP cyclohydrolase / phosphoribosyl-ATP pyrophosphohydrolase [EC:3.5.4.19 3.6.1.31]
CLUSTER862	4	COG5577	Spore coat protein CotF	K06329	spore coat protein F
CLUSTER863	4	COG2264	Ribosomal protein L11 methylase PrmA	K02687	ribosomal protein L11 methyltransferase [EC:2.1.1.-]
CLUSTER864	4	-	-	-	-
CLUSTER865	4	COG2271	Sugar phosphate permease	K05548	MFS transporter, AAHS family, benzoate transport protein
CLUSTER866	4	-	-	-	-
CLUSTER867	4	-	-	-	-
CLUSTER868	4	COG3318	Uncharacterized conserved protein YecA, UPF0149 family, contains C-terminal Zn-binding SEC-C motif	K07039	uncharacterized protein
CLUSTER869	4	COG1846	DNA-binding transcriptional regulator, MarR family	-	-
CLUSTER870	4	-	-	-	-
CLUSTER871	4	-	-	-	-
CLUSTER872	4	COG1793	ATP-dependent DNA ligase	K01971	bifunctional non-homologous end joining protein LigD [EC:6.5.1.1]
CLUSTER873	4	COG5890	Uncharacterized sporulation proteins YjcM and YhbB, contain C-terminal amidase domain	-	-
CLUSTER874	4	-	-	-	-
CLUSTER875	4	COG1874	Beta-galactosidase GanA	K01190	beta-galactosidase [EC:3.2.1.23]
CLUSTER876	4	COG1183	Phosphatidylserine synthase	K17103	CDP-diacylglycerol---serine O-phosphatidyltransferase [EC:2.7.8.8]
CLUSTER877	4	COG0367	Asparagine synthetase B (glutamine-hydrolyzing)	K01953	asparagine synthase (glutamine-hydrolysing) [EC:6.3.5.4]
CLUSTER878	4	COG0778	Nitroreductase	-	-
CLUSTER879	4	COG3599	Cell division septum initiation protein DivIVA, interacts with FtsZ and MinD	-	-
CLUSTER880	4	COG1426	Cytoskeletal protein RodZ, contains Xre-like HTH and DUF4115 domains	-	-
CLUSTER881	4	-	-	-	-
CLUSTER882	4	COG2172	Anti-sigma regulatory factor (Ser/Thr protein kinase)	K17752	serine/threonine-protein kinase RsbT [EC:2.7.11.1]
CLUSTER883	4	COG1092	23S rRNA G2069 N7-methylase RlmK or C1962 C5-methylase RlmI	K06969	23S rRNA (cytosine1962-C5)-methyltransferase [EC:2.1.1.191]
CLUSTER884	4	COG1925	HPr or related phosphotransfer protein	K02784	phosphocarrier protein HPr
CLUSTER885	4	COG5849	SigmaK checkpoint regulator BofC (Bypass-of-forespore protein C)	K06318	forespore regulator of the sigma-K checkpoint
CLUSTER886	4	COG0593	Chromosomal replication initiation ATPase DnaA	K02313	chromosomal replication initiator protein
CLUSTER887	4	COG0154	Asp-tRNAAsn/Glu-tRNAGln amidotransferase A subunit or related amidase	K01426	amidase [EC:3.5.1.4]
CLUSTER888	4	COG3717	5-keto 4-deoxyuronate isomerase	K01815	4-deoxy-L-threo-5-hexosulose-uronate ketol-isomerase [EC:5.3.1.17]
CLUSTER889	4	-	-	K02526	2-keto-3-deoxygluconate permease
CLUSTER890	4	COG2445	Uncharacterized HEPN domain protein YutE, UPF0331/DUF86 family	-	-
CLUSTER891	4	COG1982	Arginine/lysine/ornithine decarboxylase	-	-
CLUSTER892	4	-	-	-	-
CLUSTER893	4	COG5919	Uncharacterized sporulation protein YodI	-	-
CLUSTER894	4	COG1225	Peroxiredoxin	-	-
CLUSTER895	4	COG4473	Predicted ABC-type exoprotein transport system, permease component	K25157	ABC-2 type transport system permease protein
CLUSTER896	4	COG1494	Fructose-1,6-bisphosphatase/sedoheptulose 1,7-bisphosphatase or related protein	K02446	fructose-1,6-bisphosphatase II [EC:3.1.3.11]
CLUSTER897	4	COG5841	Stage V sporulation protein SpoVB/SpoIIIF, required for spore cortex synthesis	K06409	stage V sporulation protein B
CLUSTER898	4	COG0726	Peptidoglycan/xylan/chitin deacetylase, PgdA/NodB/CDA1 family	K01567	peptidoglycan-N-acetylmuramic acid deacetylase [EC:3.5.1.-]
CLUSTER899	4	COG0498	Threonine synthase	K01733	threonine synthase [EC:4.2.3.1]
CLUSTER900	4	COG0772	Peptodoglycan polymerase FtsW/RodA/SpoVE	K03588	cell division protein FtsW
CLUSTER901	4	COG2211	Na+/melibiose symporter or related transporter	K03292	glycoside/pentoside/hexuronide:cation symporter, GPH family
CLUSTER902	4	COG1028	NAD(P)-dependent dehydrogenase, short-chain alcohol dehydrogenase family	-	-
CLUSTER903	4	COG4401	Chorismate mutase AroH	K06208	chorismate mutase [EC:5.4.99.5]
CLUSTER904	4	COG0181	Porphobilinogen deaminase	K01749	hydroxymethylbilane synthase [EC:2.5.1.61]
CLUSTER905	4	COG1234	Ribonuclease BN, tRNA processing enzyme	-	-
CLUSTER906	4	COG4290	Guanyl-specific ribonuclease Sa	-	-
CLUSTER907	4	COG2116	Formate/nitrite transporter FocA, FNT family	K02598	nitrite transporter
CLUSTER908	4	COG0583	DNA-binding transcriptional regulator, LysR family	-	-
CLUSTER909	4	COG0667	Pyridoxal reductase PdxI or related oxidoreductase, aldo/keto reductase family	K19265	L-glyceraldehyde 3-phosphate reductase [EC:1.1.1.-]
CLUSTER910	4	COG1716	Forkhead associated (FHA) domain, binds pSer, pThr, pTyr	-	-
CLUSTER911	4	COG2359	Stage V sporulation protein SpoVS, predicted DNA-binding, AlbA superfamily	K06416	stage V sporulation protein S
CLUSTER912	4	COG2317	Zn-dependent carboxypeptidase, M32 family	K01299	carboxypeptidase Taq [EC:3.4.17.19]
CLUSTER913	4	COG0735	Fe2+ or Zn2+ uptake regulation protein Fur/Zur	K09825	Fur family transcriptional regulator, peroxide stress response regulator
CLUSTER914	4	COG1131	ABC-type multidrug transport system, ATPase component	K01990	ABC-2 type transport system ATP-binding protein
CLUSTER915	4	COG0190	5,10-methylene-tetrahydrofolate dehydrogenase/Methenyl tetrahydrofolate cyclohydrolase	K01491	methylenetetrahydrofolate dehydrogenase (NADP+) / methenyltetrahydrofolate cyclohydrolase [EC:1.5.1.5 3.5.4.9]
CLUSTER916	4	COG1321	Mn-dependent transcriptional regulator MntR, DtxR family	-	-
CLUSTER917	4	COG2265	tRNA/tmRNA/rRNA uracil-C5-methylase, TrmA/RlmC/RlmD family	K03215	23S rRNA (uracil1939-C5)-methyltransferase [EC:2.1.1.190]
CLUSTER918	4	COG4479	Uncharacterized conserved protein YozE, UPF0346 family	-	-
CLUSTER919	4	COG0076	Glutamate or tyrosine decarboxylase or a related PLP-dependent protein	-	-
CLUSTER920	4	COG0202	DNA-directed RNA polymerase, alpha subunit/40 kD subunit	K03040	DNA-directed RNA polymerase subunit alpha [EC:2.7.7.6]
CLUSTER921	4	COG1853	FMN reductase RutF, DIM6/NTAB family	-	-
CLUSTER922	4	COG1647	Esterase/lipase	K03928	carboxylesterase [EC:3.1.1.1]
CLUSTER923	4	COG0584	Glycerophosphoryl diester phosphodiesterase	K01126	glycerophosphoryl diester phosphodiesterase [EC:3.1.4.46]
CLUSTER924	4	COG2866	Murein tripeptide amidase MpaA	-	-
CLUSTER925	4	COG0739	Murein DD-endopeptidase MepM and murein hydrolase activator NlpD, contains LysM domain	K21472	peptidoglycan LD-endopeptidase LytH [EC:3.4.-.-]
CLUSTER926	4	COG1131	ABC-type multidrug transport system, ATPase component	K01990	ABC-2 type transport system ATP-binding protein
CLUSTER927	4	COG0157	Nicotinate-nucleotide pyrophosphorylase	K00767	nicotinate-nucleotide pyrophosphorylase (carboxylating) [EC:2.4.2.19]
CLUSTER928	4	COG5578	Uncharacterized membrane protein YesL	-	-
CLUSTER929	4	COG0561	Hydroxymethylpyrimidine pyrophosphatase and other HAD family phosphatases	K21064	5-amino-6-(5-phospho-D-ribitylamino)uracil phosphatase [EC:3.1.3.104]
CLUSTER930	4	COG5902	Spore germination receptor GerABC, GerB subunit (amino acid transporter)	-	-
CLUSTER931	4	COG0840	Methyl-accepting chemotaxis protein (MCP)	K03406	methyl-accepting chemotaxis protein
CLUSTER932	4	-	-	-	-
CLUSTER933	4	COG0249	DNA mismatch repair ATPase MutS	K03555	DNA mismatch repair protein MutS
CLUSTER934	4	COG4392	Branched-chain amino acid transport protein	-	-
CLUSTER935	4	COG1273	Non-homologous end joining protein Ku, dsDNA break repair	K10979	DNA end-binding protein Ku
CLUSTER936	4	COG3118	Chaperedoxin CnoX, contains thioredoxin-like and TPR-like domains, YbbN/TrxSC family	-	-
CLUSTER937	4	COG0337	3-dehydroquinate synthetase	K01735	3-dehydroquinate synthase [EC:4.2.3.4]
CLUSTER938	4	COG1846	DNA-binding transcriptional regulator, MarR family	-	-
CLUSTER939	4	COG0438	Glycosyltransferase involved in cell wall bisynthesis	K19422	glycosyltransferase EpsD [EC:2.4.-.-]
CLUSTER940	4	COG2076	Multidrug transporter EmrE and related cation transporters	K18924	paired small multidrug resistance pump
CLUSTER941	4	-	-	-	-
CLUSTER942	4	-	-	-	-
CLUSTER943	4	COG1476	DNA-binding transcriptional regulator, XRE-family HTH domain	-	-
CLUSTER944	4	COG1024	Enoyl-CoA hydratase/carnithine racemase	-	-
CLUSTER945	4	COG4469	Competence protein CoiA, contains predicted nuclease domain	K06198	competence protein CoiA
CLUSTER946	4	COG0131	Imidazoleglycerol phosphate dehydratase HisB	K01693	imidazoleglycerol-phosphate dehydratase [EC:4.2.1.19]
CLUSTER947	4	COG2076	Multidrug transporter EmrE and related cation transporters	K18924	paired small multidrug resistance pump
CLUSTER948	4	COG0614	ABC-type Fe3+-hydroxamate transport system, periplasmic component	K25308	ferric hydroxamate/heme transport system substrate-binding protein
CLUSTER949	4	COG1846	DNA-binding transcriptional regulator, MarR family	-	-
CLUSTER950	4	-	-	-	-
CLUSTER951	4	-	-	K06285	transcription attenuation protein (tryptophan RNA-binding attenuator protein)
CLUSTER952	4	COG1051	ADP-ribose pyrophosphatase YjhB, NUDIX family	K03574	8-oxo-dGTP diphosphatase [EC:3.6.1.55]
CLUSTER953	4	COG0823	Periplasmic component TolB of the Tol biopolymer transport system	-	-
CLUSTER954	4	COG1408	Predicted phosphohydrolase, MPP superfamily	-	-
CLUSTER955	4	COG1309	DNA-binding protein, AcrR family, includes nucleoid occlusion protein SlmA	K16137	TetR/AcrR family transcriptional regulator, transcriptional repressor for nem operon
CLUSTER956	4	COG2707	Uncharacterized membrane protein, DUF441 family	-	-
CLUSTER957	4	-	-	-	-
CLUSTER958	4	COG5828	Stage III sporulation protein SpoIIIAG, component of the engulfment complex	K06396	stage III sporulation protein AG
CLUSTER959	4	COG0261	Ribosomal protein L21	K02888	large subunit ribosomal protein L21
CLUSTER960	4	COG1802	DNA-binding transcriptional regulator, GntR family	-	-
CLUSTER961	4	COG1664	Cytoskeletal protein CcmA, bactofilin family	-	-
CLUSTER962	4	COG0623	Enoyl-[acyl-carrier-protein] reductase FabI	K00208	enoyl-[acyl-carrier protein] reductase I [EC:1.3.1.9 1.3.1.10]
CLUSTER963	4	COG1021	EntE, 2,3-dihydroxybenzoate-AMP synthase component of non-ribosomal peptide synthetase	K02363	2,3-dihydroxybenzoate---[aryl-carrier protein] ligase [EC:6.3.2.14 6.2.1.71]
CLUSTER964	4	COG0236	Acyl carrier protein	K02078	acyl carrier protein
CLUSTER965	4	COG5901	Spore germination receptor GerABC, GerA subunit (L-alanine receptor)	K06310	spore germination protein
CLUSTER966	4	COG0628	Predicted PurR-regulated permease PerM	-	-
CLUSTER967	4	-	-	-	-
CLUSTER968	4	COG3773	Cell wall hydrolase CwlJ, involved in spore germination	K01449	N-acetylmuramoyl-L-alanine amidase [EC:3.5.1.28]
CLUSTER969	4	COG0479	Succinate dehydrogenase/fumarate reductase, Fe-S protein subunit	K00240	succinate dehydrogenase / fumarate reductase, iron-sulfur subunit [EC:1.3.5.1 1.3.5.4]
CLUSTER970	4	COG1670	Protein N-acetyltransferase, RimJ/RimL family	-	-
CLUSTER971	4	COG2059	Chromate transport protein ChrA	K07240	chromate transporter
CLUSTER972	4	COG1048	Aconitase A	K01681	aconitate hydratase [EC:4.2.1.3]
CLUSTER973	4	COG0535	Radical SAM superfamily maturase, SkfB/NifB/PqqE family	-	-
CLUSTER974	4	COG3557	Uncharacterized conserved protein associated with RNAses G and E, UPF0374/DUF402 family	K07586	uncharacterized protein
CLUSTER975	4	-	-	-	-
CLUSTER976	4	COG1291	Flagellar motor component MotA	K02556	chemotaxis protein MotA
CLUSTER977	4	COG1078	HD superfamily phosphohydrolase	K06885	uncharacterized protein
CLUSTER978	4	COG2608	Copper chaperone CopZ	K07213	copper chaperone
CLUSTER979	4	COG2364	Uncharacterized membrane protein YczE	K07149	uncharacterized protein
CLUSTER980	4	-	-	-	-
CLUSTER982	4	COG2032	Cu/Zn superoxide dismutase	K04565	superoxide dismutase, Cu-Zn family [EC:1.15.1.1]
CLUSTER983	4	COG1807	PMT family glycosyltransferase ArnT/Agl22, involved in glycosylation of proteins and lipid IVA	-	-
CLUSTER984	4	COG1807	PMT family glycosyltransferase ArnT/Agl22, involved in glycosylation of proteins and lipid IVA	-	-
CLUSTER985	4	COG1396	Transcriptional regulator, contains XRE-family HTH domain	-	-
CLUSTER986	4	COG1346	Putative effector of murein hydrolase	K05339	holin-like protein LrgB
CLUSTER987	4	COG2759	Formyltetrahydrofolate synthetase	K01938	formate--tetrahydrofolate ligase [EC:6.3.4.3]
CLUSTER988	4	COG0801	7,8-dihydro-6-hydroxymethylpterin pyrophosphokinase (folate biosynthesis)	K00950	2-amino-4-hydroxy-6-hydroxymethyldihydropteridine diphosphokinase [EC:2.7.6.3]
CLUSTER989	4	COG0141	Histidinol dehydrogenase	K00013	histidinol dehydrogenase [EC:1.1.1.23]
CLUSTER990	4	COG5830	Stage III sporulation protein SpoIIID, transcriptional regulator of sigma-E- and sigma-K-dependent genes	K06283	putative DeoR family transcriptional regulator, stage III sporulation protein D
CLUSTER991	4	COG0747	ABC-type transport system, periplasmic component	K02035	peptide/nickel transport system substrate-binding protein
CLUSTER992	4	COG1846	DNA-binding transcriptional regulator, MarR family	K23775	MarR family transcriptional regulator, organic hydroperoxide resistance regulator
CLUSTER993	4	COG0789	DNA-binding transcriptional regulator, MerR family	-	-
CLUSTER994	4	COG0201	Preprotein translocase subunit SecY	K03076	preprotein translocase subunit SecY
CLUSTER995	4	COG1556	L-lactate utilization protein LutC, contains LUD domain	K00782	L-lactate dehydrogenase complex protein LldG
CLUSTER996	4	COG1404	Serine protease, subtilisin family	K13274	cell wall-associated protease [EC:3.4.21.-]
CLUSTER997	4	-	-	-	-
CLUSTER998	4	COG3257	Ureidoglycine aminohydrolase	K14977	(S)-ureidoglycine aminohydrolase [EC:3.5.3.26]
CLUSTER999	4	COG2197	DNA-binding response regulator, NarL/FixJ family, contains REC and HTH domains	-	-
CLUSTER1000	4	COG0191	Fructose/tagatose bisphosphate aldolase	K08302	tagatose 1,6-diphosphate aldolase GatY/KbaY [EC:4.1.2.40]
CLUSTER1001	4	COG0745	DNA-binding response regulator, OmpR family, contains REC and winged-helix (wHTH) domain	K07658	two-component system, OmpR family, alkaline phosphatase synthesis response regulator PhoP
CLUSTER1002	4	COG0508	Pyruvate/2-oxoglutarate dehydrogenase complex, dihydrolipoamide acyltransferase (E2) component	K00627	pyruvate dehydrogenase E2 component (dihydrolipoamide acetyltransferase) [EC:2.3.1.12]
CLUSTER1003	4	COG2141	Flavin-dependent oxidoreductase, luciferase family (includes alkanesulfonate monooxygenase SsuD and methylene tetrahydromethanopterin reductase)	-	-
CLUSTER1004	4	COG1240	vWFA (von Willebrand factor type A) domain of Mg and Co chelatases	K07114	Ca-activated chloride channel homolog
CLUSTER1005	4	COG5874	Uncharacterized sporulation protein YtxC	-	-
CLUSTER1006	4	-	-	-	-
CLUSTER1007	4	COG0086	DNA-directed RNA polymerase, beta' subunit/160 kD subunit	K03046	DNA-directed RNA polymerase subunit beta' [EC:2.7.7.6]
CLUSTER1008	4	-	-	-	-
CLUSTER1009	4	COG0491;COG0607	Glyoxylase or a related metal-dependent hydrolase, beta-lactamase superfamily II;Rhodanese-related sulfurtransferase	K01069	hydroxyacylglutathione hydrolase [EC:3.1.2.6]
CLUSTER1010	4	COG2124	Cytochrome P450	K17474	pulcherriminic acid synthase [EC:1.14.15.13]
CLUSTER1011	4	-	-	-	-
CLUSTER1012	4	COG0612	Predicted Zn-dependent peptidase, M16 family	-	-
CLUSTER1013	4	COG2267	Lysophospholipase, alpha-beta hydrolase superfamily	K01048	lysophospholipase [EC:3.1.1.5]
CLUSTER1014	4	COG5831	Stage IV sporulation protein SpoIVA, required for spore cortex formation and coat assembly	K06398	stage IV sporulation protein A
CLUSTER1015	4	COG1670	Protein N-acetyltransferase, RimJ/RimL family	-	-
CLUSTER1016	4	COG0533	tRNA A37 threonylcarbamoyltransferase TsaD	K01409	N6-L-threonylcarbamoyladenine synthase [EC:2.3.1.234]
CLUSTER1017	4	COG1268	Biotin transporter BioY	K03523	biotin transport system substrate-specific component
CLUSTER1018	4	COG1418	HD superfamily phosphodieaserase, includes HD domain of RNase Y	K06950	uncharacterized protein
CLUSTER1019	4	COG3822	D-lyxose ketol-isomerase	K09988	D-lyxose ketol-isomerase [EC:5.3.1.15]
CLUSTER1020	4	COG0283	Cytidylate kinase	K00945	CMP/dCMP kinase [EC:2.7.4.25]
CLUSTER1021	4	COG0612	Predicted Zn-dependent peptidase, M16 family	-	-
CLUSTER1022	4	COG1075	Triacylglycerol esterase/lipase EstA, alpha/beta hydrolase fold	-	-
CLUSTER1023	4	COG0247	Fe-S cluster-containing oxidoreductase, includes glycolate oxidase subunit GlcF	K11473	glycolate oxidase iron-sulfur subunit
CLUSTER1024	4	COG0049	Ribosomal protein S7	K02992	small subunit ribosomal protein S7
CLUSTER1025	4	COG2755	Lysophospholipase L1 or related esterase. Includes spore coat protein LipC/YcsK	-	-
CLUSTER1026	4	COG0726	Peptidoglycan/xylan/chitin deacetylase, PgdA/NodB/CDA1 family	-	-
CLUSTER1027	4	COG0456	Ribosomal protein S18 acetylase RimI and related acetyltransferases	-	-
CLUSTER1028	4	COG0604	NADPH:quinone reductase or related Zn-dependent oxidoreductase	K13955	zinc-binding alcohol dehydrogenase/oxidoreductase
CLUSTER1029	4	-	-	-	-
CLUSTER1030	4	COG2271	Sugar phosphate permease	K03535	MFS transporter, ACS family, glucarate transporter
CLUSTER1031	4	-	-	-	-
CLUSTER1032	4	COG1826	Twin-arginine protein secretion pathway components TatA and TatB	K03116	sec-independent protein translocase protein TatA
CLUSTER1033	4	COG0617	tRNA nucleotidyltransferase/poly(A) polymerase	K00974	tRNA nucleotidyltransferase (CCA-adding enzyme) [EC:2.7.7.72 3.1.3.- 3.1.4.-]
CLUSTER1034	4	COG0607	Rhodanese-related sulfurtransferase	-	-
CLUSTER1035	4	COG1028	NAD(P)-dependent dehydrogenase, short-chain alcohol dehydrogenase family	K00059	3-oxoacyl-[acyl-carrier protein] reductase [EC:1.1.1.100]
CLUSTER1036	4	COG0183	Acetyl-CoA acetyltransferase	K00632	acetyl-CoA acyltransferase [EC:2.3.1.16]
CLUSTER1037	4	COG0184	Ribosomal protein S15P/S13E	K02956	small subunit ribosomal protein S15
CLUSTER1038	4	COG0618	nanoRNase/pAp phosphatase, hydrolyzes c-di-AMP and oligoRNAs	K06881	bifunctional oligoribonuclease and PAP phosphatase NrnA [EC:3.1.3.7 3.1.13.3]
CLUSTER1039	4	COG3493	Na+/citrate or Na+/malate symporter	K11616	malate:Na+ symporter
CLUSTER1040	4	COG0765	ABC-type amino acid transport system, permease component	K10009	L-cystine transport system permease protein
CLUSTER1041	4	-	-	-	-
CLUSTER1042	4	COG2323	Uncharacterized membrane protein YcaP, DUF421 family	-	-
CLUSTER1043	4	COG2350	YciI superfamily enzyme, includes 5-CHQ dehydrochlorinase, contains active-site pHis	-	-
CLUSTER1044	4	COG0235;COG4359	5-methylthioribulose/5-deoxyribulose/Fuculose 1-phosphate aldolase (methionine salvage, sugar degradation);2-hydroxy-3-keto-5-methylthiopentenyl-1-phosphate phosphatase (methionine salvage)	K08966	2-hydroxy-3-keto-5-methylthiopentenyl-1-phosphate phosphatase [EC:3.1.3.87]
CLUSTER1045	4	-	-	-	-
CLUSTER1046	4	COG0775	Nucleoside phosphorylase/nucleosidase, includes 5'-methylthioadenosine/S-adenosylhomocysteine nucleosidase MtnN and futalosine hydrolase MqnB	K01243	adenosylhomocysteine nucleosidase [EC:3.2.2.9]
CLUSTER1047	4	COG1774	Cell fate regulator YaaT, PSP1 superfamily (controls sporulation, competence, biofilm development)	-	-
CLUSTER1048	4	COG5807	Sporulation sensor histidine kinase C	K07698	two-component system, sporulation sensor kinase C [EC:2.7.13.3]
CLUSTER1049	4	COG1116	ABC-type nitrate/sulfonate/bicarbonate transport system, ATPase component	K15555	sulfonate transport system ATP-binding protein [EC:7.6.2.14]
CLUSTER1050	4	COG5885	Spore coat protein CotO/YjbX	-	-
CLUSTER1051	4	COG0596	2-succinyl-6-hydroxy-2,4-cyclohexadiene-1-carboxylate synthase MenH and related esterases, alpha/beta hydrolase fold	-	-
CLUSTER1052	4	COG0117	Riboflavin biosynthesis protein RibD, pyrimidine deaminase domain	K11752	diaminohydroxyphosphoribosylaminopyrimidine deaminase / 5-amino-6-(5-phosphoribosylamino)uracil reductase [EC:3.5.4.26 1.1.1.193]
CLUSTER1053	4	-	-	-	-
CLUSTER1054	4	COG0104	Adenylosuccinate synthase	K01939	adenylosuccinate synthase [EC:6.3.4.4]
CLUSTER1055	4	COG0447	1,4-Dihydroxy-2-naphthoyl-CoA synthase	K01661	naphthoate synthase [EC:4.1.3.36]
CLUSTER1056	4	COG1263	Phosphotransferase system IIC components, glucose/maltose/N-acetylglucosamine-specific	K02750	alpha-glucoside PTS system EIICB component [EC:2.7.1.208 2.7.1.-]
CLUSTER1057	4	COG5922	Uncharacterized sporulation protein YqhG	-	-
CLUSTER1058	4	COG1040	DNA utilization protein ComFC/GntX, contains phosphoribosyltransferase domain	K02242	competence protein ComFC
CLUSTER1059	4	COG0589	Nucleotide-binding universal stress protein, UspA family	-	-
CLUSTER1060	4	COG0611	Thiamine monophosphate kinase	K00946	thiamine-monophosphate kinase [EC:2.7.4.16]
CLUSTER1061	4	-	-	-	-
CLUSTER1062	4	COG1191	DNA-directed RNA polymerase specialized sigma subunit	K03090	RNA polymerase sigma-B factor
CLUSTER1063	4	COG1609	DNA-binding transcriptional regulator, LacI/PurR family	K02529	LacI family transcriptional regulator
CLUSTER1064	4	COG2225	Malate synthase	K01638	malate synthase [EC:2.3.3.9]
CLUSTER1065	4	COG0456	Ribosomal protein S18 acetylase RimI and related acetyltransferases	-	-
CLUSTER1066	4	COG2382	Enterochelin esterase or related enzyme	-	-
CLUSTER1067	4	COG1457	Purine-cytosine permease or related protein	K10974	cytosine permease
CLUSTER1068	4	COG0791	Cell wall-associated hydrolase, NlpC_P60 family	K21471	peptidoglycan DL-endopeptidase CwlO [EC:3.4.-.-]
CLUSTER1069	4	-	-	-	-
CLUSTER1070	4	COG0513	Superfamily II DNA and RNA helicase	K18692	ATP-dependent RNA helicase CshB [EC:3.6.4.13]
CLUSTER1071	4	COG0055	FoF1-type ATP synthase, beta subunit	K02112	F-type H+/Na+-transporting ATPase subunit beta [EC:7.1.2.2 7.2.2.1]
CLUSTER1072	4	COG1758	DNA-directed RNA polymerase, subunit K/omega	K03060	DNA-directed RNA polymerase subunit omega [EC:2.7.7.6]
CLUSTER1073	4	COG3728	Phage terminase, small subunit	K07474	phage terminase small subunit
CLUSTER1074	4	COG0673	Predicted dehydrogenase	K22230	scyllo-inositol 2-dehydrogenase (NADP+) [EC:1.1.1.-]
CLUSTER1075	4	COG1760;COG0111	L-serine deaminase;Phosphoglycerate dehydrogenase or related dehydrogenase	K00058	D-3-phosphoglycerate dehydrogenase / 2-oxoglutarate reductase [EC:1.1.1.95 1.1.1.399]
CLUSTER1076	4	COG1285	Magnesium uptake protein YhiD/SapB, involved in acid resistance	K07507	putative Mg2+ transporter-C (MgtC) family protein
CLUSTER1077	4	COG0064	Asp-tRNAAsn/Glu-tRNAGln amidotransferase B subunit	K02434	aspartyl-tRNA(Asn)/glutamyl-tRNA(Gln) amidotransferase subunit B [EC:6.3.5.6 6.3.5.7]
CLUSTER1078	4	-	-	-	-
CLUSTER1079	4	COG2508	DNA-binding transcriptional regulator, PucR/PutR family	K23253	PucR family transcriptional regulator, proline-responsive transcriptional activator
CLUSTER1080	4	COG1396	Transcriptional regulator, contains XRE-family HTH domain	K23779	XRE family transcriptional regulator, regulator of sulfur utilization
CLUSTER1081	4	COG4086	Uncharacterized conserved protein YpuA, DUF1002 family	-	-
CLUSTER1082	4	COG0508	Pyruvate/2-oxoglutarate dehydrogenase complex, dihydrolipoamide acyltransferase (E2) component	K09699	2-oxoisovalerate dehydrogenase E2 component (dihydrolipoyl transacylase) [EC:2.3.1.168]
CLUSTER1083	4	COG1396	Transcriptional regulator, contains XRE-family HTH domain	-	-
CLUSTER1084	4	COG1246	N-acetylglutamate synthase or related acetyltransferase, GNAT family	K06323	spore maturation protein CgeE
CLUSTER1085	4	COG0522	Ribosomal protein S4 or related protein	K02986	small subunit ribosomal protein S4
CLUSTER1086	4	COG1438	Arginine repressor	K03402	transcriptional regulator of arginine metabolism
CLUSTER1087	4	COG0693	Protein/nucleotide deglycase, PfpI/YajL/DJ-1 family (repair of methylglyoxal-glycated proteins and nucleic acids)	-	-
CLUSTER1088	4	-	-	-	-
CLUSTER1089	4	-	-	-	-
CLUSTER1090	4	COG0243	Anaerobic selenocysteine-containing dehydrogenase	-	-
CLUSTER1091	4	COG0743	1-deoxy-D-xylulose 5-phosphate reductoisomerase	K00099	1-deoxy-D-xylulose-5-phosphate reductoisomerase [EC:1.1.1.267]
CLUSTER1092	4	COG2013	AIM24 protein, required for mitochondrial respiration	-	-
CLUSTER1093	4	COG2337	mRNA-degrading endonuclease MazF, toxin component of the MazEF toxin-antitoxin module	K07171	mRNA interferase MazF [EC:3.1.-.-]
CLUSTER1094	4	COG2814	Predicted arabinose efflux permease AraJ, MFS family	K08221	MFS transporter, ACDE family, multidrug resistance protein
CLUSTER1095	4	COG2234	Zn-dependent amino- or carboxypeptidase, M28 family	K19701	aminopeptidase YwaD [EC:3.4.11.6 3.4.11.10]
CLUSTER1096	4	COG1051	ADP-ribose pyrophosphatase YjhB, NUDIX family	K03574	8-oxo-dGTP diphosphatase [EC:3.6.1.55]
CLUSTER1097	4	COG2001	MraZ, DNA-binding transcriptional regulator and inhibitor of RsmH methyltransferase activity	K03925	MraZ protein
CLUSTER1098	4	COG0024	Methionine aminopeptidase	K01265	methionyl aminopeptidase [EC:3.4.11.18]
CLUSTER1099	4	-	-	-	-
CLUSTER1100	4	COG0353	Recombinational DNA repair protein RecR	K06187	recombination protein RecR
CLUSTER1101	4	COG1396	Transcriptional regulator, contains XRE-family HTH domain	K19417	HTH-type transcriptional regulator, biofilm formation regulator
CLUSTER1102	4	-	-	-	-
CLUSTER1103	4	COG1396	Transcriptional regulator, contains XRE-family HTH domain	-	-
CLUSTER1104	4	COG4195	Phage-related replication protein YjqB, UPF0714/DUF867 family	-	-
CLUSTER1105	4	COG1175	ABC-type sugar transport system, permease component	K10118	raffinose/stachyose/melibiose transport system permease protein
CLUSTER1106	4	COG2223	Nitrate/nitrite transporter NarK	K02575	MFS transporter, NNP family, nitrate/nitrite transporter
CLUSTER1107	4	COG5853	Small acid-soluble spore protein SspE (gamma-type)	K06422	small acid-soluble spore protein E (minor gamma-type SASP)
CLUSTER1108	4	COG1502	Phosphatidylserine/phosphatidylglycerophosphate/cardiolipin synthase	K06131	cardiolipin synthase A/B [EC:2.7.8.-]
CLUSTER1109	4	COG0568	DNA-directed RNA polymerase, sigma subunit (sigma70/sigma32)	K03086	RNA polymerase primary sigma factor
CLUSTER1110	4	COG2162	Arylamine N-acetyltransferase	K00675	N-hydroxyarylamine O-acetyltransferase [EC:2.3.1.118]
CLUSTER1111	4	COG0491	Glyoxylase or a related metal-dependent hydrolase, beta-lactamase superfamily II	-	-
CLUSTER1112	4	COG1189	Predicted rRNA methylase YqxC, contains S4 and FtsJ domains	K06442	23S rRNA (cytidine1920-2'-O)/16S rRNA (cytidine1409-2'-O)-methyltransferase [EC:2.1.1.226 2.1.1.227]
CLUSTER1113	4	COG0609	ABC-type Fe3+-siderophore transport system, permease component	K23182	ferric citrate transport system permease protein
CLUSTER1114	4	-	-	-	-
CLUSTER1115	4	COG0081	Ribosomal protein L1	K02863	large subunit ribosomal protein L1
CLUSTER1116	4	COG0115	Branched-chain amino acid aminotransferase/4-amino-4-deoxychorismate lyase	K00824	D-alanine transaminase [EC:2.6.1.21]
CLUSTER1117	4	COG3340	Peptidase E	K05995	dipeptidase E [EC:3.4.13.21]
CLUSTER1118	4	-	-	-	-
CLUSTER1119	4	COG2208	Phosphoserine phosphatase RsbU, regulator of sigma subunit	K05518	phosphoserine phosphatase RsbX [EC:3.1.3.3]
CLUSTER1120	4	COG3829	RocR-type transcriptional regulator, contains PAS, AAA-type ATPase, and DNA-binding Fis domains	-	-
CLUSTER1121	4	-	-	-	-
CLUSTER1122	4	COG2249	Putative NADPH-quinone reductase (modulator of drug activity B)	-	-
CLUSTER1123	4	COG0609	ABC-type Fe3+-siderophore transport system, permease component	K02015	iron complex transport system permease protein
CLUSTER1124	4	COG2040	Homocysteine/selenocysteine methylase (S-methylmethionine-dependent)	K00547	homocysteine S-methyltransferase [EC:2.1.1.10]
CLUSTER1125	4	COG0755	ABC-type transport system involved in cytochrome c biogenesis, permease component	K02497	HemX protein
CLUSTER1126	4	COG0715	ABC-type nitrate/sulfonate/bicarbonate transport system, periplasmic component	K15553	sulfonate transport system substrate-binding protein
CLUSTER1127	4	COG5907	Spore germination protein GerPB, DUF2539 family (inner spore coat)	K06300	spore germination protein PB
CLUSTER1128	4	-	-	-	-
CLUSTER1129	4	COG1349	DNA-binding transcriptional regulator of sugar metabolism, DeoR/GlpR family	-	-
CLUSTER1130	4	COG0254	Ribosomal protein L31	K02909	large subunit ribosomal protein L31
CLUSTER1131	4	COG2891	Cell shape-determining protein MreD	K03571	rod shape-determining protein MreD
CLUSTER1132	4	-	-	-	-
CLUSTER1133	4	COG0658	DNA uptake channel protein ComEC, N-terminal domain	K02238	competence protein ComEC
CLUSTER1134	4	COG0642	Signal transduction histidine kinase	K07650	two-component system, OmpR family, sensor histidine kinase CssS [EC:2.7.13.3]
CLUSTER1135	4	COG4940	Competence protein ComGF	K02248	competence protein ComGF
CLUSTER1136	4	COG1338	Flagellar biosynthesis protein FliP	K02419	flagellar biosynthesis protein FliP
CLUSTER1137	4	-	-	-	-
CLUSTER1138	4	COG5920	Uncharacterized sporulation protein YqfT, contains DUF2624 domain	-	-
CLUSTER1139	4	COG1738	Queuosine precursor transporter YhhQ, DUF165 family	K09125	queuosine precursor transporter
CLUSTER1140	4	COG4109	Predicted transcriptional regulator containing CBS domains	-	-
CLUSTER1141	4	COG0600	ABC-type nitrate/sulfonate/bicarbonate transport system, permease component	K02050	NitT/TauT family transport system permease protein
CLUSTER1142	4	COG1940	Sugar kinase of the NBD/HSP70 family, may contain an N-terminal HTH domain	-	-
CLUSTER1143	4	COG0524	Sugar or nucleoside kinase, ribokinase family	K00874	2-dehydro-3-deoxygluconokinase [EC:2.7.1.45]
CLUSTER1144	4	COG2723	Beta-glucosidase/6-phospho-beta-glucosidase/beta-galactosidase	K01223	6-phospho-beta-glucosidase [EC:3.2.1.86]
CLUSTER1145	4	COG1960	Acyl-CoA dehydrogenase related to the alkylation response protein AidB	-	-
CLUSTER1146	4	COG1684	Flagellar biosynthesis protein FliR	K02421	flagellar biosynthesis protein FliR
CLUSTER1147	4	COG0682	Prolipoprotein diacylglyceryltransferase	K13292	phosphatidylglycerol---prolipoprotein diacylglyceryl transferase [EC:2.5.1.145]
CLUSTER1148	4	COG1866	Phosphoenolpyruvate carboxykinase, ATP-dependent	K01610	phosphoenolpyruvate carboxykinase (ATP) [EC:4.1.1.49]
CLUSTER1149	4	COG1165	2-succinyl-5-enolpyruvyl-6-hydroxy-3-cyclohexene-1-carboxylate synthase	K02551	2-succinyl-5-enolpyruvyl-6-hydroxy-3-cyclohexene-1-carboxylate synthase [EC:2.2.1.9]
CLUSTER1150	4	COG0119	Isopropylmalate/homocitrate/citramalate synthases	K01640	hydroxymethylglutaryl-CoA lyase [EC:4.1.3.4]
CLUSTER1151	4	COG0106	Phosphoribosylformimino-5-aminoimidazole carboxamide ribonucleotide (ProFAR) isomerase	K01814	phosphoribosylformimino-5-aminoimidazole carboxamide ribotide isomerase [EC:5.3.1.16]
CLUSTER1152	4	COG0642	Signal transduction histidine kinase	-	-
CLUSTER1153	4	COG2814	Predicted arabinose efflux permease AraJ, MFS family	K08153	MFS transporter, DHA1 family, multidrug resistance protein
CLUSTER1154	4	COG1220	ATP-dependent protease HslVU (ClpYQ), ATPase subunit HslU	K03667	ATP-dependent HslUV protease ATP-binding subunit HslU
CLUSTER1155	4	COG1167	DNA-binding transcriptional regulator, MocR family, contains an aminotransferase domain	K00375	GntR family transcriptional regulator / MocR family aminotransferase
CLUSTER1156	4	COG1653	ABC-type glycerol-3-phosphate transport system, periplasmic component	K02027	multiple sugar transport system substrate-binding protein
CLUSTER1157	4	COG1524	c-di-AMP phosphodiesterase AtaC or nucleotide pyrophosphatase, AlkP superfamily	-	-
CLUSTER1158	4	-	-	-	-
CLUSTER1159	4	COG0320	Lipoate synthase	K03644	lipoyl synthase [EC:2.8.1.8]
CLUSTER1160	4	COG1162	Ribosome biogenesis GTPase RsgA	K06949	ribosome biogenesis GTPase / thiamine phosphate phosphatase [EC:3.6.1.- 3.1.3.100]
CLUSTER1161	4	COG0334	Glutamate dehydrogenase/leucine dehydrogenase	K00263	leucine dehydrogenase [EC:1.4.1.9]
CLUSTER1162	4	COG3835	Sugar diacid utilization regulator CdaR	K02647	carbohydrate diacid regulator
CLUSTER1163	4	COG0532	Translation initiation factor IF-2, a GTPase	K02519	translation initiation factor IF-2
CLUSTER1164	4	COG1381	Recombinational DNA repair protein RecO (RecF pathway)	K03584	DNA repair protein RecO (recombination protein O)
CLUSTER1165	4	COG0553	Superfamily II DNA or RNA helicase, SNF2 family	-	-
CLUSTER1166	4	COG0503	Adenine/guanine phosphoribosyltransferase or related PRPP-binding protein	K00759	adenine phosphoribosyltransferase [EC:2.4.2.7]
CLUSTER1167	4	COG1820	N-acetylglucosamine-6-phosphate deacetylase	K01443	N-acetylglucosamine-6-phosphate deacetylase [EC:3.5.1.25]
CLUSTER1168	4	COG0448	Glucose-1-phosphate adenylyltransferase (ADP-glucose pyrophosphorylase)	K00975	glucose-1-phosphate adenylyltransferase [EC:2.7.7.27]
CLUSTER1169	4	COG1834	N-Dimethylarginine dimethylaminohydrolase	-	-
CLUSTER1170	4	-	-	-	-
CLUSTER1171	4	COG1251	NAD(P)H-nitrite reductase, large subunit	K00362	nitrite reductase (NADH) large subunit [EC:1.7.1.15]
CLUSTER1172	4	COG3631	Ketosteroid isomerase-related protein	K06893	uncharacterized protein
CLUSTER1173	4	COG1160	Double Era-like domain GTPase Der	K03977	GTPase
CLUSTER1174	4	-	-	-	-
CLUSTER1175	4	COG2318	Bacillithiol/mycothiol S-transferase BstA/DinB, DinB/YfiT family (unrelated to E. coli DinB)	-	-
CLUSTER1176	4	COG0318	O-succinylbenzoic acid-CoA ligase MenE or related acyl-CoA synthetase (AMP-forming)	K01911	o-succinylbenzoate---CoA ligase [EC:6.2.1.26]
CLUSTER1177	4	COG2814	Predicted arabinose efflux permease AraJ, MFS family	K06609	MFS transporter, SP family, major inositol transporter
CLUSTER1178	4	COG1611	Nucleotide monophosphate nucleosidase PpnN/YdgH, Lonely Guy (LOG) family	-	-
CLUSTER1179	4	-	-	-	-
CLUSTER1180	4	-	-	K06389	stage II sporulation protein SB
CLUSTER1181	4	COG5010	Flp pilus assembly protein TadD, contains TPR repeats	-	-
CLUSTER1182	4	COG1123	ABC-type glutathione transport system ATPase component, contains duplicated ATPase domain	K02032	peptide/nickel transport system ATP-binding protein
CLUSTER1183	4	COG0549	Carbamate kinase	K00926	carbamate kinase [EC:2.7.2.2]
CLUSTER1184	4	COG0554	Glycerol kinase	K00864	glycerol kinase [EC:2.7.1.30]
CLUSTER1185	4	-	-	K19432	anti-repressor of SlrR
CLUSTER1186	4	COG0506	Proline dehydrogenase	K00318	proline dehydrogenase [EC:1.5.5.2]
CLUSTER1187	4	COG0505	Carbamoylphosphate synthase small subunit	K01956	carbamoyl-phosphate synthase small subunit [EC:6.3.5.5]
CLUSTER1188	4	COG1360	Flagellar motor protein MotB	K02557	chemotaxis protein MotB
CLUSTER1189	4	COG1121	ABC-type Mn2+/Zn2+ transport system, ATPase component	K19973	manganese transport system ATP-binding protein [EC:7.2.2.5]
CLUSTER1190	4	COG2133	Glucose/arabinose dehydrogenase, beta-propeller fold	-	-
CLUSTER1191	4	COG0444	ABC-type dipeptide/oligopeptide/nickel transport system, ATPase component	K02031	peptide/nickel transport system ATP-binding protein
CLUSTER1192	4	COG0416	Acyl-ACP:phosphate acyltransferase (fatty acid/phospholipid biosynthesis)	K03621	phosphate acyltransferase [EC:2.3.1.274]
CLUSTER1193	4	-	-	-	-
CLUSTER1194	4	COG4987	ABC-type transport system involved in cytochrome bd biosynthesis, fused ATPase and permease components	K16012	ATP-binding cassette, subfamily C, bacterial CydC
CLUSTER1195	4	-	-	-	-
CLUSTER1196	4	COG0583	DNA-binding transcriptional regulator, LysR family	K21900	LysR family transcriptional regulator, transcriptional activator of the cysJI operon
CLUSTER1197	4	-	-	-	-
CLUSTER1198	4	-	-	-	-
CLUSTER1199	4	-	-	K01992	ABC-2 type transport system permease protein
CLUSTER1200	4	COG1506	Dipeptidyl aminopeptidase/acylaminoacyl peptidase	-	-
CLUSTER1201	4	COG0628	Predicted PurR-regulated permease PerM	-	-
CLUSTER1202	4	COG1225	Peroxiredoxin	-	-
CLUSTER1203	4	COG5916	Uncharacterized sporulation protein YfkD	-	-
CLUSTER1204	4	COG1301	Na+/H+-dicarboxylate symporter	-	-
CLUSTER1205	4	COG0115	Branched-chain amino acid aminotransferase/4-amino-4-deoxychorismate lyase	K00826	branched-chain amino acid aminotransferase [EC:2.6.1.42]
CLUSTER1206	4	COG0151	Phosphoribosylamine-glycine ligase	K01945	phosphoribosylamine---glycine ligase [EC:6.3.4.13]
CLUSTER1207	4	COG0671	Membrane-associated phospholipid phosphatase	-	-
CLUSTER1208	4	COG2524	Predicted transcriptional regulator, contains C-terminal CBS domains	-	-
CLUSTER1209	4	COG0371	Glycerol dehydrogenase or related enzyme, iron-containing ADH family	K00096	glycerol-1-phosphate dehydrogenase [NAD(P)+] [EC:1.1.1.261]
CLUSTER1210	4	-	-	K25159	protein EcsC
CLUSTER1211	4	-	-	-	-
CLUSTER1212	4	COG1802	DNA-binding transcriptional regulator, GntR family	-	-
CLUSTER1213	4	COG2814	Predicted arabinose efflux permease AraJ, MFS family	K07552	MFS transporter, DHA1 family, multidrug resistance protein
CLUSTER1214	4	COG1028	NAD(P)-dependent dehydrogenase, short-chain alcohol dehydrogenase family	K00059	3-oxoacyl-[acyl-carrier protein] reductase [EC:1.1.1.100]
CLUSTER1215	4	COG0668	Small-conductance mechanosensitive channel	K16052	MscS family membrane protein
CLUSTER1216	4	COG1826	Twin-arginine protein secretion pathway components TatA and TatB	K03116	sec-independent protein translocase protein TatA
CLUSTER1217	4	COG3402	Uncharacterized membrane protein YdbS, contains bPH2 (bacterial pleckstrin homology) domain	K09167	uncharacterized protein
CLUSTER1218	4	COG0501	Zn-dependent protease with chaperone function	K03799	heat shock protein HtpX [EC:3.4.24.-]
CLUSTER1219	4	COG2261	Uncharacterized membrane protein YeaQ/YmgE, transglycosylase-associated protein family	-	-
CLUSTER1220	4	COG2461	Uncharacterized conserved protein AF0170, contains SAB, hemerythrin HHE, and PAS domains	K09155	uncharacterized protein
CLUSTER1221	4	COG1646	Glycerol-1-phosphate heptaprenyltransferase	K07094	heptaprenylglyceryl phosphate synthase [EC:2.5.1.-]
CLUSTER1222	4	COG0601	ABC-type dipeptide/oligopeptide/nickel transport system, permease component	K15585	nickel transport system permease protein
CLUSTER1223	4	COG1638	TRAP-type C4-dicarboxylate transport system, periplasmic component	-	-
CLUSTER1224	4	COG4225	Rhamnogalacturonyl hydrolase YesR	K15532	unsaturated rhamnogalacturonyl hydrolase [EC:3.2.1.172]
CLUSTER1225	4	COG1516	Flagellin-specific chaperone FliS	K02422	flagellar secretion chaperone FliS
CLUSTER1226	4	COG4918	Predicted Fe-S cluster biosynthesis protein YqkB	-	-
CLUSTER1227	4	COG4856	Cyclic di-AMP synthase regulator CdaR, YbbR domain	-	-
CLUSTER1228	4	COG0118	Imidazoleglycerol phosphate synthase glutamine amidotransferase subunit HisH	K02501	imidazole glycerol-phosphate synthase subunit HisH [EC:4.3.2.10]
CLUSTER1229	4	COG0657	Acetyl esterase/lipase	-	-
CLUSTER1230	4	COG1575	1,4-dihydroxy-2-naphthoate polyprenyltransferase	K02548	1,4-dihydroxy-2-naphthoate polyprenyltransferase [EC:2.5.1.74]
CLUSTER1231	4	COG0289	4-hydroxy-tetrahydrodipicolinate reductase	K00215	4-hydroxy-tetrahydrodipicolinate reductase [EC:1.17.1.8]
CLUSTER1232	4	COG0719	Fe-S cluster assembly scaffold protein SufB	K09015	Fe-S cluster assembly protein SufD
CLUSTER1233	4	COG4767	Glycopeptide antibiotics resistance protein	-	-
CLUSTER1234	4	COG0457	Tetratricopeptide (TPR) repeat	K06362	response regulator aspartate phosphatase D [EC:3.1.-.-]
CLUSTER1235	4	COG3162	Uncharacterized membrane protein, DUF485 family	-	-
CLUSTER1236	4	COG0126	3-phosphoglycerate kinase	K00927	phosphoglycerate kinase [EC:2.7.2.3]
CLUSTER1237	4	COG0550	DNA topoisomerase IA	K03169	DNA topoisomerase III [EC:5.6.2.1]
CLUSTER1238	4	COG4639	Predicted kinase	-	-
CLUSTER1239	4	-	-	-	-
CLUSTER1240	4	COG3967	Short-chain dehydrogenase involved in D-alanine esterification of teichoic acids	K14189	uncharacterized oxidoreductase [EC:1.-.-.-]
CLUSTER1241	4	COG0463	Glycosyltransferase involved in cell wall bisynthesis	K20534	polyisoprenyl-phosphate glycosyltransferase [EC:2.4.-.-]
CLUSTER1242	4	COG0303	Molybdopterin Mo-transferase (molybdopterin biosynthesis)	K03750	molybdopterin molybdotransferase [EC:2.10.1.1]
CLUSTER1243	4	COG0491	Glyoxylase or a related metal-dependent hydrolase, beta-lactamase superfamily II	-	-
CLUSTER1244	4	COG0805	Twin-arginine protein secretion pathway component TatC	K03118	sec-independent protein translocase protein TatC
CLUSTER1245	4	COG1404	Serine protease, subtilisin family	K17734	serine protease AprX [EC:3.4.21.-]
CLUSTER1246	4	COG4492	ACT domain-containing protein, UPF0735 family	K06209	chorismate mutase [EC:5.4.99.5]
CLUSTER1247	4	COG1157	Flagellar biosynthesis/type III secretory pathway ATPase FliI	K02412	flagellum-specific ATP synthase [EC:7.4.2.8]
CLUSTER1248	4	COG0552	Signal recognition particle GTPase FtsY	K03110	fused signal recognition particle receptor
CLUSTER1249	4	COG1671	Uncharacterized conserved protein YaiI, UPF0178 family	K09768	uncharacterized protein
CLUSTER1250	4	COG5891	Spore coat protein YheC/YheD, ATP-grasp superfamily	-	-
CLUSTER1251	4	COG1161	Ribosome biogenesis GTPase RbgA	K14540	ribosome biogenesis GTPase A
CLUSTER1252	4	COG1104	Cysteine desulfurase/Cysteine sulfinate desulfinase IscS or related enzyme, NifS family	K04487	cysteine desulfurase [EC:2.8.1.7]
CLUSTER1253	4	COG2052	Regulator of extracellular matrix RemA, YlzA/DUF370 family	K09777	extracellular matrix regulatory protein A
CLUSTER1254	4	-	-	-	-
CLUSTER1255	4	COG1825	Ribosomal protein L25 (general stress protein Ctc)	K02897	large subunit ribosomal protein L25
CLUSTER1256	4	COG2059	Chromate transport protein ChrA	K07240	chromate transporter
CLUSTER1257	4	COG1123	ABC-type glutathione transport system ATPase component, contains duplicated ATPase domain	K10824	nickel transport system ATP-binding protein [EC:7.2.2.11]
CLUSTER1258	4	-	-	-	-
CLUSTER1259	4	COG5868	Sporulation protein YabP	-	-
CLUSTER1260	4	COG0791	Cell wall-associated hydrolase, NlpC_P60 family	K20742	gamma-D-glutamyl-L-lysine dipeptidyl-peptidase [EC:3.4.14.13]
CLUSTER1261	4	COG4200	Predicted lantabiotic-exporting membrane pepmease, EfiE/EfiG/ABC2 family	K20492	lantibiotic transport system permease protein
CLUSTER1262	4	COG1819	UDP:flavonoid glycosyltransferase YjiC, YdhE family	-	-
CLUSTER1263	4	COG1801	Sugar isomerase-related protein YecE, UPF0759/DUF72 family	-	-
CLUSTER1264	4	COG0800	2-keto-3-deoxy-6-phosphogluconate aldolase	K01625	2-dehydro-3-deoxyphosphogluconate aldolase / (4S)-4-hydroxy-2-oxoglutarate aldolase [EC:4.1.2.14 4.1.3.42]
CLUSTER1265	4	-	-	-	-
CLUSTER1266	4	COG2721	Altronate dehydratase	K01685	altronate hydrolase [EC:4.2.1.7]
CLUSTER1267	4	COG0047	Phosphoribosylformylglycinamidine (FGAM) synthase, glutamine amidotransferase domain	K23265	phosphoribosylformylglycinamidine synthase subunit PurQ / glutaminase [EC:6.3.5.3 3.5.1.2]
CLUSTER1268	4	COG0822	Fe-S cluster assembly scaffold protein IscU, NifU family	K04488	nitrogen fixation protein NifU and related proteins
CLUSTER1269	4	-	-	-	-
CLUSTER1270	4	COG3263	NhaP-type Na+/H+ and K+/H+ antiporter with C-terminal TrkAC and CorC domains	K11105	potassium/hydrogen antiporter
CLUSTER1271	4	COG0537	Purine nucleoside phosphoramidase/Ap4A hydrolase, histidine triade (HIT) family	K02503	histidine triad (HIT) family protein
CLUSTER1272	4	COG5002	Sensor histidine kinase WalK	K07652	two-component system, OmpR family, sensor histidine kinase VicK [EC:2.7.13.3]
CLUSTER1273	4	COG0583	DNA-binding transcriptional regulator, LysR family	K21960	LysR family transcriptional regulator, regulator of the ytmI operon
CLUSTER1274	4	COG5924	Uncharacterized sporulation protein YtfI, contains DUF2953 domain	-	-
CLUSTER1275	4	-	-	-	-
CLUSTER1276	4	COG1512	Uncharacterized membrane protein YgcG, contains a TPM-fold domain	K06872	uncharacterized protein
CLUSTER1277	4	COG0513	Superfamily II DNA and RNA helicase	-	-
CLUSTER1278	4	COG1028	NAD(P)-dependent dehydrogenase, short-chain alcohol dehydrogenase family	-	-
CLUSTER1279	4	COG2814	Predicted arabinose efflux permease AraJ, MFS family	-	-
CLUSTER1280	4	-	-	-	-
CLUSTER1281	4	-	-	-	-
CLUSTER1282	4	COG0009	tRNA A37 threonylcarbamoyladenosine synthetase subunit TsaC/SUA5/YrdC	K07566	L-threonylcarbamoyladenylate synthase [EC:2.7.7.87]
CLUSTER1283	4	COG2216	K+ transport ATPase, ATPase subunit KdpB	K01547	potassium-transporting ATPase ATP-binding subunit [EC:7.2.2.6]
CLUSTER1284	4	-	-	-	-
CLUSTER1285	4	COG0583	DNA-binding transcriptional regulator, LysR family	-	-
CLUSTER1286	4	-	-	-	-
CLUSTER1287	4	COG2723	Beta-glucosidase/6-phospho-beta-glucosidase/beta-galactosidase	K01223	6-phospho-beta-glucosidase [EC:3.2.1.86]
CLUSTER1288	4	COG3238	Uncharacterized membrane protein YdcZ, DUF606 family	K09936	bacterial/archaeal transporter family-2 protein
CLUSTER1289	4	COG0073	tRNA-binding EMAP/Myf domain	K06878	tRNA-binding protein
CLUSTER1290	4	COG5581	Cyclic di-GMP-binding flagellar brake protein FlgZ/YcgR, contains PilZNR(YcgR) and PilZ domains	K21087	flagellar brake protein
CLUSTER1291	4	COG1835	Peptidoglycan/LPS O-acetylase OafA/YrhL, contains acyltransferase and SGNH-hydrolase domains	-	-
CLUSTER1292	4	COG2039	Pyrrolidone-carboxylate peptidase (N-terminal pyroglutamyl peptidase)	K01304	pyroglutamyl-peptidase [EC:3.4.19.3]
CLUSTER1293	4	COG3599	Cell division septum initiation protein DivIVA, interacts with FtsZ and MinD	K04074	cell division initiation protein
CLUSTER1294	4	COG1988	Membrane-bound metal-dependent hydrolase YbcI, DUF457 family	K07038	inner membrane protein
CLUSTER1295	4	COG1725	DNA-binding transcriptional regulator YhcF, GntR family	-	-
CLUSTER1296	4	-	-	-	-
CLUSTER1297	4	COG3369	Uncharacterized conserved protein, contains Zn-finger domain of CDGSH type	-	-
CLUSTER1298	4	COG5504	Predicted Zn-dependent protease YjaZ, DUF2268 family	-	-
CLUSTER1299	4	COG0150	Phosphoribosylaminoimidazole (AIR) synthetase	K01933	phosphoribosylformylglycinamidine cyclo-ligase [EC:6.3.3.1]
CLUSTER1300	4	-	-	-	-
CLUSTER1301	4	COG0163	Flavin prenyltransferase UbiX	K03186	flavin prenyltransferase [EC:2.5.1.129]
CLUSTER1302	4	COG0133	Tryptophan synthase beta chain	K01696	tryptophan synthase beta chain [EC:4.2.1.20]
CLUSTER1303	4	COG1073	Fermentation-respiration switch esterase FrsA, DUF1100 family	K06889	uncharacterized protein
CLUSTER1304	4	COG0745	DNA-binding response regulator, OmpR family, contains REC and winged-helix (wHTH) domain	-	-
CLUSTER1305	4	COG1063	Threonine dehydrogenase or related Zn-dependent dehydrogenase	K00121	S-(hydroxymethyl)glutathione dehydrogenase / alcohol dehydrogenase [EC:1.1.1.284 1.1.1.1]
CLUSTER1306	4	COG1070	Sugar (pentulose or hexulose) kinase	K00854	xylulokinase [EC:2.7.1.17]
CLUSTER1307	4	COG0405	Gamma-glutamyltranspeptidase	K00681	gamma-glutamyltranspeptidase / glutathione hydrolase [EC:2.3.2.2 3.4.19.13]
CLUSTER1308	4	COG4955	Uncharacterized conserved protein YpbB, contains C-terminal HTH domain	-	-
CLUSTER1309	4	COG0493	NADPH-dependent glutamate synthase beta chain or related oxidoreductase	K00266	glutamate synthase (NADPH) small chain [EC:1.4.1.13]
CLUSTER1310	4	-	-	-	-
CLUSTER1311	4	COG0637	Beta-phosphoglucomutase, HAD superfamily	K01838	beta-phosphoglucomutase [EC:5.4.2.6]
CLUSTER1312	4	COG5873	Uncharacterized sporulation protein YqzE	-	-
CLUSTER1313	4	COG1242	Radical SAM superfamily enzyme	K07139	uncharacterized protein
CLUSTER1314	4	-	-	-	-
CLUSTER1315	4	COG2128	Alkylhydroperoxidase family enzyme, contains CxxC motif	-	-
CLUSTER1316	4	COG1115	Na+/alanine symporter	K03310	alanine or glycine:cation symporter, AGCS family
CLUSTER1317	4	COG1846	DNA-binding transcriptional regulator, MarR family	K15973	MarR family transcriptional regulator, 2-MHQ and catechol-resistance regulon repressor
CLUSTER1318	4	COG5863	Small acid-soluble spore protein Tlp (thioredoxin-like protein)	K06434	small acid-soluble spore protein (thioredoxin-like protein)
CLUSTER1319	4	COG1862	Protein translocase subunit YajC	K03210	preprotein translocase subunit YajC
CLUSTER1320	4	COG0646	Methionine synthase I (cobalamin-dependent), methyltransferase domain	K00548	5-methyltetrahydrofolate--homocysteine methyltransferase [EC:2.1.1.13]
CLUSTER1321	4	COG0640	DNA-binding transcriptional regulator, ArsR family	-	-
CLUSTER1322	4	COG0088	Ribosomal protein L4	K02926	large subunit ribosomal protein L4
CLUSTER1323	4	COG0696	Phosphoglycerate mutase (BPG-independent), AlkP superfamily	K15633	2,3-bisphosphoglycerate-independent phosphoglycerate mutase [EC:5.4.2.12]
CLUSTER1324	4	COG4912	3-methyladenine DNA glycosylase AlkD	-	-
CLUSTER1325	4	COG3944	Capsular polysaccharide biosynthesis protein YveK	K19420	protein tyrosine kinase EpsB modulator
CLUSTER1326	4	COG0474	Magnesium-transporting ATPase (P-type)	K01537	P-type Ca2+ transporter type 2C [EC:7.2.2.10]
CLUSTER1327	4	COG1766	Flagellar biosynthesis/type III secretory pathway M-ring protein FliF/YscJ	K02409	flagellar M-ring protein FliF
CLUSTER1328	4	-	-	-	-
CLUSTER1329	4	COG1295	Uncharacterized membrane protein, BrkB/YihY/UPF0761 family (not an RNase)	K07058	membrane protein
CLUSTER1330	4	COG0716	Flavodoxin	K03839	flavodoxin I
CLUSTER1331	4	COG4241	Uncharacterized conserved protein YybS, DUF2232 family	-	-
CLUSTER1332	4	COG1846	DNA-binding transcriptional regulator, MarR family	-	-
CLUSTER1333	4	COG0443	Molecular chaperone DnaK (HSP70)	K04043	molecular chaperone DnaK
CLUSTER1334	4	COG1846	DNA-binding transcriptional regulator, MarR family	-	-
CLUSTER1335	4	COG0204	1-acyl-sn-glycerol-3-phosphate acyltransferase	-	-
CLUSTER1336	4	COG2182	Maltose-binding periplasmic protein MalE	K15770	arabinogalactan oligomer / maltooligosaccharide transport system substrate-binding protein
CLUSTER1337	4	COG3711	Transcriptional antiterminator	K03480	transcriptional antiterminator
CLUSTER1338	4	COG0789	DNA-binding transcriptional regulator, MerR family	-	-
CLUSTER1339	4	COG0400	Predicted esterase	K06999	phospholipase/carboxylesterase
CLUSTER1340	4	COG0764	3-hydroxymyristoyl/3-hydroxydecanoyl-(acyl carrier protein) dehydratase	K02372	3-hydroxyacyl-[acyl-carrier-protein] dehydratase [EC:4.2.1.59]
CLUSTER1341	4	-	-	-	-
CLUSTER1342	4	COG1653	ABC-type glycerol-3-phosphate transport system, periplasmic component	K17234	arabinooligosaccharide transport system substrate-binding protein
CLUSTER1343	4	-	-	-	-
CLUSTER1344	4	COG1612	Heme A synthase	K02259	heme a synthase [EC:1.17.99.9]
CLUSTER1345	4	COG0730	Sulfite exporter TauE/SafE/YfcA and related permeases, UPF0721 family	K07090	uncharacterized protein
CLUSTER1346	4	-	-	-	-
CLUSTER1347	4	COG0655	Multimeric flavodoxin WrbA, includes NAD(P)H:quinone oxidoreductase	K03809	NAD(P)H dehydrogenase (quinone) [EC:1.6.5.2]
CLUSTER1348	4	-	-	K00805	heptaprenyl diphosphate synthase component 1 [EC:2.5.1.30]
CLUSTER1349	4	COG1414	DNA-binding transcriptional regulator, IclR family	-	-
CLUSTER1350	4	COG2057	Acyl-CoA:acetate/3-ketoacid CoA transferase, beta subunit	K01035	acetate CoA/acetoacetate CoA-transferase beta subunit [EC:2.8.3.8 2.8.3.9]
CLUSTER1351	4	-	-	-	-
CLUSTER1352	4	COG0842	ABC-type multidrug transport system, permease component	K25142	linearmycin/streptolysin S transport system permease protein
CLUSTER1353	4	COG3290	Sensor histidine kinase DipB regulating citrate/malate metabolism	K02476	two-component system, CitB family, sensor kinase [EC:2.7.13.3]
CLUSTER1354	4	COG0213	Thymidine phosphorylase	K00756	pyrimidine-nucleoside phosphorylase [EC:2.4.2.2]
CLUSTER1355	4	COG0739	Murein DD-endopeptidase MepM and murein hydrolase activator NlpD, contains LysM domain	-	-
CLUSTER1356	4	COG0258;COG0749	5'-3' exonuclease Xni/ExoIX (flap endonuclease);DNA polymerase I, 3'-5' exonuclease and polymerase domains	K02335	DNA polymerase I [EC:2.7.7.7]
CLUSTER1357	4	COG1963	Acid phosphatase family membrane protein YuiD	K09775	uncharacterized protein
CLUSTER1358	4	COG0781	Transcription antitermination protein NusB	K03625	transcription antitermination protein NusB
CLUSTER1359	4	COG1387	Histidinol phosphatase or related hydrolase of the PHP family	K04486	histidinol-phosphatase (PHP family) [EC:3.1.3.15]
CLUSTER1360	4	COG1182	FMN-dependent NADH-azoreductase	K01118	FMN-dependent NADH-azoreductase [EC:1.7.1.17]
CLUSTER1361	4	COG1309	DNA-binding protein, AcrR family, includes nucleoid occlusion protein SlmA	-	-
CLUSTER1362	4	COG0719	Fe-S cluster assembly scaffold protein SufB	K09014	Fe-S cluster assembly protein SufB
CLUSTER1363	4	COG4100	Cystathionine beta-lyase family protein involved in aluminum resistance	-	-
CLUSTER1364	4	-	-	-	-
CLUSTER1365	4	COG0041	Phosphoribosylcarboxyaminoimidazole (NCAIR) mutase	K01588	5-(carboxyamino)imidazole ribonucleotide mutase [EC:5.4.99.18]
CLUSTER1366	4	COG1609	DNA-binding transcriptional regulator, LacI/PurR family	K02529	LacI family transcriptional regulator
CLUSTER1367	4	COG3011	Predicted thiol-disulfide oxidoreductase YuxK, DCC family	-	-
CLUSTER1368	4	COG4225	Rhamnogalacturonyl hydrolase YesR	K15532	unsaturated rhamnogalacturonyl hydrolase [EC:3.2.1.172]
CLUSTER1369	4	-	-	-	-
CLUSTER1370	4	COG2244	Membrane protein involved in the export of O-antigen and teichoic acid	K19418	membrane protein EpsK
CLUSTER1371	4	COG0263	Glutamate 5-kinase	K00931	glutamate 5-kinase [EC:2.7.2.11]
CLUSTER1372	4	COG1028	NAD(P)-dependent dehydrogenase, short-chain alcohol dehydrogenase family	K00059	3-oxoacyl-[acyl-carrier protein] reductase [EC:1.1.1.100]
CLUSTER1373	4	-	-	-	-
CLUSTER1374	4	COG0773	UDP-N-acetylmuramate-alanine ligase MurC and related ligases, MurC/Mpl family	K01924	UDP-N-acetylmuramate--alanine ligase [EC:6.3.2.8]
CLUSTER1375	4	COG0463	Glycosyltransferase involved in cell wall bisynthesis	-	-
CLUSTER1376	4	COG3465	Uncharacterized conserved protein YwgA	K09388	uncharacterized protein
CLUSTER1377	4	COG1316	Anionic cell wall polymer biosynthesis enzyme TagV/TagU, LytR-Cps2A-Psr (LCP) family (peptidoglycan teichoic acid transferase)	K01005	polyisoprenyl-teichoic acid--peptidoglycan teichoic acid transferase [EC:2.7.8.-]
CLUSTER1378	4	COG1404	Serine protease, subtilisin family	K14647	minor extracellular serine protease Vpr [EC:3.4.21.-]
CLUSTER1379	4	COG1925	HPr or related phosphotransfer protein	K11184	catabolite repression HPr-like protein
CLUSTER1380	4	COG1725	DNA-binding transcriptional regulator YhcF, GntR family	K07979	GntR family transcriptional regulator
CLUSTER1381	4	COG1959	DNA-binding transcriptional regulator, IscR family	-	-
CLUSTER1382	4	COG0147;COG2890	Anthranilate/para-aminobenzoate synthases component I;Methylase of polypeptide chain release factors	K13950	para-aminobenzoate synthetase [EC:2.6.1.85]
CLUSTER1383	4	COG0438	Glycosyltransferase involved in cell wall bisynthesis	K00754	L-malate glycosyltransferase [EC:2.4.1.-]
CLUSTER1384	4	COG0640	DNA-binding transcriptional regulator, ArsR family	-	-
CLUSTER1385	4	COG2003	DNA repair protein RadC, contains a helix-hairpin-helix DNA-binding motif	K03630	DNA repair protein RadC
CLUSTER1386	4	COG0477	MFS family permease, includes anhydromuropeptide permease AmpG	-	-
CLUSTER1387	4	COG2223	Nitrate/nitrite transporter NarK	K08177	MFS transporter, OFA family, oxalate/formate antiporter
CLUSTER1388	4	COG0466	ATP-dependent Lon protease, bacterial type	K01338	ATP-dependent Lon protease [EC:3.4.21.53]
CLUSTER1389	4	-	-	-	-
CLUSTER1390	4	-	-	-	-
CLUSTER1391	4	-	-	-	-
CLUSTER1392	4	-	-	-	-
CLUSTER1393	4	COG1132	ABC-type multidrug transport system, ATPase and permease component	K18888	ATP-binding cassette, subfamily B, multidrug efflux pump
CLUSTER1394	4	COG5824	Stage III sporulation protein SpoIIIAC, component of the engulfment complex	K06392	stage III sporulation protein AC
CLUSTER1395	4	COG0318	O-succinylbenzoic acid-CoA ligase MenE or related acyl-CoA synthetase (AMP-forming)	K01897	long-chain acyl-CoA synthetase [EC:6.2.1.3]
CLUSTER1396	4	-	-	-	-
CLUSTER1397	4	COG1902	2,4-dienoyl-CoA reductase or related NADH-dependent reductase, Old Yellow Enzyme (OYE) family	-	-
CLUSTER1398	4	-	-	-	-
CLUSTER1399	4	COG3467	Nitroimidazole reductase NimA or a related FMN-containing flavoprotein, pyridoxamine 5'-phosphate oxidase superfamily	K07005	uncharacterized protein
CLUSTER1400	4	COG2011	ABC-type methionine transport system, permease component	K02072	D-methionine transport system permease protein
CLUSTER1401	4	COG3127	Predicted ABC-type transport system involved in lysophospholipase L1 biosynthesis, permease component	K11632	bacitracin transport system permease protein
CLUSTER1402	4	COG1231	Monoamine oxidase	K00274	monoamine oxidase [EC:1.4.3.4]
CLUSTER1403	4	COG3343	DNA-directed RNA polymerase, delta subunit	K03048	DNA-directed RNA polymerase subunit delta
CLUSTER1404	4	COG3594	Fucose 4-O-acetylase or related acetyltransferase	-	-
CLUSTER1405	4	COG1217	Predicted membrane GTPase TypA/BipA involved in stress response	K06207	GTP-binding protein
CLUSTER1406	4	COG0285	Folylpolyglutamate synthase/Dihydropteroate synthase	K11754	dihydrofolate synthase / folylpolyglutamate synthase [EC:6.3.2.12 6.3.2.17]
CLUSTER1407	4	COG1846	DNA-binding transcriptional regulator, MarR family	K23775	MarR family transcriptional regulator, organic hydroperoxide resistance regulator
CLUSTER1408	4	COG1533	DNA repair photolyase	K03716	spore photoproduct lyase [EC:4.1.99.14]
CLUSTER1409	4	COG1947	4-diphosphocytidyl-2C-methyl-D-erythritol kinase	K00919	4-diphosphocytidyl-2-C-methyl-D-erythritol kinase [EC:2.7.1.148]
CLUSTER1410	4	COG1455	Phosphotransferase system cellobiose-specific component IIC	K02761	cellobiose PTS system EIIC component
CLUSTER1411	4	COG3090	TRAP-type C4-dicarboxylate transport system, small permease component YiaM	-	-
CLUSTER1412	4	-	-	-	-
CLUSTER1413	4	COG2813	16S rRNA G1207 methylase RsmC	K00564	16S rRNA (guanine1207-N2)-methyltransferase [EC:2.1.1.172]
CLUSTER1414	4	COG1440	Phosphotransferase system cellobiose-specific component IIB	K02760	cellobiose PTS system EIIB component [EC:2.7.1.196 2.7.1.205]
CLUSTER1415	4	COG0609	ABC-type Fe3+-siderophore transport system, permease component	K02015	iron complex transport system permease protein
CLUSTER1416	4	COG0071	Small heat shock protein IbpA, HSP20 family	-	-
CLUSTER1417	4	COG3125	Heme/copper-type cytochrome/quinol oxidase, subunit 4	K02829	cytochrome aa3-600 menaquinol oxidase subunit IV [EC:7.1.1.5]
CLUSTER1418	4	COG0315	Molybdenum cofactor biosynthesis enzyme MoaC	K03637	cyclic pyranopterin monophosphate synthase [EC:4.6.1.17]
CLUSTER1419	4	COG0424	7-methyl-GTP pyrophosphatase and related NTP pyrophosphatases, Maf/HAM1 superfamily	K06287	septum formation protein
CLUSTER1420	4	COG0160	Acetylornithine aminotransferase/4-aminobutyrate aminotransferase	K07250	4-aminobutyrate aminotransferase / (S)-3-amino-2-methylpropionate transaminase / 5-aminovalerate transaminase [EC:2.6.1.19 2.6.1.22 2.6.1.48]
CLUSTER1421	4	COG0332	3-oxoacyl-[acyl-carrier-protein] synthase III	K00648	3-oxoacyl-[acyl-carrier-protein] synthase III [EC:2.3.1.180]
CLUSTER1422	4	COG0471	Di- and tricarboxylate antiporter	K14445	solute carrier family 13 (sodium-dependent dicarboxylate transporter), member 2/3/5
CLUSTER1423	4	-	-	-	-
CLUSTER1424	4	COG0436	Aspartate/methionine/tyrosine aminotransferase	K10907	aminotransferase [EC:2.6.1.-]
CLUSTER1425	4	COG0816	YqgF/RuvX protein, pre-16S rRNA maturation RNase/Holliday junction resolvase/anti-termination factor	K07447	putative pre-16S rRNA nuclease [EC:3.1.-.-]
CLUSTER1426	4	COG4481	Uncharacterized conserved protein, DUF951 family	-	-
CLUSTER1427	4	COG0451	Nucleoside-diphosphate-sugar epimerase	-	-
CLUSTER1428	4	COG0195	Transcription antitermination factor NusA, contains S1 and KH domains	K02600	transcription termination/antitermination protein NusA
CLUSTER1429	4	COG0395	ABC-type glycerol-3-phosphate transport system, permease component	K17236	arabinooligosaccharide transport system permease protein
CLUSTER1430	4	COG1809	Phosphosulfolactate synthase, CoM biosynthesis protein A	K08097	phosphosulfolactate synthase [EC:4.4.1.19]
CLUSTER1431	4	COG0019	Diaminopimelate decarboxylase	K01586	diaminopimelate decarboxylase [EC:4.1.1.20]
CLUSTER1432	4	COG0601	ABC-type dipeptide/oligopeptide/nickel transport system, permease component	K02033	peptide/nickel transport system permease protein
CLUSTER1433	4	-	-	-	-
CLUSTER1434	4	COG0165	Argininosuccinate lyase	K01755	argininosuccinate lyase [EC:4.3.2.1]
CLUSTER1435	4	COG0042	tRNA-dihydrouridine synthase	-	-
CLUSTER1436	4	-	-	K02116	ATP synthase protein I
CLUSTER1437	4	COG3428	Uncharacterized membrane protein YdbT, contains bPH2 (bacterial pleckstrin homology) domain	K08981	putative membrane protein
CLUSTER1438	4	COG0301	Adenylyl- and sulfurtransferase ThiI (thiamine and tRNA 4-thiouridine biosynthesis)	K03151	tRNA uracil 4-sulfurtransferase [EC:2.8.1.4]
CLUSTER1439	4	COG0671	Membrane-associated phospholipid phosphatase	K19302	undecaprenyl-diphosphatase [EC:3.6.1.27]
CLUSTER1440	4	COG4873	Uncharacterized conserved protein YkvS, DUF2187 family	-	-
CLUSTER1441	4	COG1249	Dihydrolipoamide dehydrogenase (E3) component of pyruvate/2-oxoglutarate dehydrogenase complex or glutathione oxidoreductase	K00382	dihydrolipoamide dehydrogenase [EC:1.8.1.4]
CLUSTER1442	4	-	-	-	-
CLUSTER1443	4	COG4472	Uncharacterized conserved protein, UPF0297 family	-	-
CLUSTER1444	4	-	-	-	-
CLUSTER1445	4	-	-	-	-
CLUSTER1446	4	COG0177	Endonuclease III	K10773	endonuclease III [EC:4.2.99.18]
CLUSTER1447	4	-	-	-	-
CLUSTER1448	4	COG3959	Transketolase, N-terminal subunit	K00615	transketolase [EC:2.2.1.1]
CLUSTER1449	4	COG0502	Biotin synthase or related enzyme	K01012	biotin synthase [EC:2.8.1.6]
CLUSTER1450	4	COG5832	Stage IV sporulation protein SpoIVB, serine protease, degrades SpoIIQ, SpoIVFA	K06399	stage IV sporulation protein B [EC:3.4.21.116]
CLUSTER1451	4	COG1595	DNA-directed RNA polymerase specialized sigma subunit, sigma24 family	K03091	RNA polymerase sporulation-specific sigma factor
CLUSTER1452	4	COG1792	Cell shape-determining protein MreC	K03570	rod shape-determining protein MreC
CLUSTER1453	4	COG4864	Uncharacterized conserved protein YqfA, UPF0365 family	-	-
CLUSTER1454	4	COG1388	LysM repeat	K06370	morphogenetic protein associated with SpoVID
CLUSTER1455	4	-	-	-	-
CLUSTER1456	4	COG0255	Ribosomal protein L29	K02904	large subunit ribosomal protein L29
CLUSTER1457	4	COG0145	N-methylhydantoinase A/oxoprolinase/acetone carboxylase, beta subunit	K01473	N-methylhydantoinase A [EC:3.5.2.14]
CLUSTER1458	4	COG0335	Ribosomal protein L19	K02884	large subunit ribosomal protein L19
CLUSTER1459	4	COG0242	Peptide deformylase	K01462	peptide deformylase [EC:3.5.1.88]
CLUSTER1460	4	-	-	-	-
CLUSTER1461	4	COG3872	Uncharacterized conserved protein YqhQ, DUF1385 family	-	-
CLUSTER1462	4	COG0491	Glyoxylase or a related metal-dependent hydrolase, beta-lactamase superfamily II	-	-
CLUSTER1463	4	COG2755	Lysophospholipase L1 or related esterase. Includes spore coat protein LipC/YcsK	-	-
CLUSTER1464	4	COG0700	Spore maturation protein SpmB (function unknown)	K06374	spore maturation protein B
CLUSTER1465	4	COG1271	Cytochrome bd-type quinol oxidase, subunit 1	K00425	cytochrome bd ubiquinol oxidase subunit I [EC:7.1.1.7]
CLUSTER1466	4	COG0317	(p)ppGpp synthase/hydrolase, HD superfamily	K01139	GTP diphosphokinase / guanosine-3',5'-bis(diphosphate) 3'-diphosphatase [EC:2.7.6.5 3.1.7.2]
CLUSTER1467	4	-	-	-	-
CLUSTER1468	4	-	-	-	-
CLUSTER1469	4	COG1045	Serine acetyltransferase	K00640	serine O-acetyltransferase [EC:2.3.1.30]
CLUSTER1470	4	COG2201	Chemotaxis response regulator CheB, contains REC and protein-glutamate methylesterase domains	K03412	two-component system, chemotaxis family, protein-glutamate methylesterase/glutaminase [EC:3.1.1.61 3.5.1.44]
CLUSTER1471	4	COG1776	Phosphoaspartate phosphatase CheC, specific for CheY-P	K03410	chemotaxis protein CheC
CLUSTER1472	4	COG0793	C-terminal processing protease CtpA/Prc, contains a PDZ domain	K03797	carboxyl-terminal processing protease [EC:3.4.21.102]
CLUSTER1473	4	COG1680	CubicO group peptidase, beta-lactamase class C family	-	-
CLUSTER1474	4	COG3977	Alanine-alpha-ketoisovalerate (or valine-pyruvate) aminotransferase	K00835	valine--pyruvate aminotransferase [EC:2.6.1.66]
CLUSTER1475	4	-	-	-	-
CLUSTER1476	4	COG0714	MoxR-like ATPase	K04748	nitric oxide reductase NorQ protein
CLUSTER1477	4	-	-	-	-
CLUSTER1478	4	COG1379	PHP family phosphoesterase with a Zn ribbon	-	-
CLUSTER1479	4	COG1472	Periplasmic beta-glucosidase and related glycosidases	K05349	beta-glucosidase [EC:3.2.1.21]
CLUSTER1480	4	COG1435	Thymidine kinase	K00857	thymidine kinase [EC:2.7.1.21]
CLUSTER1481	4	-	-	-	-
CLUSTER1482	4	COG0640	DNA-binding transcriptional regulator, ArsR family	-	-
CLUSTER1483	4	-	-	-	-
CLUSTER1484	4	COG0366	Glycosidase/amylase (phosphorylase)	K01208	cyclomaltodextrinase / maltogenic alpha-amylase / neopullulanase [EC:3.2.1.54 3.2.1.133 3.2.1.135]
CLUSTER1485	4	COG0067	Glutamate synthase domain 1	K00265	glutamate synthase (NADPH) large chain [EC:1.4.1.13]
CLUSTER1486	4	COG3764	Sortase (surface protein transpeptidase)	K07284	sortase A [EC:3.4.22.70]
CLUSTER1487	4	-	-	-	-
CLUSTER1488	4	COG4362	Nitric oxide synthase, oxygenase domain	K00491	nitric-oxide synthase, bacterial [EC:1.14.14.47]
CLUSTER1489	4	COG5902	Spore germination receptor GerABC, GerB subunit (amino acid transporter)	K06289	spore germination protein AB
CLUSTER1490	4	COG4260	Membrane protease subunit, stomatin/prohibitin family, contains C-terminal Zn-ribbon domain	-	-
CLUSTER1491	4	COG0211	Ribosomal protein L27	K02899	large subunit ribosomal protein L27
CLUSTER1492	4	COG1823	L-cystine transporter TcyP, sodium:dicarboxylate symporter family	K06956	uncharacterized protein
CLUSTER1493	4	COG2120	N-acetylglucosaminyl deacetylase, LmbE family	K22135	N-acetylglucosamine malate deacetylase 2 [EC:3.5.1.-]
CLUSTER1494	4	COG2141	Flavin-dependent oxidoreductase, luciferase family (includes alkanesulfonate monooxygenase SsuD and methylene tetrahydromethanopterin reductase)	-	-
CLUSTER1495	4	COG4837	Disulfide oxidoreductase YuzD	-	-
CLUSTER1496	4	COG0789	DNA-binding transcriptional regulator, MerR family	-	-
CLUSTER1497	4	COG0693	Protein/nucleotide deglycase, PfpI/YajL/DJ-1 family (repair of methylglyoxal-glycated proteins and nucleic acids)	K05520	protease I [EC:3.5.1.124]
CLUSTER1498	4	-	-	-	-
CLUSTER1499	4	COG0329	4-hydroxy-tetrahydrodipicolinate synthase/N-acetylneuraminate lyase	K01714	4-hydroxy-tetrahydrodipicolinate synthase [EC:4.3.3.7]
CLUSTER1500	4	COG3279	DNA-binding response regulator, LytR/AlgR family	K07705	two-component system, LytTR family, response regulator LytT
CLUSTER1501	4	COG2739	Predicted DNA-binding protein YlxM, UPF0122 family	K09787	uncharacterized protein
CLUSTER1502	4	COG1473	Metal-dependent amidase/aminoacylase/carboxypeptidase	K05823	N-acetyldiaminopimelate deacetylase [EC:3.5.1.47]
CLUSTER1503	4	COG2814	Predicted arabinose efflux permease AraJ, MFS family	K08221	MFS transporter, ACDE family, multidrug resistance protein
CLUSTER1504	4	COG0714	MoxR-like ATPase	K03924	MoxR-like ATPase [EC:3.6.3.-]
CLUSTER1505	4	COG0384	Predicted epimerase YddE/YHI9, PhzF superfamily	K06998	trans-2,3-dihydro-3-hydroxyanthranilate isomerase [EC:5.3.3.17]
CLUSTER1506	4	COG1247	L-amino acid N-acyltransferase MnaT	-	-
CLUSTER1507	4	COG0526	Thiol-disulfide isomerase or thioredoxin	-	-
CLUSTER1508	4	COG2115	Xylose isomerase	K01805	xylose isomerase [EC:5.3.1.5]
CLUSTER1509	4	COG1193	dsDNA-specific endonuclease/ATPase MutS2	K07456	DNA mismatch repair protein MutS2
CLUSTER1510	4	COG2050	Acyl-CoA thioesterase PaaI, contains HGG motif	K19222	1,4-dihydroxy-2-naphthoyl-CoA hydrolase [EC:3.1.2.28]
CLUSTER1511	4	COG1597	Phosphatidylglycerol kinase, diacylglycerol kinase family	K07029	diacylglycerol kinase (ATP) [EC:2.7.1.107]
CLUSTER1512	4	COG0721	Asp-tRNAAsn/Glu-tRNAGln amidotransferase C subunit	K02435	aspartyl-tRNA(Asn)/glutamyl-tRNA(Gln) amidotransferase subunit C [EC:6.3.5.6 6.3.5.7]
CLUSTER1513	4	COG0294	Dihydropteroate synthase	K00796	dihydropteroate synthase [EC:2.5.1.15]
CLUSTER1514	4	COG2227	2-polyprenyl-3-methyl-5-hydroxy-6-metoxy-1,4-benzoquinol methylase	-	-
CLUSTER1515	4	COG0681	Signal peptidase I	K13280	signal peptidase I [EC:3.4.21.89]
CLUSTER1516	4	COG2199	GGDEF domain, diguanylate cyclase (c-di-GMP synthetase) or its enzymatically inactive variants	-	-
CLUSTER1517	4	COG0205	6-phosphofructokinase	K00850	6-phosphofructokinase 1 [EC:2.7.1.11]
CLUSTER1518	4	COG2183	Transcriptional accessory protein Tex/SPT6	K06959	protein Tex
CLUSTER1519	4	COG0345	Pyrroline-5-carboxylate reductase	K00286	pyrroline-5-carboxylate reductase [EC:1.5.1.2]
CLUSTER1520	4	COG5854	Small acid-soluble spore protein SspF (alpha/beta-type)	K06423	small acid-soluble spore protein F (minor alpha/beta-type SASP)
CLUSTER1521	4	COG0745	DNA-binding response regulator, OmpR family, contains REC and winged-helix (wHTH) domain	-	-
CLUSTER1522	4	COG1876	LD-carboxypeptidase LdcB, LAS superfamily	K07260	zinc D-Ala-D-Ala carboxypeptidase [EC:3.4.17.14]
CLUSTER1523	4	COG1680	CubicO group peptidase, beta-lactamase class C family	-	-
CLUSTER1524	4	COG1802	DNA-binding transcriptional regulator, GntR family	K11476	GntR family transcriptional regulator, gluconate operon transcriptional repressor
CLUSTER1525	4	COG2124	Cytochrome P450	K23138	cytochrome P450 family 109 [EC:1.14.-.-]
CLUSTER1526	4	COG4463	Transcriptional regulator CtsR	K03708	transcriptional regulator of stress and heat shock response
CLUSTER1527	4	COG0176	Transaldolase/fructose-6-phosphate aldolase	K08314	fructose-6-phosphate aldolase 2 [EC:4.1.2.-]
CLUSTER1528	4	COG0693	Protein/nucleotide deglycase, PfpI/YajL/DJ-1 family (repair of methylglyoxal-glycated proteins and nucleic acids)	K03781	catalase [EC:1.11.1.6]
CLUSTER1529	4	COG0548	N-acetylglutamate kinase	K00930	acetylglutamate kinase [EC:2.7.2.8]
CLUSTER1530	4	COG3411	2Fe-2S ferredoxin	-	-
CLUSTER1531	4	-	-	-	-
CLUSTER1532	4	COG1971	Putative Mn2+ efflux pump MntP	-	-
CLUSTER1533	4	COG4753	Two-component response regulator, YesN/AraC family, consists of REC and AraC-type DNA-binding domains	K07719	two-component system, response regulator GlnL
CLUSTER1534	4	COG1514	RNA 2',3'-cyclic phosphodiesterase (2'-5' RNA ligase)	-	-
CLUSTER1535	4	-	-	-	-
CLUSTER1536	4	COG0039	Malate/lactate dehydrogenase	K00016	L-lactate dehydrogenase [EC:1.1.1.27]
CLUSTER1537	4	COG0346	Catechol 2,3-dioxygenase or related enzyme, vicinal oxygen chelate (VOC) family	-	-
CLUSTER1538	4	-	-	-	-
CLUSTER1539	4	COG3395	D-threonate/D-erythronate kinase OtnK and related C4-acid sugar kinases, YgbK/DUF1537 family	K22129	D-threonate/D-erythronate kinase [EC:2.7.1.219 2.7.1.220]
CLUSTER1540	4	COG4129	Uncharacterized membrane protein YgaE, UPF0421/DUF939 family	-	-
CLUSTER1541	4	COG0584	Glycerophosphoryl diester phosphodiesterase	K01126	glycerophosphoryl diester phosphodiesterase [EC:3.1.4.46]
CLUSTER1542	4	COG1686	D-alanyl-D-alanine carboxypeptidase	K07258	serine-type D-Ala-D-Ala carboxypeptidase (penicillin-binding protein 5/6) [EC:3.4.16.4]
CLUSTER1543	4	COG0402	Cytosine/adenosine deaminase or related metal-dependent hydrolase	K12960	5-methylthioadenosine/S-adenosylhomocysteine deaminase [EC:3.5.4.31 3.5.4.28]
CLUSTER1544	4	COG0438	Glycosyltransferase involved in cell wall bisynthesis	K19424	glycosyltransferase EpsF [EC:2.4.-.-]
CLUSTER1545	4	COG0802	tRNA A37 threonylcarbamoyladenosine biosynthesis protein TsaE	K06925	tRNA threonylcarbamoyladenosine biosynthesis protein TsaE
CLUSTER1546	4	COG1125	ABC-type proline/glycine betaine transport system, ATPase component	K05847	osmoprotectant transport system ATP-binding protein [EC:7.6.2.9]
CLUSTER1547	4	COG3256	Nitric oxide reductase large subunit	K04561	nitric oxide reductase subunit B [EC:1.7.2.5]
CLUSTER1548	4	-	-	-	-
CLUSTER1549	4	COG5903	Spore germination receptor GerABC, GerC subunit	K06290	spore germination protein AC
CLUSTER1550	4	COG0737	2',3'-cyclic-nucleotide 2'-phosphodiesterase/5'- or 3'-nucleotidase, 5'-nucleotidase family	K08693	2',3'-cyclic-nucleotide 2'-phosphodiesterase / 3'-nucleotidase / 5'-nucleotidase [EC:3.1.4.16 3.1.3.6 3.1.3.5]
CLUSTER1551	4	-	-	-	-
CLUSTER1552	4	COG0691	tmRNA-binding protein	K03664	SsrA-binding protein
CLUSTER1553	4	COG0291	Ribosomal protein L35	K02916	large subunit ribosomal protein L35
CLUSTER1554	4	COG1215	Glycosyltransferase, catalytic subunit of cellulose synthase and poly-beta-1,6-N-acetylglucosamine synthase	-	-
CLUSTER1555	4	COG0463	Glycosyltransferase involved in cell wall bisynthesis	K19427	glycosyltransferase EpsJ [EC:2.4.-.-]
CLUSTER1556	4	COG0769	UDP-N-acetylmuramyl tripeptide synthase	K01928	UDP-N-acetylmuramoyl-L-alanyl-D-glutamate--2,6-diaminopimelate ligase [EC:6.3.2.13]
CLUSTER1557	4	COG0367	Asparagine synthetase B (glutamine-hydrolyzing)	K01953	asparagine synthase (glutamine-hydrolysing) [EC:6.3.5.4]
CLUSTER1558	4	COG1309	DNA-binding protein, AcrR family, includes nucleoid occlusion protein SlmA	-	-
CLUSTER1559	4	COG0236	Acyl carrier protein	K16119	lichenysin synthetase A
CLUSTER1560	4	COG2271	Sugar phosphate permease	K08194	MFS transporter, ACS family, D-galactonate transporter
CLUSTER1561	4	-	-	-	-
CLUSTER1562	4	-	-	-	-
CLUSTER1563	4	COG1484	DNA replication protein DnaC	K11144	primosomal protein DnaI
CLUSTER1564	4	-	-	-	-
CLUSTER1565	4	COG0642	Signal transduction histidine kinase	K11629	two-component system, OmpR family, bacitracin resistance sensor histidine kinase BceS [EC:2.7.13.3]
CLUSTER1566	4	-	-	-	-
CLUSTER1567	4	COG0036	Pentose-5-phosphate-3-epimerase	K01783	ribulose-phosphate 3-epimerase [EC:5.1.3.1]
CLUSTER1568	4	COG5871	Spore cortex protein YqfC, YabP family	-	-
CLUSTER1569	4	COG0219	tRNA(Leu) C34 or U34 (ribose-2'-O)-methylase TrmL, contains SPOUT domain	K03216	tRNA (cytidine/uridine-2'-O-)-methyltransferase [EC:2.1.1.207]
CLUSTER1570	4	COG3866	Pectate lyase	K01728	pectate lyase [EC:4.2.2.2]
CLUSTER1571	4	COG1286	Colicin V production accessory protein CvpA, regulator of purF expression and biofilm formation	-	-
CLUSTER1572	4	COG0085	DNA-directed RNA polymerase, beta subunit/140 kD subunit	K03043	DNA-directed RNA polymerase subunit beta [EC:2.7.7.6]
CLUSTER1573	4	COG3333	TctA family transporter	K07793	putative tricarboxylic transport membrane protein
CLUSTER1574	4	COG5900	Spore coat protein YybI (inner spore coat)	-	-
CLUSTER1575	4	COG0784;COG0835	CheY-like REC (receiver) domain, includes chemotaxis protein CheY and sporulation regulator Spo0F;Chemotaxis signal transduction protein CheW	K03415	two-component system, chemotaxis family, chemotaxis protein CheV
CLUSTER1576	4	-	-	-	-
CLUSTER1577	4	COG2318	Bacillithiol/mycothiol S-transferase BstA/DinB, DinB/YfiT family (unrelated to E. coli DinB)	-	-
CLUSTER1578	4	COG0796	Glutamate racemase	K01776	glutamate racemase [EC:5.1.1.3]
CLUSTER1579	4	COG2155	Uncharacterized membrane protein YuzA, DUF378 family	K09779	uncharacterized protein
CLUSTER1580	4	COG0768	Cell division protein FtsI, peptidoglycan transpeptidase (Penicillin-binding protein 2)	K21466	penicillin-binding protein H
CLUSTER1581	4	COG4329	Uncharacterized membrane protein, DUF2243 domain	-	-
CLUSTER1582	4	COG5819	Stage II sporulation protein SpoIIP, required for dissolution of the septal cell wall	K06385	stage II sporulation protein P
CLUSTER1583	4	COG0697	Permease of the drug/metabolite transporter (DMT) superfamily	-	-
CLUSTER1584	4	COG1735	Predicted metal-dependent hydrolase, phosphotriesterase family	K07048	phosphotriesterase-related protein
CLUSTER1585	4	-	-	-	-
CLUSTER1586	4	COG1647	Esterase/lipase	K03928	carboxylesterase [EC:3.1.1.1]
CLUSTER1587	4	COG0601	ABC-type dipeptide/oligopeptide/nickel transport system, permease component	K02033	peptide/nickel transport system permease protein
CLUSTER1588	4	COG0558	Phosphatidylglycerophosphate synthase	K00995	CDP-diacylglycerol---glycerol-3-phosphate 3-phosphatidyltransferase [EC:2.7.8.5]
CLUSTER1589	4	COG3315	O-Methyltransferase involved in polyketide biosynthesis	-	-
CLUSTER1590	4	COG1982	Arginine/lysine/ornithine decarboxylase	K01585	arginine decarboxylase [EC:4.1.1.19]
CLUSTER1591	4	COG0572	Uridine kinase	K00876	uridine kinase [EC:2.7.1.48]
CLUSTER1592	4	COG1942	Phenylpyruvate tautomerase PptA, 4-oxalocrotonate tautomerase family	-	-
CLUSTER1593	4	-	-	-	-
CLUSTER1594	4	COG1012	Acyl-CoA reductase or other NAD-dependent aldehyde dehydrogenase	K00130	betaine-aldehyde dehydrogenase [EC:1.2.1.8]
CLUSTER1595	4	COG2172	Anti-sigma regulatory factor (Ser/Thr protein kinase)	K06379	stage II sporulation protein AB (anti-sigma F factor) [EC:2.7.11.1]
CLUSTER1596	4	-	-	-	-
CLUSTER1597	4	COG0297	Glycogen synthase	K00703	starch synthase [EC:2.4.1.21]
CLUSTER1598	4	COG1748	Saccharopine dehydrogenase, NADP-dependent	K00290	saccharopine dehydrogenase (NAD+, L-lysine forming) [EC:1.5.1.7]
CLUSTER1599	4	-	-	-	-
CLUSTER1600	4	COG0091	Ribosomal protein L22	K02890	large subunit ribosomal protein L22
CLUSTER1601	4	COG4493	Uncharacterized conserved protein YktB, UPF0637 family	-	-
CLUSTER1602	4	COG0431	NAD(P)H-dependent FMN reductase	K03206	azobenzene reductase [EC:1.7.1.6]
CLUSTER1603	4	COG0693	Protein/nucleotide deglycase, PfpI/YajL/DJ-1 family (repair of methylglyoxal-glycated proteins and nucleic acids)	K05520	protease I [EC:3.5.1.124]
CLUSTER1604	4	COG1377	Flagellar biosynthesis protein FlhB	K02401	flagellar biosynthesis protein FlhB
CLUSTER1605	4	COG5906	Spore germination protein GerPA/GerPF (inner spore coat)	K06304	spore germination protein PF
CLUSTER1606	4	-	-	-	-
CLUSTER1607	4	COG2843	Poly-gamma-glutamate biosynthesis protein CapA/YwtB (capsule formation), metallophosphatase superfamily	K07282	gamma-polyglutamate biosynthesis protein CapA
CLUSTER1608	4	COG0510	Thiamine kinase or a related kinase	-	-
CLUSTER1609	4	COG1846	DNA-binding transcriptional regulator, MarR family	-	-
CLUSTER1610	4	COG4942	Septal ring factor EnvC, activator of murein hydrolases AmiA and AmiB	-	-
CLUSTER1611	4	COG1609	DNA-binding transcriptional regulator, LacI/PurR family	-	-
CLUSTER1612	4	COG5865	Forespore-specific anti-sigma-G factor CsfB/Gin	-	-
CLUSTER1613	4	COG1294	Cytochrome bd-type quinol oxidase, subunit 2	K00426	cytochrome bd ubiquinol oxidase subunit II [EC:7.1.1.7]
CLUSTER1614	4	COG2508	DNA-binding transcriptional regulator, PucR/PutR family	K09684	PucR family transcriptional regulator, purine catabolism regulatory protein
CLUSTER1615	4	COG1131	ABC-type multidrug transport system, ATPase component	K01990	ABC-2 type transport system ATP-binding protein
CLUSTER1616	4	COG1174	ABC-type proline/glycine betaine transport system, permease component	K05846	osmoprotectant transport system permease protein
CLUSTER1617	4	COG1501	Alpha-glucosidase/xylosidase, GH31 family	K01187	alpha-glucosidase [EC:3.2.1.20]
CLUSTER1618	4	COG1496	Copper oxidase (laccase) domain	K05810	polyphenol oxidase [EC:1.10.3.-]
CLUSTER1619	4	COG0575	CDP-diglyceride synthetase	K00981	phosphatidate cytidylyltransferase [EC:2.7.7.41]
CLUSTER1620	4	COG1304	FMN-dependent dehydrogenase, includes L-lactate dehydrogenase and type II isopentenyl diphosphate isomerase	K01823	isopentenyl-diphosphate Delta-isomerase [EC:5.3.3.2]
CLUSTER1621	4	COG5912	Spore cortex protein CoxA (YrbB), YhcN/YlaJ family	-	-
CLUSTER1622	4	COG0296	1,4-alpha-glucan branching enzyme	K00700	1,4-alpha-glucan branching enzyme [EC:2.4.1.18]
CLUSTER1623	4	COG1621	Sucrose-6-phosphate hydrolase SacC, GH32 family	K03332	fructan beta-fructosidase [EC:3.2.1.80]
CLUSTER1624	4	COG0198	Ribosomal protein L24	K02895	large subunit ribosomal protein L24
CLUSTER1625	4	COG0412	Dienelactone hydrolase	-	-
CLUSTER1626	4	COG1284	Uncharacterized membrane-anchored protein YitT, contains DUF161 and DUF2179 domains	-	-
CLUSTER1627	4	COG0626	Cystathionine beta-lyase/cystathionine gamma-synthase	K01739	cystathionine gamma-synthase [EC:2.5.1.48]
CLUSTER1628	4	COG2827	Predicted endonuclease, GIY-YIG superfamily	K07461	putative endonuclease
CLUSTER1629	4	COG2195	Di- or tripeptidase	K01258	tripeptide aminopeptidase [EC:3.4.11.4]
CLUSTER1630	4	COG2390	DNA-binding transcriptional regulator LsrR, DeoR family	K05346	deoxyribonucleoside regulator
CLUSTER1631	4	COG3764	Sortase (surface protein transpeptidase)	K07284	sortase A [EC:3.4.22.70]
CLUSTER1632	4	COG0465	ATP-dependent Zn proteases	K03798	cell division protease FtsH [EC:3.4.24.-]
CLUSTER1633	4	COG2197	DNA-binding response regulator, NarL/FixJ family, contains REC and HTH domains	K07691	two-component system, NarL family, competent response regulator ComA
CLUSTER1634	4	COG4974	Site-specific recombinase XerD	-	-
CLUSTER1635	4	COG0744	Penicillin-binding protein 1B/1F, peptidoglycan transglycosylase/transpeptidase	K12555	penicillin-binding protein 2A [EC:2.4.1.129 3.4.16.4]
CLUSTER1636	4	COG0477	MFS family permease, includes anhydromuropeptide permease AmpG	-	-
CLUSTER1637	4	-	-	K06356	phosphatase RapG regulator
CLUSTER1638	4	COG1762;COG1299	Phosphotransferase system mannitol/fructose-specific IIA domain (Ntr-type);Phosphotransferase system, fructose-specific IIC component	K02770	fructose PTS system EIIBC or EIIC component [EC:2.7.1.202]
CLUSTER1639	4	-	-	-	-
CLUSTER1640	4	COG0799	Ribosomal silencing factor RsfS, regulates association of 30S and 50S subunits	K09710	ribosome-associated protein
CLUSTER1641	4	COG3611	Replication initiation and membrane attachment protein DnaB	K03346	replication initiation and membrane attachment protein
CLUSTER1642	4	COG0508	Pyruvate/2-oxoglutarate dehydrogenase complex, dihydrolipoamide acyltransferase (E2) component	K00627	pyruvate dehydrogenase E2 component (dihydrolipoamide acetyltransferase) [EC:2.3.1.12]
CLUSTER1643	4	COG2808	Predicted FMN-binding regulatory protein PaiB	K07734	transcriptional regulator
CLUSTER1644	4	-	-	-	-
CLUSTER1645	4	COG0456	Ribosomal protein S18 acetylase RimI and related acetyltransferases	-	-
CLUSTER1646	4	COG0529	Adenylylsulfate kinase or related kinase	K00860	adenylylsulfate kinase [EC:2.7.1.25]
CLUSTER1647	4	COG0345	Pyrroline-5-carboxylate reductase	K00286	pyrroline-5-carboxylate reductase [EC:1.5.1.2]
CLUSTER1648	4	COG1309	DNA-binding protein, AcrR family, includes nucleoid occlusion protein SlmA	-	-
CLUSTER1649	4	COG5417	ESX protein secretion system component YukD	-	-
CLUSTER1650	4	COG1501	Alpha-glucosidase/xylosidase, GH31 family	K01811	alpha-D-xyloside xylohydrolase [EC:3.2.1.177]
CLUSTER1651	4	COG0711	FoF1-type ATP synthase, membrane subunit b or b'	K02109	F-type H+-transporting ATPase subunit b
CLUSTER1652	4	-	-	K02253	competence protein ComX
CLUSTER1653	4	COG3290;COG0840	Sensor histidine kinase DipB regulating citrate/malate metabolism;Methyl-accepting chemotaxis protein (MCP)	K03406	methyl-accepting chemotaxis protein
CLUSTER1654	4	COG0162	Tyrosyl-tRNA synthetase	K01866	tyrosyl-tRNA synthetase [EC:6.1.1.1]
CLUSTER1655	4	COG3507	Beta-xylosidase	K06113	arabinan endo-1,5-alpha-L-arabinosidase [EC:3.2.1.99]
CLUSTER1656	4	COG0324	tRNA A37 N6-isopentenylltransferase MiaA	K00791	tRNA dimethylallyltransferase [EC:2.5.1.75]
CLUSTER1657	4	COG0614	ABC-type Fe3+-hydroxamate transport system, periplasmic component	K02016	iron complex transport system substrate-binding protein
CLUSTER1658	4	COG1309	DNA-binding protein, AcrR family, includes nucleoid occlusion protein SlmA	-	-
CLUSTER1659	4	COG0154	Asp-tRNAAsn/Glu-tRNAGln amidotransferase A subunit or related amidase	K02433	aspartyl-tRNA(Asn)/glutamyl-tRNA(Gln) amidotransferase subunit A [EC:6.3.5.6 6.3.5.7]
CLUSTER1660	4	COG0564	Pseudouridine synthase RluA, 23S rRNA- or tRNA-specific	K06180	23S rRNA pseudouridine1911/1915/1917 synthase [EC:5.4.99.23]
CLUSTER1661	4	COG5839	Stage V sporulation protein SpoVAEB, subunit of dipicolinate uptake complex	K06407	stage V sporulation protein AE
CLUSTER1662	4	COG0726	Peptidoglycan/xylan/chitin deacetylase, PgdA/NodB/CDA1 family	-	-
CLUSTER1663	4	COG2910	Putative NADH-flavin reductase	K07118	uncharacterized protein
CLUSTER1664	4	COG1251	NAD(P)H-nitrite reductase, large subunit	K00362	nitrite reductase (NADH) large subunit [EC:1.7.1.15]
CLUSTER1665	4	-	-	-	-
CLUSTER1666	4	COG1968	Undecaprenyl pyrophosphate phosphatase	K06153	undecaprenyl-diphosphatase [EC:3.6.1.27]
CLUSTER1667	4	COG1015	Phosphopentomutase	K01839	phosphopentomutase [EC:5.4.2.7]
CLUSTER1668	4	-	-	-	-
CLUSTER1669	4	COG1764	Organic hydroperoxide reductase OsmC/OhrA	-	-
CLUSTER1670	4	COG0518	GMP synthase, glutamine amidotransferase domain	K01951	GMP synthase (glutamine-hydrolysing) [EC:6.3.5.2]
CLUSTER1671	4	COG1358	Ribosomal protein L7Ae or related RNA K-turn-binding protein	K07590	large subunit ribosomal protein L7A
CLUSTER1672	4	COG5891	Spore coat protein YheC/YheD, ATP-grasp superfamily	-	-
CLUSTER1673	4	COG0745	DNA-binding response regulator, OmpR family, contains REC and winged-helix (wHTH) domain	K02483	two-component system, OmpR family, response regulator
CLUSTER1674	4	COG0243	Anaerobic selenocysteine-containing dehydrogenase	-	-
CLUSTER1675	4	COG4347	Uncharacterized membrane protein YpjA	-	-
CLUSTER1676	4	COG3545	Predicted esterase of the alpha/beta hydrolase fold	K07002	uncharacterized protein
CLUSTER1677	4	COG2322	Predicted membrane metallochaperone YozB (3H, Sco1 fusion), DUF420 family	K08976	putative membrane protein
CLUSTER1678	4	-	-	-	-
CLUSTER1679	4	COG0247;COG2181	Fe-S cluster-containing oxidoreductase, includes glycolate oxidase subunit GlcF;Nitrate reductase gamma subunit	-	-
CLUSTER1680	4	COG1418	HD superfamily phosphodieaserase, includes HD domain of RNase Y	K06950	uncharacterized protein
CLUSTER1681	4	COG3866	Pectate lyase	K01728	pectate lyase [EC:4.2.2.2]
CLUSTER1682	4	COG0061	NAD kinase	K00858	NAD+ kinase [EC:2.7.1.23]
CLUSTER1683	4	COG5912	Spore cortex protein CoxA (YrbB), YhcN/YlaJ family	-	-
CLUSTER1684	4	-	-	-	-
CLUSTER1685	4	COG0745	DNA-binding response regulator, OmpR family, contains REC and winged-helix (wHTH) domain	K07775	two-component system, OmpR family, response regulator ResD
CLUSTER1686	4	COG0199	Ribosomal protein S14	K02954	small subunit ribosomal protein S14
CLUSTER1687	4	-	-	-	-
CLUSTER1688	4	COG3855	Fructose-1,6-bisphosphatase	K04041	fructose-1,6-bisphosphatase III [EC:3.1.3.11]
CLUSTER1689	4	COG4336	Uncharacterized conserved protein YcsI, UPF0317/DUF1446 family	-	-
CLUSTER1690	4	-	-	-	-
CLUSTER1691	4	COG1875	Predicted ribonuclease YlaK, contains NYN-type RNase and PhoH-family ATPase domains	K07175	PhoH-like ATPase
CLUSTER1692	4	-	-	-	-
CLUSTER1693	4	COG0614	ABC-type Fe3+-hydroxamate transport system, periplasmic component	K02016	iron complex transport system substrate-binding protein
CLUSTER1694	4	COG2255	Holliday junction resolvasome RuvABC, ATP-dependent DNA helicase subunit RuvB	K03551	holliday junction DNA helicase RuvB [EC:3.6.4.12]
CLUSTER1695	4	COG2135	ssDNA abasic site-binding protein YedK/HMCES, SRAP family	-	-
CLUSTER1696	4	COG2271	Sugar phosphate permease	-	-
CLUSTER1697	4	COG0438	Glycosyltransferase involved in cell wall bisynthesis	K16697	teichuronic acid biosynthesis glycosyltransferase TuaC [EC:2.4.-.-]
CLUSTER1698	4	COG1354	Chromatin segregation and condensation protein Rec8/ScpA/Scc1, kleisin family	K05896	segregation and condensation protein A
CLUSTER1699	4	COG0026	Phosphoribosylaminoimidazole carboxylase (NCAIR synthetase)	K01589	5-(carboxyamino)imidazole ribonucleotide synthase [EC:6.3.4.18]
CLUSTER1700	4	-	-	-	-
CLUSTER1701	4	COG0456	Ribosomal protein S18 acetylase RimI and related acetyltransferases	-	-
CLUSTER1702	4	COG0491	Glyoxylase or a related metal-dependent hydrolase, beta-lactamase superfamily II	-	-
CLUSTER1703	4	COG0460	Homoserine dehydrogenase	K00003	homoserine dehydrogenase [EC:1.1.1.3]
CLUSTER1704	4	-	-	-	-
CLUSTER1705	4	-	-	-	-
CLUSTER1706	4	COG2814	Predicted arabinose efflux permease AraJ, MFS family	-	-
CLUSTER1707	4	COG2814	Predicted arabinose efflux permease AraJ, MFS family	K08161	MFS transporter, DHA1 family, multidrug resistance protein
CLUSTER1708	4	COG0698	Ribose 5-phosphate isomerase RpiB	K01808	ribose 5-phosphate isomerase B [EC:5.3.1.6]
CLUSTER1709	4	COG0257	Ribosomal protein L36	K02919	large subunit ribosomal protein L36
CLUSTER1710	4	COG1609	DNA-binding transcriptional regulator, LacI/PurR family	K02529	LacI family transcriptional regulator
CLUSTER1711	4	COG0654	2-polyprenyl-6-methoxyphenol hydroxylase and related FAD-dependent oxidoreductases	-	-
CLUSTER1712	4	-	-	-	-
CLUSTER1713	4	-	-	-	-
CLUSTER1714	4	COG3731	Phosphotransferase system sorbitol-specific IIA component	K02781	glucitol/sorbitol PTS system EIIA component [EC:2.7.1.198]
CLUSTER1715	4	COG1846	DNA-binding transcriptional regulator, MarR family	-	-
CLUSTER1716	4	COG5893	Spore coat protein YmaG	-	-
CLUSTER1717	4	COG1978	Predicted RNase H-related nuclease YkuK, DUF458 family	K09776	uncharacterized protein
CLUSTER1718	4	COG2088	DNA-binding protein SpoVG, cell septation regulator	K06412	stage V sporulation protein G
CLUSTER1719	4	COG0567	2-oxoglutarate dehydrogenase complex, dehydrogenase (E1) component, and related enzymes	K00164	2-oxoglutarate dehydrogenase E1 component [EC:1.2.4.2]
CLUSTER1720	4	COG2819	Predicted hydrolase of the alpha/beta superfamily	K07017	uncharacterized protein
CLUSTER1721	4	COG2814	Predicted arabinose efflux permease AraJ, MFS family	K06610	MFS transporter, SP family, inositol transporter
CLUSTER1722	4	COG2311	Uncharacterized membrane protein YeiB	-	-
CLUSTER1723	4	-	-	-	-
CLUSTER1724	4	-	-	-	-
CLUSTER1725	4	COG0318	O-succinylbenzoic acid-CoA ligase MenE or related acyl-CoA synthetase (AMP-forming)	K01897	long-chain acyl-CoA synthetase [EC:6.2.1.3]
CLUSTER1726	4	COG2320	GrpB domain, predicted nucleotidyltransferase, UPF0157 family	-	-
CLUSTER1727	4	COG2323	Uncharacterized membrane protein YcaP, DUF421 family	-	-
CLUSTER1728	4	COG0030	16S rRNA A1518 and A1519 N6-dimethyltransferase RsmA/KsgA/DIM1 (may also have DNA glycosylase/AP lyase activity)	K00561	23S rRNA (adenine-N6)-dimethyltransferase [EC:2.1.1.184]
CLUSTER1729	4	COG0282	Acetate kinase	K00925	acetate kinase [EC:2.7.2.1]
CLUSTER1730	4	COG1291	Flagellar motor component MotA	K02556	chemotaxis protein MotA
CLUSTER1731	4	COG0624	Acetylornithine deacetylase/Succinyl-diaminopimelate desuccinylase or related deacylase	K02083	allantoate deiminase [EC:3.5.3.9]
CLUSTER1732	4	COG2208	Phosphoserine phosphatase RsbU, regulator of sigma subunit	K07315	phosphoserine phosphatase RsbU/P [EC:3.1.3.3]
CLUSTER1733	4	COG0642	Signal transduction histidine kinase	K20487	two-component system, OmpR family, lantibiotic biosynthesis sensor histidine kinase NisK/SpaK [EC:2.7.13.3]
CLUSTER1734	4	COG1028	NAD(P)-dependent dehydrogenase, short-chain alcohol dehydrogenase family	-	-
CLUSTER1735	4	COG1620	L-lactate permease	K03303	lactate permease
CLUSTER1736	4	COG2223	Nitrate/nitrite transporter NarK	K02532	MFS transporter, OHS family, lactose permease
CLUSTER1737	4	COG0432	Thiamin phosphate synthase YjbQ, UPF0047 family	-	-
CLUSTER1738	4	COG0325	Pyridoxal 5'-phosphate homeostasis protein YggS, UPF0001 family	K06997	PLP dependent protein
CLUSTER1739	4	COG3401	Fibronectin type 3 domain	K01179	endoglucanase [EC:3.2.1.4]
CLUSTER1740	4	COG0828	Ribosomal protein S21	K02970	small subunit ribosomal protein S21
CLUSTER1741	4	COG0517	CBS domain	-	-
CLUSTER1742	4	COG2217	Cation-transporting P-type ATPase	K17686	P-type Cu+ transporter [EC:7.2.2.8]
CLUSTER1743	4	COG2814	Predicted arabinose efflux permease AraJ, MFS family	-	-
CLUSTER1744	4	COG1942	Phenylpyruvate tautomerase PptA, 4-oxalocrotonate tautomerase family	K01821	4-oxalocrotonate tautomerase [EC:5.3.2.6]
CLUSTER1745	4	COG0253	Diaminopimelate epimerase	K01778	diaminopimelate epimerase [EC:5.1.1.7]
CLUSTER1746	4	COG0571	dsRNA-specific ribonuclease	K03685	ribonuclease III [EC:3.1.26.3]
CLUSTER1747	4	COG0392	Predicted membrane flippase AglD2/YbhN, UPF0104 family	K14205	phosphatidylglycerol lysyltransferase [EC:2.3.2.3]
CLUSTER1748	4	COG1972	Nucleoside permease NupC	K16323	purine nucleoside transport protein
CLUSTER1749	4	-	-	-	-
CLUSTER1750	4	COG0527	Aspartate kinase	K00928	aspartate kinase [EC:2.7.2.4]
CLUSTER1751	4	-	-	-	-
CLUSTER1752	4	COG3711	Transcriptional antiterminator	K03488	beta-glucoside operon transcriptional antiterminator
CLUSTER1753	4	COG3732	Phosphotransferase system sorbitol-specific IIB component	K02782	glucitol/sorbitol PTS system EIIB component [EC:2.7.1.198]
CLUSTER1754	4	COG0307	Riboflavin synthase alpha chain	K00793	riboflavin synthase [EC:2.5.1.9]
CLUSTER1755	4	COG0681	Signal peptidase I	K03100	signal peptidase I [EC:3.4.21.89]
CLUSTER1756	4	COG1695	DNA-binding transcriptional regulator, PadR family	-	-
CLUSTER1757	4	COG1169	Isochorismate synthase EntC	K02361	isochorismate synthase [EC:5.4.4.2]
CLUSTER1758	4	COG0584	Glycerophosphoryl diester phosphodiesterase	K01126	glycerophosphoryl diester phosphodiesterase [EC:3.1.4.46]
CLUSTER1759	4	COG0011	Thiamin-binding stress-response protein YqgV, UPF0045 family	-	-
CLUSTER1760	4	COG0486	tRNA U34 5-carboxymethylaminomethyl modifying GTPase MnmE/TrmE	K03650	tRNA modification GTPase [EC:3.6.-.-]
CLUSTER1761	4	-	-	-	-
CLUSTER1762	4	-	-	-	-
CLUSTER1763	4	COG0812	UDP-N-acetylenolpyruvoylglucosamine reductase	K00075	UDP-N-acetylmuramate dehydrogenase [EC:1.3.1.98]
CLUSTER1764	4	COG5876	Uncharacterized sporulation protein YozQ	-	-
CLUSTER1765	4	COG0457	Tetratricopeptide (TPR) repeat	K06365	response regulator aspartate phosphatase G [EC:3.1.-.-]
CLUSTER1766	4	-	-	-	-
CLUSTER1767	4	COG1028	NAD(P)-dependent dehydrogenase, short-chain alcohol dehydrogenase family	K03366	meso-butanediol dehydrogenase / (S,S)-butanediol dehydrogenase / diacetyl reductase [EC:1.1.1.- 1.1.1.76 1.1.1.304]
CLUSTER1768	4	COG2868	Uncharacterized conserved protein YsxB, DUF464 family	K07584	uncharacterized protein
CLUSTER1769	4	COG1815	Flagellar basal body rod protein FlgB	K02387	flagellar basal-body rod protein FlgB
CLUSTER1770	4	COG1670	Protein N-acetyltransferase, RimJ/RimL family	-	-
CLUSTER1771	4	COG1944	Ribosomal protein S12 methylthiotransferase accessory factor YcaO	K09136	ribosomal protein S12 methylthiotransferase accessory factor
CLUSTER1772	4	COG2124	Cytochrome P450	K16593	pimeloyl-[acyl-carrier protein] synthase [EC:1.14.14.46]
CLUSTER1773	4	COG5815	Stage II sporulation protein SpoIIAA (antagonist of anti-sigma F factor)	K04749	anti-sigma B factor antagonist
CLUSTER1774	4	COG5921	Uncharacterized sporulation protein YqfX, contains DUF308 domain	-	-
CLUSTER1775	4	-	-	-	-
CLUSTER1776	4	COG3428	Uncharacterized membrane protein YdbT, contains bPH2 (bacterial pleckstrin homology) domain	K08981	putative membrane protein
CLUSTER1777	4	COG0789	DNA-binding transcriptional regulator, MerR family	K19575	MerR family transcriptional regulator, activator of bmr gene
CLUSTER1778	4	-	-	-	-
CLUSTER1779	4	-	-	-	-
CLUSTER1780	4	COG0051	Ribosomal protein S10	K02946	small subunit ribosomal protein S10
CLUSTER1781	4	COG0778	Nitroreductase	K19285	FMN reductase (NADPH) [EC:1.5.1.38]
CLUSTER1782	4	COG1086	NDP-sugar epimerase, includes UDP-GlcNAc-inverting 4,6-dehydratase FlaA1 and capsular polysaccharide biosynthesis protein EpsC	K15894	UDP-N-acetylglucosamine 4,6-dehydratase/5-epimerase [EC:4.2.1.115 5.1.3.-]
CLUSTER1783	4	COG3956	Uncharacterized conserved protein YabN, contains tetrapyrrole methylase and MazG-like pyrophosphatase domain	K02499	tetrapyrrole methylase family protein / MazG family protein
CLUSTER1784	4	COG0359	Ribosomal protein L9	K02939	large subunit ribosomal protein L9
CLUSTER1785	4	COG1167	DNA-binding transcriptional regulator, MocR family, contains an aminotransferase domain	K00375	GntR family transcriptional regulator / MocR family aminotransferase
CLUSTER1786	4	COG0643	Chemotaxis protein histidine kinase CheA	K03407	two-component system, chemotaxis family, sensor kinase CheA [EC:2.7.13.3]
CLUSTER1787	4	COG4195	Phage-related replication protein YjqB, UPF0714/DUF867 family	-	-
CLUSTER1788	4	COG1566	Multidrug resistance efflux pump EmrA	-	-
CLUSTER1789	4	COG2378	Predicted DNA-binding transcriptional regulator YobV, contains HTH and WYL domains	-	-
CLUSTER1790	4	COG0523	Zinc metallochaperone YeiR/ZagA and related GTPases, G3E family	-	-
CLUSTER1791	4	COG0160	Acetylornithine aminotransferase/4-aminobutyrate aminotransferase	K00836	diaminobutyrate-2-oxoglutarate transaminase [EC:2.6.1.76]
CLUSTER1792	4	COG0239	Fluoride ion exporter CrcB/FEX, affects chromosome condensation	K06199	fluoride exporter
CLUSTER1793	4	COG1547	Predicted metal-dependent hydrolase	K09763	uncharacterized protein
CLUSTER1794	4	COG1159	GTPase Era, involved in 16S rRNA processing	K03595	GTPase
CLUSTER1795	4	COG1593	TRAP-type C4-dicarboxylate transport system, large permease component	-	-
CLUSTER1796	4	-	-	-	-
CLUSTER1797	4	COG0599	Uncharacterized conserved protein YurZ, alkylhydroperoxidase/carboxymuconolactone decarboxylase family	-	-
CLUSTER1798	4	COG1012	Acyl-CoA reductase or other NAD-dependent aldehyde dehydrogenase	K10217	aminomuconate-semialdehyde/2-hydroxymuconate-6-semialdehyde dehydrogenase [EC:1.2.1.32 1.2.1.85]
CLUSTER1799	4	-	-	-	-
CLUSTER1800	4	COG1442	Lipopolysaccharide biosynthesis protein, LPS:glycosyltransferase	-	-
CLUSTER1801	4	COG1246	N-acetylglutamate synthase or related acetyltransferase, GNAT family	-	-
CLUSTER1802	4	COG0740	ATP-dependent protease ClpP, protease subunit	-	-
CLUSTER1803	4	COG1024	Enoyl-CoA hydratase/carnithine racemase	K13767	enoyl-CoA hydratase [EC:4.2.1.17]
CLUSTER1804	4	-	-	-	-
CLUSTER1805	4	-	-	-	-
CLUSTER1806	4	COG1580	Flagellar basal body-associated protein FliL	K02415	flagellar protein FliL
CLUSTER1807	4	COG2190	Phosphotransferase system IIA component	K02777	sugar PTS system EIIA component [EC:2.7.1.-]
CLUSTER1808	4	COG0306	Phosphate/sulfate permease	K03306	inorganic phosphate transporter, PiT family
CLUSTER1809	4	COG3253	Coproheme decarboxylase/chlorite dismutase	K00435	hydrogen peroxide-dependent heme synthase [EC:1.3.98.5]
CLUSTER1810	4	COG1396	Transcriptional regulator, contains XRE-family HTH domain	-	-
CLUSTER1811	4	COG0399	dTDP-4-amino-4,6-dideoxygalactose transaminase	K19430	pyridoxal phosphate-dependent aminotransferase EpsN [EC:2.6.1.-]
CLUSTER1812	4	COG1762;COG3711	Phosphotransferase system mannitol/fructose-specific IIA domain (Ntr-type);Transcriptional antiterminator	K03491	lichenan operon transcriptional antiterminator
CLUSTER1813	4	COG1668	ABC-type Na+ efflux pump, permease component NatB	K01992	ABC-2 type transport system permease protein
CLUSTER1814	4	COG1263	Phosphotransferase system IIC components, glucose/maltose/N-acetylglucosamine-specific	K02757	beta-glucoside PTS system EIICBA component [EC:2.7.1.-]
CLUSTER1815	4	COG0821	4-hydroxy-3-methylbut-2-en-1-yl diphosphate synthase IspG/GcpE	K03526	(E)-4-hydroxy-3-methylbut-2-enyl-diphosphate synthase [EC:1.17.7.1 1.17.7.3]
CLUSTER1816	4	COG0346	Catechol 2,3-dioxygenase or related enzyme, vicinal oxygen chelate (VOC) family	K01759	lactoylglutathione lyase [EC:4.4.1.5]
CLUSTER1817	4	COG2059	Chromate transport protein ChrA	K07240	chromate transporter
CLUSTER1818	4	COG0534	Na+-driven multidrug efflux pump, DinF/NorM/MATE family	-	-
CLUSTER1819	4	COG1214	tRNA A37 threonylcarbamoyladenosine modification protein TsaB	K14742	tRNA threonylcarbamoyladenosine biosynthesis protein TsaB
CLUSTER1820	4	-	-	-	-
CLUSTER1821	4	COG0148	Enolase	K01689	enolase [EC:4.2.1.11]
CLUSTER1822	4	COG2076	Multidrug transporter EmrE and related cation transporters	-	-
CLUSTER1823	4	COG1305	Transglutaminase-like enzyme, putative cysteine protease	-	-
CLUSTER1824	4	COG0608	ssDNA-specific exonuclease RecJ, DHH superfamily, may be involved in archaeal DNA replication intiation	K07462	single-stranded-DNA-specific exonuclease [EC:3.1.-.-]
CLUSTER1825	4	COG1141	Ferredoxin	K05337	ferredoxin
CLUSTER1826	4	COG1263	Phosphotransferase system IIC components, glucose/maltose/N-acetylglucosamine-specific	K02757	beta-glucoside PTS system EIICBA component [EC:2.7.1.-]
CLUSTER1827	4	COG0384	Predicted epimerase YddE/YHI9, PhzF superfamily	-	-
CLUSTER1828	4	COG1609	DNA-binding transcriptional regulator, LacI/PurR family	-	-
CLUSTER1829	4	COG0314	Molybdopterin synthase catalytic subunit MoaE	K03635	molybdopterin synthase catalytic subunit [EC:2.8.1.12]
CLUSTER1830	4	-	-	-	-
CLUSTER1831	4	-	-	-	-
CLUSTER1832	4	COG0005	Purine nucleoside phosphorylase	K03783	purine-nucleoside phosphorylase [EC:2.4.2.1]
CLUSTER1833	4	COG0503	Adenine/guanine phosphoribosyltransferase or related PRPP-binding protein	K09685	purine operon repressor
CLUSTER1834	4	COG3336	Cytochrome c oxidase assembly protein CtaG	K02862	putative membrane protein
CLUSTER1835	4	COG0373	Glutamyl-tRNA reductase	K02492	glutamyl-tRNA reductase [EC:1.2.1.70]
CLUSTER1836	4	COG2205	K+-sensing histidine kinase KdpD	-	-
CLUSTER1837	4	COG1075	Triacylglycerol esterase/lipase EstA, alpha/beta hydrolase fold	K01046	triacylglycerol lipase [EC:3.1.1.3]
CLUSTER1838	4	COG0161	Adenosylmethionine-8-amino-7-oxononanoate aminotransferase	-	-
CLUSTER1839	4	COG0323	DNA mismatch repair ATPase MutL	K03572	DNA mismatch repair protein MutL
CLUSTER1840	4	-	-	-	-
CLUSTER1841	4	COG4980	Gas vesicle protein YhaH	-	-
CLUSTER1842	4	COG2186	DNA-binding transcriptional regulator, FadR family	K05799	GntR family transcriptional regulator, transcriptional repressor for pyruvate dehydrogenase complex
CLUSTER1843	4	COG4753	Two-component response regulator, YesN/AraC family, consists of REC and AraC-type DNA-binding domains	K07720	two-component system, response regulator YesN
CLUSTER1844	4	COG0778	Nitroreductase	K19286	FMN reductase [NAD(P)H] [EC:1.5.1.39]
CLUSTER1845	4	COG1755	Uncharacterized conserved protein YpbQ, isoprenylcysteine carboxyl methyltransferase (ICMT) family	K16168	methyltransferase
CLUSTER1846	4	COG5835	Stage V sporulation protein SpoVAB, subunit of dipicolinate uptake complex	K06404	stage V sporulation protein AB
CLUSTER1847	4	COG1176	ABC-type spermidine/putrescine transport system, permease component I	K02054	putative spermidine/putrescine transport system permease protein
CLUSTER1848	4	COG1713	Diadenosine tetraphosphatase YqeK or a related HD superfamily phosphohydrolase	-	-
CLUSTER1849	4	COG1846	DNA-binding transcriptional regulator, MarR family	-	-
CLUSTER1850	4	COG5869	Spore cortex formation membrane protein YabQ	-	-
CLUSTER1851	4	COG0464	AAA+-type ATPase, SpoVK/Ycf46/Vps4 family	K03798	cell division protease FtsH [EC:3.4.24.-]
CLUSTER1852	4	COG4471	Uncharacterized conserved protein YlbG, UPF0298 family	-	-
CLUSTER1853	4	COG0710	3-dehydroquinate dehydratase	K03785	3-dehydroquinate dehydratase I [EC:4.2.1.10]
CLUSTER1854	4	COG0326	Molecular chaperone, HSP90 family	K04079	molecular chaperone HtpG
CLUSTER1855	4	COG1195	Recombinational DNA repair ATPase RecF	K03629	DNA replication and repair protein RecF
CLUSTER1856	4	COG5823	Stage III sporulation protein SpoIIIAB, component of the engulfment complex	K06391	stage III sporulation protein AB
CLUSTER1857	4	COG3858	Spore cortex hydrolase SleL/YaaH, N-acetylglucosaminidase of GH18 family	-	-
CLUSTER1858	4	COG4585	Signal transduction histidine kinase ComP	K07777	two-component system, NarL family, sensor histidine kinase DegS [EC:2.7.13.3]
CLUSTER1859	4	COG3339	Uncharacterized membrane protein YkvA, DUF1232 family	-	-
CLUSTER1860	4	COG0607	Rhodanese-related sulfurtransferase	-	-
CLUSTER1861	4	COG3682	Transcriptional regulator, CopY/TcrY family	K02171	BlaI family transcriptional regulator, penicillinase repressor
CLUSTER1862	4	COG5914	Spore germination protein YpeB, HAD superfamily, activates cortex-lytic enzyme SleB	K06313	spore germination protein
CLUSTER1863	4	COG0687	Spermidine/putrescine-binding periplasmic protein	K02055	putative spermidine/putrescine transport system substrate-binding protein
CLUSTER1864	4	-	-	-	-
CLUSTER1865	4	COG2203;COG4585	GAF domain;Signal transduction histidine kinase ComP	K02480	two-component system, NarL family, sensor kinase [EC:2.7.13.3]
CLUSTER1866	4	COG0805	Twin-arginine protein secretion pathway component TatC	K03118	sec-independent protein translocase protein TatC
CLUSTER1867	4	COG1587	Uroporphyrinogen-III synthase	K01719	uroporphyrinogen-III synthase [EC:4.2.1.75]
CLUSTER1868	4	COG1044	UDP-3-O-[3-hydroxymyristoyl] glucosamine N-acyltransferase	-	-
CLUSTER1869	4	COG5867	Anti-sigma-F factor Fin	-	-
CLUSTER1870	4	COG1904	Glucuronate isomerase	K01812	glucuronate isomerase [EC:5.3.1.12]
CLUSTER1871	4	COG1012	Acyl-CoA reductase or other NAD-dependent aldehyde dehydrogenase	K00294	1-pyrroline-5-carboxylate dehydrogenase [EC:1.2.1.88]
CLUSTER1872	4	COG1167	DNA-binding transcriptional regulator, MocR family, contains an aminotransferase domain	-	-
CLUSTER1873	4	-	-	-	-
CLUSTER1874	4	COG0111	Phosphoglycerate dehydrogenase or related dehydrogenase	-	-
CLUSTER1875	4	COG4845	Chloramphenicol O-acetyltransferase	K19271	chloramphenicol O-acetyltransferase type A [EC:2.3.1.28]
CLUSTER1876	4	COG3457	Predicted amino acid racemase	-	-
CLUSTER1877	4	COG2357	ppGpp synthetase catalytic domain (RelA/SpoT-type nucleotidyltranferase)	K07816	putative GTP pyrophosphokinase [EC:2.7.6.5]
CLUSTER1878	4	COG3879	Uncharacterized conserved protein YlxW, UPF0749 family	-	-
CLUSTER1879	4	COG4842	Secreted virulence factor YukE/EsxA, WXG100 family	-	-
CLUSTER1880	4	COG2738	Zn-dependent membrane protease YugP	K06973	uncharacterized protein
CLUSTER1881	4	COG0747	ABC-type transport system, periplasmic component	K02035	peptide/nickel transport system substrate-binding protein
CLUSTER1882	4	COG0772	Peptodoglycan polymerase FtsW/RodA/SpoVE	K05837	rod shape determining protein RodA
CLUSTER1883	4	COG1198	Primosomal protein N' (replication factor Y) - superfamily II helicase	K04066	primosomal protein N' (replication factor Y) (superfamily II helicase) [EC:3.6.4.-]
CLUSTER1884	4	COG0360	Ribosomal protein S6	K02990	small subunit ribosomal protein S6
CLUSTER1885	4	COG0760	Peptidyl-prolyl isomerase, parvulin family	K07533	foldase protein PrsA [EC:5.2.1.8]
CLUSTER1886	4	COG5662	Transmembrane transcriptional regulator RsiW (anti-sigma-W factor)	-	-
CLUSTER1887	4	COG0628	Predicted PurR-regulated permease PerM	-	-
CLUSTER1888	4	COG1309	DNA-binding protein, AcrR family, includes nucleoid occlusion protein SlmA	K09017	TetR/AcrR family transcriptional regulator
CLUSTER1889	4	COG1290	Cytochrome b subunit of the bc complex	K03888	menaquinol-cytochrome c reductase cytochrome b/c subunit
CLUSTER1890	4	-	-	-	-
CLUSTER1891	4	COG2501	Ribosome-associated protein YbcJ, S4-like RNA-binding protein	K14761	ribosome-associated protein
CLUSTER1892	4	COG2226	Ubiquinone/menaquinone biosynthesis C-methylase UbiE/MenG	-	-
CLUSTER1893	4	COG0093	Ribosomal protein L14	K02874	large subunit ribosomal protein L14
CLUSTER1894	4	COG1597	Phosphatidylglycerol kinase, diacylglycerol kinase family	-	-
CLUSTER1895	4	COG3540	Phosphodiesterase/alkaline phosphatase D	K01113	alkaline phosphatase D [EC:3.1.3.1]
CLUSTER1896	4	-	-	-	-
CLUSTER1897	4	COG0471	Di- and tricarboxylate antiporter	K14445	solute carrier family 13 (sodium-dependent dicarboxylate transporter), member 2/3/5
CLUSTER1898	4	COG3382	B3/B4 domain (DNA/RNA-binding domain of Phe-tRNA-synthetase)	-	-
CLUSTER1899	4	-	-	-	-
CLUSTER1900	4	COG1284	Uncharacterized membrane-anchored protein YitT, contains DUF161 and DUF2179 domains	-	-
CLUSTER1901	4	-	-	-	-
CLUSTER1902	4	COG1345	Flagellar capping protein FliD	K02407	flagellar hook-associated protein 2
CLUSTER1903	4	-	-	-	-
CLUSTER1904	4	COG3971	2-keto-4-pentenoate hydratase	K01617	2-oxo-3-hexenedioate decarboxylase [EC:4.1.1.77]
CLUSTER1905	4	COG2226	Ubiquinone/menaquinone biosynthesis C-methylase UbiE/MenG	K03183	demethylmenaquinone methyltransferase / 2-methoxy-6-polyprenyl-1,4-benzoquinol methylase [EC:2.1.1.163 2.1.1.201]
CLUSTER1906	4	COG0236	Acyl carrier protein	K04780	glyine---[glycyl-carrier protein] ligase [EC:6.2.1.66]
CLUSTER1907	4	COG1359	Quinol monooxygenase YgiN	-	-
CLUSTER1908	4	COG1879	ABC-type sugar transport system, periplasmic component, contains N-terminal xre family HTH domain	K10439	ribose transport system substrate-binding protein
CLUSTER1909	4	COG5663	Uncharacterized conserved protein YqfW, HAD superfamily	K05967	uncharacterized protein
CLUSTER1910	4	COG1957	Inosine-uridine nucleoside N-ribohydrolase	K01239	purine nucleosidase [EC:3.2.2.1]
CLUSTER1911	4	COG5862	Small acid-soluble spore protein CsgA	-	-
CLUSTER1912	4	COG1052	Lactate dehydrogenase or related 2-hydroxyacid dehydrogenase	K00015	glyoxylate reductase [EC:1.1.1.26]
CLUSTER1913	4	-	-	-	-
CLUSTER1914	4	COG2182	Maltose-binding periplasmic protein MalE	K15770	arabinogalactan oligomer / maltooligosaccharide transport system substrate-binding protein
CLUSTER1915	4	COG1609	DNA-binding transcriptional regulator, LacI/PurR family	-	-
CLUSTER1916	4	-	-	-	-
CLUSTER1917	4	-	-	-	-
CLUSTER1918	4	-	-	-	-
CLUSTER1919	4	COG0034	Glutamine phosphoribosylpyrophosphate amidotransferase	K00764	amidophosphoribosyltransferase [EC:2.4.2.14]
CLUSTER1920	4	COG3377	Uncharacterized conserved protein YunC, DUF1805 family	-	-
CLUSTER1921	4	COG1309	DNA-binding protein, AcrR family, includes nucleoid occlusion protein SlmA	-	-
CLUSTER1922	4	-	-	-	-
CLUSTER1923	4	COG0114	Fumarate hydratase class II	K01679	fumarate hydratase, class II [EC:4.2.1.2]
CLUSTER1924	4	COG1680	CubicO group peptidase, beta-lactamase class C family	K22580	teichoic acid D-alanine hydrolase [EC:3.1.1.103]
CLUSTER1925	4	COG0444	ABC-type dipeptide/oligopeptide/nickel transport system, ATPase component	K15587	nickel transport system ATP-binding protein [EC:7.2.2.11]
CLUSTER1926	4	-	-	-	-
CLUSTER1927	4	COG5294	Uncharacterized conserved protein YxeA, DUF1093 family	-	-
CLUSTER1928	4	COG2224	Isocitrate lyase	K01637	isocitrate lyase [EC:4.1.3.1]
CLUSTER1929	4	COG1595	DNA-directed RNA polymerase specialized sigma subunit, sigma24 family	-	-
CLUSTER1930	4	-	-	-	-
CLUSTER1931	4	COG0096	Ribosomal protein S8	K02994	small subunit ribosomal protein S8
CLUSTER1932	4	-	-	K07794	putative tricarboxylic transport membrane protein
CLUSTER1933	4	COG0673	Predicted dehydrogenase	K18652	glucose-6-phosphate 3-dehydrogenase [EC:1.1.1.361]
CLUSTER1934	4	COG3879	Uncharacterized conserved protein YlxW, UPF0749 family	-	-
CLUSTER1935	4	COG2764	Zn-dependent glyoxalase, PhnB family	K04750	PhnB protein
CLUSTER1936	4	COG1277	ABC-type transport system involved in multi-copper enzyme maturation, permease component	K01992	ABC-2 type transport system permease protein
CLUSTER1937	4	COG0541	Signal recognition particle GTPase	K03106	signal recognition particle subunit SRP54 [EC:3.6.5.4]
CLUSTER1938	4	COG1284	Uncharacterized membrane-anchored protein YitT, contains DUF161 and DUF2179 domains	-	-
CLUSTER1939	4	COG0265	Periplasmic serine protease, S1-C subfamily, contain C-terminal PDZ domain	-	-
CLUSTER1940	4	COG1871	Chemotaxis receptor (MCP) glutamine deamidase CheD	K03411	chemotaxis protein CheD [EC:3.5.1.44]
CLUSTER1941	4	-	-	-	-
CLUSTER1942	4	COG0300	Short-chain dehydrogenase	-	-
CLUSTER1943	4	COG4477	Septation ring formation regulator EzrA	K06286	septation ring formation regulator
CLUSTER1944	4	COG2814	Predicted arabinose efflux permease AraJ, MFS family	K08221	MFS transporter, ACDE family, multidrug resistance protein
CLUSTER1945	4	-	-	-	-
CLUSTER1946	4	COG5505	Uncharacterized membrane protein YjcL	-	-
CLUSTER1947	4	COG1959	DNA-binding transcriptional regulator, IscR family	K13771	Rrf2 family transcriptional regulator, nitric oxide-sensitive transcriptional repressor
CLUSTER1948	4	COG2148	Sugar transferase involved in LPS biosynthesis (colanic, teichoic acid)	K19428	sugar transferase EpsL [EC:2.-.-.-]
CLUSTER1949	4	COG1511	Uncharacterized membrane protein YhgE, phage infection protein (PIP) family	K01421	putative membrane protein
CLUSTER1950	4	COG2866	Murein tripeptide amidase MpaA	-	-
CLUSTER1951	4	COG0122	3-methyladenine DNA glycosylase/8-oxoguanine DNA glycosylase	K01247	DNA-3-methyladenine glycosylase II [EC:3.2.2.21]
CLUSTER1952	4	COG4550	Cell fate regulator YmcA, YheA/YmcA/DUF963 family (controls sporulation, competence, biofilm development)	-	-
CLUSTER1953	4	COG2329	Heme-degrading monooxygenase HmoA and related ABM domain proteins	-	-
CLUSTER1954	4	COG1090	NAD dependent epimerase/dehydratase family enzyme	K07071	uncharacterized protein
CLUSTER1955	4	COG0677	UDP-N-acetyl-D-mannosaminuronate dehydrogenase	K13015	UDP-N-acetyl-D-glucosamine dehydrogenase [EC:1.1.1.136]
CLUSTER1956	4	COG1136	ABC-type lipoprotein export system, ATPase component	K24949	antimicrobial peptide resistance transport system ATP-binding protein [EC:7.6.2.-]
CLUSTER1957	4	-	-	-	-
CLUSTER1958	4	COG5848	SigmaK-processing regulatory protein BofA (Bypass-of-forespore protein A)	K06317	inhibitor of the pro-sigma K processing machinery
CLUSTER1959	4	COG1455	Phosphotransferase system cellobiose-specific component IIC	K02761	cellobiose PTS system EIIC component
CLUSTER1960	4	COG1739	Putative translation regulator, IMPACT (imprinted ancient) protein family	-	-
CLUSTER1961	4	COG0403	Glycine cleavage system protein P (pyridoxal-binding), N-terminal domain	K00282	glycine dehydrogenase subunit 1 [EC:1.4.4.2]
CLUSTER1962	4	COG5815	Stage II sporulation protein SpoIIAA (antagonist of anti-sigma F factor)	K06378	stage II sporulation protein AA (anti-sigma F factor antagonist)
CLUSTER1963	4	COG1536	Flagellar motor switch protein FliG	K02410	flagellar motor switch protein FliG
CLUSTER1964	4	COG2718	Uncharacterized conserved protein YeaH/YhbH, required for sporulation, DUF444 family	K09786	uncharacterized protein
CLUSTER1965	4	-	-	-	-
CLUSTER1966	4	COG5808	Sporulation sensor histidine kinase D	K13532	two-component system, sporulation sensor kinase D [EC:2.7.13.3]
CLUSTER1967	4	COG2882	Flagellar biosynthesis chaperone FliJ	K02413	flagellar protein FliJ
CLUSTER1968	4	COG0245	2C-methyl-D-erythritol 2,4-cyclodiphosphate synthase	K01770	2-C-methyl-D-erythritol 2,4-cyclodiphosphate synthase [EC:4.6.1.12]
CLUSTER1969	4	-	-	-	-
CLUSTER1970	4	COG0803	ABC-type Zn uptake system ZnuABC, Zn-binding component ZnuA	K19975	manganese transport system substrate-binding protein
CLUSTER1971	4	COG5803	Stage 0 sporulation initiation response regulator Spo0F	K02490	two-component system, response regulator, stage 0 sporulation protein F
CLUSTER1972	4	COG0168	Trk-type K+ transport system, membrane component	K03498	trk/ktr system potassium uptake protein
CLUSTER1973	4	COG2227	2-polyprenyl-3-methyl-5-hydroxy-6-metoxy-1,4-benzoquinol methylase	-	-
CLUSTER1974	4	COG0115	Branched-chain amino acid aminotransferase/4-amino-4-deoxychorismate lyase	K02619	4-amino-4-deoxychorismate lyase [EC:4.1.3.38]
CLUSTER1975	4	COG1159	GTPase Era, involved in 16S rRNA processing	-	-
CLUSTER1976	4	COG2323	Uncharacterized membrane protein YcaP, DUF421 family	-	-
CLUSTER1977	4	COG1977	Molybdopterin synthase sulfur carrier subunit MoaD	K03636	sulfur-carrier protein
CLUSTER1978	4	COG5578	Uncharacterized membrane protein YesL	-	-
CLUSTER1979	4	COG4214	ABC-type xylose transport system, permease component	K10547	putative multiple sugar transport system permease protein
CLUSTER1980	4	COG0164	Ribonuclease HII	K03470	ribonuclease HII [EC:3.1.26.4]
CLUSTER1981	4	COG0746	Molybdopterin-guanine dinucleotide biosynthesis protein A	K03752	molybdenum cofactor guanylyltransferase [EC:2.7.7.77]
CLUSTER1982	4	COG0110	Acetyltransferase, isoleucine patch superfamily	K19429	acetyltransferase EpsM [EC:2.3.1.-]
CLUSTER1983	4	COG3944	Capsular polysaccharide biosynthesis protein YveK	-	-
CLUSTER1984	4	COG1939	23S rRNA maturation mini-RNase III	K11145	ribonuclease III family protein [EC:3.1.26.-]
CLUSTER1985	4	COG0287	Prephenate dehydrogenase	K04517	prephenate dehydrogenase [EC:1.3.1.12]
CLUSTER1986	4	COG0531	Serine transporter YbeC, amino acid:H+ symporter family	K03758	arginine:ornithine antiporter / lysine permease
CLUSTER1987	4	-	-	-	-
CLUSTER1988	4	COG0705;COG3063	Membrane-associated serine protease, rhomboid family;Type IV pilus assembly protein PilF/PilW	K19225	rhomboid protease GluP [EC:3.4.21.105]
CLUSTER1989	4	-	-	-	-
CLUSTER1990	4	COG1600	Epoxyqueuosine reductase QueG (queuosine biosynthesis)	K18979	epoxyqueuosine reductase [EC:1.17.99.6]
CLUSTER1991	4	COG0300	Short-chain dehydrogenase	K07124	uncharacterized protein
CLUSTER1992	4	COG1249	Dihydrolipoamide dehydrogenase (E3) component of pyruvate/2-oxoglutarate dehydrogenase complex or glutathione oxidoreductase	K00382	dihydrolipoamide dehydrogenase [EC:1.8.1.4]
CLUSTER1993	4	COG0155	Sulfite reductase, beta subunit (hemoprotein)	K00381	sulfite reductase (NADPH) hemoprotein beta-component [EC:1.8.1.2]
CLUSTER1994	4	COG2199	GGDEF domain, diguanylate cyclase (c-di-GMP synthetase) or its enzymatically inactive variants	-	-
CLUSTER1995	4	COG5875	Uncharacterized sporulation protein YunB	-	-
CLUSTER1996	4	COG0371	Glycerol dehydrogenase or related enzyme, iron-containing ADH family	K00005	glycerol dehydrogenase [EC:1.1.1.6]
CLUSTER1997	4	COG2766	Predicted Ser/Thr protein kinase	K07180	serine protein kinase
CLUSTER1998	4	COG0457	Tetratricopeptide (TPR) repeat	K06359	response regulator aspartate phosphatase A (stage 0 sporulation protein L) [EC:3.1.-.-]
CLUSTER1999	4	COG0745	DNA-binding response regulator, OmpR family, contains REC and winged-helix (wHTH) domain	K07770	two-component system, OmpR family, response regulator CssR
CLUSTER2000	4	COG0347	Nitrogen regulatory protein PII	K04751	nitrogen regulatory protein P-II 1
CLUSTER2001	4	COG1082	Sugar phosphate isomerase/epimerase	K06605	myo-inositol catabolism protein IolH
CLUSTER2002	4	-	-	-	-
[truncated: 1,753 more rows]
